# Supplementary material
Source: MDPI journal article supplement (https://www.mdpi.com/2073-4352/12/9/1247)
Supplement: s1 [file s1]

Archive with 4 entries (4 files):
- Code_ml.py
- crystals-1886222-supplementary.pdf
- Data for Learning Process.xlsx
- README.txt
