# Supplementary material
Source: MDPI journal article supplement (https://www.mdpi.com/2073-4352/12/9/1247)
Supplement: s1 [file s1 › Data for Learning Process.xlsx]

## Sheet: Sheet2
ID	X-axis	Y-axis	strain	Mg	Al	Ca	Zr	KAM	Class	grain Aspect ratio	Grain Size	Misorientation	SF-Basal	SF-pris-a	SF-pris-c	SF-1stPy-a	SF-1stPy-c+a	SF-2nPy-c+a	AR squared	GS squared	MO squared	AR cube	Gs cube	MO cube	AR log	GS log	MO log	AR exp	GS*AR exp	MO*GS*AR exp	GS sin	GS cos	AR sin	AR cos	MO sin	MO cos	AR sqrt	GS sqrt	MO sqrt	Sfb sin	Sfb cos	Sfb cos2	Sfb sqrt	total schmid	Avg schmid	median schmid	stdev schmid	range schmid	TS square
1387	785.625	903.481	5	100	0	0	0	3.29697	1	0.618601	2.22755	70.2354	0.319444	0.0579166	0.299771	0.165284	0.498203	0.485092	0.382667	4.96198	4933.01	0.236718	11.0531	346472	-0.208589	0.347827	1.84656	1.85633	2.63346	2.30439	0.791978	-0.610549	0.579896	0.814691	0.900258	0.435357	0.786512	1.4925	8.38066	18.6293	71.3707	88.9032	0.565194	1.82571	0.304285	0.309608	0.173531	0.840298	3.33322
1448	789.214	912.667	5	100	0	0	0	1.38621	1	0.26909	4.16736	72.0451	0.295554	0.0489088	0.280397	0.153195	0.497021	0.491646	0.0724094	17.3669	5190.5	0.0194847	72.3741	373950	-0.570102	0.619861	1.8576	1.30877	1.65788	2.28139	-0.855112	-0.518443	0.265854	0.964013	0.209957	-0.977711	0.518739	2.04141	8.48794	17.1908	72.8092	92.5231	0.543649	1.76672	0.294454	0.287975	0.179088	0.824973	3.12131
519	780.485	943.122	5	100	0	0	0	0.647361	0	0.624574	24.4523	32.8361	0.314235	0.416962	0.338069	0.495573	0.489096	0.410226	0.390093	597.915	1078.21	0.243642	14620.4	35404.2	-0.204416	1.38832	1.51635	1.86745	3.38054	2.5144	-0.629136	0.777295	0.584752	0.811212	0.988678	0.150054	0.7903	4.94493	5.73028	18.3146	71.6854	89.6888	0.560567	2.46416	0.410693	0.413594	0.0747925	1.0198	6.07209
466	767.099	913.492	5	100	0	0	0	0.817291	0	0.526034	42.088	47.1305	0.201947	0.453115	0.218851	0.483173	0.493513	0.423649	0.276712	1771.4	2221.28	0.14556	74554.7	104690	-0.278986	1.62416	1.6733	1.69221	2.82662	1.82283	-0.948128	-0.317888	0.502107	0.864805	-0.00661015	-0.999978	0.725282	6.48753	6.86517	11.6508	78.3492	107.139	0.449385	2.27425	0.379041	0.438382	0.133002	0.974926	5.1722
1342	775.172	901.614	5	100	0	0	0	1.19484	1	0.216881	6.30045	55.7435	0.343795	0.422585	0.349952	0.496313	0.482206	0.432882	0.0470374	39.6957	3107.34	0.0102015	250.101	173214	-0.663778	0.799372	1.74619	1.2422	1.52094	2.6441	0.0172638	0.999851	0.215185	0.976573	-0.720947	0.69299	0.465705	2.51007	7.46616	20.1083	69.8917	85.2568	0.58634	2.52773	0.421289	0.427733	0.0641402	1.04186	6.38943
1408	780.543	909.461	5	100	0	0	0	1.13468	1	0.161125	8.48224	77.8923	0.206188	0.0219586	0.190226	0.101059	0.482784	0.497715	0.0259613	71.9484	6067.21	0.00418301	610.284	472589	-0.792837	0.928511	1.89149	1.17483	1.37196	1.82637	0.809052	-0.587737	0.160429	0.987047	0.603207	-0.797584	0.401404	2.91243	8.82566	11.8991	78.1009	106.461	0.454079	1.49993	0.249988	0.198207	0.197601	0.755113	2.24979
961	947.25	789.815	5	100	0	0	0	1.58251	1	0.618624	2.22755	73.791	0.421303	0.102976	0.370467	0.203633	0.484995	0.429945	0.382696	4.96198	5445.11	0.236745	11.0531	401800	-0.208573	0.347827	1.868	1.85637	2.63354	2.88004	0.791978	-0.610549	0.579915	0.814677	-0.999337	-0.0364193	0.786527	1.4925	8.59017	24.9169	65.0831	73.9289	0.649079	2.01332	0.335553	0.395885	0.149204	0.887066	4.05345
960	927.758	799.335	5	100	0	0	0	0.657104	0	0.49219	21.6543	15.5672	0.22404	0.456503	0.20864	0.467454	0.480487	0.491892	0.242251	468.909	242.338	0.119234	10153.9	3772.52	-0.307867	1.33554	1.19221	1.63589	2.61824	1.92687	0.330514	-0.943801	0.472557	0.8813	0.140299	-0.990109	0.701563	4.65342	3.94553	12.9464	77.0536	103.625	0.473329	2.32902	0.388169	0.461978	0.13372	0.996724	5.42432
798	944.167	780.578	5	100	0	0	0	0.608988	0	0.284685	4.72534	24.5867	0.199858	0.472012	0.2074	0.491503	0.497047	0.449695	0.0810455	22.3288	604.506	0.0230725	105.511	14862.8	-0.545635	0.674433	1.3907	1.32934	1.7109	1.76967	-0.999916	0.0129507	0.280855	0.95975	-0.519308	0.854587	0.533559	2.17378	4.9585	11.5287	78.4713	107.473	0.447055	2.31752	0.386253	0.460854	0.142453	0.998303	5.37088
394	940.536	767.102	5	100	0	0	0	0.685584	0	0.675613	23.9396	25.2663	0.198804	0.467227	0.209421	0.489423	0.496156	0.441117	0.456453	573.104	638.386	0.308386	13719.9	16129.7	-0.170302	1.37912	1.40254	1.96524	3.72155	1.79844	-0.929532	0.368742	0.625376	0.780324	0.133162	0.991094	0.821957	4.89281	5.02656	11.467	78.533	107.642	0.445874	2.30215	0.383691	0.454172	0.140468	0.990945	5.29989
992	920.25	793.712	5	100	0	0	0	1.06261	1	0.453206	2.72818	79.0149	0.30981	0.399556	0.273172	0.429428	0.449296	0.489392	0.205396	7.44297	6243.35	0.0930866	20.3058	493318	-0.343704	0.435873	1.89771	1.57335	2.17557	2.29727	0.401737	-0.915755	0.43785	0.899048	-0.457413	-0.889254	0.673206	1.65172	8.88903	18.0478	71.9522	90.3578	0.556606	2.35065	0.391776	0.414492	0.0837866	0.977768	5.52557
796	941.035	787.12	5	100	0	0	0	0.978178	1	0.561207	15.2713	42.1241	0.0367368	0.450955	0.0325679	0.407219	0.423347	0.460768	0.314953	233.213	1774.44	0.176754	3561.46	74746.7	-0.250877	1.18388	1.62453	1.75279	2.95243	1.11611	0.422918	-0.906168	0.532208	0.846613	-0.958984	-0.283461	0.749138	3.90785	6.49031	2.10534	87.8947	134.835	0.191668	1.81159	0.301932	0.415283	0.207918	0.873572	3.28187
390	947.532	670.69	5	100	0	0	0	0.731321	0	0.486024	28.6133	41.152	0.426917	0.323958	0.463694	0.462837	0.400917	0.303496	0.236219	818.721	1693.49	0.114808	23426.3	69690.4	-0.313342	1.45657	1.61439	1.62584	2.60078	3.48739	-0.332512	-0.943099	0.467114	0.884197	-0.306292	-0.951938	0.697154	5.34914	6.41498	25.2721	64.7279	73.1242	0.653389	2.38182	0.39697	0.413917	0.0689508	0.984521	5.67306
1416	954	658.612	5	100	0	0	0	1.40528	1	0.618624	2.22755	38.2859	0.0618128	0.469691	0.0677345	0.440607	0.450355	0.392762	0.382696	4.96198	1465.81	0.236745	11.0531	56119.9	-0.208573	0.347827	1.58304	1.85637	2.63354	1.1974	0.791978	-0.610549	0.579915	0.814677	0.553689	0.832723	0.786527	1.4925	6.18756	3.54387	86.4561	130.457	0.248622	1.88296	0.313827	0.416685	0.194582	0.883309	3.54555
804	964.694	637.241	5	100	0	0	0	0.711366	0	0.648946	47.5416	7.17581	0.0245612	0.440636	0.0214792	0.394806	0.413654	0.456516	0.421131	2260.2	51.4922	0.273291	107454	369.499	-0.187791	1.67707	0.855871	1.91352	3.59813	1.07615	-0.405669	-0.91402	0.604347	0.796721	0.778721	0.62737	0.805572	6.89504	2.67877	1.40739	88.5926	136.985	0.15672	1.75165	0.291942	0.40423	0.209395	0.854759	3.06829
1235	928.555	652.567	5	100	0	0	0	0.639644	0	0.682183	22.5522	28.7063	0.0171516	0.443975	0.0195271	0.399647	0.415776	0.35101	0.465374	508.602	824.052	0.31747	11470.1	23655.5	-0.166099	1.35319	1.45798	1.97819	3.75958	1.05273	-0.532077	-0.846696	0.630489	0.776198	-0.418657	-0.908144	0.825944	4.74892	5.35783	0.982762	89.0172	138.301	0.130964	1.64709	0.274514	0.375328	0.200717	0.808446	2.71289
672	921.462	621.609	5	100	0	0	0	0.77449	0	0.522233	32.126	30.1841	0.204972	0.430561	0.229795	0.470761	0.487467	0.401035	0.272727	1032.08	911.08	0.142427	33156.6	27500.1	-0.282136	1.50686	1.47978	1.68579	2.7948	1.83478	0.651889	0.758314	0.498817	0.866707	-0.943098	0.332516	0.722657	5.66798	5.49401	11.8279	78.1721	106.655	0.452738	2.22459	0.370765	0.415798	0.122858	0.948826	4.94881
593	944.124	611.169	5	100	0	0	0	0.655677	0	0.614074	30.4612	13.1075	0.0797315	0.493464	0.0774438	0.461069	0.462782	0.45713	0.377087	927.885	171.807	0.231559	28264.5	2251.95	-0.211779	1.48375	1.11752	1.84794	3.33302	1.26761	-0.816156	0.577832	0.576202	0.817307	0.515104	0.857127	0.783629	5.51917	3.62043	4.57313	85.4269	127.37	0.282368	2.03162	0.338603	0.459099	0.201825	0.944236	4.12748
1253	944.629	650.6	5	100	0	0	0	0.759834	0	0.316776	15.3523	26.172	0.0991321	0.493818	0.100304	0.470878	0.472799	0.44628	0.100347	235.693	684.974	0.0317875	3618.43	17927.1	-0.499248	1.18617	1.41784	1.3727	1.86031	1.34229	0.348212	-0.937416	0.311505	0.950245	0.862029	0.506859	0.562829	3.9182	5.11586	5.6892	84.3108	124.063	0.314853	2.08321	0.347202	0.458579	0.192292	0.952982	4.33977
983	895.948	649.856	5	100	0	0	0	0.695541	0	0.601484	52.6183	23.5209	0.206784	0.469797	0.213028	0.490876	0.496246	0.451566	0.361783	2768.69	553.233	0.217607	145684	13012.5	-0.220776	1.72114	1.37145	1.82482	3.28502	1.84515	0.709491	-0.704715	0.565867	0.824497	-0.999158	-0.0410334	0.775554	7.25385	4.84984	11.934	78.066	106.366	0.454735	2.3283	0.388049	0.460682	0.138915	0.99999	5.42097
1494	922.714	673.273	5	100	0	0	0	1.05619	1	0.537971	4.16736	34.7147	0.137498	0.436199	0.156014	0.447368	0.470284	0.388388	0.289413	17.3669	1205.11	0.155696	72.3741	41835	-0.269241	0.619861	1.54051	1.71253	2.59329	1.48854	-0.855112	-0.518443	0.512395	0.85875	-0.156534	-0.987673	0.733465	2.04141	5.89192	7.90309	82.0969	117.633	0.370807	2.03575	0.339292	0.412293	0.151626	0.897589	4.14428
387	941.582	687.91	5	100	0	0	0	0.658887	0	0.507429	23.0957	38.2642	0.294524	0.412299	0.324204	0.489434	0.489628	0.400583	0.257484	533.411	1464.15	0.130655	12319.5	56024.5	-0.294625	1.36353	1.58279	1.66102	2.69943	2.37706	-0.893263	-0.449535	0.485932	0.873997	0.53549	0.844541	0.712341	4.8058	6.18581	17.129	72.871	92.6802	0.542701	2.41067	0.401779	0.406441	0.0812828	1.0008	5.81134
1463	925.907	669.005	5	100	0	0	0	1.27421	1	0.657521	9.31849	22.0411	0.0295714	0.495952	0.0305251	0.448635	0.444492	0.414737	0.432334	86.8343	485.81	0.284269	809.164	10707.8	-0.18209	0.969346	1.34323	1.93	3.41565	1.09233	0.106088	-0.994357	0.611157	0.79151	-0.0499307	-0.998753	0.810877	3.05262	4.69479	1.69456	88.3054	136.098	0.171963	1.86391	0.310652	0.429615	0.218906	0.904781	3.47417
1095	743.562	886.317	5	100	0	0	0	0.934664	1	0.611612	21.9953	35.4757	0.100221	0.459858	0.110819	0.448962	0.463729	0.397459	0.374069	483.793	1258.53	0.228785	10641.2	44647.1	-0.213524	1.34233	1.54993	1.8434	3.28751	1.34778	-0.00415141	-0.999991	0.574188	0.818723	-0.794498	-0.607267	0.782056	4.68991	5.95615	5.7519	84.2481	123.879	0.316577	1.98105	0.330175	0.423211	0.175663	0.899099	3.92455
347	754.014	854.783	5	100	0	0	0	0.612666	0	0.709128	43.3086	23.6039	0.308046	0.431307	0.288614	0.470857	0.475261	0.479672	0.502863	1875.63	557.144	0.356594	81231.1	13150.8	-0.149275	1.63657	1.37298	2.03222	4.03662	2.47409	-0.62388	0.78152	0.651172	0.75893	-0.99912	0.0419428	0.842097	6.58093	4.85838	17.9415	72.0585	90.6249	0.555019	2.45376	0.408959	0.451082	0.0876281	1.02073	6.02092
616	778.974	866.697	5	100	0	0	0	0.60127	0	0.550072	21.4238	18.1119	0.159264	0.485918	0.159265	0.483656	0.488585	0.464009	0.302579	458.979	328.041	0.16644	9833.08	5941.44	-0.25958	1.3309	1.25796	1.73338	2.92298	1.60025	0.537398	-0.843329	0.522749	0.852487	-0.672555	0.740047	0.741668	4.62859	4.25581	9.16418	80.8358	114.047	0.399079	2.2407	0.373449	0.473832	0.166134	0.987314	5.02072
1307	774.75	893.738	5	100	0	0	0	0.881711	0	0.618624	2.22755	76.3018	0.231428	0.0257398	0.205238	0.110949	0.488915	0.499873	0.382696	4.96198	5821.96	0.236745	11.0531	444226	-0.208573	0.347827	1.88253	1.85637	2.63354	1.87239	0.791978	-0.610549	0.579915	0.814677	0.785545	0.618805	0.786527	1.4925	8.73509	13.3812	76.6188	102.459	0.48107	1.56214	0.260357	0.218333	0.195371	0.773023	2.44029
1222	766.159	889.96	5	100	0	0	0	1.27662	1	0.441732	10.4481	46.4598	0.202643	0.45927	0.216864	0.486659	0.494859	0.431243	0.195127	109.163	2158.51	0.0861939	1140.54	100284	-0.354841	1.01904	1.66708	1.5554	2.3341	1.8109	-0.853842	-0.520532	0.427506	0.904013	0.616343	-0.787478	0.664629	3.23235	6.81614	11.6916	78.3084	107.027	0.450159	2.29154	0.381923	0.445256	0.135296	0.983217	5.25115
1221	756.188	887.568	5	100	0	0	0	1.35334	1	0.367066	3.15023	78.1192	0.203003	0.0211063	0.188684	0.100249	0.482926	0.498912	0.134737	9.92395	6102.61	0.0494575	31.2627	476731	-0.435256	0.498342	1.89276	1.44349	1.93	1.76959	-0.00863724	-0.999963	0.358878	0.933384	0.408323	-0.912837	0.60586	1.77489	8.83851	11.7126	78.2874	106.97	0.450559	1.49488	0.249147	0.195844	0.198491	0.754611	2.23467
984	764.485	879.275	5	100	0	0	0	1.12196	1	0.577884	16.6694	6.46108	0.0504733	0.470129	0.0461617	0.428753	0.438088	0.462377	0.33395	277.869	41.7456	0.192984	4631.91	269.721	-0.238159	1.22192	0.810305	1.78226	3.05581	1.1616	-0.820015	-0.572342	0.546253	0.83762	0.176958	0.984218	0.760187	4.08282	2.54187	2.89314	87.1069	132.429	0.224663	1.89598	0.315997	0.43342	0.207903	0.902908	3.59475
1287	769.324	898.629	5	100	0	0	0	1.05111	1	0.166647	6.49435	54.1927	0.335533	0.428521	0.338142	0.495817	0.484664	0.442237	0.0277712	42.1766	2936.85	0.00462799	273.909	159156	-0.778203	0.812536	1.73394	1.18134	1.38397	2.58971	0.209599	0.977787	0.165877	0.986146	-0.707267	-0.706946	0.408224	2.5484	7.36157	19.605	70.395	86.4891	0.579252	2.52491	0.420819	0.435379	0.069754	1.04253	6.37519
747	760.875	348.792	5	100	0	0	0	0.733226	0	0.618624	2.22755	77.8632	0.122763	0.44571	0.137998	0.448015	0.468164	0.392169	0.382696	4.96198	6062.68	0.236745	11.0531	472060	-0.208573	0.347827	1.89133	1.85637	2.63354	1.41699	0.791978	-0.610549	0.579915	0.814677	0.626158	-0.779696	0.786527	1.4925	8.82401	7.05159	82.9484	120.086	0.350376	2.01482	0.335803	0.41894	0.161171	0.898033	4.0595
534	747.215	349.998	5	100	0	0	0	0.49608	0	0.451625	18.1651	24.9057	0.0148388	0.493016	0.01551	0.440741	0.436126	0.401878	0.203965	329.971	620.294	0.0921158	5993.95	15448.9	-0.345222	1.25924	1.3963	1.57086	2.41413	1.04546	-0.632252	0.774763	0.436428	0.899739	-0.225096	0.974337	0.672031	4.26205	4.99056	0.850232	89.1498	138.713	0.121815	1.80211	0.300352	0.419002	0.222811	0.888532	3.2476
1011	759.375	361.782	5	100	0	0	0	0.942012	1	0.618621	2.22755	46.2167	0.413745	0.373517	0.422668	0.479348	0.438197	0.379625	0.382692	4.96198	2135.98	0.236741	11.0531	98718.1	-0.208575	0.347827	1.6648	1.85637	2.63353	2.82627	0.791978	-0.610549	0.579912	0.814679	0.787776	-0.615962	0.786525	1.4925	6.79829	24.4403	65.5597	75.0155	0.64323	2.5071	0.41785	0.418206	0.0391475	1.02726	6.28555
805	756.375	351.39	5	100	0	0	0	1.31886	1	0.618621	2.22755	36.186	0.465728	0.311781	0.416569	0.395449	0.350474	0.36954	0.382692	4.96198	1309.43	0.236741	11.0531	47382.9	-0.208575	0.347827	1.55854	1.85637	2.63353	3.13744	0.791978	-0.610549	0.579912	0.814679	-0.998337	0.0576525	0.786525	1.4925	6.01548	27.7573	62.2427	67.6166	0.682443	2.30954	0.384923	0.382494	0.0536933	0.95048	5.33398
529	959.612	775.718	5	100	0	0	0	0.750627	0	0.579588	23.4687	24.892	0.354784	0.414739	0.336071	0.472913	0.465341	0.459943	0.335922	550.78	619.612	0.194697	12926.1	15423.4	-0.236881	1.37049	1.39606	1.7853	3.09949	2.81225	-0.995656	-0.0931098	0.547679	0.836688	-0.238423	0.971162	0.761307	4.84445	4.98919	20.7802	69.2198	83.6254	0.595637	2.50379	0.417298	0.437341	0.0595519	1.03081	6.26897
617	951.375	770.979	5	100	0	0	0	1.34864	1	0.358349	3.15023	82.0816	0.134061	0.467429	0.123334	0.449923	0.464956	0.485042	0.128414	9.92395	6737.39	0.046017	31.2627	553016	-0.445694	0.498342	1.91425	1.43096	1.90313	1.46985	-0.00863724	-0.999963	0.350729	0.936477	0.389594	0.920987	0.598623	1.77489	9.05989	7.70433	82.2957	118.204	0.366143	2.12474	0.354124	0.457439	0.175003	0.951606	4.51454
1042	933.546	821.171	5	100	0	0	0	0.566694	0	0.498507	38.5502	31.2169	0.422361	0.367501	0.393734	0.446416	0.418391	0.41734	0.248509	1486.12	974.495	0.123884	57290.1	30420.7	-0.302329	1.58603	1.49439	1.64626	2.6759	3.44457	0.751998	0.659165	0.478115	0.878297	-0.197715	0.98026	0.70605	6.20888	5.58721	24.9837	65.0163	73.7771	0.649893	2.46574	0.410957	0.417866	0.0270867	1.00846	6.07989
1175	960.208	817.959	5	100	0	0	0	1.15168	1	0.54995	22.7712	7.43223	0.0915412	0.4491	0.081283	0.41949	0.441006	0.478489	0.302445	518.528	55.238	0.16633	11807.5	410.542	-0.259677	1.35739	0.871119	1.73317	2.92695	1.31024	-0.703316	-0.710877	0.522645	0.852551	0.912373	0.409359	0.741586	4.77192	2.72621	5.25228	84.7477	125.353	0.302558	1.96091	0.326818	0.430248	0.187204	0.903376	3.84516
1066	970.125	798.259	5	100	0	0	0	3.14944	1	0.618611	2.22755	52.5974	0.39208	0.395367	0.392029	0.483861	0.455869	0.413009	0.38268	4.96198	2766.49	0.23673	11.0531	145510	-0.208582	0.347827	1.72096	1.85635	2.6335	2.70173	0.791978	-0.610549	0.579904	0.814685	0.724063	-0.689734	0.786518	1.4925	7.25241	23.084	66.916	78.1515	0.626163	2.53221	0.422036	0.404188	0.038878	1.03742	6.41211
820	968.111	785.918	5	100	0	0	0	0.657293	0	0.605409	11.5747	24.2984	0.0957995	0.491808	0.0986059	0.469289	0.471919	0.437474	0.36652	133.974	590.412	0.221895	1550.71	14346.1	-0.217951	1.06351	1.38558	1.832	3.1602	1.32834	-0.836941	0.547292	0.569098	0.822269	-0.740854	0.671666	0.77808	3.40216	4.92934	5.49734	84.5027	124.629	0.309515	2.0649	0.344149	0.453381	0.192076	0.946097	4.26379
940	958.535	796.492	5	100	0	0	0	0.870853	0	0.647453	20.6575	30.7009	0.183497	0.436984	0.205448	0.466696	0.484607	0.401906	0.419195	426.732	942.545	0.271409	8815.22	28937	-0.188792	1.31508	1.48715	1.91067	3.50978	1.72018	0.972012	-0.234931	0.603157	0.797623	-0.655637	0.755076	0.804645	4.54505	5.54084	10.5735	79.4265	110.105	0.428365	2.17914	0.36319	0.419445	0.133845	0.938623	4.74864
392	974.166	674.962	5	100	0	0	0	0.557632	0	0.620594	32.0876	35.387	0.404237	0.388393	0.39448	0.473985	0.444661	0.416206	0.385137	1029.61	1252.24	0.239014	33037.8	44313	-0.207192	1.50634	1.54884	1.86003	3.3792	3.26828	0.622297	0.782781	0.581519	0.813533	-0.737581	-0.675259	0.787778	5.66459	5.9487	23.8433	66.1567	76.3879	0.635796	2.52196	0.420327	0.410222	0.0329698	1.03222	6.36029
332	975.739	559.756	5	100	0	0	0	0.601655	0	0.53449	59.9163	24.4008	0.26493	0.455282	0.271801	0.498597	0.498852	0.452077	0.28568	3589.96	595.399	0.152693	215097	14528.2	-0.27206	1.77754	1.3874	1.70658	2.88501	2.18765	-0.22412	-0.974562	0.509402	0.860529	-0.668315	0.743878	0.731088	7.74056	4.93972	15.3628	74.6372	97.2273	0.514714	2.44154	0.406923	0.45368	0.109227	1.02624	5.96111
540	990.572	610.512	5	100	0	0	0	0.561355	0	0.534256	23.0957	20.2454	0.156184	0.485916	0.15789	0.483983	0.488805	0.458736	0.285429	533.411	409.876	0.152492	12319.5	8298.11	-0.272251	1.36353	1.30633	1.70618	2.84156	1.58703	-0.893263	-0.449535	0.509201	0.860648	0.984735	0.174061	0.730928	4.8058	4.49949	8.98547	81.0145	114.552	0.395201	2.23151	0.371919	0.471359	0.166795	0.984401	4.97965
1496	952.5	584.567	5	100	0	0	0	0.718312	0	0.45322	2.72818	87.2666	0.102586	0.00584572	0.105527	0.0513019	0.451405	0.48256	0.205408	7.44297	7615.46	0.0930952	20.3058	664575	-0.343691	0.435873	1.94085	1.57337	2.17561	1.34483	0.401737	-0.915755	0.437863	0.899042	-0.642682	0.766133	0.673216	1.65172	9.34166	5.8881	84.1119	123.479	0.32029	1.19923	0.199871	0.104056	0.210365	0.678938	1.43814
763	965.083	612.521	5	100	0	0	0	0.89763	0	0.883273	8.18453	34.2643	0.256353	0.447055	0.238356	0.468125	0.479594	0.49074	0.780171	66.9865	1174.04	0.689104	548.253	40227.7	-0.053905	0.912994	1.53484	2.4188	4.92572	2.09663	0.945865	-0.324562	0.77282	0.634625	0.289036	-0.957318	0.939826	2.86086	5.85357	14.8538	75.1462	98.558	0.506313	2.38022	0.396704	0.45759	0.116724	1.00616	5.66546
570	946.25	597.125	5	100	0	0	0	0.851937	0	0.291328	4.72534	83.6076	0.274418	0.0468206	0.29054	0.157371	0.490076	0.489962	0.084872	22.3288	6990.23	0.0247256	105.511	584436	-0.535618	0.674433	1.92225	1.3382	1.73121	2.17203	-0.999916	0.0129507	0.287225	0.957863	0.937509	-0.34796	0.539748	2.17378	9.14372	15.9273	74.0727	95.762	0.523849	1.74919	0.291531	0.282479	0.177184	0.816648	3.05966
330	967.643	595.677	5	100	0	0	0	0.602163	0	0.564315	33.8193	30.5387	0.152089	0.435755	0.172128	0.45324	0.475173	0.392255	0.318451	1143.75	932.612	0.179707	38680.7	28480.8	-0.248478	1.52916	1.48485	1.75824	3.03468	1.57143	0.672972	-0.739668	0.534837	0.844955	-0.768969	0.639286	0.751209	5.81544	5.52618	8.74801	81.252	115.225	0.389986	2.08064	0.346773	0.414005	0.145747	0.909792	4.32906
767	803.048	886.469	5	100	0	0	0	0.639137	0	0.595988	50.7464	29.0073	0.40648	0.379776	0.379648	0.453244	0.431836	0.431114	0.355202	2575.2	841.423	0.211696	130682	24407.4	-0.224762	1.70541	1.46251	1.81482	3.24832	3.29749	0.462593	0.886571	0.561327	0.827594	-0.669077	-0.743193	0.772003	7.12365	5.38584	23.9839	66.0161	76.0636	0.637558	2.4821	0.413683	0.418797	0.030194	1.01556	6.16081
1252	762.542	892.8	5	100	0	0	0	1.21693	1	0.208369	6.68264	71.9724	0.301481	0.0474782	0.272577	0.148639	0.498507	0.491442	0.0434176	44.6577	5180.03	0.00904689	298.431	372819	-0.681167	0.824948	1.85717	1.23167	1.49801	2.36777	0.388916	0.921273	0.206864	0.97837	0.280419	-0.959878	0.456475	2.58508	8.48365	17.5466	72.4534	91.621	0.549073	1.76012	0.293354	0.287029	0.180677	0.824355	3.09804
463	731.367	913.998	5	100	0	0	0	0.498435	0	0.688526	34.075	31.1965	0.201111	0.423548	0.227935	0.464872	0.484771	0.393916	0.474068	1161.11	973.222	0.326408	39564.7	30361.1	-0.16208	1.53244	1.49411	1.99078	3.85657	1.8148	0.464012	-0.885829	0.6354	0.772183	-0.21767	0.976022	0.829775	5.83738	5.58538	11.6019	78.3981	107.272	0.448454	2.19615	0.366026	0.408732	0.121839	0.937055	4.82309
465	750.671	927.582	5	100	0	0	0	1.24617	1	0.402801	6.86576	29.234	0.0720471	0.46407	0.0795391	0.44045	0.452944	0.391137	0.162249	47.1387	854.627	0.0653539	323.643	24984.2	-0.394909	0.836689	1.46589	1.49601	2.14033	1.23785	0.550176	0.835049	0.391997	0.919967	-0.819	-0.573793	0.634666	2.62026	5.40685	4.13157	85.8684	128.69	0.268416	1.90019	0.316698	0.415794	0.188274	0.882622	3.61071
518	761.478	945.146	5	100	0	0	0	0.745925	0	0.517181	24.2485	31.9205	0.37291	0.408736	0.372218	0.488535	0.467617	0.427772	0.267476	587.99	1018.92	0.138334	14257.9	32524.4	-0.286357	1.38468	1.50407	1.67729	2.75319	2.97205	-0.773434	0.633877	0.494432	0.869216	0.483434	0.875381	0.719153	4.92428	5.64982	21.8952	68.1048	80.953	0.610664	2.53779	0.422965	0.418254	0.0481655	1.04163	6.44037
462	720.677	958.939	5	100	0	0	0	0.614413	0	0.490844	64.7339	15.462	0.225405	0.427146	0.199705	0.433626	0.459892	0.498975	0.240928	4190.48	239.073	0.118258	271266	3696.55	-0.309057	1.81113	1.18927	1.63369	2.64931	1.94297	0.945636	-0.325226	0.47137	0.881935	0.243491	-0.969903	0.700603	8.04574	3.93217	13.0267	76.9733	103.409	0.474768	2.24475	0.374125	0.430386	0.127934	0.960027	5.0389
1440	771.547	995.224	5	100	0	0	0	0.747646	0	0.217701	22.2197	30.2968	0.208714	0.446173	0.228322	0.481579	0.493076	0.417836	0.0473937	493.715	917.896	0.0103177	10970.2	27809.3	-0.66214	1.34674	1.4814	1.24322	1.53907	1.85171	-0.226567	-0.973996	0.215985	0.976397	-0.89972	0.436468	0.466584	4.71378	5.50425	12.047	77.953	106.058	0.456852	2.2757	0.379283	0.432005	0.127481	0.971798	5.17881
1480	803.25	997.898	5	100	0	0	0	1.01382	1	0.356361	7.38793	29.089	0.181561	0.453935	0.198097	0.476578	0.489318	0.418524	0.126993	54.5815	846.17	0.0452554	403.244	24614.2	-0.44811	0.868523	1.46373	1.42812	1.97373	1.69622	0.893349	0.449363	0.348866	0.937173	-0.727497	-0.686111	0.59696	2.71807	5.39342	10.4607	79.5393	110.418	0.4261	2.21801	0.369669	0.436229	0.14146	0.959158	4.91958
949	793.908	973.44	5	100	0	0	0	0.802577	0	0.659522	42.4985	20.8531	0.271211	0.455437	0.264425	0.48977	0.491914	0.474434	0.434969	1806.12	434.852	0.286872	76757.5	9068.01	-0.180771	1.62837	1.31917	1.93387	3.66521	2.22145	-0.996218	0.0868895	0.612739	0.790285	0.907817	-0.419367	0.81211	6.51909	4.56652	15.7363	74.2637	96.2565	0.520779	2.44719	0.407865	0.464936	0.109285	1.02851	5.98874
1479	796.875	997.012	5	100	0	0	0	1.85441	1	0.618601	2.22755	41.9457	0.0423385	0.442603	0.048245	0.409985	0.429393	0.360458	0.382667	4.96198	1759.44	0.236718	11.0531	73801	-0.208589	0.347827	1.62269	1.85633	2.63346	1.13261	0.791978	-0.610549	0.579896	0.814691	-0.893462	-0.449138	0.786512	1.4925	6.47655	2.42654	87.5735	133.851	0.205763	1.73302	0.288837	0.385221	0.19071	0.826083	3.00337
470	814.136	924.076	5	100	0	0	0	0.664742	0	0.517135	32.9648	20.4326	0.19414	0.472989	0.185795	0.477455	0.486104	0.48322	0.267429	1086.68	417.491	0.138297	35822.1	8530.43	-0.286396	1.51805	1.31032	1.67722	2.76847	1.77463	0.99976	0.0219211	0.494392	0.869239	0.999925	-0.0122474	0.719121	5.7415	4.52024	11.1945	78.8055	108.39	0.440613	2.2997	0.383284	0.475222	0.149834	0.99684	5.28863
755	817.271	956.324	5	100	0	0	0	0.792148	0	0.56172	25.0041	24.9505	0.0925987	0.489718	0.0962782	0.467054	0.470332	0.43152	0.315529	625.205	622.527	0.177239	15632.7	15532.4	-0.25048	1.39801	1.39708	1.75369	3.00043	1.31752	-0.128287	0.991737	0.532643	0.84634	-0.181234	0.98344	0.74948	5.00041	4.99505	5.31313	84.6869	125.173	0.3043	2.0475	0.34125	0.449287	0.192104	0.939803	4.19226
468	796.719	932.529	5	100	0	0	0	0.976995	1	0.637115	19.7988	16.8328	0.265665	0.430395	0.240515	0.450802	0.468075	0.49435	0.405916	391.992	283.343	0.258615	7760.98	4769.46	-0.195782	1.29664	1.22616	1.89102	3.43667	2.16925	0.812976	0.582298	0.594879	0.803815	-0.902197	-0.431324	0.798195	4.44958	4.10278	15.4065	74.5935	97.1135	0.515427	2.3498	0.391634	0.440599	0.109638	0.990133	5.52157
734	801.833	947.047	5	100	0	0	0	1.27279	1	0.580616	16.4447	18.0133	0.165088	0.474125	0.15596	0.467817	0.478417	0.484128	0.337115	270.428	324.479	0.195734	4447.11	5844.94	-0.236111	1.21603	1.25559	1.78714	3.06986	1.62569	-0.671875	-0.740665	0.548539	0.836125	-0.742139	0.670246	0.761982	4.05521	4.24421	9.50235	80.4977	113.095	0.40631	2.22554	0.370923	0.470971	0.163087	0.979024	4.95301
912	997.382	121.836	5	100	0	0	0	0.485782	0	0.192976	9.70965	22.626	0.321509	0.384775	0.279346	0.41591	0.438578	0.486672	0.0372397	94.2773	511.936	0.00718638	915.4	11583.1	-0.714497	0.987204	1.35461	1.21285	1.45999	2.51167	-0.281035	-0.959698	0.19178	0.981438	-0.593058	-0.80516	0.43929	3.11603	4.75668	18.7542	71.2458	88.5923	0.567018	2.32679	0.387798	0.400342	0.0765639	0.965213	5.41395
1132	989.227	136.63	5	100	0	0	0	0.571949	0	0.533874	21.7685	6.42508	0.04905	0.472441	0.0449058	0.43044	0.438956	0.461905	0.285021	473.868	41.2817	0.152166	10315.4	265.238	-0.272561	1.33783	0.807879	1.70553	2.83541	1.15686	0.220814	-0.975316	0.508872	0.860842	0.141419	0.98995	0.730667	4.66567	2.53477	2.81149	87.1885	132.677	0.221472	1.8977	0.316283	0.434698	0.209156	0.904953	3.60126
1056	994.125	121.46	5	100	0	0	0	2.07567	1	0.618623	2.22755	83.4448	0.121578	0.00708472	0.110752	0.0583754	0.4567	0.487646	0.382694	4.96198	6963.03	0.236744	11.0531	581029	-0.208574	0.347827	1.9214	1.85637	2.63354	1.41253	0.791978	-0.610549	0.579914	0.814678	0.981511	-0.191406	0.786526	1.4925	9.13481	6.98318	83.0168	120.284	0.34868	1.24214	0.207023	0.116165	0.209632	0.690564	1.5429
858	984	116.552	5	100	0	0	0	0.606838	0	0.503853	16.8912	57.4658	0.473842	0.259355	0.489152	0.404494	0.38329	0.251066	0.253868	285.313	3302.32	0.127912	4819.27	189770	-0.297696	1.22766	1.75941	1.65509	2.66051	3.94218	-0.925834	-0.37793	0.482803	0.875729	0.793861	0.608099	0.709826	4.10989	7.58062	28.284	61.716	66.4773	0.688362	2.2612	0.376867	0.393892	0.102422	0.951116	5.11302
1088	991.35	123.668	5	100	0	0	0	0.840827	0	0.488487	4.98094	18.7778	0.143164	0.451036	0.128451	0.435344	0.457491	0.49037	0.23862	24.8098	352.606	0.116563	123.576	6621.16	-0.311147	0.697311	1.27364	1.62985	2.43444	1.51349	-0.964156	0.265335	0.46929	0.883044	-0.0716944	0.997427	0.698918	2.2318	4.33334	8.23097	81.769	116.696	0.37837	2.10586	0.350976	0.44319	0.167696	0.937931	4.43463
102	921.443	158.061	5	100	0	0	0	0.639748	0	0.61729	34.6524	26.645	0.248807	0.451503	0.263104	0.49576	0.499194	0.43702	0.381047	1200.79	709.956	0.235216	41610.2	18916.8	-0.209511	1.53973	1.42562	1.8539	3.36347	2.08401	-0.0947385	-0.995502	0.578827	0.81545	0.998287	0.0585041	0.785678	5.88663	5.16188	14.4069	75.5931	99.7336	0.498806	2.39539	0.399231	0.444261	0.113691	1.01042	5.73788
1085	910.149	132.766	5	100	0	0	0	0.724189	0	0.479027	17.8203	47.5011	0.307912	0.395951	0.343752	0.484634	0.483064	0.384782	0.229467	317.563	2256.35	0.109921	5659.07	107179	-0.31964	1.25092	1.6767	1.6145	2.54206	2.46526	-0.856916	0.515457	0.460916	0.887444	-0.368328	-0.929696	0.692118	4.22141	6.8921	17.9334	72.0666	90.6452	0.554898	2.40009	0.400016	0.390367	0.072048	0.992991	5.76046
1086	914.25	122.11	5	100	0	0	0	2.43193	1	0.618624	2.22755	79.0347	0.289653	0.0506871	0.292478	0.160022	0.493477	0.489783	0.382696	4.96198	6246.48	0.236745	11.0531	493689	-0.208573	0.347827	1.89782	1.85637	2.63354	2.15218	0.791978	-0.610549	0.579915	0.814677	-0.474929	-0.880024	0.786527	1.4925	8.89015	16.8372	73.1628	93.4239	0.538194	1.7761	0.296017	0.291065	0.176222	0.825243	3.15453
750	950.496	133.766	5	100	0	0	0	0.615405	0	0.605121	58.7884	24.2955	0.152103	0.483588	0.156717	0.482893	0.48827	0.448733	0.366171	3456.08	590.271	0.221578	203177	14340.9	-0.218158	1.76929	1.38553	1.83147	3.31319	1.57193	0.784482	-0.620152	0.568862	0.822433	-0.742799	0.669515	0.777895	7.66736	4.92905	8.74882	81.2512	115.222	0.390004	2.2123	0.368717	0.465813	0.166609	0.976989	4.89429
543	921.097	103.642	5	100	0	0	0	0.71417	0	0.611492	27.0992	34.2594	0.453303	0.340006	0.426109	0.433972	0.385105	0.374904	0.373922	734.367	1173.71	0.228651	19900.7	40210.5	-0.213609	1.43296	1.53478	1.84318	3.30685	3.74474	0.922741	-0.38542	0.57409	0.818792	0.293723	-0.955891	0.78198	5.20569	5.85315	26.9558	63.0442	69.3694	0.673278	2.4134	0.402233	0.405607	0.0426568	0.989872	5.82449
435	953.227	101.059	5	100	0	0	0	0.667947	0	0.523643	23.6267	14.6333	0.209475	0.441768	0.188675	0.445036	0.466849	0.497193	0.274202	558.221	214.133	0.143584	13188.9	3133.48	-0.280965	1.3734	1.16534	1.68817	2.78592	1.84815	-0.997904	0.0647099	0.500038	0.866003	0.87943	-0.476028	0.723632	4.86073	3.82535	12.0916	77.9084	105.937	0.457684	2.249	0.374833	0.443402	0.137729	0.968423	5.05798
1052	918.3	122.11	5	100	0	0	0	1.01461	1	0.421849	3.52206	79.8891	0.227568	0.0322487	0.259704	0.134177	0.482972	0.491451	0.177957	12.4049	6382.27	0.0750708	43.6908	509874	-0.374843	0.546797	1.90249	1.52478	2.12433	1.89564	-0.371354	-0.928491	0.409448	0.912333	-0.975566	-0.219706	0.649499	1.87672	8.93807	13.1539	76.8461	103.067	0.477041	1.62812	0.271353	0.243636	0.185077	0.782983	2.65078
1376	903.167	147.513	5	100	0	0	0	1.57977	1	0.578957	4.72534	59.1359	0.454608	0.178141	0.469832	0.326131	0.449923	0.357852	0.335191	22.3288	3497.05	0.194061	105.511	206801	-0.237354	0.674433	1.77185	1.78418	2.80535	3.43998	-0.999916	0.0129507	0.547151	0.837034	0.5264	-0.850237	0.760892	2.17378	7.68999	27.0397	62.9603	69.1848	0.674246	2.23649	0.372748	0.403888	0.111668	0.94657	5.00187
1336	907.5	143.76	5	100	0	0	0	1.74555	1	0.786435	2.72818	79.1841	0.264907	0.034722	0.236115	0.127994	0.494904	0.497776	0.61848	7.44297	6270.12	0.486394	20.3058	496494	-0.104337	0.435873	1.89864	2.19556	3.39031	2.05892	0.401737	-0.915755	0.70784	0.706373	-0.600626	-0.79953	0.886812	1.65172	8.89854	15.3614	74.6386	97.2308	0.514691	1.65642	0.27607	0.250511	0.189176	0.797637	2.74372
1186	906	128.605	5	100	0	0	0	0.0989117	0	0.618624	2.22755	34.09	0.446422	0.350215	0.426806	0.446786	0.398966	0.378997	0.382696	4.96198	1162.13	0.236745	11.0531	39616.9	-0.208573	0.347827	1.53263	1.85637	2.63354	3.01511	0.791978	-0.610549	0.579915	0.814677	0.450673	-0.892689	0.786527	1.4925	5.83866	26.5144	63.4856	70.3442	0.668148	2.44819	0.408032	0.412886	0.0389773	1.00326	5.99364
1283	907.023	140.65	5	100	0	0	0	0.998038	1	0.396416	5.22406	74.7184	0.330223	0.0730778	0.357149	0.204261	0.485558	0.469516	0.157146	27.2908	5582.84	0.062295	142.569	417141	-0.401849	0.718008	1.87343	1.48649	2.08948	2.52922	-0.871928	0.489635	0.386115	0.922451	-0.628656	0.777684	0.629616	2.28562	8.64398	19.2823	70.7177	87.2838	0.57465	1.91978	0.319964	0.343686	0.158502	0.860161	3.68557
491	802.525	332.52	5	100	0	0	0	0.844761	0	0.53173	25.641	15.1045	0.233785	0.424218	0.206952	0.433003	0.458925	0.498363	0.282737	657.461	228.146	0.15034	16858	3446.03	-0.274309	1.40893	1.17911	1.70187	2.83447	1.98282	0.486657	0.873593	0.507025	0.861931	0.567497	-0.823375	0.729198	5.06369	3.88645	13.52	76.48	102.088	0.483513	2.25525	0.375874	0.428611	0.123471	0.961205	5.08613
1184	769.934	315.99	5	100	0	0	0	0.640646	0	0.609587	43.7362	6.30297	0.0852865	0.455604	0.0763537	0.424156	0.442623	0.476212	0.371596	1912.86	39.7274	0.22652	83661	250.401	-0.214964	1.64084	0.799545	1.83967	3.32814	1.28654	-0.243621	0.969871	0.572529	0.819885	0.0197834	0.999804	0.780761	6.61334	2.51057	4.8925	85.1075	126.419	0.292039	1.96024	0.326706	0.433389	0.191238	0.907348	3.84252
485	739.181	330.228	5	100	0	0	0	0.737802	0	0.280581	28.352	26.3265	0.342957	0.417502	0.325985	0.472697	0.468482	0.461418	0.0787257	803.836	693.085	0.0220889	22790.4	18246.5	-0.551942	1.45258	1.42039	1.3239	1.7431	2.72824	-0.0775881	-0.996986	0.276914	0.960895	0.929759	0.368168	0.529699	5.32466	5.13094	20.0571	69.9429	85.3816	0.585625	2.48904	0.41484	0.43946	0.0655193	1.02665	6.19533
490	782.094	359.181	5	100	0	0	0	0.588012	0	0.602966	51.5469	36.1347	0.450425	0.345367	0.429048	0.442451	0.392629	0.374477	0.363568	2657.08	1305.72	0.219219	136964	47181.7	-0.219707	1.7122	1.55792	1.82753	3.29363	3.75549	0.958421	0.285357	0.567088	0.823657	-0.99998	0.00638444	0.776509	7.17962	6.01121	26.771	63.229	69.7767	0.671137	2.4344	0.405733	0.410838	0.0416698	0.998197	5.92629
303	536.619	324.268	5	100	0	0	0	0.668528	0	0.590157	40.0646	17.5099	0.195043	0.470922	0.185481	0.474951	0.484596	0.485373	0.348285	1605.17	306.597	0.205543	64310.6	5368.48	-0.229032	1.60276	1.24328	1.80427	3.20009	1.77875	0.700505	-0.713648	0.556491	0.830853	-0.973406	0.229088	0.768217	6.32966	4.18448	11.2472	78.7528	108.245	0.441637	2.29637	0.382728	0.472936	0.149217	0.995094	5.2733
1145	564.463	311.236	5	100	0	0	0	0.605597	0	0.565801	26.8232	14.5896	0.24322	0.408155	0.21134	0.417966	0.449676	0.499081	0.320131	719.484	212.856	0.18113	19298.9	3105.49	-0.247336	1.42851	1.16404	1.76086	3.02898	2.03674	0.992849	-0.119377	0.536092	0.844159	0.899386	-0.437155	0.752197	5.17911	3.81963	14.0767	75.9233	100.607	0.493173	2.22944	0.371573	0.41306	0.116617	0.946782	4.97039
420	585.9	325.782	5	100	0	0	0	0.68583	0	0.500885	28.1764	35.2554	0.341282	0.415109	0.356972	0.496616	0.481562	0.416035	0.250886	793.91	1242.94	0.125665	22369.5	43820.5	-0.300262	1.44989	1.54723	1.65018	2.67587	2.72375	0.0977774	-0.995208	0.480202	0.877158	-0.642595	-0.766206	0.707732	5.30814	5.93763	19.955	70.045	85.6311	0.584193	2.50758	0.417929	0.415572	0.0629966	1.03336	6.28794
1450	555.627	331.042	5	100	0	0	0	0.740264	0	0.429731	11.6813	13.2891	0.206213	0.446215	0.186927	0.449071	0.469287	0.496268	0.184669	136.453	176.6	0.0793579	1593.95	2346.86	-0.366803	1.06749	1.1235	1.53684	2.29095	1.81989	-0.77396	0.633235	0.416626	0.909078	0.661434	0.750003	0.655539	3.41779	3.64542	11.9005	78.0995	106.457	0.454107	2.25398	0.375663	0.447643	0.140009	0.971983	5.08043
311	563.406	341.832	5	100	0	0	0	0.75202	0	0.569258	21.3077	30.0392	0.116414	0.483399	0.122365	0.471527	0.477346	0.431384	0.324055	454.018	902.354	0.184471	9674.08	27106	-0.244691	1.32854	1.47769	1.76696	3.03099	1.41342	0.631471	-0.7754	0.539007	0.842301	-0.981227	0.192854	0.754492	4.61603	5.4808	6.68519	83.3148	121.15	0.341195	2.10243	0.350406	0.451456	0.17988	0.947887	4.42023
1432	559.406	325.247	5	100	0	0	0	0.934517	1	0.643288	4.45509	17.4881	0.0688971	0.469104	0.0628635	0.432789	0.444594	0.469287	0.413819	19.8478	305.834	0.266205	88.4239	5348.45	-0.191595	0.648856	1.24274	1.90273	3.07788	1.22477	-0.967081	-0.254469	0.599829	0.800128	-0.978168	0.207815	0.802052	2.11071	4.18188	3.95064	86.0494	129.233	0.262483	1.94753	0.324589	0.438692	0.200903	0.913213	3.79289
382	800.404	401.956	5	100	0	0	0	0.632139	0	0.74341	37.2404	22.6057	0.293337	0.439946	0.276366	0.475422	0.480338	0.481981	0.552658	1386.85	511.018	0.410852	51646.8	11551.9	-0.128772	1.57101	1.35422	2.10309	4.29615	2.36797	-0.442793	0.896624	0.676802	0.736165	-0.576592	-0.817032	0.862212	6.10249	4.75455	17.0578	72.9422	92.8613	0.541606	2.44739	0.407898	0.457684	0.0966926	1.02227	5.98972
381	799.059	445.93	5	100	0	0	0	0.586148	0	0.609101	38.8066	14.2105	0.181696	0.450105	0.164382	0.445669	0.466379	0.494696	0.371004	1505.95	201.938	0.225979	58440.9	2869.64	-0.215311	1.58891	1.15261	1.83878	3.31805	1.70869	0.894579	0.44691	0.57213	0.820163	0.997312	-0.0732673	0.780449	6.22949	3.76968	10.4686	79.5314	110.396	0.426258	2.20293	0.367154	0.447887	0.151439	0.960981	4.85289
370	765.971	426.237	5	100	0	0	0	0.688497	0	0.546385	46.2719	22.6225	0.187488	0.419458	0.162847	0.414649	0.448267	0.497851	0.298537	2141.09	511.778	0.163116	99072.2	11577.7	-0.262501	1.66532	1.35454	1.727	2.94473	1.743	0.752592	-0.658487	0.519602	0.854408	-0.590236	-0.807231	0.739179	6.80235	4.75631	10.8062	79.1938	109.461	0.432999	2.13056	0.355093	0.417053	0.142689	0.926471	4.53929
1506	733.125	407.248	5	100	0	0	0	0.41731	0	0.618621	2.22755	26.8253	0.226704	0.45235	0.24305	0.490567	0.497678	0.430506	0.382692	4.96198	719.597	0.236741	11.0531	19303.4	-0.208575	0.347827	1.42854	1.85637	2.63353	1.8452	0.791978	-0.610549	0.579912	0.814679	0.992596	-0.121462	0.786525	1.4925	5.17931	13.1031	76.8969	103.204	0.476134	2.34085	0.390143	0.441428	0.122879	0.994366	5.4796
1512	766.875	417.641	5	100	0	0	0	1.28778	1	0.618621	2.22755	29.7498	0.14003	0.476842	0.131618	0.462171	0.472937	0.48184	0.382692	4.96198	885.051	0.236741	11.0531	26330.1	-0.208575	0.347827	1.47348	1.85637	2.63353	1.48216	0.791978	-0.610549	0.579912	0.814679	-0.99546	-0.0951859	0.786525	1.4925	5.45434	8.04958	81.9504	117.214	0.374206	2.16544	0.360906	0.467554	0.174488	0.966308	4.68912
380	766.125	422.837	5	100	0	0	0	0.730959	0	0.341195	3.15023	26.9368	0.119709	0.475819	0.11155	0.454478	0.465739	0.479491	0.116414	9.92395	725.591	0.0397199	31.2627	19545.1	-0.466997	0.498342	1.43035	1.40663	1.85096	1.41129	-0.00863724	-0.999963	0.334613	0.942355	0.972917	-0.231153	0.584119	1.77489	5.19007	6.87531	83.1247	120.597	0.34599	2.10679	0.351131	0.460109	0.182644	0.95213	4.43855
437	667.303	371.103	5	100	0	0	0	0.511856	0	0.598513	85.0586	25.7063	0.016416	0.477787	0.0177875	0.428416	0.430319	0.382272	0.358218	7234.97	660.814	0.214398	615396	16987.1	-0.222926	1.92972	1.41004	1.81941	3.28269	1.05044	-0.233425	-0.972375	0.563415	0.826174	0.542625	0.839975	0.773636	9.22272	5.07014	0.94061	89.0594	138.432	0.128125	1.753	0.292166	0.405344	0.215196	0.862388	3.073
1509	705	411.795	5	100	0	0	0	0.554816	0	0.358363	3.15023	79.9975	0.286212	0.0457937	0.272787	0.148494	0.496453	0.493459	0.128424	9.92395	6399.6	0.0460224	31.2627	511952	-0.445677	0.498342	1.90308	1.43098	1.90317	2.19142	-0.00863724	-0.999963	0.350742	0.936472	-0.99361	-0.112872	0.598634	1.77489	8.94413	16.6313	73.3687	93.9505	0.534988	1.7432	0.290533	0.2795	0.181101	0.818807	3.03874
467	664.875	424.136	5	100	0	0	0	2.67569	1	0.618624	2.22755	9.48055	0.0785644	0.463905	0.0711609	0.430413	0.445096	0.473265	0.382696	4.96198	89.8808	0.236745	11.0531	852.12	-0.208573	0.347827	0.976834	1.85637	2.63354	1.25339	0.791978	-0.610549	0.579915	0.814677	-0.0557431	-0.998445	0.786527	1.4925	3.07905	4.50605	85.4939	127.57	0.280293	1.9624	0.327067	0.437754	0.195934	0.913121	3.85103
363	698.066	424.295	5	100	0	0	0	0.508155	0	0.608051	36.2961	25.3399	0.271515	0.451206	0.280838	0.499264	0.498829	0.446721	0.369726	1317.41	642.111	0.224812	47816.7	16271	-0.21606	1.55986	1.4038	1.83685	3.30708	2.22552	-0.985957	0.166998	0.571269	0.820763	0.20568	0.978619	0.779776	6.02462	5.03388	15.7544	74.2456	96.2096	0.521071	2.44837	0.408062	0.448963	0.104636	1.02656	5.99453
359	676.358	418.143	5	100	0	0	0	0.644498	0	0.412192	18.0967	28.085	0.129993	0.449723	0.145104	0.453945	0.472206	0.398119	0.169902	327.491	788.767	0.0700323	5926.5	22152.5	-0.3849	1.2576	1.44847	1.51012	2.23899	1.47024	-0.683726	0.729739	0.400619	0.916245	0.188205	-0.98213	0.642022	4.25402	5.29953	7.46919	82.5308	118.88	0.360545	2.04909	0.341515	0.423921	0.15997	0.909806	4.19877
681	315	937.905	5	100	0	0	0	0.743342	0	0.45322	2.72818	85.671	0.101758	0.00603292	0.112423	0.0522937	0.452038	0.481739	0.205408	7.44297	7339.52	0.0930952	20.3058	628784	-0.343691	0.435873	1.93283	1.57337	2.17561	1.34173	0.401737	-0.915755	0.437863	0.899042	-0.749958	-0.661486	0.673216	1.65172	9.25586	5.84041	84.1596	123.619	0.318995	1.20628	0.201047	0.107091	0.209597	0.679835	1.45512
958	312.912	981.183	5	100	0	0	0	0.475525	0	0.438092	69.322	24.0926	0.0859077	0.489663	0.0895728	0.46469	0.467778	0.428251	0.191925	4805.54	580.453	0.0840806	333130	13984.6	-0.358435	1.84087	1.38188	1.54975	2.38854	1.29239	0.205487	0.97866	0.424212	0.905563	-0.862476	0.506098	0.661885	8.32598	4.90842	4.92822	85.0718	126.313	0.2931	2.02586	0.337644	0.44647	0.194579	0.934519	4.10412
822	334.592	951.815	5	100	0	0	0	0.751466	0	0.208218	10.0856	57.6133	0.449178	0.146436	0.430335	0.26853	0.470281	0.391646	0.0433547	101.719	3319.29	0.00902724	1025.9	191235	-0.681482	1.0037	1.76052	1.23148	1.50383	3.59851	-0.613766	-0.789488	0.206717	0.978401	0.874611	0.484826	0.456309	3.17578	7.59034	26.691	63.309	69.9534	0.670207	2.15641	0.359401	0.410991	0.126521	0.92469	4.65009
426	332.031	935.897	5	100	0	0	0	0.625356	0	0.4295	35.8835	30.1463	0.0933247	0.46587	0.10238	0.450637	0.463163	0.401016	0.18447	1287.63	908.799	0.07923	46204.5	27396.9	-0.367037	1.55489	1.47923	1.53649	2.33693	1.321	-0.970182	-0.242377	0.416416	0.909174	-0.95499	0.296638	0.655362	5.99028	5.49056	5.3549	84.6451	125.049	0.305491	1.97639	0.329398	0.425826	0.180894	0.902571	3.90612
707	319.5	939.205	5	100	0	0	0	0.432957	0	0.618624	2.22755	84.8666	0.113687	0.0074456	0.12274	0.0584141	0.456493	0.484788	0.382696	4.96198	7202.34	0.236745	11.0531	611238	-0.208573	0.347827	1.92874	1.85637	2.63354	1.38277	0.791978	-0.610549	0.579915	0.814677	-0.0435845	-0.99905	0.786527	1.4925	9.21231	6.5279	83.4721	121.607	0.337175	1.24357	0.207261	0.118213	0.208384	0.689103	1.54646
821	323.592	953.658	5	100	0	0	0	0.503428	0	0.315698	19.7988	43.3025	0.304772	0.435104	0.286512	0.474036	0.477883	0.480254	0.0996652	391.992	1875.11	0.0314641	7760.98	81196.8	-0.500728	1.29664	1.63651	1.37122	1.86169	2.44552	0.812976	0.582298	0.31048	0.95058	-0.628635	0.7777	0.56187	4.44958	6.58046	17.7444	72.2556	91.1213	0.552062	2.45856	0.40976	0.45457	0.0901071	1.02373	6.04452
1455	375.844	996.432	5	100	0	0	0	0.540576	0	0.313295	11.7871	38.2065	0.364638	0.381103	0.396747	0.488022	0.465374	0.374188	0.0981538	138.936	1459.74	0.0307511	1637.65	55771.4	-0.504047	1.07141	1.58214	1.36793	1.84111	2.86153	-0.702761	0.711426	0.308195	0.951323	0.485896	0.874017	0.559728	3.43323	6.18114	21.3853	68.6147	82.1697	0.603853	2.47007	0.411679	0.388925	0.0519378	1.01507	6.10126
1016	375.05	974.257	5	100	0	0	0	0.609101	0	0.571857	31.6985	10.9986	0.0899086	0.476123	0.083299	0.445748	0.45588	0.472945	0.32702	1004.79	120.969	0.187009	31850.5	1330.49	-0.242713	1.50104	1.04134	1.77155	3.07544	1.30576	0.278828	0.960341	0.541195	0.840897	-0.999995	0.00302571	0.756212	5.63014	3.31641	5.15835	84.8417	125.631	0.299848	2.0239	0.337317	0.450814	0.194532	0.933761	4.09619
746	355.875	942.452	5	100	0	0	0	1.55255	1	0.618611	2.22755	75.4118	0.488811	0.216554	0.466358	0.341114	0.414867	0.312556	0.38268	4.96198	5686.94	0.23673	11.0531	428862	-0.208582	0.347827	1.87744	1.85635	2.6335	3.30749	0.791978	-0.610549	0.579904	0.814685	0.0135759	0.999908	0.786518	1.4925	8.684	29.2625	60.7375	64.386	0.69915	2.24026	0.373377	0.377991	0.102981	0.943126	5.01876
590	365.236	950.964	5	100	0	0	0	0.738299	0	0.679321	30.906	42.9923	0.37241	0.348336	0.419795	0.474225	0.44704	0.335219	0.461477	955.181	1848.34	0.313491	29520.8	79464.3	-0.167925	1.49004	1.63339	1.97254	3.77885	2.98787	-0.488113	0.87278	0.628265	0.777999	-0.836024	0.548692	0.824209	5.55932	6.55685	21.8643	68.1357	81.0264	0.610254	2.39702	0.399504	0.396103	0.056106	0.986591	5.74573
867	344.111	954.812	5	100	0	0	0	0.580819	0	0.358806	13.1783	43.8478	0.320927	0.429672	0.302695	0.474826	0.475363	0.474798	0.128742	173.668	1922.63	0.0461933	2288.64	84303.1	-0.44514	1.11986	1.64195	1.43162	2.01092	2.54269	0.574448	0.818541	0.351157	0.936317	-0.134092	0.990969	0.599004	3.63019	6.62177	18.719	71.281	88.6799	0.566504	2.47828	0.413047	0.452235	0.0805645	1.02767	6.14188
296	196.957	820.388	5	100	0	0	0	0.541091	0	0.719721	45.2968	19.7805	0.0629917	0.496083	0.0643692	0.460602	0.459881	0.431313	0.517998	2051.8	391.268	0.372814	92940	7739.48	-0.142836	1.65607	1.29624	2.05386	4.12443	1.20697	0.967336	0.253497	0.659175	0.75199	0.802184	0.597077	0.848364	6.73029	4.44753	3.61155	86.3885	130.253	0.250981	1.97524	0.329207	0.445597	0.206699	0.929454	3.90157
669	196.466	789.062	5	100	0	0	0	0.561301	0	0.600509	27.5982	13.8566	0.140949	0.484774	0.135844	0.472181	0.479132	0.47488	0.360611	761.661	192.005	0.21655	21020.5	2660.54	-0.22148	1.44088	1.14166	1.82305	3.23957	1.51662	0.625782	-0.779998	0.565062	0.825048	0.960899	0.2769	0.774925	5.2534	3.72245	8.10276	81.8972	117.062	0.375432	2.18776	0.364627	0.473531	0.175296	0.975377	4.78629
509	221.148	782.924	5	100	0	0	0	0.521981	0	0.602267	33.8557	29.3194	0.0156748	0.4655	0.0173414	0.417557	0.424522	0.369323	0.362726	1146.21	859.627	0.218458	38805.7	25203.8	-0.220211	1.52963	1.46716	1.82625	3.26572	1.0481	0.645608	-0.763669	0.566512	0.824053	-0.864958	-0.501845	0.776059	5.81857	5.41474	0.898137	89.1019	138.564	0.125199	1.70992	0.284986	0.39344	0.210193	0.841552	2.92382
1234	220.841	813.552	5	100	0	0	0	0.622289	0	0.593454	5.22406	41.7354	0.465516	0.323929	0.43266	0.419377	0.363775	0.359032	0.352188	27.2908	1741.84	0.209007	142.569	72696.5	-0.226613	0.718008	1.6205	1.81023	2.90325	3.55831	-0.871928	0.489635	0.559228	0.829014	-0.780019	-0.625756	0.77036	2.28562	6.46029	27.7436	62.2564	67.6465	0.682287	2.36429	0.394048	0.391576	0.0534778	0.972596	5.58986
1024	230.643	806.881	5	100	0	0	0	0.481022	0	0.648139	17.5397	26.3681	0.386662	0.364829	0.340441	0.417435	0.419481	0.456706	0.420084	307.641	695.277	0.272273	5395.93	18333.1	-0.188332	1.24402	1.42108	1.91198	3.49064	3.06152	-0.966148	0.257989	0.603704	0.797209	0.944266	0.329182	0.805071	4.18804	5.13499	22.747	67.253	78.9407	0.621822	2.38555	0.397592	0.402049	0.0420154	0.978419	5.69087
1135	220.563	805.729	5	100	0	0	0	0.568135	0	0.682725	7.71645	29.0714	0.321881	0.429579	0.333354	0.499271	0.49005	0.432411	0.466113	59.5436	845.146	0.318227	459.465	24569.6	-0.165754	0.887418	1.46347	1.97926	3.50594	2.50234	0.990557	0.137098	0.63091	0.775856	-0.715309	-0.698808	0.826272	2.77785	5.39179	18.7767	71.2233	88.5363	0.567346	2.50655	0.417758	0.430995	0.0755531	1.03715	6.28277
388	987.723	833.661	5	100	0	0	0	0.722288	0	0.310085	42.4116	13.7608	0.205803	0.424974	0.180756	0.425493	0.455055	0.498801	0.0961527	1798.74	189.36	0.0298155	76287.6	2605.74	-0.508519	1.62748	1.13864	1.36354	1.85089	1.83202	-1	9.91765e-05	0.30514	0.952308	0.930006	0.367544	0.556853	6.51242	3.70956	11.8765	78.1235	106.522	0.453655	2.19088	0.365147	0.425234	0.136058	0.94475	4.79996
861	996.709	789.166	5	100	0	0	0	1.03317	1	0.317208	9.45068	13.072	0.194214	0.455178	0.177977	0.455334	0.472648	0.493827	0.100621	89.3154	170.877	0.0319178	844.091	2233.71	-0.498656	0.975463	1.11634	1.37329	1.84746	1.75544	-0.0258991	-0.999665	0.311915	0.95011	0.484358	0.87487	0.563212	3.0742	3.61552	11.1988	78.8012	108.378	0.440697	2.24918	0.374863	0.455256	0.146996	0.975281	5.0588
908	974.25	789.444	5	100	0	0	0	1.25653	1	0.379239	5.89353	41.1889	0.199418	0.451712	0.216986	0.481605	0.492905	0.421382	0.143822	34.7337	1696.53	0.054543	204.704	69878	-0.421087	0.770375	1.61478	1.46117	2.03933	1.77887	-0.37987	0.92504	0.370214	0.928947	-0.341202	-0.93999	0.615824	2.42766	6.41786	11.5029	78.4971	107.544	0.446562	2.26401	0.377335	0.436547	0.133467	0.971265	5.12573
941	982.812	798.271	5	100	0	0	0	0.577918	0	0.612555	24.2997	30.8685	0.428823	0.362646	0.399871	0.444092	0.412915	0.410997	0.375224	590.475	952.864	0.229845	14348.4	29413.5	-0.212855	1.3856	1.48952	1.84514	3.30351	3.48036	-0.73998	0.672628	0.57496	0.818182	-0.520492	0.853867	0.782659	4.92947	5.55594	25.3929	64.6071	72.8514	0.654846	2.45934	0.409891	0.411956	0.0278244	1.00595	6.04837
396	956.136	757.602	5	100	0	0	0	0.60367	0	0.636291	13.9999	28.8572	0.0619677	0.443058	0.0704919	0.419277	0.439861	0.368521	0.404866	195.997	832.738	0.257613	2743.94	24030.5	-0.196344	1.14612	1.46025	1.88946	3.37791	1.20284	0.990594	0.136836	0.594216	0.804305	-0.550419	-0.834889	0.797679	3.74164	5.37189	3.55276	86.4472	130.431	0.248933	1.80318	0.300529	0.393899	0.183456	0.842727	3.25145
376	892.424	694.026	5	100	0	0	0	0.488578	0	0.536073	49.2839	29.5083	0.256379	0.435865	0.278404	0.490861	0.496243	0.418983	0.287374	2428.9	870.74	0.154054	119706	25694.1	-0.270776	1.69271	1.46994	1.70928	2.88813	2.13528	-0.831378	0.555708	0.510764	0.859721	-0.943807	-0.330497	0.73217	7.02025	5.43215	14.8553	75.1447	98.5539	0.506339	2.37674	0.396122	0.427424	0.104391	0.997981	5.64887
627	959.07	709.317	5	100	0	0	0	0.535555	0	0.418006	51.3056	22.5569	0.0908355	0.489015	0.0947563	0.466023	0.469545	0.42942	0.174729	2632.26	508.814	0.0730378	135050	11477.3	-0.378817	1.71016	1.35328	1.51893	2.29161	1.31119	0.862464	0.506119	0.405939	0.9139	-0.53605	-0.844186	0.646534	7.16279	4.74941	5.21167	84.7883	125.473	0.301389	2.03959	0.339932	0.447721	0.192402	0.937239	4.15995
971	915.686	722.113	5	100	0	0	0	0.620332	0	0.568005	31.7766	15.9548	0.224255	0.460634	0.210977	0.472903	0.48386	0.489468	0.32263	1009.75	254.556	0.183255	32086.5	4061.38	-0.245648	1.50211	1.20289	1.76474	3.0528	1.93258	0.352904	0.935659	0.537951	0.842976	-0.244338	-0.96969	0.753661	5.63707	3.99435	12.9591	77.0409	103.591	0.473556	2.3421	0.390349	0.466769	0.134228	1.00216	5.48542
383	924.774	692.584	5	100	0	0	0	0.888507	0	0.461527	23.2563	40.717	0.344263	0.379709	0.382207	0.484531	0.470146	0.370252	0.213007	540.855	1657.87	0.0983086	12578.3	67503.7	-0.335803	1.36654	1.60978	1.58649	2.47216	2.74372	-0.953653	-0.300908	0.445316	0.895374	0.123389	-0.992358	0.679358	4.82248	6.38099	20.1368	69.8632	85.1872	0.586739	2.43111	0.405185	0.380958	0.057662	1.00084	5.91029
1367	924.618	578.115	5	100	0	0	0	0.612571	0	0.215999	25.7376	77.5142	0.214583	0.0233096	0.197242	0.105459	0.485509	0.49939	0.0466556	662.424	6008.45	0.0100776	17049.2	465740	-0.665548	1.41057	1.88938	1.2411	1.5348	1.89019	0.568646	0.822582	0.214323	0.976763	0.855034	-0.518572	0.464757	5.07322	8.80421	12.3911	77.6089	105.124	0.463231	1.52549	0.254249	0.205912	0.196911	0.762709	2.32713
539	944.625	595.609	5	100	0	0	0	1.59939	1	0.341192	3.15023	13.5624	0.0635488	0.496259	0.062374	0.45887	0.458359	0.448914	0.116412	9.92395	183.939	0.0397188	31.2627	2494.65	-0.467001	0.498342	1.13234	1.40662	1.85095	1.20445	-0.00863724	-0.999963	0.334611	0.942356	0.839319	0.543639	0.584116	1.77489	3.68272	3.64353	86.3565	130.157	0.252089	1.98832	0.331387	0.453636	0.208554	0.936152	3.95344
1341	940.75	564.216	5	100	0	0	0	0.854406	0	0.436291	2.72818	83.6135	0.124786	0.00897542	0.1339	0.0644929	0.46054	0.487177	0.19035	7.44297	6991.22	0.0830479	20.3058	584560	-0.360224	0.435873	1.92228	1.54696	2.12183	1.42971	0.401737	-0.915755	0.422581	0.906325	0.93544	-0.353486	0.660523	1.65172	9.14404	7.1684	82.8316	119.748	0.353251	1.27987	0.213312	0.129343	0.206963	0.697982	1.63807
327	905.25	593.424	5	100	0	0	0	1.42171	1	0.558187	5.22406	64.0144	0.34889	0.422632	0.347854	0.492249	0.478664	0.44183	0.311573	27.2908	4097.84	0.173916	142.569	262321	-0.25322	0.718008	1.80628	1.7475	2.74177	2.65424	-0.871928	0.489635	0.529649	0.848217	0.925573	0.378569	0.747119	2.28562	8.0009	20.4194	69.5806	84.4993	0.590669	2.53212	0.42202	0.432231	0.0622608	1.04307	6.41163
1383	893.5	568.546	5	100	0	0	0	0.775165	0	0.413907	3.85822	76.1184	0.248976	0.0363487	0.25252	0.134592	0.490971	0.496161	0.171319	14.8859	5794.01	0.0709101	57.4329	441031	-0.383097	0.586387	1.88149	1.51272	2.11195	2.01275	-0.656845	-0.754025	0.402189	0.915556	0.659517	0.751689	0.643356	1.96424	8.72459	14.4169	75.5831	99.7072	0.498975	1.65957	0.276595	0.250748	0.186221	0.795248	2.75417
1153	924.268	562.367	5	100	0	0	0	1.01225	1	0.425446	35.291	34.3942	0.105058	0.476233	0.11268	0.462655	0.470971	0.416934	0.181004	1245.45	1182.96	0.0770076	43953.3	40687	-0.371156	1.54766	1.53649	1.53027	2.31812	1.36791	-0.669459	-0.742849	0.412727	0.910855	0.162594	-0.986693	0.652262	5.94062	5.86466	6.03051	83.9695	123.061	0.324127	2.04453	0.340755	0.439794	0.180856	0.927485	4.18011
326	918.857	590.125	5	100	0	0	0	0.983953	1	0.422267	31.4235	35.6375	0.122664	0.469051	0.132725	0.464365	0.475048	0.415034	0.178309	987.436	1270.03	0.0752942	31028.7	45260.7	-0.374413	1.49725	1.55191	1.52542	2.30098	1.44096	0.00757339	0.999971	0.409829	0.912162	-0.881949	-0.471345	0.649821	5.60567	5.96972	7.04587	82.9541	120.103	0.350234	2.07889	0.346481	0.4397	0.170842	0.930715	4.32177
471	833.197	929.833	5	100	0	0	0	0.864033	0	0.536	8.33472	16.2008	0.262391	0.422897	0.234198	0.440579	0.462333	0.496724	0.287296	69.4676	262.466	0.153991	578.993	4252.16	-0.270835	0.920891	1.20954	1.70916	2.738	2.11986	0.886654	-0.462434	0.510701	0.859758	-0.473127	-0.880994	0.73212	2.88699	4.02502	15.212	74.788	97.6206	0.512241	2.31912	0.38652	0.431738	0.110225	0.978333	5.37833
551	856.5	931.41	5	100	0	0	0	0.724157	0	0.618624	2.22755	74.5558	0.289644	0.0427439	0.259696	0.141228	0.497835	0.494131	0.382696	4.96198	5558.57	0.236745	11.0531	414423	-0.208573	0.347827	1.87248	1.85637	2.63354	2.15182	0.791978	-0.610549	0.579915	0.814677	-0.746259	0.665656	0.786527	1.4925	8.63457	16.8366	73.1634	93.4253	0.538186	1.72528	0.287546	0.27467	0.183856	0.815545	2.97658
1487	841.286	920.368	5	100	0	0	0	0.870822	0	0.26461	8.33472	89.2933	0.337299	0.0659204	0.319104	0.177184	0.498227	0.479249	0.0700185	69.4676	7973.29	0.0185276	578.993	711962	-0.577394	0.920891	1.95082	1.30292	1.67019	2.63536	0.886654	-0.462434	0.261533	0.965195	0.970839	0.239733	0.514403	2.88699	9.44951	19.7124	70.2876	86.2253	0.580774	1.87698	0.312831	0.328202	0.168564	0.85396	3.52307
1472	849.375	916.471	5	100	0	0	0	0.741615	0	0.322253	3.85822	88.3189	0.358176	0.0724272	0.327949	0.181712	0.498784	0.471853	0.103847	14.8859	7800.23	0.033465	57.4329	688908	-0.491803	0.586387	1.94605	1.38023	1.81271	2.66343	-0.656845	-0.754025	0.316704	0.948524	0.346939	0.937888	0.567673	1.96424	9.39781	20.9882	69.0118	83.1235	0.598478	1.9109	0.318484	0.343062	0.165497	0.863444	3.65154
1488	855.024	920.431	5	100	0	0	0	1.12814	1	0.403978	8.76986	88.7879	0.193107	0.022343	0.20899	0.105741	0.479983	0.494796	0.163198	76.9104	7883.29	0.0659285	674.494	699941	-0.393642	0.942993	1.94835	1.49777	2.16491	1.76057	0.609094	-0.793098	0.393079	0.919505	0.733397	0.679801	0.635593	2.96139	9.42273	11.1342	78.8658	108.556	0.439439	1.50496	0.250827	0.201049	0.195126	0.753561	2.2649
472	850.663	926.158	5	100	0	0	0	1.12063	1	0.191267	10.6829	29.0642	0.142158	0.477998	0.150064	0.477216	0.484572	0.434036	0.0365831	114.124	844.728	0.00699713	1219.18	24551.3	-0.71836	1.02869	1.46336	1.21078	1.45616	1.52021	-0.951514	-0.307604	0.190103	0.981764	-0.710259	-0.70394	0.437341	3.26847	5.39112	8.17274	81.8273	116.862	0.377038	2.16604	0.361007	0.455626	0.167442	0.960283	4.69175
1031	729.918	878.262	5	100	0	0	0	0.769151	0	0.735465	11.9957	40.0987	0.287462	0.430032	0.308651	0.495735	0.49476	0.420021	0.540909	143.897	1607.91	0.397819	1726.14	64474.9	-0.133438	1.07903	1.60313	2.08645	3.99865	2.30792	-0.540197	0.841539	0.670932	0.741519	0.675767	-0.737115	0.857593	3.46348	6.33235	16.7061	73.2939	93.7591	0.536155	2.43666	0.40611	0.425026	0.0897027	1.01478	5.93732
1349	727.125	899.584	5	100	0	0	0	0.731417	0	0.618601	2.22755	49.6726	0.43433	0.262664	0.492282	0.428547	0.352675	0.214243	0.382667	4.96198	2467.37	0.236718	11.0531	122561	-0.208589	0.347827	1.69612	1.85633	2.63346	2.95195	0.791978	-0.610549	0.579896	0.814691	-0.558754	0.829334	0.786512	1.4925	7.04788	25.7427	64.2573	72.0647	0.659037	2.18474	0.364124	0.390611	0.108068	0.924072	4.77309
1144	690.629	983.541	5	100	0	0	0	0.789282	0	0.346147	21.8254	36.9276	0.275105	0.391251	0.31477	0.472307	0.482629	0.376536	0.119818	476.348	1363.65	0.0414746	10396.5	50356.2	-0.460739	1.33896	1.56735	1.41361	1.97681	2.24586	0.164991	-0.986295	0.339276	0.940687	-0.69722	0.716857	0.588343	4.67177	6.07681	15.9683	74.0317	95.6562	0.524505	2.3126	0.385433	0.383893	0.0827921	0.962094	5.34811
1299	669.514	990.328	5	100	0	0	0	0.652268	0	0.444911	28.7432	41.7896	0.199734	0.413075	0.229412	0.457482	0.480867	0.384405	0.197946	826.172	1746.37	0.0880683	23746.8	72980.1	-0.351727	1.45854	1.62107	1.56035	2.4019	1.80806	-0.451875	-0.892081	0.430378	0.902649	-0.812773	-0.582581	0.667016	5.36127	6.46449	11.5214	78.4786	107.493	0.446916	2.16498	0.360829	0.39874	0.11854	0.922738	4.68712
1437	645	995.407	5	100	0	0	0	0.438867	0	0.594512	12.9887	44.5004	0.39412	0.313246	0.451907	0.459207	0.415639	0.292051	0.353445	168.706	1980.29	0.210127	2191.28	88123.5	-0.225839	1.11357	1.64836	1.81215	3.11735	3.11977	0.409886	0.912137	0.560105	0.828422	0.495233	0.86876	0.771046	3.60398	6.67086	23.2111	66.7889	77.8549	0.62779	2.32617	0.387695	0.40488	0.0703558	0.962598	5.41107
998	750.273	981.283	5	100	0	0	0	0.700415	0	0.3203	42.963	23.287	0.0280315	0.497064	0.0288	0.448935	0.444264	0.416583	0.102592	1845.82	542.284	0.0328602	79301.9	12628.2	-0.494443	1.63309	1.36711	1.37754	1.88864	1.08756	-0.85174	0.523965	0.314851	0.949141	-0.96244	-0.271494	0.565951	6.55462	4.82566	1.6063	88.3937	136.37	0.167426	1.86368	0.310613	0.430423	0.220118	0.906169	3.47329
597	688.461	870.349	5	100	0	0	0	0.688842	0	0.184138	22.934	25.6829	0.322855	0.429613	0.307913	0.478118	0.476832	0.469753	0.0339068	525.968	659.611	0.00624353	12062.6	16940.7	-0.734857	1.36048	1.40964	1.20218	1.44101	2.56876	-0.809237	-0.587483	0.183099	0.983094	0.522823	0.852442	0.429113	4.78895	5.06783	18.8357	71.1643	88.3898	0.568203	2.48508	0.414181	0.449683	0.0787055	1.02968	6.17564
740	707.234	873.813	5	100	0	0	0	0.517293	0	0.561233	26.2623	22.8199	0.0766793	0.495182	0.0783051	0.464722	0.465307	0.436088	0.314982	689.708	520.748	0.176779	18113.3	11883.4	-0.250857	1.41933	1.35831	1.75283	3.0011	1.25684	0.904224	0.427059	0.53223	0.8466	-0.737088	-0.675797	0.749155	5.12468	4.77702	4.39772	85.6023	127.893	0.27691	2.01628	0.336047	0.450405	0.201147	0.938012	4.0654
1220	700.5	885.944	5	100	0	0	0	1.42392	1	0.45322	2.72818	89.0144	0.21093	0.0271463	0.233925	0.119491	0.48269	0.494155	0.205408	7.44297	7923.56	0.0930952	20.3058	705311	-0.343691	0.435873	1.94946	1.57337	2.17561	1.79694	0.401737	-0.915755	0.437863	0.899042	0.867327	0.49774	0.673216	1.65172	9.43474	12.1769	77.8231	105.705	0.459271	1.56834	0.26139	0.222428	0.190504	0.769029	2.45968
1179	694.875	883.995	5	100	0	0	0	1.23875	1	0.618611	2.22755	36.4582	0.298757	0.41491	0.326663	0.49175	0.49024	0.40425	0.38268	4.96198	1329.2	0.23673	11.0531	48460.3	-0.208582	0.347827	1.5618	1.85635	2.6335	2.19155	0.791978	-0.610549	0.579904	0.814685	-0.94608	0.323934	0.786518	1.4925	6.03806	17.383	72.617	92.0353	0.546587	2.42657	0.404428	0.40958	0.0803897	1.00682	5.88824
1072	696	880.748	5	100	0	0	0	1.46223	1	0.24635	5.45635	16.9454	0.101824	0.482263	0.0958828	0.455814	0.463807	0.472664	0.0606883	29.7718	287.147	0.0149506	162.445	4865.81	-0.608447	0.736902	1.22905	1.27935	1.60226	1.34732	-0.735792	0.677208	0.243866	0.969809	-0.944948	-0.32722	0.496337	2.33588	4.11648	5.84421	84.1558	123.608	0.319099	2.07225	0.345376	0.459811	0.191169	0.947857	4.29424
1063	843.793	815.759	5	100	0	0	0	0.571819	0	0.677132	37.3737	32.0467	0.223709	0.449748	0.241387	0.488324	0.496519	0.426367	0.458508	1396.79	1026.99	0.31047	52203.3	32911.7	-0.169327	1.57257	1.50578	1.96822	3.78166	1.93971	-0.319699	0.947519	0.62656	0.779373	0.58977	0.807572	0.82288	6.1134	5.66098	12.927	77.073	103.677	0.472979	2.32605	0.387676	0.438057	0.122973	0.988619	5.41053
1232	862.125	809.95	5	100	0	0	0	0.804799	0	0.618611	2.22755	61.9026	0.432626	0.244998	0.496441	0.417147	0.363982	0.204677	0.38268	4.96198	3831.93	0.23673	11.0531	237207	-0.208582	0.347827	1.79171	1.85635	2.6335	2.94609	0.791978	-0.610549	0.579904	0.814685	-0.801173	0.598433	0.786518	1.4925	7.86782	25.6343	64.3657	72.3079	0.657743	2.15987	0.359978	0.390564	0.113598	0.917622	4.66504
358	839.552	843.404	5	100	0	0	0	0.635421	0	0.663316	28.2206	34.5955	0.45545	0.336477	0.424455	0.4285	0.380475	0.375554	0.439988	796.402	1196.85	0.291851	22474.9	41405.6	-0.17828	1.45057	1.53902	1.94122	3.65526	3.77142	0.053708	-0.998557	0.615733	0.787955	-0.0379717	-0.999279	0.814442	5.31231	5.88179	27.0939	62.9061	69.0658	0.67487	2.40091	0.400152	0.402465	0.0435864	0.985001	5.76437
364	864.305	861.582	5	100	0	0	0	0.629958	0	0.711516	38.3887	34.3193	0.453844	0.339093	0.425485	0.432403	0.383926	0.375411	0.506255	1473.69	1177.81	0.360209	56573.1	40421.8	-0.147815	1.5842	1.53554	2.03708	4.04361	3.77448	0.636219	0.771508	0.652983	0.757373	0.235972	-0.97176	0.843514	6.19586	5.85827	26.9906	63.0094	69.2928	0.673679	2.41016	0.401694	0.404705	0.042788	0.988585	5.80888
368	883.116	827.243	5	100	0	0	0	0.831415	0	0.57792	49.9582	31.5005	0.441362	0.322985	0.385346	0.391362	0.370891	0.408003	0.333992	2495.82	992.282	0.19302	124687	31257.4	-0.238132	1.69861	1.49832	1.78233	3.13498	3.64921	-0.30247	0.953159	0.546283	0.837601	0.0844727	0.996426	0.76021	7.06811	5.61253	26.1908	63.8092	71.063	0.664351	2.31995	0.386658	0.388354	0.0394331	0.951211	5.38216
1478	856.583	841.632	5	100	0	0	0	0.577261	0	0.466134	4.72534	25.8207	0.269055	0.449982	0.280326	0.498924	0.499088	0.443074	0.217281	22.3288	666.709	0.101282	105.511	17214.9	-0.331489	0.674433	1.41197	1.59382	2.33628	2.13022	-0.999916	0.0129507	0.449436	0.893312	0.634962	0.772544	0.68274	2.17378	5.08141	15.608	74.392	96.5894	0.518705	2.44045	0.406742	0.446528	0.105027	1.02361	5.95579
322	790.186	614.465	5	100	0	0	0	0.630985	0	0.587745	52.6904	32.6136	0.0601995	0.434344	0.069199	0.411364	0.435052	0.360518	0.345444	2776.28	1063.65	0.203033	146283	34689.4	-0.230811	1.72173	1.5134	1.79993	3.19799	1.19729	0.656881	-0.753994	0.554486	0.832193	0.931194	0.364525	0.766645	7.25882	5.71083	3.45126	86.5487	130.737	0.245356	1.77068	0.295113	0.385941	0.180545	0.827968	3.1353
982	808.459	649.234	5	100	0	0	0	0.628378	0	0.627624	41.6137	23.0386	0.0458265	0.488931	0.0483269	0.449295	0.44979	0.409228	0.393912	1731.7	530.777	0.247229	72062.4	12228.4	-0.2023	1.61924	1.36246	1.87315	3.44388	1.14689	-0.698283	-0.715822	0.587223	0.809425	-0.866152	-0.49978	0.792227	6.45087	4.79985	2.62658	87.3734	133.24	0.214071	1.8914	0.315233	0.429261	0.209238	0.902848	3.57738
1251	761.672	652.786	5	100	0	0	0	1.079	1	0.548368	22.7166	16.8459	0.2411	0.453931	0.226169	0.47144	0.481615	0.48831	0.300707	516.044	283.784	0.164898	11722.8	4780.6	-0.260928	1.35634	1.22649	1.73043	2.91796	2.02528	-0.663473	-0.7482	0.521295	0.853376	-0.90777	-0.419468	0.740519	4.76619	4.10438	13.9515	76.0485	100.939	0.491019	2.36257	0.393761	0.462685	0.124663	1.00399	5.58171
356	790.965	671.255	5	100	0	0	0	0.652688	0	0.520262	13.2721	19.8379	0.153608	0.486921	0.15275	0.481895	0.486873	0.465546	0.270673	176.149	393.542	0.140821	2337.86	7807.05	-0.283778	1.12294	1.2975	1.68247	2.72175	1.57159	0.648589	0.761139	0.497107	0.867689	0.835116	0.550074	0.721292	3.64309	4.45398	8.83607	81.1639	114.975	0.391929	2.22759	0.371265	0.47372	0.169111	0.984897	4.96217
310	770.984	685.517	5	100	0	0	0	0.525747	0	0.565068	25.8818	31.0232	0.426245	0.353324	0.385187	0.425116	0.403339	0.421364	0.319302	669.868	962.439	0.180427	17337.4	29857.9	-0.247899	1.41299	1.49169	1.75957	3.02221	3.4599	0.68095	0.73233	0.535473	0.844552	-0.382709	0.923869	0.75171	5.08742	5.56985	25.2295	64.7705	73.2204	0.652874	2.41458	0.402429	0.412351	0.0288092	0.987849	5.83017
354	778.139	662.199	5	100	0	0	0	0.613458	0	0.654409	24.7549	21.9418	0.326269	0.399509	0.290354	0.435642	0.449725	0.483784	0.428251	612.805	481.443	0.280251	15169.9	10563.7	-0.184151	1.39366	1.34127	1.92401	3.57909	2.59115	-0.368915	0.929463	0.60869	0.793408	0.0493285	-0.998783	0.808955	4.97543	4.68421	19.0425	70.9575	87.8768	0.5712	2.38528	0.397547	0.417575	0.0750804	0.988154	5.68957
835	981.75	109.119	5	100	0	0	0	4.74029	1	0.618624	2.22755	66.7827	0.47343	0.244024	0.48899	0.391026	0.397611	0.272325	0.382696	4.96198	4459.93	0.236745	11.0531	297846	-0.208573	0.347827	1.82466	1.85637	2.63354	3.20442	0.791978	-0.610549	0.579915	0.814677	-0.723773	-0.690038	0.786527	1.4925	8.17207	28.2572	61.7428	66.535	0.688062	2.26741	0.377901	0.394319	0.101091	0.952865	5.14113
105	981.962	173.252	5	100	0	0	0	0.522747	0	0.583311	46.1642	14.9986	0.0374258	0.499143	0.0373595	0.453324	0.449009	0.43269	0.340252	2131.13	224.958	0.198473	98382.1	3374.06	-0.2341	1.66431	1.17605	1.79196	3.16472	1.11841	0.819014	-0.573774	0.55079	0.834644	0.651351	-0.758777	0.763748	6.79442	3.8728	2.14484	87.8552	134.714	0.193457	1.90895	0.318159	0.44085	0.218597	0.919931	3.6441
520	934.875	173.422	5	100	0	0	0	0.666613	0	0.618621	2.22755	71.7009	0.242098	0.452395	0.225713	0.469243	0.481208	0.49135	0.382692	4.96198	5141.02	0.236741	11.0531	368616	-0.208575	0.347827	1.85552	1.85637	2.63353	1.9215	0.791978	-0.610549	0.579912	0.814679	0.527564	-0.849515	0.786525	1.4925	8.46764	14.0104	75.9896	100.783	0.492035	2.36201	0.393668	0.460819	0.124537	1.00369	5.57908
737	701.193	278.884	5	100	0	0	0	0.708693	0	0.676227	15.1079	35.031	0.261529	0.444603	0.278197	0.495982	0.498443	0.431662	0.457283	228.249	1227.17	0.309227	3448.36	42989	-0.169907	1.1792	1.54445	1.96644	3.64921	2.15032	0.564695	-0.8253	0.625855	0.77994	-0.455987	-0.889986	0.82233	3.88689	5.9187	15.1608	74.8392	97.7542	0.511399	2.41042	0.401736	0.438133	0.105724	1.01205	5.81011
1114	724.253	299.679	5	100	0	0	0	0.736303	0	0.516644	14.7759	24.2222	0.182864	0.467857	0.194128	0.485018	0.493247	0.435748	0.266921	218.327	586.715	0.137903	3225.98	14211.5	-0.286809	1.16955	1.38421	1.67639	2.71388	1.71236	0.802852	-0.596179	0.493965	0.869482	-0.789836	0.613318	0.71878	3.84394	4.92161	10.5366	79.4634	110.208	0.427626	2.25886	0.376477	0.451802	0.146981	0.978993	5.10246
716	679.589	298.352	5	100	0	0	0	0.588262	0	0.328892	43.3654	12.3842	0.0532052	0.485866	0.0501223	0.444582	0.447538	0.457403	0.10817	1880.56	153.368	0.0355762	81551.1	1899.35	-0.482947	1.63714	1.09287	1.38943	1.92097	1.17203	-0.578507	0.815677	0.322995	0.946401	-0.181165	0.983453	0.573491	6.58524	3.51912	3.04987	86.9501	131.953	0.230663	1.93872	0.323119	0.44606	0.210776	0.921178	3.75862
483	712.019	326.146	5	100	0	0	0	0.655191	0	0.498922	29.1715	20.2607	0.239131	0.464466	0.235028	0.488879	0.492946	0.473846	0.248923	850.976	410.496	0.124193	24824.3	8316.94	-0.301967	1.46496	1.30665	1.64694	2.66729	2.02046	-0.781562	-0.623827	0.478479	0.878099	0.987283	0.158975	0.706344	5.40106	4.50119	13.8353	76.1647	101.248	0.48901	2.3943	0.399049	0.469156	0.125886	1.01719	5.73265
974	708.137	299.928	5	100	0	0	0	0.625259	0	0.525803	25.0537	26.9832	0.13151	0.444001	0.116594	0.424957	0.4502	0.489051	0.276469	627.688	728.093	0.145368	15725.9	19646.3	-0.279177	1.39887	1.43109	1.69182	2.80104	1.47783	-0.078959	0.996878	0.501908	0.864921	0.961149	-0.276031	0.725123	5.00537	5.19454	7.55686	82.4431	118.628	0.362643	2.05631	0.342719	0.434479	0.170721	0.922207	4.22842
975	757.313	285.464	5	100	0	0	0	0.5326	0	0.624101	3.15023	29.5708	0.14268	0.436673	0.161635	0.449928	0.472407	0.39038	0.389502	9.92395	874.432	0.243089	31.2627	25857.7	-0.204745	0.498342	1.47086	1.86657	2.83433	1.50322	-0.00863724	-0.999963	0.584368	0.811489	-0.962607	-0.270902	0.790001	1.77489	5.4379	8.20296	81.797	116.776	0.37773	2.0537	0.342284	0.413527	0.149812	0.902866	4.2177
1026	761.361	293.066	5	100	0	0	0	0.621182	0	0.459972	14.7759	13.0714	0.156746	0.459757	0.143063	0.448555	0.466491	0.490455	0.211574	218.327	170.861	0.0973182	3225.98	2233.4	-0.337269	1.16955	1.11632	1.58403	2.44042	1.58383	0.802852	-0.596179	0.443923	0.896065	0.483833	0.87516	0.678212	3.84394	3.61544	9.01807	80.9819	114.46	0.395912	2.16507	0.360845	0.454156	0.164026	0.956961	4.68752
1401	731.25	318.264	5	100	0	0	0	1.93131	1	0.45322	2.72818	51.2084	0.0555615	0.456818	0.0621995	0.427678	0.442106	0.377902	0.205408	7.44297	2622.3	0.0930952	20.3058	134284	-0.343691	0.435873	1.70934	1.57337	2.17561	1.17725	0.401737	-0.915755	0.437863	0.899042	0.809275	0.587429	0.673216	1.65172	7.156	3.18508	86.8149	131.543	0.235715	1.82227	0.303711	0.40279	0.191506	0.858379	3.32065
1241	739.326	312.191	5	100	0	0	0	0.720128	0	0.639654	21.9387	16.4982	0.0826398	0.463529	0.0748433	0.431165	0.446147	0.474287	0.409157	481.307	272.191	0.261719	10559.2	4490.66	-0.194055	1.34121	1.21744	1.89582	3.46622	1.2786	0.0524245	-0.998625	0.596918	0.802302	-0.71052	-0.703677	0.799784	4.68388	4.0618	4.74032	85.2597	126.872	0.287471	1.97261	0.328769	0.438656	0.194245	0.91498	3.89119
1386	714.633	399.458	5	100	0	0	0	0.599993	0	0.658684	21.0735	11.9158	0.165746	0.427808	0.144798	0.417541	0.449027	0.495544	0.433865	444.092	141.986	0.28578	9358.58	1691.88	-0.181323	1.32374	1.07612	1.93225	3.58744	1.62684	0.794175	-0.607689	0.612077	0.790798	-0.605641	0.795738	0.811593	4.59059	3.45193	9.54057	80.4594	112.988	0.407119	2.10046	0.350077	0.422675	0.153403	0.923573	4.41195
484	728.351	347.534	5	100	0	0	0	0.529545	0	0.704912	25.7376	11.4022	0.0396793	0.481903	0.0369575	0.436722	0.440137	0.455215	0.496901	662.424	130.01	0.350271	17049.2	1482.4	-0.151865	1.41057	1.05699	2.02367	3.94418	1.12574	0.568646	0.822582	0.647967	0.761669	-0.918461	0.395512	0.83959	5.07322	3.37671	2.27405	87.7259	134.318	0.199197	1.89061	0.315102	0.43843	0.214989	0.909306	3.57442
1161	721.494	382.485	5	100	0	0	0	0.54637	0	0.75647	24.7549	9.22534	0.0884131	0.456439	0.0792629	0.425793	0.44437	0.477431	0.572247	612.805	85.1069	0.432888	15169.9	785.14	-0.121208	1.39366	0.964982	2.13074	4.34088	1.29926	-0.368915	0.929463	0.686358	0.727263	0.198118	-0.980178	0.869753	4.97543	3.03732	5.07232	84.9277	125.886	0.297343	1.97171	0.328618	0.435082	0.190369	0.910572	3.88764
703	711.638	363.334	5	100	0	0	0	0.444914	0	0.546386	28.7862	14.5169	0.224299	0.411539	0.194621	0.416231	0.44964	0.499928	0.298538	828.645	210.74	0.163117	23853.5	3059.3	-0.2625	1.45918	1.16187	1.727	2.92243	1.93018	-0.489805	-0.871832	0.519603	0.854408	0.928764	-0.370673	0.739179	5.36528	3.8101	12.9617	77.0383	103.584	0.473602	2.19626	0.366043	0.413885	0.125682	0.93963	4.82355
1122	807.375	368.277	5	100	0	0	0	1.701	1	0.618621	2.22755	75.6767	0.470134	0.257556	0.491454	0.406525	0.384195	0.249204	0.382692	4.96198	5726.96	0.236741	11.0531	433398	-0.208575	0.347827	1.87896	1.85637	2.63353	3.18567	0.791978	-0.610549	0.579912	0.814679	0.274891	0.961475	0.786525	1.4925	8.69924	28.043	61.957	66.9974	0.685663	2.25907	0.376511	0.39536	0.103242	0.950715	5.10339
1303	758.109	398.9	5	100	0	0	0	0.61602	0	0.433243	37.1739	17.5977	0.101595	0.493503	0.102917	0.471571	0.473865	0.446467	0.187699	1381.9	309.679	0.0813195	51370.6	5449.64	-0.363268	1.57024	1.24546	1.54225	2.35491	1.35285	-0.501396	0.865218	0.419816	0.907609	-0.949568	0.313561	0.658212	6.09704	4.19496	5.83103	84.169	123.646	0.31874	2.08992	0.34832	0.459019	0.191185	0.954316	4.36776
1123	808.517	375.215	5	100	0	0	0	1.32214	1	0.433332	10.4481	20.6373	0.0573957	0.497217	0.0566188	0.457921	0.456167	0.443039	0.187777	109.163	425.898	0.0813696	1140.54	8789.39	-0.363179	1.01904	1.31465	1.54239	2.29826	1.18622	-0.853842	-0.520532	0.419897	0.907572	0.976559	-0.21525	0.65828	3.23235	4.54283	3.29034	86.7097	131.224	0.239574	1.96836	0.32806	0.449603	0.210736	0.931552	3.87444
1489	556.395	411.027	5	100	0	0	0	0.64385	0	0.625831	20.1713	23.4176	0.1745	0.473139	0.183604	0.48504	0.492136	0.440074	0.391664	406.881	548.384	0.245116	8207.33	12841.8	-0.203543	1.30473	1.36954	1.8698	3.36691	1.67398	0.969146	0.246486	0.585771	0.810477	-0.9896	-0.143844	0.791095	4.49125	4.83917	10.0496	79.9504	111.563	0.417732	2.24849	0.374749	0.456607	0.152662	0.979361	5.05572
1510	541.776	414.94	5	100	0	0	0	0.510187	0	0.210075	6.86576	68.2283	0.371075	0.07902	0.339621	0.188888	0.49764	0.465266	0.0441315	47.1387	4655.1	0.00927093	323.643	317610	-0.677626	0.836689	1.83396	1.23377	1.50332	2.85971	0.550176	0.835049	0.208533	0.978015	-0.775015	0.631943	0.458339	2.62026	8.26004	21.7819	68.2181	81.2225	0.609159	1.94151	0.323585	0.355348	0.161763	0.871252	3.76946
292	552.964	421.816	5	100	0	0	0	0.720054	0	0.537963	4.16736	26.4986	0.376128	0.386883	0.3408	0.442144	0.439316	0.459953	0.289404	17.3669	702.176	0.155689	72.3741	18606.7	-0.269248	0.619861	1.42322	1.71251	2.59326	2.77783	-0.855112	-0.518443	0.512388	0.858754	0.979074	0.203506	0.73346	2.04141	5.14768	22.094	67.906	80.4809	0.613293	2.44522	0.407537	0.413099	0.046523	1.00366	5.97912
457	550.125	424.785	5	100	0	0	0	0.814459	0	0.485302	3.15023	62.9248	0.468518	0.177962	0.456282	0.308392	0.450499	0.359692	0.235518	9.92395	3959.53	0.114297	31.2627	249153	-0.313988	0.498342	1.79882	1.62467	2.31878	3.37265	-0.00863724	-0.999963	0.466476	0.884534	0.0928132	0.995684	0.696636	1.77489	7.93252	27.9381	62.0619	67.2244	0.684484	2.22134	0.370224	0.405095	0.113499	0.941704	4.93437
287	543	422.032	5	100	0	0	0	0.639991	0	0.284864	7.87556	63.3462	0.417797	0.119807	0.40649	0.241139	0.484448	0.424237	0.0811475	62.0244	4012.74	0.023116	488.477	254192	-0.545362	0.896281	1.80172	1.32958	1.73298	3.26363	0.999767	-0.0215767	0.281027	0.9597	0.491966	0.870614	0.533727	2.80634	7.95903	24.6956	65.3044	74.4325	0.646372	2.09392	0.348986	0.412143	0.138714	0.909372	4.38449
291	545.394	418.84	5	100	0	0	0	0.694325	0	0.277626	8.03153	35.1143	0.359195	0.40507	0.376085	0.494901	0.474993	0.407034	0.0770762	64.5055	1233.01	0.0213984	518.078	43296.4	-0.55654	0.904798	1.54548	1.31999	1.71035	2.77723	0.98428	-0.176617	0.274073	0.961709	-0.528456	-0.848961	0.526902	2.834	5.92573	21.0508	68.9492	82.9729	0.599329	2.51728	0.419546	0.406052	0.0541294	1.03478	6.33669
422	604.955	345.196	5	100	0	0	0	0.559029	0	0.521423	47.723	35.7872	0.0778826	0.472897	0.0846373	0.449647	0.458956	0.402527	0.271882	2277.48	1280.72	0.141765	108688	45833.5	-0.28281	1.67873	1.55373	1.68442	2.80548	1.26208	-0.563908	-0.825838	0.498115	0.867111	-0.942382	-0.334539	0.722096	6.90818	5.98224	4.46687	85.5331	127.687	0.279075	1.94655	0.324424	0.426087	0.189844	0.90095	3.78904
557	575.592	350.87	5	100	0	0	0	0.534143	0	0.535287	14.9428	8.08963	0.121579	0.456076	0.109489	0.434497	0.454371	0.485438	0.286532	223.287	65.4421	0.153377	3336.54	529.402	-0.271413	1.17443	0.907929	1.70794	2.81103	1.42829	0.692655	-0.721269	0.510088	0.860122	0.972363	-0.233473	0.731633	3.86559	2.84423	6.98324	83.0168	120.284	0.348682	2.06145	0.343575	0.444434	0.177428	0.930411	4.24958
698	570.375	347.493	5	100	0	0	0	0.918984	1	0.618621	2.22755	37.1763	0.0774785	0.488292	0.0813751	0.460766	0.46402	0.422094	0.382692	4.96198	1382.08	0.236741	11.0531	51380.5	-0.208575	0.347827	1.57027	1.85637	2.63353	1.25129	0.791978	-0.610549	0.579912	0.814679	-0.499318	0.866419	0.786525	1.4925	6.09724	4.44364	85.5564	127.756	0.27835	1.99403	0.332338	0.44143	0.197052	0.925655	3.97614
429	607.792	333.203	5	100	0	0	0	0.561983	0	0.127632	6.68264	85.5039	0.169959	0.0134433	0.150252	0.080892	0.472757	0.496276	0.0162899	44.6577	7310.92	0.00207912	298.431	625112	-0.89404	0.824948	1.93199	1.13613	1.28464	1.64258	0.388916	0.921273	0.127286	0.991866	-0.629491	-0.777008	0.357256	2.58508	9.24683	9.78544	80.2146	112.301	0.412261	1.38358	0.230597	0.160106	0.204414	0.726619	1.91429
907	599.465	300.064	5	100	0	0	0	0.766321	0	0.591168	33.4873	38.0711	0.18677	0.427805	0.211449	0.461944	0.482332	0.394119	0.34948	1121.4	1449.41	0.206601	37552.6	55180.6	-0.228289	1.52488	1.5806	1.8061	3.19576	1.74107	0.877306	-0.479932	0.557331	0.83029	0.363468	0.931607	0.768875	5.78682	6.17018	10.7643	79.2357	109.577	0.432169	2.16442	0.360737	0.410962	0.12899	0.929504	4.68471
308	548.813	338.854	5	100	0	0	0	0.726988	0	0.521677	7.04412	35.8684	0.396405	0.393852	0.392413	0.480803	0.452519	0.415715	0.272147	49.6196	1286.54	0.141973	349.527	46146.2	-0.282598	0.847827	1.55471	1.68485	2.64167	3.04713	0.689599	0.724192	0.498335	0.866985	-0.966412	-0.256999	0.722272	2.65408	5.98902	23.3536	66.6464	77.523	0.629607	2.53171	0.421951	0.40606	0.0367464	1.03683	6.40954
880	571.289	364.817	5	100	0	0	0	0.634382	0	0.593345	20.9555	9.73368	0.148944	0.446193	0.132876	0.431956	0.456022	0.49181	0.352058	439.133	94.7445	0.208892	9202.25	922.213	-0.226693	1.3213	0.988277	1.81003	3.1709	1.54812	0.860193	-0.509968	0.559137	0.829075	-0.304013	-0.952668	0.770289	4.57772	3.11988	8.56573	81.4343	115.742	0.385933	2.1078	0.3513	0.439075	0.164242	0.9356	4.44283
580	549	341.647	5	100	0	0	0	1.32338	1	0.618624	2.22755	32.6175	0.362299	0.411487	0.37011	0.494237	0.474682	0.421432	0.382696	4.96198	1063.9	0.236745	11.0531	34701.8	-0.208573	0.347827	1.51345	1.85637	2.63354	2.5244	0.791978	-0.610549	0.579915	0.814677	0.932608	0.360891	0.786527	1.4925	5.71117	21.2415	68.7585	82.5146	0.601913	2.53425	0.422374	0.416459	0.0535917	1.04152	6.42241
1216	630.125	375.639	5	100	0	0	0	0.533913	0	0.324177	3.85822	91.0279	0.107145	0.00672767	0.121582	0.0559251	0.454475	0.482692	0.105091	14.8859	8286.08	0.034068	57.4329	754264	-0.489218	0.586387	1.95917	1.38289	1.81866	1.36669	-0.656845	-0.754025	0.318529	0.947913	0.078207	-0.996937	0.569365	1.96424	9.54085	6.15076	83.8492	122.709	0.32733	1.22855	0.204758	0.114364	0.208528	0.684817	1.50933
970	616.388	372.952	5	100	0	0	0	0.6372	0	0.624817	26.9615	28.2528	0.0584249	0.461139	0.0649047	0.432348	0.445305	0.383008	0.390396	726.922	798.221	0.243926	19598.9	22552	-0.204247	1.43074	1.45106	1.8679	3.3917	1.19069	0.966912	-0.255111	0.584949	0.81107	0.0215322	-0.999768	0.790454	5.19245	5.31534	3.34941	86.6506	131.045	0.241712	1.84513	0.307522	0.407678	0.192237	0.86729	3.4045
433	631.346	345.028	5	100	0	0	0	0.737485	0	0.639425	13.4578	31.4973	0.215797	0.419421	0.244652	0.467941	0.486426	0.393339	0.408864	181.112	992.08	0.261438	2437.37	31247.8	-0.19421	1.12897	1.49827	1.89539	3.39005	1.88307	0.777971	0.628301	0.596734	0.802439	0.0812837	0.996691	0.799641	3.66849	5.61225	12.4623	77.5377	104.931	0.46454	2.22758	0.371263	0.40638	0.114556	0.944792	4.96209
823	628.093	355.061	5	100	0	0	0	0.599134	0	0.489346	10.6829	23.1199	0.115237	0.490136	0.111992	0.469576	0.474259	0.466829	0.23946	114.124	534.53	0.117179	1219.18	12358.3	-0.310384	1.02869	1.36399	1.63125	2.54932	1.40543	-0.951514	-0.307604	0.470049	0.88264	-0.903879	-0.427789	0.699533	3.26847	4.80832	6.6173	83.3827	121.347	0.339466	2.12803	0.354672	0.468202	0.186899	0.964058	4.52851
369	726.044	416.84	5	100	0	0	0	0.573857	0	0.674149	26.0728	23.6975	0.317253	0.423171	0.29302	0.462936	0.468558	0.480909	0.454477	679.791	561.572	0.306385	17724.1	13307.8	-0.171244	1.41619	1.3747	1.96236	3.7222	2.52955	0.807593	0.589741	0.624233	0.781238	-0.990826	0.13514	0.821066	5.10615	4.86801	18.4969	71.5031	89.2334	0.563252	2.44585	0.407641	0.443053	0.0820802	1.01524	5.98217
837	763.542	456.073	5	100	0	0	0	0.638697	0	0.493092	33.7823	18.0927	0.046323	0.49718	0.0473083	0.455512	0.452735	0.426127	0.24314	1141.24	327.346	0.11989	38553.8	5922.57	-0.307072	1.52869	1.2575	1.63737	2.64322	1.14846	0.699873	-0.714268	0.473352	0.880873	-0.686639	0.726998	0.702205	5.81225	4.25355	2.65506	87.3449	133.154	0.215228	1.92519	0.320864	0.439431	0.213492	0.919574	3.70634
538	730.469	438.214	5	100	0	0	0	0.652819	0	0.526688	25.3001	19.9641	0.19211	0.478968	0.193198	0.489717	0.494586	0.464679	0.2774	640.095	398.565	0.146103	16194.5	7957	-0.278447	1.40312	1.30025	1.69331	2.80638	1.76222	0.166579	0.986028	0.502673	0.864477	0.89771	0.440587	0.725733	5.02992	4.46812	11.0759	78.9241	108.717	0.438304	2.31326	0.385543	0.471824	0.149764	1.002	5.35116
118	409.254	257.27	5	100	0	0	0	0.490001	0	0.652953	27.2363	24.1301	0.209701	0.474592	0.211678	0.492635	0.497022	0.463825	0.426348	741.816	582.262	0.278385	20204.3	14050	-0.185118	1.43515	1.38256	1.92121	3.57989	1.85699	0.861407	-0.507915	0.607535	0.794293	-0.842895	0.538078	0.808055	5.21884	4.91224	12.1048	77.8952	105.901	0.457931	2.34945	0.391576	0.469209	0.140631	1.00939	5.51993
906	408.75	280.592	5	100	0	0	0	0.774171	0	0.618624	2.22755	74.3047	0.266822	0.0458309	0.304571	0.164119	0.48273	0.484914	0.382696	4.96198	5521.19	0.236745	11.0531	410250	-0.208573	0.347827	1.87102	1.85637	2.63354	2.0392	0.791978	-0.610549	0.579915	0.814677	-0.888251	0.459358	0.786527	1.4925	8.62002	15.4752	74.5248	96.9345	0.516548	1.74899	0.291498	0.285697	0.173975	0.813119	3.05896
119	431.373	258.035	5	100	0	0	0	0.530102	0	0.636723	28.0883	19.3595	0.301256	0.42282	0.274598	0.455143	0.46661	0.487645	0.405416	788.953	374.79	0.258138	22160.3	7255.75	-0.196049	1.44853	1.28689	1.89028	3.47369	2.41239	0.184963	-0.982746	0.594564	0.804048	0.488128	0.872772	0.797949	5.29984	4.39994	17.5331	72.4669	91.6552	0.548868	2.40807	0.401345	0.438982	0.0907141	1.0038	5.79881
732	419.781	289.921	5	100	0	0	0	0.833762	0	0.447078	34.1475	36.1993	0.293767	0.38371	0.335947	0.474126	0.479736	0.371172	0.199879	1166.05	1310.39	0.0893614	39817.8	47435.2	-0.349617	1.53336	1.5587	1.56374	2.41718	2.37931	0.398627	-0.917113	0.432333	0.901714	-0.997482	0.0709249	0.668639	5.84359	6.01659	17.0836	72.9164	92.7956	0.542003	2.33846	0.389743	0.377441	0.0744391	0.969074	5.46839
890	412.875	279.943	5	100	0	0	0	1.3928	1	0.618621	2.22755	74.5692	0.267064	0.0458752	0.302625	0.163102	0.48353	0.485538	0.382692	4.96198	5560.57	0.236741	11.0531	414647	-0.208575	0.347827	1.87256	1.85637	2.63353	2.04039	0.791978	-0.610549	0.579912	0.814679	-0.737272	0.675596	0.786525	1.4925	8.63535	15.4896	74.5104	96.8971	0.516782	1.74773	0.291289	0.284845	0.174393	0.813118	3.05457
1162	510.124	304.483	5	100	0	0	0	0.583541	0	0.478492	18.1651	25.4405	0.295553	0.447683	0.295327	0.496653	0.493609	0.459683	0.228955	329.971	647.219	0.109553	5993.95	16465.6	-0.320125	1.25924	1.40553	1.61364	2.54066	2.36932	-0.632252	0.774763	0.460441	0.88769	0.302923	0.953015	0.691731	4.26205	5.04386	17.1907	72.8093	92.5233	0.543648	2.48851	0.414751	0.453683	0.09434	1.0376	6.19267
1340	511.629	319.127	5	100	0	0	0	0.645159	0	0.629555	17.3977	32.6523	0.370527	0.409522	0.356501	0.477547	0.462745	0.446284	0.396339	302.68	1066.17	0.249518	5265.94	34813	-0.200966	1.24049	1.51391	1.87678	3.37076	2.93422	-0.992935	0.11866	0.588785	0.80829	0.9446	0.328224	0.793445	4.17106	5.71422	21.7481	68.2519	81.303	0.608709	2.52313	0.420521	0.427903	0.0498347	1.03607	6.36616
1238	497.692	312.859	5	100	0	0	0	0.710193	0	0.407816	16.6694	48.0133	0.488647	0.27717	0.439721	0.372985	0.315737	0.307346	0.166314	277.869	2305.28	0.0678255	4631.91	110684	-0.389536	1.22192	1.68136	1.50353	2.217	4.09697	-0.820015	-0.572342	0.396605	0.917989	-0.7767	-0.62987	0.638605	4.08282	6.92916	29.2517	60.7483	64.4089	0.699033	2.20161	0.366934	0.344361	0.0829193	0.917727	4.84707
1465	496.125	328.007	5	100	0	0	0	2.26573	1	0.618621	2.22755	42.1714	0.238123	0.406686	0.271943	0.468434	0.485711	0.385949	0.382692	4.96198	1778.43	0.236741	11.0531	74998.8	-0.208575	0.347827	1.62502	1.85637	2.63353	1.90047	0.791978	-0.610549	0.579912	0.814679	-0.971314	-0.237801	0.786525	1.4925	6.49395	13.7758	76.2242	101.406	0.487978	2.25685	0.376141	0.396317	0.101448	0.948868	5.09335
1359	501.375	315.017	5	100	0	0	0	0.900088	1	0.341195	3.15023	48.3297	0.499026	0.206441	0.435228	0.302026	0.382999	0.296567	0.116414	9.92395	2335.76	0.0397199	31.2627	112887	-0.466997	0.498342	1.68421	1.40663	1.85096	3.60002	-0.00863724	-0.999963	0.334613	0.942355	-0.934129	-0.356936	0.584119	1.77489	6.95196	29.9356	60.0644	62.9668	0.706418	2.12229	0.353714	0.342512	0.106061	0.898292	4.5041
766	499.331	276.611	5	100	0	0	0	0.851848	0	0.149342	8.76986	68.1419	0.354586	0.0915283	0.405207	0.244228	0.471874	0.442841	0.022303	76.9104	4643.32	0.00333078	674.494	316405	-0.825818	0.942993	1.83341	1.16107	1.34136	2.7658	0.609094	-0.793098	0.148787	0.988869	-0.826656	0.562708	0.386448	2.96139	8.25481	20.7681	69.2319	83.6547	0.595471	2.01026	0.335044	0.379896	0.143663	0.881318	4.04116
122	500.087	255.553	5	100	0	0	0	0.688231	0	0.346066	48.1371	28.726	0.0641866	0.488959	0.0674832	0.45629	0.458229	0.417684	0.119762	2317.18	825.183	0.0414454	111542	23704.2	-0.460841	1.68248	1.45828	1.4135	1.98812	1.21152	-0.848535	-0.529139	0.3392	0.940714	-0.436465	-0.899721	0.588274	6.93809	5.35966	3.68015	86.3198	130.047	0.253351	1.95283	0.325472	0.436987	0.202384	0.916727	3.81355
123	514.955	246.458	5	100	0	0	0	0.574029	0	0.525543	23.5742	22.1769	0.017514	0.495578	0.0181364	0.443884	0.438507	0.407972	0.276195	555.743	491.815	0.145153	13101.2	10906.9	-0.279392	1.37244	1.3459	1.69138	2.79593	1.05386	-0.999925	0.0122548	0.501683	0.865052	-0.184685	-0.982798	0.724943	4.85533	4.70924	1.00353	88.9965	138.237	0.13234	1.82159	0.303599	0.423239	0.223143	0.895542	3.3182
768	516.56	282.027	5	100	0	0	0	0.738093	0	0.142229	12.8928	74.9359	0.362335	0.0848589	0.362858	0.208186	0.493441	0.463086	0.0202291	166.224	5615.39	0.00287716	2143.1	420794	-0.847012	1.11035	1.87469	1.15284	1.32492	2.86435	0.320663	0.947193	0.14175	0.989902	-0.446029	0.895018	0.377133	3.59065	8.65655	21.2437	68.7563	82.5093	0.601943	1.97476	0.329127	0.362596	0.155871	0.87831	3.8997
711	532.875	269.55	5	100	0	0	0	0.483422	0	0.341195	3.15023	85.9684	0.177934	0.0146551	0.156795	0.0845624	0.47516	0.497295	0.116414	9.92395	7390.57	0.0397199	31.2627	635355	-0.466997	0.498342	1.93434	1.40663	1.85096	1.65579	-0.00863724	-0.999963	0.334613	0.942355	-0.910875	-0.412683	0.584119	1.77489	9.27191	10.2494	79.7506	111.006	0.421822	1.4064	0.2344	0.167364	0.203484	0.732591	1.97797
928	536.148	296.474	5	100	0	0	0	0.718207	0	0.434916	25.251	12.6599	0.161188	0.452715	0.145713	0.44241	0.462336	0.490998	0.189152	637.613	160.273	0.0822652	16100.4	2029.04	-0.361595	1.40228	1.10243	1.54483	2.35162	1.6072	0.117983	0.993016	0.421334	0.906905	0.0933931	0.995629	0.659482	5.02504	3.55808	9.27586	80.7241	113.732	0.401482	2.15536	0.359227	0.447562	0.160289	0.950118	4.64558
650	516.983	281.304	5	100	0	0	0	0.62092	0	0.346685	36.5345	31.4455	0.158142	0.462077	0.145014	0.451535	0.468239	0.489714	0.12019	1334.77	988.819	0.0416682	48765.1	31093.9	-0.460065	1.5627	1.49756	1.41437	1.98745	1.60004	-0.918635	0.395107	0.339782	0.940504	0.0295692	0.999563	0.5888	6.04438	5.60763	9.09907	80.9009	114.231	0.397671	2.17472	0.362453	0.456806	0.163871	0.960471	4.72941
1278	226.918	991.97	5	100	0	0	0	0.66688	0	0.265642	28.5264	27.548	0.240471	0.462562	0.247628	0.496833	0.499468	0.452704	0.0705657	813.755	758.892	0.0187452	23213.5	20906	-0.575703	1.45525	1.44009	1.30427	1.6928	2.03245	-0.249405	-0.968399	0.262529	0.964924	0.664133	-0.747614	0.515405	5.34101	5.24862	13.9143	76.0857	101.038	0.490378	2.39967	0.399944	0.457633	0.122171	1.01704	5.7584
1337	233.034	986.295	5	100	0	0	0	0.608839	0	0.232833	11.3583	65.0922	0.4474	0.285274	0.487074	0.438111	0.34993	0.246715	0.0542112	129.011	4236.99	0.0126222	1465.35	275795	-0.632955	1.05531	1.81353	1.26217	1.57824	3.60691	-0.934933	0.354824	0.230735	0.973017	0.771532	-0.636191	0.482528	3.37021	8.06797	26.577	63.423	70.2055	0.66888	2.2545	0.375751	0.39402	0.0968693	0.945542	5.08279
418	266.495	942.412	5	100	0	0	0	0.479576	0	0.611938	68.0942	29.0943	0.0747313	0.44181	0.0850369	0.424021	0.445618	0.372204	0.374468	4636.82	846.478	0.229151	315741	24627.7	-0.213293	1.83311	1.46381	1.844	3.36348	1.25029	-0.852547	0.522651	0.574455	0.818536	-0.731123	-0.682246	0.782265	8.25192	5.39391	4.28578	85.7142	128.228	0.27337	1.84342	0.307237	0.398112	0.178073	0.851421	3.3982
1113	242.968	974.628	5	100	0	0	0	0.605792	0	0.452042	21.4817	19.4786	0.0292569	0.494865	0.0303401	0.447672	0.444127	0.411879	0.204342	461.463	379.416	0.0923712	9913.02	7390.49	-0.344821	1.33207	1.28956	1.57152	2.42408	1.09146	0.487696	-0.873014	0.436803	0.899557	0.588372	0.80859	0.672341	4.63484	4.41346	1.67654	88.3235	136.154	0.171046	1.85814	0.30969	0.428003	0.218414	0.902204	3.45268
1361	253.868	991.681	5	100	0	0	0	0.843311	0	0.423179	11.467	33.0431	0.32073	0.401799	0.35199	0.490477	0.483652	0.392932	0.17908	131.492	1091.85	0.0757831	1507.82	36078	-0.373476	1.05945	1.51908	1.52681	2.26197	2.52756	-0.890922	0.454157	0.410661	0.911788	0.998411	-0.0563473	0.650522	3.3863	5.74831	18.7071	71.2929	88.7095	0.56633	2.44158	0.40693	0.397366	0.0686112	1.00851	5.96131
1490	234.125	920.369	5	100	0	0	0	0.989676	1	0.399232	3.85822	41.7835	0.099223	0.471183	0.107753	0.456929	0.467534	0.408885	0.159386	14.8859	1745.86	0.0636321	57.4329	72948.2	-0.398775	0.586387	1.621	1.49068	2.06182	1.33581	-0.656845	-0.754025	0.388711	0.92136	-0.809204	-0.587528	0.631848	1.96424	6.46402	5.69443	84.3056	124.048	0.314997	2.01151	0.335251	0.432907	0.180924	0.915439	4.04616
893	208.351	970.585	5	100	0	0	0	0.564712	0	0.671119	43.8494	17.0028	0.247058	0.423937	0.219522	0.436752	0.460983	0.498193	0.450401	1922.77	289.095	0.302272	84312.3	4915.43	-0.1732	1.64196	1.23052	1.95643	3.75093	2.06788	-0.132506	0.991182	0.621863	0.783126	-0.962164	-0.27247	0.819219	6.62189	4.12345	14.3035	75.6965	100.007	0.497049	2.28645	0.381074	0.430345	0.117558	0.969744	5.22783
864	230	949.597	5	100	0	0	0	1.08074	1	0.751584	3.85822	50.0675	0.495614	0.189845	0.431159	0.285669	0.401857	0.31571	0.564879	14.8859	2506.75	0.424554	57.4329	125507	-0.124022	0.586387	1.69956	2.12036	3.5187	3.69186	-0.656845	-0.754025	0.682797	0.730608	-0.196692	0.980465	0.866939	1.96424	7.07584	29.7102	60.2898	63.4402	0.703999	2.11985	0.353309	0.358784	0.110795	0.900189	4.49378
1289	229.125	977.526	5	100	0	0	0	0.367441	0	0.618601	2.22755	71.2591	0.193694	0.440048	0.215263	0.472601	0.488436	0.407567	0.382667	4.96198	5077.86	0.236718	11.0531	361844	-0.208589	0.347827	1.85284	1.85633	2.63346	1.70449	0.791978	-0.610549	0.579896	0.814691	0.840134	-0.542378	0.786512	1.4925	8.44151	11.1684	78.8316	108.462	0.440107	2.21761	0.369602	0.423808	0.131071	0.951593	4.91779
726	232.519	951.62	5	100	0	0	0	0.889625	0	0.389799	13.9999	42.6028	0.452071	0.341163	0.42421	0.434026	0.386737	0.377953	0.151943	195.997	1815	0.0592273	2743.94	77324	-0.409159	1.14612	1.62944	1.47668	2.13503	3.67085	0.990594	0.136836	0.380003	0.924985	-0.981758	0.190135	0.624339	3.74164	6.52708	26.8766	63.1234	69.5437	0.672362	2.41616	0.402693	0.405473	0.0413171	0.99071	5.83783
446	453.06	942.778	5	100	0	0	0	0.582812	0	0.654052	39.7539	19.1309	0.160112	0.485472	0.16121	0.484448	0.489291	0.461041	0.427784	1580.37	365.991	0.279793	62826	7001.74	-0.184388	1.59938	1.28174	1.92332	3.62165	1.60714	0.885145	-0.465316	0.608407	0.793625	0.277647	0.960683	0.808735	6.30507	4.37389	9.2134	80.7866	113.908	0.40014	2.24157	0.373596	0.472745	0.165239	0.986895	5.02465
1285	454.379	908.116	5	100	0	0	0	0.604008	0	0.636425	27.7774	23.9913	0.339054	0.424872	0.324036	0.47945	0.473926	0.46409	0.405037	771.584	575.582	0.257776	21432.6	13809	-0.196253	1.44369	1.38005	1.88971	3.47064	2.69409	0.476733	-0.879048	0.594324	0.804226	-0.909234	0.416285	0.797762	5.27043	4.89809	19.8192	70.1808	85.9634	0.582283	2.50543	0.417571	0.444481	0.069478	1.03457	6.27717
690	464.915	876.393	5	100	0	0	0	0.521368	0	0.61373	37.5723	29.9456	0.226929	0.438712	0.249215	0.483447	0.494078	0.414692	0.376665	1411.68	896.739	0.23117	53040	26853.4	-0.212023	1.57487	1.47633	1.84731	3.34589	1.95745	-0.126472	0.99197	0.575921	0.817506	-0.994957	0.100301	0.783409	6.12962	5.47226	13.1163	76.8837	103.168	0.476371	2.30707	0.384512	0.426702	0.117285	0.977689	5.32259
748	418.5	941.803	5	100	0	0	0	0.351937	0	0.618624	2.22755	48.7595	0.487922	0.224567	0.471778	0.353018	0.410623	0.304259	0.382696	4.96198	2377.49	0.236745	11.0531	115925	-0.208573	0.347827	1.68806	1.85637	2.63354	3.29029	0.791978	-0.610549	0.579915	0.814677	-0.9979	0.0647685	0.786527	1.4925	6.9828	29.2041	60.7959	64.5099	0.698514	2.25217	0.375361	0.381821	0.101492	0.947037	5.07226
335	436.126	853.638	5	100	0	0	0	0.562071	0	0.679572	46.6188	13.3825	0.163177	0.444254	0.145639	0.433947	0.458307	0.493856	0.461818	2173.31	179.091	0.313839	101317	2396.69	-0.167765	1.66856	1.12654	1.97303	3.81758	1.61926	0.483886	-0.875131	0.62846	0.777842	0.7285	0.685046	0.824362	6.8278	3.65821	9.39135	80.6087	113.407	0.403952	2.13918	0.35653	0.439101	0.157966	0.942045	4.57609
438	408.081	938.297	5	100	0	0	0	0.605734	0	0.41616	46.9105	47.0798	0.465743	0.280959	0.486973	0.425594	0.361151	0.244147	0.173189	2200.6	2216.51	0.0720744	103231	104353	-0.38074	1.67127	1.67283	1.51613	2.28188	3.93564	0.211774	-0.977319	0.404251	0.914648	0.0440755	-0.999028	0.645105	6.84912	6.86147	27.7583	62.2417	67.6145	0.682454	2.26457	0.377428	0.393373	0.0994531	0.950876	5.12826
817	402.126	882.892	5	100	0	0	0	0.503941	0	0.533153	36.159	29.079	0.0776734	0.446675	0.087813	0.429192	0.448995	0.377437	0.284252	1307.47	845.588	0.15155	47276.9	24588.9	-0.273148	1.55822	1.46358	1.7043	2.85997	1.261	-0.999529	0.0306797	0.508251	0.861209	-0.720599	-0.693352	0.730173	6.01324	5.39249	4.45485	85.5452	127.723	0.278699	1.86779	0.311298	0.403315	0.178934	0.861118	3.48862
868	381.588	896.619	5	100	0	0	0	0.502273	0	0.621087	42.0293	33.3316	0.234141	0.414023	0.265392	0.471445	0.487522	0.391878	0.385749	1766.46	1111	0.239584	74243.2	37031.3	-0.206848	1.62355	1.52286	1.86095	3.40105	2.00108	-0.927846	-0.372963	0.58192	0.813246	0.941117	-0.338081	0.788091	6.483	5.77335	13.541	76.459	102.032	0.483881	2.2644	0.3774	0.40295	0.105443	0.954032	5.12751
444	429.729	903.55	5	100	0	0	0	0.651944	0	0.509331	46.6991	22.8039	0.189679	0.471708	0.19716	0.48768	0.492377	0.445437	0.259418	2180.81	520.018	0.13213	101842	11858.4	-0.293	1.66931	1.35801	1.66418	2.73922	1.75432	0.412129	-0.911125	0.487593	0.873071	-0.726182	-0.687503	0.713674	6.83367	4.77534	10.9341	79.0659	109.108	0.435522	2.28404	0.380673	0.458573	0.14599	0.987947	5.21684
803	157.432	793.304	5	100	0	0	0	0.669503	0	0.639467	20.8367	37.6164	0.300388	0.386018	0.341268	0.477384	0.480127	0.373877	0.408918	434.168	1414.99	0.26149	9046.63	53227	-0.194182	1.31883	1.57538	1.89547	3.45856	2.41432	0.914572	-0.404423	0.596768	0.802414	-0.0826176	0.996581	0.799667	4.56472	6.13322	17.4809	72.5191	91.7872	0.548077	2.35906	0.393177	0.379947	0.072635	0.976682	5.56517
186	178.972	766.74	5	100	0	0	0	0.567373	0	0.477562	47.4103	38.5765	0.450784	0.33998	0.449817	0.454447	0.392319	0.344188	0.228065	2247.74	1488.15	0.108915	106566	57407.5	-0.32097	1.67587	1.58632	1.61214	2.57436	3.7595	-0.28251	-0.959264	0.459615	0.888118	0.769072	0.639162	0.691059	6.88551	6.211	26.794	63.206	69.7259	0.671404	2.43154	0.405256	0.421068	0.0541033	1.00001	5.91236
1023	170.531	805.107	5	100	0	0	0	0.592123	0	0.633413	18.3688	21.2282	0.334249	0.390607	0.294879	0.42772	0.442939	0.481788	0.401212	337.413	450.636	0.254133	6197.87	9566.2	-0.198313	1.26408	1.32691	1.88403	3.4028	2.63749	-0.46245	0.886646	0.591899	0.806012	0.691056	-0.722802	0.795872	4.28588	4.60741	19.5269	70.4731	86.6811	0.578143	2.37218	0.395364	0.409164	0.0701916	0.981075	5.62725
996	180.375	794.362	5	100	0	0	0	2.02241	1	0.618611	2.22755	85.6868	0.329596	0.0680457	0.332417	0.186693	0.494002	0.477899	0.38268	4.96198	7342.23	0.23673	11.0531	629132	-0.208582	0.347827	1.93291	1.85635	2.6335	2.35953	0.791978	-0.610549	0.579904	0.814685	-0.760315	-0.649554	0.786518	1.4925	9.25672	19.2443	70.7557	87.3777	0.574105	1.88865	0.314775	0.331006	0.165253	0.855011	3.56701
1242	246.855	823.947	5	100	0	0	0	0.45924	0	0.676128	26.3566	28.4333	0.234789	0.441	0.255888	0.487207	0.4958	0.419262	0.457149	694.67	808.453	0.309091	18309.1	22987	-0.169971	1.42089	1.45383	1.96625	3.73756	1.99867	0.940418	0.340019	0.625778	0.780002	-0.158297	-0.987391	0.82227	5.13387	5.33229	13.5792	76.4208	101.93	0.48455	2.33395	0.388991	0.430131	0.11504	0.986942	5.4473
843	243.324	791.872	5	100	0	0	0	0.524595	0	0.634179	18.0967	35.8105	0.309383	0.380519	0.352078	0.477106	0.477427	0.369078	0.402183	327.491	1282.39	0.255056	5926.5	45923.1	-0.197788	1.2576	1.55401	1.88547	3.40558	2.47159	-0.683726	0.729739	0.592516	0.805558	-0.94992	-0.312492	0.796354	4.25402	5.98419	18.0221	71.9779	90.4225	0.556222	2.36559	0.394265	0.374799	0.0686827	0.977884	5.59602
651	273.206	791.852	5	100	0	0	0	0.567865	0	0.548035	39.2202	23.2713	0.167686	0.477367	0.174892	0.484879	0.490952	0.444332	0.300342	1538.22	541.553	0.164598	60329.5	12602.7	-0.261192	1.59351	1.36682	1.72985	2.94752	1.64435	0.998765	0.0496877	0.521011	0.85355	-0.958059	-0.28657	0.740294	6.2626	4.82403	9.65331	80.3467	112.671	0.409495	2.24011	0.373351	0.46085	0.15736	0.979876	5.01808
1092	265.475	812.267	5	100	0	0	0	0.547335	0	0.635177	22.7166	19.7453	0.162985	0.485242	0.162614	0.484037	0.489071	0.465408	0.40345	516.044	389.877	0.256262	11722.8	7698.24	-0.197105	1.35634	1.29546	1.88736	3.44113	1.61854	-0.663473	-0.7482	0.59332	0.804967	0.780674	0.624938	0.79698	4.76619	4.44357	9.3802	80.6198	113.439	0.403714	2.24936	0.374893	0.474722	0.164491	0.989219	5.05961
1071	247.092	805.328	5	100	0	0	0	0.490274	0	0.521263	15.9856	32.0586	0.424982	0.36992	0.403907	0.455605	0.422	0.408368	0.271715	255.539	1027.75	0.141635	4084.95	32948.3	-0.282943	1.20373	1.50594	1.68415	2.74452	3.4079	-0.274084	-0.961706	0.497976	0.867191	0.599338	0.800496	0.721985	3.9982	5.66203	25.1495	64.8505	73.4013	0.651906	2.48478	0.41413	0.415184	0.0282564	1.01637	6.17414
329	314.205	833.828	5	100	0	0	0	0.432373	0	0.674164	39.0618	41.2134	0.376347	0.347246	0.423402	0.47435	0.445042	0.333816	0.454497	1525.82	1698.54	0.306406	59601.4	70002.8	-0.171234	1.59175	1.61504	1.96239	3.76389	3.02903	0.978424	0.206609	0.624244	0.781229	-0.364127	-0.931349	0.821075	6.24994	6.41977	22.1076	67.8924	80.4488	0.613471	2.4002	0.400034	0.399875	0.0562621	0.987922	5.76097
1257	283.289	826.439	5	100	0	0	0	0.694553	0	0.664958	27.9999	23.6164	0.282328	0.451148	0.281283	0.49449	0.493896	0.463364	0.442169	783.994	557.734	0.294024	21951.8	13171.7	-0.177206	1.44716	1.37321	1.94441	3.66587	2.29039	0.271002	-0.962579	0.617026	0.786943	-0.998518	0.0544282	0.81545	5.29149	4.85967	16.3992	73.6008	94.5459	0.531345	2.46651	0.411085	0.457256	0.101567	1.03224	6.08367
624	285.24	862.296	5	100	0	0	0	0.620038	0	0.588207	15.9856	30.9315	0.209079	0.426639	0.235387	0.469923	0.487438	0.398488	0.345987	255.539	956.758	0.203512	4084.95	29594	-0.23047	1.20373	1.4904	1.80076	3.11012	1.84972	-0.274084	-0.961706	0.55487	0.831937	-0.465701	0.884942	0.766947	3.9982	5.56161	12.0684	77.9316	106	0.457252	2.22695	0.371159	0.412563	0.119837	0.947818	4.95932
325	266.537	842.452	5	100	0	0	0	0.944477	1	0.613387	15.9078	32.3903	0.425053	0.371207	0.413299	0.464358	0.425664	0.397369	0.376244	253.058	1049.13	0.230783	4025.6	33981.7	-0.212265	1.20161	1.51041	1.84668	3.25837	3.40859	-0.198509	-0.980099	0.57564	0.817703	0.82735	0.561687	0.78319	3.98846	5.69125	25.154	64.846	73.3911	0.651961	2.49695	0.416158	0.419176	0.0312234	1.02176	6.23476
328	282.78	847.556	5	100	0	0	0	0.482783	0	0.635889	20.8962	10.4937	0.165675	0.447638	0.148673	0.438231	0.461089	0.493863	0.404355	436.651	110.118	0.257125	9124.35	1155.54	-0.196619	1.32007	1.02093	1.8887	3.4357	1.625	0.888905	-0.458092	0.593893	0.804544	-0.876682	-0.48107	0.797426	4.57124	3.2394	9.53645	80.4636	112.999	0.407032	2.15517	0.359195	0.442935	0.157706	0.947883	4.64475
399	984.845	768.391	5	100	0	0	0	0.65329	0	0.690804	35.6406	20.0996	0.0864589	0.494191	0.0845754	0.464356	0.466265	0.456836	0.47721	1270.25	403.994	0.329659	45272.6	8120.12	-0.160645	1.55195	1.30319	1.99532	3.87807	1.29388	-0.883406	-0.468609	0.637157	0.770734	0.948999	0.315281	0.831146	5.96997	4.48326	4.95992	85.0401	126.219	0.294039	2.05268	0.342114	0.460596	0.199164	0.94899	4.2135
367	857.671	671.759	5	100	0	0	0	0.629757	0	0.535441	37.3405	18.5638	0.269168	0.427868	0.243075	0.44901	0.466625	0.494244	0.286697	1394.31	344.615	0.153509	52064.3	6397.36	-0.271288	1.57218	1.26867	1.7082	2.87411	2.20416	-0.350975	0.936385	0.51022	0.860044	-0.281883	0.959449	0.731738	6.11069	4.30857	15.6148	74.3852	96.5719	0.518814	2.34999	0.391665	0.438439	0.107541	0.989057	5.52245
898	846.833	639.88	5	100	0	0	0	0.587781	0	0.571953	47.3582	13.0444	0.167162	0.471826	0.156951	0.465621	0.477425	0.486171	0.32713	2242.8	170.156	0.187103	106215	2219.59	-0.24264	1.6754	1.11542	1.77172	3.09645	1.63791	-0.232172	-0.972675	0.541275	0.840845	0.46003	0.887903	0.756276	6.88173	3.6117	9.62285	80.3771	112.757	0.408854	2.22516	0.370859	0.468724	0.161911	0.977904	4.95132
744	872.833	619.448	5	100	0	0	0	0.547946	0	0.472564	21.5969	10.7663	0.0747091	0.452079	0.0664724	0.417971	0.437508	0.473959	0.223317	466.426	115.913	0.105531	10073.4	1247.96	-0.325539	1.33439	1.03207	1.6041	2.52159	1.24835	0.384115	-0.923285	0.455171	0.890404	-0.973832	-0.227271	0.687433	4.64725	3.2812	4.28451	85.7155	128.232	0.27333	1.9227	0.32045	0.427739	0.194421	0.897288	3.69677
324	888.895	605.718	5	100	0	0	0	0.556253	0	0.652121	38.4858	9.96394	0.141547	0.427073	0.123027	0.410539	0.442973	0.491683	0.425262	1481.16	99.2801	0.277322	57003.5	989.221	-0.185672	1.5853	0.998431	1.91961	3.60568	1.51768	0.708018	0.706194	0.606874	0.794798	-0.513417	-0.858139	0.80754	6.20369	3.15657	8.13737	81.8626	116.963	0.376227	2.03684	0.339474	0.418806	0.162867	0.90779	4.14873
1353	882.413	577.656	5	100	0	0	0	0.746507	0	0.67934	28.3956	33.7318	0.252675	0.458967	0.259938	0.497949	0.499464	0.452165	0.461503	806.31	1137.83	0.313517	22895.7	38381.2	-0.167913	1.45325	1.52804	1.97258	3.76947	2.10813	-0.120969	-0.992656	0.62828	0.777988	0.735036	-0.678029	0.824221	5.32875	5.80791	14.6359	75.3641	99.1304	0.502668	2.42116	0.403526	0.455566	0.1157	1.02173	5.86201
673	921.75	602.754	5	100	0	0	0	2.7592	1	0.618624	2.22755	80.5313	0.206552	0.0258591	0.227105	0.115781	0.482338	0.494677	0.382696	4.96198	6485.29	0.236745	11.0531	522269	-0.208573	0.347827	1.90596	1.85637	2.63354	1.76076	0.791978	-0.610549	0.579915	0.814677	-0.912808	0.408388	0.786527	1.4925	8.97392	11.9204	78.0796	106.403	0.45448	1.55231	0.258719	0.216829	0.191863	0.765291	2.40967
552	475.494	781.905	5	100	0	0	0	0.609306	0	0.617889	29.5098	21.2447	0.28346	0.408397	0.249988	0.430737	0.454054	0.494724	0.381787	870.828	451.337	0.235902	25698	9588.53	-0.20909	1.46997	1.32725	1.85501	3.35494	2.29631	-0.944302	-0.329081	0.579316	0.815103	0.679036	-0.734105	0.786059	5.43229	4.6092	16.4668	73.5332	94.3722	0.53241	2.32136	0.386893	0.419567	0.0979431	0.972668	5.38871
513	461.625	764.484	5	100	0	0	0	1.18018	1	0.341191	3.15023	41.315	0.0467074	0.475478	0.0429957	0.432666	0.439586	0.460098	0.116411	9.92395	1706.93	0.0397185	31.2627	70521.8	-0.467002	0.498342	1.61611	1.40662	1.85095	1.14789	-0.00863724	-0.999963	0.33461	0.942357	-0.456712	-0.889615	0.584116	1.77489	6.42767	2.67711	87.3229	133.086	0.216119	1.89753	0.316255	0.436126	0.210775	0.906772	3.60062
262	495.645	755.679	5	100	0	0	0	0.5284	0	0.629623	28.6133	16.3833	0.223305	0.461656	0.210538	0.473893	0.484485	0.488932	0.396425	818.721	268.413	0.249598	23426.3	4397.48	-0.200919	1.45657	1.2144	1.8769	3.42854	1.92679	-0.332512	-0.943099	0.58884	0.80825	-0.62516	-0.780496	0.793488	5.34914	4.04763	12.9032	77.0968	103.741	0.472552	2.34281	0.390468	0.467774	0.134818	1.00283	5.48875
614	483.908	718.382	5	100	0	0	0	0.484799	0	0.457455	71.9548	23.4345	0.26025	0.458575	0.263025	0.496555	0.497435	0.460025	0.209265	5177.49	549.176	0.0957294	372545	12869.7	-0.339652	1.85706	1.36986	1.58005	2.48216	2.15852	0.297269	-0.954794	0.441666	0.897179	-0.99189	-0.1271	0.676354	8.48262	4.84092	15.0849	74.9151	97.9526	0.510147	2.43587	0.405978	0.4593	0.113074	1.02608	5.93344
1451	461	750.844	5	100	0	0	0	0.691941	0	0.436287	2.72818	41.588	0.0167697	0.467249	0.0151993	0.416841	0.423501	0.450784	0.190346	7.44297	1729.56	0.0830456	20.3058	71929	-0.360228	0.435873	1.61897	1.54695	2.12181	1.05125	0.401737	-0.915755	0.422577	0.906327	-0.679657	-0.73353	0.66052	1.65172	6.44888	0.960878	89.0391	138.369	0.129498	1.79034	0.298391	0.420171	0.219512	0.880426	3.20533
249	465.19	755.666	5	100	0	0	0	0.899755	0	0.594761	31.0261	6.1677	0.0876454	0.44997	0.0778721	0.419312	0.440487	0.477755	0.353741	962.619	38.0405	0.210391	29866.3	234.623	-0.225658	1.49173	0.790123	1.8126	3.21282	1.29503	-0.380028	0.924975	0.560311	0.828282	-0.115229	0.993339	0.771207	5.57011	2.48349	5.02816	84.9718	126.016	0.29605	1.95304	0.325507	0.429899	0.188993	0.902397	3.81437
1333	835.7	911.4	5	100	0	0	0	0.730092	0	0.543625	27.5082	13.0871	0.0158211	0.48607	0.0148629	0.433622	0.432116	0.443824	0.295528	756.701	171.272	0.160656	20815.5	2241.46	-0.264701	1.43946	1.11684	1.72224	2.90426	1.04852	0.693355	-0.720597	0.517242	0.855839	0.497513	0.867457	0.737309	5.24483	3.61761	0.90652	89.0935	138.538	0.125782	1.82632	0.304386	0.432869	0.22475	0.899148	3.33543
1502	862.875	920.368	5	100	0	0	0	0.842791	0	0.618601	2.22755	43.8661	0.456868	0.292793	0.484174	0.43793	0.346392	0.259822	0.382667	4.96198	1924.23	0.236718	11.0531	84408.7	-0.208589	0.347827	1.64213	1.85633	2.63346	3.08821	0.791978	-0.610549	0.579896	0.814691	-0.115936	0.993257	0.786512	1.4925	6.62315	27.1852	62.8148	68.8655	0.67592	2.27798	0.379663	0.392161	0.0930521	0.952973	5.18919
350	805.598	843.084	5	100	0	0	0	0.647969	0	0.638645	46.4594	28.8528	0.196431	0.440356	0.217841	0.473684	0.488961	0.408687	0.407867	2158.48	832.484	0.260482	100281	24019.5	-0.19474	1.66707	1.46019	1.89391	3.52532	1.79115	0.616658	-0.787232	0.596108	0.802904	-0.54674	-0.837302	0.799153	6.81611	5.37148	11.3283	78.6717	108.022	0.443205	2.22596	0.370993	0.424521	0.130093	0.954169	4.9549
701	833.415	869.711	5	100	0	0	0	0.557323	0	0.708094	25.7857	33.0075	0.390272	0.395267	0.39433	0.486497	0.457847	0.408657	0.501397	664.902	1089.5	0.355036	17145	35961.5	-0.149909	1.41138	1.51861	2.03012	3.9683	3.12702	0.607539	0.79429	0.650387	0.759603	0.999784	-0.0207756	0.841483	5.07796	5.74522	22.9714	67.0286	78.4147	0.624718	2.53287	0.422145	0.401962	0.0402734	1.03795	6.41543
1183	831.75	883.346	5	100	0	0	0	0.629318	0	0.618624	2.22755	28.0945	0.387914	0.384283	0.354478	0.445448	0.43661	0.451162	0.382696	4.96198	789.301	0.236745	11.0531	22175	-0.208573	0.347827	1.44862	1.85637	2.63354	2.66345	0.791978	-0.610549	0.579915	0.814677	0.178866	-0.983873	0.786527	1.4925	5.30042	22.8248	67.1752	78.7582	0.622827	2.4599	0.409983	0.412262	0.0397261	1.00817	6.05108
661	679.093	949.563	5	100	0	0	0	0.655518	0	0.611033	29.001	27.1537	0.371452	0.406489	0.353183	0.471734	0.458621	0.449525	0.373361	841.058	737.323	0.228136	24391.5	20021.1	-0.213935	1.46241	1.43383	1.84233	3.30967	2.96122	-0.664382	-0.747394	0.573714	0.819056	0.900376	-0.435112	0.781686	5.38526	5.21092	21.8052	68.1948	81.1671	0.609469	2.511	0.418501	0.428007	0.0490514	1.03096	6.30514
460	706.355	921.188	5	100	0	0	0	0.537995	0	0.562332	19.9238	23.2073	0.276991	0.454501	0.278091	0.49736	0.496631	0.461352	0.316217	396.958	538.579	0.177819	7908.91	12499	-0.250007	1.29937	1.36562	1.75476	2.98558	2.248	0.87923	0.476397	0.533161	0.846014	-0.93777	-0.347257	0.749888	4.46361	4.8174	16.0807	73.9193	95.3659	0.526299	2.46493	0.410821	0.457927	0.10473	1.03319	6.07586
699	673.781	792.275	5	100	0	0	0	0.53365	0	0.568085	40.5269	34.7685	0.112049	0.430368	0.128638	0.431891	0.458137	0.375647	0.322721	1642.43	1208.85	0.183333	66562.6	42029.9	-0.245587	1.60774	1.54119	1.76488	3.06628	1.39675	0.30868	-0.951166	0.538019	0.842933	-0.209419	-0.977826	0.753714	6.36607	5.89648	6.43344	83.5666	121.883	0.334737	1.93673	0.322788	0.403007	0.159183	0.867092	3.75092
1035	649.889	818.413	5	100	0	0	0	0.560541	0	0.708588	40.983	19.2026	0.0396753	0.494025	0.0381911	0.448427	0.446581	0.446551	0.502097	1679.61	368.74	0.35578	68835.3	7080.76	-0.149606	1.6126	1.28336	2.03112	4.02727	1.12599	-0.141816	-0.989893	0.650762	0.759282	0.345756	0.938325	0.841777	6.4018	4.38208	2.27382	87.7262	134.318	0.199187	1.91345	0.318908	0.446566	0.217627	0.920338	3.66129
1205	624.642	819.88	5	100	0	0	0	0.764796	0	0.335145	18.0967	31.9423	0.334846	0.385361	0.293333	0.421549	0.438867	0.481808	0.112322	327.491	1020.31	0.0376442	5926.5	32591.1	-0.474767	1.2576	1.50437	1.39814	1.93112	2.65446	-0.683726	0.729739	0.328906	0.944363	0.502401	0.864635	0.578917	4.25402	5.65175	19.5632	70.4368	86.5918	0.578659	2.35576	0.392627	0.403455	0.0695394	0.974226	5.54962
1010	611.081	802.019	5	100	0	0	0	0.556248	0	0.528889	13.2721	24.2939	0.340751	0.397383	0.30512	0.438983	0.448471	0.478303	0.279724	176.149	590.194	0.147943	2337.86	14338.1	-0.276635	1.12294	1.3855	1.69705	2.76555	2.67305	0.648589	0.761139	0.504574	0.863368	-0.743869	0.668325	0.727248	3.64309	4.92888	19.9226	70.0774	85.7103	0.583739	2.40901	0.401502	0.418183	0.0670916	0.994851	5.80333
813	625.667	794.915	5	100	0	0	0	0.654284	0	0.601899	27.0992	24.9001	0.30102	0.438826	0.285226	0.478037	0.480862	0.478711	0.362282	734.367	620.015	0.218057	19900.7	15438.4	-0.220476	1.43296	1.3962	1.82558	3.24671	2.41714	0.922741	-0.38542	0.566209	0.824262	-0.230548	0.973061	0.775822	5.20569	4.99	17.5189	72.4811	91.6911	0.548653	2.46268	0.410447	0.458431	0.0923543	1.02638	6.0648
1193	631.875	807.352	5	100	0	0	0	0.819961	0	0.618611	2.22755	38.2191	0.0571788	0.439747	0.0500024	0.401916	0.42518	0.469055	0.38268	4.96198	1460.7	0.23673	11.0531	55826.6	-0.208582	0.347827	1.58228	1.85635	2.6335	1.18175	0.791978	-0.610549	0.579904	0.814685	0.49687	0.867825	0.786518	1.4925	6.18216	3.27789	86.7221	131.261	0.239121	1.84308	0.30718	0.413548	0.197645	0.872625	3.39694
596	661.5	853.035	5	100	0	0	0	0.833197	0	0.786411	2.72818	28.6619	0.121156	0.446235	0.136149	0.447728	0.467732	0.392115	0.618442	7.44297	821.505	0.48635	20.3058	23545.9	-0.10435	0.435873	1.4573	2.1955	3.39022	1.41427	0.401737	-0.915755	0.707823	0.70639	-0.377936	-0.925832	0.886798	1.65172	5.35368	6.95882	83.0412	120.355	0.348075	2.01112	0.335186	0.419175	0.162007	0.897401	4.04458
904	652.631	896.466	5	100	0	0	0	0.488622	0	0.558167	61.2267	23.5357	0.103247	0.477133	0.110709	0.462695	0.471068	0.417403	0.31155	3748.71	553.929	0.173897	229521	13037.1	-0.253236	1.78694	1.37173	1.74747	3.023	1.36053	-0.99941	-0.03435	0.529632	0.848227	-0.999656	-0.0262419	0.747106	7.82475	4.85136	5.92618	84.0738	123.367	0.321321	2.04226	0.340376	0.440049	0.182019	0.927787	4.17081
613	666.292	864.065	5	100	0	0	0	0.497577	0	0.577935	23.8358	22.2537	0.139653	0.48357	0.145237	0.479379	0.4852	0.442176	0.334009	568.145	495.227	0.193035	13542.2	11020.6	-0.238121	1.37723	1.3474	1.78235	3.09104	1.51276	-0.962735	0.270445	0.546295	0.837593	-0.259545	-0.965731	0.76022	4.88219	4.71738	8.02777	81.9722	117.276	0.373702	2.17522	0.362536	0.460778	0.171223	0.967047	4.73156
342	616.396	866.732	5	100	0	0	0	0.54903	0	0.631913	56.3976	30.0493	0.369633	0.409173	0.373286	0.491333	0.4703	0.423475	0.399314	3180.69	902.96	0.252332	179383	27133.3	-0.199343	1.75126	1.47783	1.88121	3.48972	2.96945	-0.150494	0.988611	0.590689	0.806899	-0.97923	0.202754	0.79493	7.50983	5.48172	21.693	68.307	81.4344	0.607975	2.5372	0.422867	0.416324	0.0498348	1.04178	6.43738
343	648.575	845.699	5	100	0	0	0	0.5151	0	0.537832	23.042	29.7684	0.239117	0.431851	0.263847	0.48358	0.493643	0.410321	0.289263	530.934	886.158	0.155575	12233.8	26379.5	-0.269353	1.36252	1.47376	1.71229	2.86088	2.0226	-0.867847	-0.496832	0.512275	0.858821	-0.997058	-0.0766549	0.73337	4.80021	5.45604	13.8344	76.1656	101.25	0.488996	2.32236	0.38706	0.421086	0.109811	0.979379	5.39335
636	650.88	860.327	5	100	0	0	0	0.725348	0	0.403853	11.1377	28.9387	0.13723	0.446274	0.153678	0.454482	0.473731	0.397278	0.163097	124.048	837.448	0.0658673	1381.61	24234.7	-0.393777	1.0468	1.46148	1.49758	2.18026	1.49898	-0.989917	0.141648	0.392964	0.919554	-0.61656	-0.787308	0.635494	3.33732	5.37947	7.88759	82.1124	117.678	0.370446	2.06267	0.343779	0.421776	0.155763	0.911271	4.25462
344	673.121	844.115	5	100	0	0	0	0.534817	0	0.616637	26.1202	30.7722	0.20064	0.427432	0.226315	0.467202	0.485873	0.39728	0.380241	682.265	946.928	0.234471	17820.9	29139.1	-0.20997	1.41698	1.48816	1.85269	3.33619	1.8103	0.834629	0.550813	0.578295	0.815828	-0.60018	0.799865	0.785262	5.11079	5.54727	11.5744	78.4256	107.348	0.447929	2.20474	0.367457	0.412356	0.123456	0.941464	4.86089
1424	691.125	832.034	5	100	0	0	0	0.687423	0	0.618601	2.22755	74.302	0.290411	0.440349	0.30382	0.499518	0.496617	0.436176	0.382667	4.96198	5520.79	0.236718	11.0531	410206	-0.208589	0.347827	1.871	1.85633	2.63346	2.15565	0.791978	-0.610549	0.579896	0.814691	-0.889488	0.456958	0.786512	1.4925	8.61986	16.8826	73.1174	93.3081	0.538898	2.46689	0.411149	0.438262	0.0924013	1.02808	6.08555
1348	694.875	822.941	5	100	0	0	0	0.720908	0	0.618601	2.22755	79.547	0.487514	0.274286	0.470918	0.396386	0.358768	0.257691	0.382667	4.96198	6327.73	0.236718	11.0531	503352	-0.208589	0.347827	1.90062	1.85633	2.63346	3.30001	0.791978	-0.610549	0.579896	0.814691	-0.845331	-0.534244	0.786512	1.4925	8.91891	29.1773	60.8227	64.5667	0.698222	2.24556	0.37426	0.377577	0.0964178	0.941758	5.04255
1206	683.281	820.851	5	100	0	0	0	0.656925	0	0.670216	27.8666	17.3849	0.0794753	0.496243	0.0799394	0.465675	0.46596	0.443676	0.449189	776.547	302.235	0.301054	21639.7	5254.32	-0.173785	1.44508	1.24017	1.95466	3.70229	1.26702	0.39653	-0.918022	0.621155	0.783688	-0.994372	0.105941	0.818667	5.27888	4.16952	4.55841	85.4416	127.414	0.281914	2.03097	0.338495	0.454676	0.201153	0.943284	4.12483
345	713.641	842.45	5	100	0	0	0	0.506872	0	0.575763	52.7138	34.447	0.434849	0.361981	0.422905	0.459434	0.414954	0.385367	0.331503	2778.74	1186.6	0.190867	146478	40874.7	-0.239756	1.72192	1.53715	1.77849	3.12391	3.589	0.63906	-0.769157	0.544475	0.838777	0.110294	-0.993899	0.75879	7.26043	5.86916	25.7757	64.2243	71.9907	0.659431	2.47949	0.413248	0.418929	0.034933	1.01526	6.14787
1094	722.885	879.749	5	100	0	0	0	1.01208	1	0.686268	5.67915	17.5173	0.0919554	0.484919	0.0869644	0.455534	0.461978	0.468984	0.470964	32.2527	306.856	0.323207	183.168	5375.29	-0.163506	0.754283	1.24347	1.98629	3.40267	1.31006	-0.567968	0.82305	0.633654	0.773616	-0.971684	0.236285	0.828413	2.3831	4.18537	5.27611	84.7239	125.282	0.303241	2.05033	0.341722	0.458756	0.195653	0.944482	4.20387
1181	712.176	895.632	5	100	0	0	0	0.667844	0	0.612682	31.5022	21.6588	0.167348	0.48016	0.161707	0.476762	0.484502	0.477447	0.375379	992.389	469.104	0.229988	31262.4	10160.2	-0.212765	1.49834	1.33563	1.84537	3.32672	1.64145	0.0861665	0.996281	0.575064	0.818109	0.326264	-0.945279	0.78274	5.61268	4.6539	9.63366	80.3663	112.726	0.409082	2.24793	0.374654	0.477105	0.162796	0.987273	5.05317
1006	886.125	794.362	5	100	0	0	0	1.85207	1	0.618611	2.22755	89.8335	0.493412	0.265717	0.457372	0.375016	0.349325	0.266392	0.38268	4.96198	8070.06	0.23673	11.0531	724962	-0.208582	0.347827	1.95344	1.85635	2.6335	3.3414	0.791978	-0.610549	0.579904	0.814685	0.955893	-0.293713	0.786518	1.4925	9.47805	29.5651	60.4349	63.746	0.702433	2.20723	0.367872	0.362171	0.0947622	0.925678	4.87188
1139	860.25	802.806	5	100	0	0	0	1.48359	1	0.618624	2.22755	62.3687	0.432981	0.23384	0.498538	0.40884	0.373185	0.221937	0.382696	4.96198	3889.85	0.236745	11.0531	242605	-0.208573	0.347827	1.79497	1.85637	2.63354	2.94841	0.791978	-0.610549	0.579915	0.814677	-0.446771	0.894648	0.786527	1.4925	7.89739	25.6569	64.3431	72.2573	0.658013	2.16932	0.361554	0.391012	0.111393	0.919982	4.70595
1171	858.75	807.222	5	100	0	0	0	1.14181	1	0.428706	3.52206	62.3348	0.433696	0.24071	0.4975	0.413722	0.368471	0.212983	0.183789	12.4049	3885.63	0.0787914	43.6908	242210	-0.36784	0.546797	1.79473	1.53527	2.14765	3.16233	-0.371354	-0.928491	0.415694	0.909504	-0.476837	0.878992	0.654756	1.87672	7.89524	25.7023	64.2977	72.1552	0.658556	2.16708	0.36118	0.391096	0.112366	0.919695	4.69624
1039	860.348	803.258	5	100	0	0	0	1.04006	1	0.371422	13.0839	52.2467	0.484663	0.17212	0.428287	0.272838	0.429429	0.34316	0.137954	171.188	2729.72	0.0512393	2239.81	142619	-0.430132	1.11674	1.71806	1.44979	2.05924	4.01334	0.494735	0.869044	0.362941	0.931812	0.916953	-0.398996	0.609444	3.61717	7.22819	28.9904	61.0096	64.9642	0.696177	2.1305	0.355083	0.385723	0.11667	0.908054	4.53902
1061	814.191	812.506	5	100	0	0	0	0.582211	0	0.422556	24.9048	28.8885	0.0343722	0.469091	0.0377703	0.428574	0.436222	0.380857	0.178554	620.249	834.545	0.0754489	15447.2	24108.8	-0.374116	1.39628	1.46072	1.52586	2.29564	1.10833	-0.225972	0.974134	0.410093	0.912044	-0.576277	-0.817254	0.650043	4.99047	5.3748	1.96977	88.0302	135.251	0.185397	1.78689	0.297814	0.404716	0.2047	0.861204	3.19296
565	940.75	511.388	5	100	0	0	0	1.15541	1	0.436291	2.72818	73.923	0.349148	0.0827075	0.370467	0.214793	0.487334	0.462346	0.19035	7.44297	5464.61	0.0830479	20.3058	403960	-0.360224	0.435873	1.86878	1.54696	2.12183	2.52119	0.401737	-0.915755	0.422581	0.906325	-0.995436	0.0954272	0.660523	1.65172	8.59785	20.4352	69.5648	84.461	0.590887	1.9668	0.327799	0.359808	0.154059	0.873719	3.86828
439	920.679	525.391	5	100	0	0	0	0.628534	0	0.608703	38.3887	36.6294	0.209151	0.418	0.238043	0.464429	0.484511	0.390655	0.370519	1473.69	1341.71	0.225536	56573.1	49146.1	-0.215595	1.5842	1.56383	1.83805	3.31482	1.85991	0.636219	0.771508	0.571804	0.82039	-0.877062	0.480377	0.780194	6.19586	6.05222	12.0726	77.9274	105.988	0.45733	2.20479	0.367465	0.404327	0.116625	0.937117	4.86109
738	943.289	538.5	5	100	0	0	0	0.912185	1	0.561366	29.8441	35.7817	0.240268	0.409002	0.273304	0.470579	0.48654	0.388325	0.315132	890.67	1280.33	0.176904	26581.3	45812.4	-0.250754	1.47486	1.55366	1.75307	3.01019	2.03463	-0.999999	-0.00103021	0.532343	0.846529	-0.940528	-0.339717	0.749244	5.46298	5.98178	13.9024	76.0976	101.069	0.490171	2.26802	0.378003	0.398663	0.101342	0.953241	5.14391
443	973.431	517.333	5	100	0	0	0	0.522337	0	0.563919	33.4873	16.8589	0.183584	0.479642	0.179358	0.483048	0.489477	0.475865	0.318005	1121.4	284.223	0.179329	37552.6	4791.68	-0.248783	1.52488	1.22683	1.75755	3.03181	1.71924	0.877306	-0.479932	0.534503	0.845167	-0.913146	-0.407632	0.750945	5.78682	4.10596	10.5786	79.4214	110.091	0.428467	2.29097	0.381829	0.477753	0.155267	0.997647	5.24856
659	947.719	518.479	5	100	0	0	0	1.52802	1	0.443075	6.30045	35.6115	0.245961	0.412469	0.277943	0.47474	0.488286	0.392542	0.196315	39.6957	1268.18	0.0869825	250.101	45161.8	-0.353523	0.799372	1.55159	1.55749	2.28857	2.0248	0.0172638	0.999851	0.42872	0.903438	-0.869397	-0.494114	0.665639	2.51007	5.96754	14.2386	75.7614	100.178	0.495945	2.29194	0.38199	0.402505	0.100271	0.96217	5.25299
708	946.36	521.645	5	100	0	0	0	1.62093	1	0.498928	6.30045	76.329	0.246987	0.0392863	0.273119	0.144922	0.484371	0.489359	0.248929	39.6957	5826.12	0.124198	250.101	444702	-0.301962	0.799372	1.88269	1.64695	2.52095	2.03561	0.0172638	0.999851	0.478484	0.878096	0.802084	0.597211	0.706348	2.51007	8.73665	14.2993	75.7007	100.018	0.496978	1.67804	0.279674	0.260053	0.180513	0.795129	2.81583
357	803.106	683.139	5	100	0	0	0	0.55481	0	0.701344	24.9048	30.9045	0.0217968	0.459719	0.024313	0.415255	0.425414	0.366588	0.491883	620.249	955.088	0.344979	15447.2	29516.5	-0.154069	1.39628	1.49002	2.01646	3.91286	1.06747	-0.225972	0.974134	0.645245	0.763976	-0.489422	0.872047	0.837463	4.99047	5.55918	1.24896	88.751	137.475	0.147637	1.71309	0.285514	0.390922	0.205474	0.836785	2.93466
879	795	700.182	5	100	0	0	0	0.660716	0	0.618624	2.22755	45.6753	0.123511	0.42698	0.142115	0.434488	0.46173	0.376577	0.382696	4.96198	2086.23	0.236745	11.0531	95289.3	-0.208573	0.347827	1.65968	1.85637	2.63354	1.41931	0.791978	-0.610549	0.579915	0.814677	0.992542	-0.121903	0.786527	1.4925	6.75835	7.09478	82.9052	119.961	0.351441	1.9654	0.327567	0.401779	0.153459	0.872667	3.8628
877	769.904	702.58	5	100	0	0	0	0.709207	0	0.272534	8.03153	14.4561	0.198745	0.457145	0.183117	0.459126	0.475242	0.493422	0.0742748	64.5055	208.979	0.0202424	518.078	3021.02	-0.564579	0.904798	1.16005	1.31329	1.69415	1.77559	0.98428	-0.176617	0.269173	0.963092	0.949571	-0.313554	0.522048	2.834	3.80212	11.4636	78.5364	107.651	0.445808	2.2668	0.3778	0.458136	0.14542	0.980882	5.13837
948	781.508	721.946	5	100	0	0	0	0.584045	0	0.605109	44.9666	18.8952	0.164978	0.484453	0.166314	0.485419	0.490285	0.461065	0.366157	2022	357.029	0.221565	90922.2	6746.13	-0.218166	1.65289	1.27635	1.83145	3.30075	1.63048	0.832886	0.553444	0.568852	0.82244	0.0456282	0.998958	0.777888	6.70571	4.34686	9.49596	80.504	113.113	0.406175	2.25251	0.375419	0.472759	0.162806	0.989022	5.07382
589	785.685	694.419	5	100	0	0	0	0.684401	0	0.630524	21.1909	25.9287	0.387423	0.358173	0.337892	0.409126	0.413744	0.456465	0.397561	449.054	672.297	0.250671	9515.86	17431.8	-0.200298	1.32615	1.41378	1.87859	3.40284	3.07989	0.717529	-0.696528	0.589568	0.807719	0.714535	0.6996	0.794055	4.60336	5.09202	22.7942	67.2058	78.8298	0.622433	2.36282	0.393804	0.398274	0.0424151	0.96927	5.58293
285	689.287	668.103	5	100	0	0	0	0.552342	0	0.613412	42.3823	34.8703	0.33709	0.415454	0.355043	0.49732	0.484085	0.414929	0.376274	1796.26	1215.94	0.230811	76129.6	42400.1	-0.212248	1.62718	1.54246	1.84672	3.35121	2.70137	-0.999574	-0.0291967	0.575661	0.817689	-0.307706	-0.951482	0.783206	6.51017	5.90511	19.6997	70.3003	86.2565	0.580595	2.50392	0.41732	0.415191	0.0650877	1.03253	6.26962
1266	700.915	651.149	5	100	0	0	0	0.624654	0	0.338021	16.8176	31.0214	0.264921	0.450955	0.276414	0.49854	0.499261	0.442839	0.114258	282.832	962.327	0.0386217	4756.55	29852.7	-0.471056	1.22576	1.49166	1.40217	1.94007	2.17258	-0.895537	-0.444987	0.331621	0.943413	-0.384371	0.923179	0.581396	4.10093	5.56969	15.3623	74.6377	97.2287	0.514705	2.43293	0.405488	0.446897	0.107083	1.02169	5.91915
537	698.712	700.136	5	100	0	0	0	0.527703	0	0.636901	45.1597	34.8366	0.399196	0.391948	0.392808	0.478131	0.449592	0.416337	0.405643	2039.4	1213.59	0.258354	92098.6	42277.3	-0.195928	1.65475	1.54204	1.89061	3.51165	3.23414	0.923614	0.383325	0.594707	0.803943	-0.275472	-0.961309	0.798061	6.7201	5.90225	23.5279	66.4721	77.118	0.63182	2.52801	0.421335	0.407767	0.0352612	1.03506	6.39084
980	725.569	712.945	5	100	0	0	0	0.553367	0	0.454407	14.0882	27.3187	0.29257	0.444046	0.301471	0.499852	0.496267	0.444383	0.206486	198.477	746.311	0.0938286	2796.19	20388.3	-0.342555	1.14886	1.43646	1.57524	2.4119	2.34181	0.998801	0.0489474	0.43893	0.898521	0.81668	-0.577091	0.674097	3.75343	5.22673	17.0119	72.9881	92.9783	0.540897	2.47859	0.413098	0.444214	0.0931316	1.03309	6.1434
818	757.659	699.945	5	100	0	0	0	0.825556	0	0.619461	9.04834	22.0909	0.293558	0.401929	0.257693	0.426556	0.450067	0.493068	0.383732	81.8725	488.008	0.237707	740.81	10780.5	-0.207986	0.956569	1.34421	1.85793	3.18846	2.32138	0.36761	-0.92998	0.580596	0.814192	-0.0995861	-0.995029	0.787058	3.00805	4.7001	17.0711	72.9289	92.8275	0.54181	2.32287	0.387145	0.414242	0.0921596	0.970441	5.39573
776	739.726	710.696	5	100	0	0	0	0.612976	0	0.639571	33.0022	26.2476	0.199063	0.460826	0.212843	0.48644	0.494896	0.432195	0.409051	1089.15	688.937	0.261617	35944.2	18082.9	-0.194111	1.51854	1.41909	1.89567	3.50722	1.80249	0.99988	-0.0154765	0.596851	0.802352	0.897849	0.440304	0.799732	5.74475	5.12324	11.4822	78.5178	107.6	0.446165	2.28626	0.381044	0.446511	0.137449	0.982663	5.227
1067	729.393	641.475	5	100	0	0	0	0.584894	0	0.547289	36.3644	29.7617	0.346277	0.384618	0.305087	0.425092	0.438047	0.477119	0.299525	1322.37	885.759	0.163927	48087.2	26361.7	-0.261783	1.56068	1.47366	1.72856	2.93982	2.76574	-0.972261	0.233898	0.520374	0.853938	-0.996522	-0.0833335	0.73979	6.03029	5.45543	20.2598	69.7402	84.8876	0.588453	2.37624	0.39604	0.404855	0.063343	0.980381	5.64652
302	739.138	673.776	5	100	0	0	0	0.558211	0	0.669251	46.9375	36.1218	0.44819	0.345905	0.441332	0.453983	0.397145	0.357859	0.447897	2203.13	1304.78	0.299755	103409	47131.2	-0.174411	1.67152	1.55777	1.95277	3.74224	3.72729	0.185312	-0.98268	0.620399	0.784287	-0.999979	-0.00651547	0.818078	6.85109	6.01014	26.6276	63.3724	70.0935	0.66947	2.44441	0.407402	0.419239	0.0475947	1.00359	5.97516
833	704.117	127.952	5	100	0	0	0	0.669354	0	0.473605	40.1269	19.963	0.135775	0.482501	0.131048	0.468702	0.475752	0.467584	0.224302	1610.17	398.521	0.10623	64611.1	7955.68	-0.324584	1.60344	1.30023	1.60577	2.55017	1.49663	0.654714	-0.755876	0.456097	0.88993	0.897225	0.441574	0.68819	6.33458	4.468	7.80344	82.1966	117.919	0.368477	2.16136	0.360227	0.468143	0.175779	0.965957	4.67149
962	726.125	120.437	5	100	0	0	0	0.856257	0	0.383497	12.7963	6.02179	0.0665233	0.463097	0.0600934	0.426348	0.440472	0.469764	0.14707	163.745	36.262	0.0564009	2095.33	218.362	-0.416238	1.10708	0.779726	1.46741	2.10576	1.21699	0.227909	0.973682	0.374166	0.927362	-0.258429	0.96603	0.619271	3.57719	2.45393	3.81432	86.1857	129.643	0.257921	1.9263	0.32105	0.43341	0.200262	0.904965	3.71062
1332	733.8	143.414	5	100	0	0	0	0.55166	0	0.404332	3.52206	47.7711	0.493169	0.230677	0.465684	0.350978	0.397976	0.293816	0.163484	12.4049	2282.08	0.066102	43.6908	109017	-0.393262	0.546797	1.67917	1.4983	2.06554	3.61879	-0.371354	-0.928491	0.393405	0.919365	-0.602963	-0.797769	0.635871	1.87672	6.91166	29.5491	60.4509	63.7798	0.70226	2.2323	0.37205	0.374477	0.100658	0.938716	4.98316
96	734.566	166.621	5	100	0	0	0	0.606784	0	0.429832	20.2939	18.9202	0.0727994	0.497009	0.0728367	0.463704	0.463429	0.444074	0.184756	411.842	357.974	0.0794138	8357.89	6772.94	-0.366701	1.30737	1.27693	1.537	2.32062	1.24208	0.992016	0.126116	0.416718	0.909036	0.0705853	0.997506	0.655616	4.50488	4.34974	4.17479	85.8252	128.56	0.269814	2.01385	0.335642	0.453751	0.204293	0.940538	4.0556
1331	711.608	149.284	5	100	0	0	0	0.568176	0	0.350755	9.58103	40.9898	0.357501	0.398673	0.380565	0.493703	0.474055	0.396422	0.123029	91.7961	1680.16	0.0431531	879.502	68869.6	-0.454996	0.981412	1.61268	1.42014	1.96744	2.78794	-0.155617	-0.987817	0.343607	0.939114	-0.148544	-0.988906	0.592246	3.09532	6.40233	20.9468	69.0532	83.2233	0.597914	2.50092	0.41682	0.397547	0.0543423	1.0282	6.2546
94	720.373	174.252	5	100	0	0	0	0.581958	0	0.486345	30.4612	15.9035	0.180767	0.458182	0.165751	0.454349	0.471481	0.492565	0.236531	927.885	252.921	0.115036	28264.5	4022.33	-0.313056	1.48375	1.20149	1.62636	2.60493	1.70417	-0.816156	0.577832	0.467398	0.884047	-0.194293	-0.980944	0.697384	5.51917	3.98792	10.4144	79.5856	110.547	0.425167	2.2231	0.370516	0.456265	0.153451	0.970272	4.94215
1371	724.875	146.142	5	100	0	0	0	1.00877	1	0.618621	2.22755	47.2818	0.488649	0.242028	0.475673	0.371258	0.395221	0.282529	0.382692	4.96198	2235.57	0.236741	11.0531	105702	-0.208575	0.347827	1.67469	1.85637	2.63353	3.29405	0.791978	-0.610549	0.579912	0.814679	-0.157255	-0.987558	0.786525	1.4925	6.87618	29.2518	60.7482	64.4086	0.699034	2.25536	0.375893	0.383239	0.0997012	0.947352	5.08664
1446	697.071	154.771	5	100	0	0	0	0.771689	0	0.376399	4.16736	57.3588	0.432663	0.181773	0.490786	0.356726	0.42541	0.322185	0.141676	17.3669	3290.03	0.0533268	72.3741	188712	-0.424352	0.619861	1.7586	1.45703	1.99459	3.21531	-0.855112	-0.518443	0.367574	0.929994	0.724378	0.689403	0.613514	2.04141	7.57356	25.6367	64.3633	72.3027	0.657771	2.20954	0.368257	0.391068	0.10905	0.93442	4.88208
1468	692.625	156.534	5	100	0	0	0	1.04361	1	0.618621	2.22755	58.653	0.49055	0.17856	0.429521	0.276758	0.418801	0.332216	0.382692	4.96198	3440.17	0.236741	11.0531	201777	-0.208575	0.347827	1.76829	1.85637	2.63353	3.31296	0.791978	-0.610549	0.579912	0.814679	0.861014	-0.508581	0.786525	1.4925	7.65852	29.3767	60.6233	64.144	0.700393	2.12641	0.354401	0.375509	0.114689	0.905189	4.5216
92	660.313	186.441	5	100	0	0	0	0.655891	0	0.649001	69.875	15.563	0.0250897	0.480094	0.0232671	0.430835	0.433126	0.450312	0.421202	4882.52	242.207	0.273361	341166	3769.47	-0.187755	1.84432	1.19209	1.91363	3.61849	1.07801	0.688894	0.724862	0.604391	0.796688	0.144456	-0.989511	0.805606	8.35913	3.945	1.43768	88.5623	136.891	0.158397	1.84272	0.307121	0.43198	0.219873	0.898698	3.39563
1469	704.25	155.885	5	100	0	0	0	0.932827	1	0.618624	2.22755	77.6015	0.408876	0.363056	0.432111	0.480098	0.437037	0.35801	0.382696	4.96198	6021.99	0.236745	11.0531	467316	-0.208573	0.347827	1.88987	1.85637	2.63354	2.80611	0.791978	-0.610549	0.579915	0.814677	0.806564	-0.591147	0.786527	1.4925	8.80917	24.1342	65.8658	75.7176	0.639434	2.47919	0.413198	0.420494	0.046862	1.01753	6.14637
735	708.671	193.918	5	100	0	0	0	0.592595	0	0.660604	19.3553	24.6412	0.277282	0.452007	0.283216	0.499197	0.497926	0.452543	0.436398	374.628	607.189	0.288286	7251.03	14961.9	-0.180059	1.2868	1.39166	1.93596	3.58803	2.25038	0.484459	0.874814	0.613594	0.789622	-0.471985	0.881606	0.812775	4.39947	4.96399	16.0981	73.9019	95.3211	0.526576	2.46217	0.410362	0.452275	0.102907	1.03118	6.06229
93	700.361	171.285	5	100	0	0	0	0.52127	0	0.463486	24.8549	11.2808	0.0537069	0.439314	0.0469217	0.400657	0.423725	0.467802	0.214819	617.766	127.256	0.0995657	15354.5	1435.55	-0.333963	1.39541	1.05234	1.58961	2.48433	1.17353	-0.27428	0.96165	0.447069	0.894499	-0.959598	0.281374	0.680798	4.98547	3.35869	3.07866	86.9213	131.865	0.231747	1.83213	0.305354	0.412191	0.198767	0.870052	3.35669
1343	996.06	147.363	5	100	0	0	0	0.719091	0	0.563953	7.87556	28.9152	0.207545	0.475028	0.203817	0.487632	0.493328	0.475523	0.318043	62.0244	836.089	0.179361	488.477	24175.7	-0.248757	0.896281	1.46113	1.75761	2.86491	1.82656	0.999767	-0.0215767	0.534531	0.845149	-0.59789	-0.801578	0.750968	2.80634	5.37729	11.9785	78.0215	106.244	0.455571	2.34287	0.390479	0.475275	0.143321	1.00874	5.48905
1301	994.642	68.463	5	100	0	0	0	0.60587	0	0.538529	13.5496	21.4593	0.312782	0.412501	0.281925	0.446584	0.45938	0.486558	0.290013	183.592	460.502	0.156181	2487.59	9882.04	-0.268791	1.13193	1.33162	1.71348	2.8176	2.47018	0.832292	0.554338	0.512874	0.858464	0.507127	-0.861871	0.733845	3.68098	4.63242	18.227	71.773	89.9083	0.559269	2.39973	0.399955	0.429542	0.0835384	0.997335	5.7587
66	976.721	86.977	5	100	0	0	0	0.601524	0	0.575556	48.4716	22.3681	0.029839	0.48336	0.0319718	0.438575	0.439753	0.394689	0.331265	2349.5	500.332	0.190661	113884	11191.5	-0.239912	1.68549	1.34963	1.77812	3.11929	1.09346	-0.975219	-0.22124	0.544301	0.83889	-0.368088	-0.929791	0.758654	6.96215	4.72949	1.7099	88.2901	136.051	0.17274	1.81819	0.303031	0.416632	0.212646	0.88151	3.30581
652	905.25	100.026	5	100	0	0	0	1.14663	1	0.453221	2.72818	30.3708	0.0819032	0.494718	0.083563	0.466139	0.467113	0.43777	0.205409	7.44297	922.385	0.0930958	20.3058	28013.6	-0.34369	0.435873	1.48246	1.57337	2.17561	1.26861	0.401737	-0.915755	0.437864	0.899041	-0.864988	0.501792	0.673217	1.65172	5.51097	4.69797	85.302	126.998	0.286187	2.03121	0.338534	0.451955	0.19896	0.941042	4.1258
61	894.672	75.668	5	100	0	0	0	0.682842	0	0.504264	46.6991	16.2038	0.242498	0.408916	0.210945	0.418655	0.449987	0.498854	0.254282	2180.81	262.563	0.128225	101842	4254.52	-0.297342	1.66931	1.20962	1.65577	2.71218	2.04034	0.412129	-0.911125	0.483163	0.87553	-0.475768	-0.879571	0.710115	6.83367	4.02539	14.034	75.966	100.72	0.492441	2.22986	0.371643	0.413786	0.11698	0.94717	4.97225
62	908.25	85.303	5	100	0	0	0	0.701768	0	0.78644	2.72818	57.1549	0.463822	0.20555	0.4853	0.358585	0.42913	0.32132	0.618488	7.44297	3266.68	0.486404	20.3058	186707	-0.104334	0.435873	1.75705	2.19557	3.39033	3.2579	0.401737	-0.915755	0.707843	0.70637	0.569775	0.821801	0.886815	1.65172	7.56009	27.634	62.366	67.8849	0.681045	2.26371	0.377285	0.393857	0.104708	0.953352	5.12437
101	906	86.603	5	100	0	0	0	0.555769	0	0.786438	2.72818	41.7465	0.438173	0.318568	0.469836	0.457789	0.387915	0.296713	0.618485	7.44297	1742.77	0.4864	20.3058	72754.6	-0.104336	0.435873	1.62062	2.19556	3.39033	3.0724	0.401737	-0.915755	0.707842	0.706371	-0.786916	-0.61706	0.886813	1.65172	6.46115	25.9874	64.0126	71.5169	0.661946	2.36899	0.394832	0.413044	0.0734289	0.980976	5.61213
1102	796.488	62.059	5	100	0	0	0	0.546289	0	0.66868	34.6884	40.6701	0.301021	0.387602	0.341199	0.478427	0.4807	0.375521	0.447133	1203.29	1654.06	0.298989	41740	67270.7	-0.174782	1.54018	1.60928	1.95166	3.71384	2.43214	-0.130507	-0.991447	0.619951	0.784641	0.169778	-0.985482	0.817729	5.88969	6.37731	17.5189	72.4811	91.691	0.548654	2.36447	0.394078	0.381561	0.0727464	0.978901	5.59072
1407	771.31	72.119	5	100	0	0	0	0.880161	0	0.270659	8.48224	50.597	0.491001	0.262993	0.468524	0.382829	0.366813	0.260683	0.0732563	71.9484	2560.06	0.0198275	610.284	129531	-0.567578	0.928511	1.70412	1.31083	1.68975	3.97389	0.809052	-0.587737	0.267367	0.963595	0.325478	0.94555	0.520249	2.91243	7.11316	29.4064	60.5936	64.0812	0.700715	2.23284	0.37214	0.374821	0.0978736	0.937458	4.98559
56	725.994	89.889	5	100	0	0	0	0.668231	0	0.612239	59.25	12.901	0.0310247	0.448665	0.0274084	0.403681	0.420048	0.458759	0.374837	3510.56	166.436	0.22949	208001	2147.19	-0.213079	1.77269	1.11062	1.84456	3.36005	1.09724	0.426175	-0.904641	0.574701	0.818363	0.328419	0.944532	0.782457	7.6974	3.5918	1.77787	88.2221	135.841	0.176138	1.78959	0.298264	0.411864	0.209334	0.867682	3.20262
58	808.089	97.226	5	100	0	0	0	0.723658	0	0.296418	31.4629	27.9689	0.116677	0.450365	0.130492	0.448872	0.46726	0.39434	0.0878636	989.914	782.259	0.0260444	31145.6	21878.9	-0.528095	1.4978	1.44668	1.34503	1.79913	1.41523	0.0469562	0.998897	0.292096	0.956389	0.300707	-0.953717	0.544443	5.60918	5.28856	6.70036	83.2996	121.105	0.34158	2.00801	0.334668	0.421606	0.165395	0.899329	4.03209
702	792.116	106.869	5	100	0	0	0	0.831994	0	0.500976	13.2721	21.2596	0.185831	0.477563	0.190814	0.489488	0.494887	0.454386	0.250977	176.149	451.971	0.125733	2337.86	9608.71	-0.300183	1.12294	1.32756	1.65033	2.62612	1.72477	0.648589	0.761139	0.480282	0.877114	0.668023	-0.744141	0.707797	3.64309	4.61081	10.7096	79.2904	109.728	0.431081	2.29297	0.382162	0.465975	0.1508	0.994981	5.25771
727	762.431	109.479	5	100	0	0	0	0.574507	0	0.55095	15.2713	15.4062	0.247682	0.4244	0.220264	0.437473	0.461441	0.498188	0.303546	233.213	237.351	0.167239	3561.46	3656.68	-0.258888	1.18388	1.1877	1.7349	2.89658	2.05402	0.422918	-0.906168	0.523497	0.852028	0.297204	-0.954814	0.74226	3.90785	3.92507	14.3404	75.6596	99.9092	0.497677	2.28945	0.381575	0.430937	0.117375	0.970814	5.24157
57	772.923	89.427	5	100	0	0	0	0.651721	0	0.338424	34.4011	24.7365	0.152017	0.470181	0.162798	0.476056	0.48587	0.427605	0.114531	1183.44	611.894	0.03876	40711.5	15136.1	-0.470539	1.53657	1.39334	1.40274	1.95473	1.57033	0.155782	-0.987791	0.332001	0.943279	-0.385954	0.922518	0.581742	5.86525	4.97358	8.74383	81.2562	115.236	0.389894	2.17453	0.362421	0.448893	0.160083	0.957198	4.72857
434	649.989	325.754	5	100	0	0	0	0.478439	0	0.433254	32.2419	28.1362	0.116833	0.460936	0.128597	0.456583	0.470992	0.40449	0.187709	1039.54	791.646	0.0813257	33516.7	22273.9	-0.363257	1.50842	1.44927	1.54227	2.35142	1.41594	0.735208	0.677842	0.419826	0.907604	0.137695	-0.990475	0.65822	5.6782	5.30436	6.70936	83.2906	121.079	0.341808	2.03843	0.339738	0.430536	0.169723	0.914638	4.1552
952	747.35	376.124	5	100	0	0	0	0.462686	0	0.678932	37.074	24.7869	0.0856009	0.471958	0.0930689	0.452057	0.462075	0.404538	0.460949	1374.48	614.39	0.312953	50957.5	15228.8	-0.168174	1.56907	1.39422	1.97177	3.79409	1.29089	-0.585188	0.810898	0.627962	0.778244	-0.338988	0.940791	0.823973	6.08884	4.97864	4.91058	85.0894	126.365	0.292576	1.9693	0.328216	0.428297	0.186493	0.905678	3.87813
718	677.848	277.538	5	100	0	0	0	0.587423	0	0.389815	19.1621	15.3927	0.131013	0.465299	0.119974	0.44674	0.462693	0.485247	0.151956	367.186	236.935	0.0592346	7036.06	3647.07	-0.409141	1.28244	1.18731	1.47671	2.14703	1.4727	0.30748	0.951554	0.380017	0.924979	0.310067	-0.950715	0.624352	4.37745	3.92335	7.52813	82.4719	118.71	0.361957	2.11097	0.351828	0.454717	0.175779	0.9472	4.45618
1084	622.5	290.985	5	100	0	0	0	1.02596	1	0.453223	2.72818	61.0989	0.482107	0.166866	0.427317	0.268613	0.436757	0.350642	0.205411	7.44297	3733.08	0.093097	20.3058	228087	-0.343688	0.435873	1.78603	1.57338	2.17562	3.39034	0.401737	-0.915755	0.437865	0.899041	-0.986881	-0.161447	0.673218	1.65172	7.81658	28.8231	61.1769	65.3209	0.694339	2.1323	0.355384	0.38898	0.119118	0.910346	4.54671
1131	653.938	306.928	5	100	0	0	0	0.55843	0	0.455948	30.2979	20.719	0.214767	0.473612	0.215158	0.492223	0.496434	0.467067	0.207889	917.963	429.277	0.0947864	27812.3	8894.19	-0.341085	1.48141	1.31637	1.57767	2.45561	1.88372	-0.899239	0.437458	0.440314	0.897844	0.955735	-0.294228	0.675239	5.50435	4.55181	12.4019	77.5981	105.095	0.46343	2.35926	0.39321	0.47034	0.138508	1.01174	5.56611
929	623.911	294.683	5	100	0	0	0	0.550386	0	0.474047	22.4419	38.6734	0.472938	0.314618	0.449628	0.421492	0.351232	0.330678	0.224721	503.639	1495.63	0.106528	11302.6	57841.2	-0.324179	1.35106	1.58741	1.60648	2.53066	3.94751	-0.435642	-0.90012	0.456491	0.889728	0.827302	0.561757	0.688511	4.73729	6.21879	28.2252	61.7748	66.604	0.687705	2.34059	0.390098	0.386362	0.0665288	0.967051	5.47834
633	643.531	269.172	5	100	0	0	0	1.02716	1	0.490731	7.71645	40.4071	0.438022	0.332059	0.386819	0.40214	0.380211	0.410955	0.240817	59.5436	1632.73	0.118176	459.465	65974	-0.309157	0.887418	1.60646	1.63351	2.51627	3.42415	0.990557	0.137098	0.471271	0.881989	0.420144	-0.907457	0.700522	2.77785	6.35666	25.9777	64.0223	71.5384	0.661832	2.35021	0.391701	0.394479	0.0356043	0.962765	5.52347
611	630.179	274.155	5	100	0	0	0	0.56111	0	0.602265	19.8614	29.9717	0.303006	0.442403	0.308391	0.49913	0.493945	0.448429	0.362723	394.475	898.303	0.218455	7834.83	26923.7	-0.220212	1.29801	1.47671	1.82625	3.21903	2.4267	0.847811	0.530298	0.56651	0.824055	-0.992001	0.126232	0.776057	4.45661	5.47464	17.6382	72.3618	91.3894	0.55046	2.4953	0.415884	0.445416	0.0884105	1.03771	6.22654
795	644.01	286.495	5	100	0	0	0	0.584848	0	0.579604	24.9048	43.7042	0.476906	0.284251	0.479063	0.416805	0.357797	0.258515	0.335941	620.249	1910.06	0.194713	15447.2	83477.5	-0.236869	1.39628	1.64052	1.78533	3.10447	4.01069	-0.225972	0.974134	0.547693	0.83668	-0.274526	0.96158	0.761317	4.99047	6.61092	28.4835	61.5165	66.0481	0.690584	2.27334	0.37889	0.387301	0.0948377	0.952005	5.16806
1272	622.412	314.068	5	100	0	0	0	0.655557	0	0.561416	21.0146	19.154	0.0136063	0.49376	0.0130438	0.439968	0.434916	0.437308	0.315188	441.613	366.876	0.176952	9280.33	7027.14	-0.250715	1.32252	1.28226	1.75315	2.98505	1.04161	0.82857	-0.559886	0.532385	0.846502	0.299763	0.954014	0.749277	4.58417	4.37653	0.779608	89.2204	138.933	0.116646	1.8326	0.305434	0.436112	0.227323	0.904498	3.35843
243	610.384	268.099	5	100	0	0	0	0.547299	0	0.712467	29.9271	14.5661	0.227297	0.42483	0.20084	0.431616	0.458693	0.499223	0.507609	895.631	212.171	0.361655	26803.6	3090.51	-0.147235	1.47606	1.16334	2.03902	4.02208	1.94727	-0.996642	0.081878	0.653703	0.756751	0.90941	-0.415901	0.844078	5.47057	3.81656	13.138	76.862	103.11	0.476757	2.2425	0.37375	0.428223	0.126699	0.95833	5.0288
1110	617.25	292.284	5	100	0	0	0	0.903888	1	0.453223	2.72818	61.0328	0.480844	0.158854	0.418647	0.255075	0.436922	0.352539	0.205411	7.44297	3725	0.093097	20.3058	227347	-0.343688	0.435873	1.78556	1.57338	2.17562	3.38117	0.401737	-0.915755	0.437865	0.899041	-0.974062	-0.22628	0.673218	1.65172	7.81235	28.7405	61.2595	65.4973	0.693429	2.10288	0.35048	0.385593	0.122426	0.901088	4.42211
1280	555	224.734	5	100	0	0	0	0.843603	0	0.618624	2.22755	83.9298	0.326228	0.0708951	0.352337	0.200583	0.48592	0.471629	0.382696	4.96198	7044.21	0.236745	11.0531	591219	-0.208573	0.347827	1.92392	1.85637	2.63354	2.34147	0.791978	-0.610549	0.579915	0.814677	0.779083	-0.626921	0.786527	1.4925	9.16132	19.04	70.96	87.883	0.571164	1.90759	0.317932	0.339283	0.159933	0.856959	3.63891
1081	569.954	218.629	5	100	0	0	0	0.533868	0	0.715525	24.5536	26.6243	0.368447	0.405085	0.345652	0.465772	0.456643	0.456268	0.511976	602.879	708.853	0.366332	14802.9	18872.7	-0.145375	1.39012	1.42528	2.04526	4.01697	2.92809	-0.547305	0.836933	0.656014	0.754749	0.996862	0.0791547	0.845887	4.95516	5.15987	21.6199	68.3801	81.6088	0.606998	2.49787	0.416311	0.430677	0.0511455	1.02614	6.23934
124	550.809	261.98	5	100	0	0	0	0.754687	0	0.648712	24.2997	21.7725	0.106861	0.487659	0.111278	0.470748	0.475043	0.434348	0.420827	590.475	474.042	0.272996	14348.4	10321.1	-0.187948	1.3856	1.33791	1.91308	3.53845	1.37386	-0.73998	0.672628	0.604161	0.796863	0.216911	-0.976191	0.805427	4.92947	4.6661	6.1344	83.8656	122.757	0.326896	2.08594	0.347656	0.452548	0.185662	0.947386	4.35113
476	571.531	282.567	5	100	0	0	0	0.567332	0	0.669855	43.3086	30.6319	0.0575266	0.451391	0.0647796	0.424065	0.440886	0.373809	0.448706	1875.63	938.313	0.300568	81231.1	28742.3	-0.174019	1.63657	1.48617	1.95395	3.74082	1.18771	-0.62388	0.78152	0.620872	0.783912	-0.706136	0.708076	0.818447	6.58093	5.53461	3.29785	86.7021	131.201	0.239847	1.81246	0.302076	0.398937	0.188523	0.851589	3.285
126	599.212	233.863	5	100	0	0	0	0.506288	0	0.529562	51.62	23.853	0.367376	0.366629	0.319665	0.41117	0.422773	0.468087	0.280436	2664.62	568.966	0.148508	137548	13571.5	-0.276083	1.71282	1.37754	1.69819	2.85299	2.93837	0.976703	0.214597	0.505155	0.863028	-0.957942	0.286963	0.72771	7.18471	4.88395	21.5539	68.4461	81.7664	0.606116	2.3557	0.392617	0.389273	0.0521225	0.968747	5.54932
477	589.447	265.482	5	100	0	0	0	0.664169	0	0.378169	19.61	30.361	0.340927	0.409032	0.312039	0.454817	0.458295	0.474939	0.143012	384.552	921.79	0.0540826	7541.07	27986.5	-0.422314	1.29248	1.48232	1.45961	2.10019	2.70291	0.689243	0.72453	0.369219	0.929342	-0.869864	0.493292	0.614954	4.42832	5.51008	19.9334	70.0666	85.684	0.58389	2.45005	0.408341	0.431925	0.0676903	1.01162	6.00274
255	634.875	259.954	5	100	0	0	0	0.781519	0	0.593942	12.4024	23.692	0.159497	0.4568	0.145005	0.446233	0.465335	0.491421	0.352767	153.82	561.311	0.209523	1907.73	13298.6	-0.226256	1.09351	1.3746	1.81111	3.10681	1.59887	-0.163237	0.986587	0.559632	0.828741	-0.991555	0.129689	0.770676	3.5217	4.86744	9.1777	80.8223	114.009	0.399371	2.16429	0.360715	0.451516	0.162231	0.955137	4.68416
128	664.129	253.039	5	100	0	0	0	0.560158	0	0.624062	43.3654	23.8115	0.267194	0.456008	0.271865	0.498225	0.498026	0.455753	0.389453	1880.56	566.988	0.243043	81551.1	13500.8	-0.204772	1.63714	1.37679	1.86649	3.42266	2.19874	-0.578507	0.815677	0.584336	0.811512	-0.969022	0.246973	0.789976	6.58524	4.8797	15.4974	74.5026	96.877	0.516908	2.44707	0.407845	0.455881	0.108802	1.02821	5.98816
1328	655.179	234.848	5	100	0	0	0	0.864493	0	0.233635	8.33472	41.3131	0.207939	0.430626	0.184146	0.432238	0.459205	0.498692	0.0545853	69.4676	1706.77	0.012753	578.993	70512.1	-0.631462	0.920891	1.61609	1.26318	1.57543	1.83246	0.886654	-0.462434	0.231515	0.972831	-0.455021	-0.890481	0.483358	2.88699	6.42753	12.0016	77.9984	106.181	0.456003	2.21285	0.368808	0.431432	0.136283	0.953404	4.89669
1284	657	224.734	5	100	0	0	0	0.591657	0	0.618624	2.22755	62.068	0.421857	0.152951	0.469799	0.319277	0.450998	0.372403	0.382696	4.96198	3852.44	0.236745	11.0531	239113	-0.208573	0.347827	1.79287	1.85637	2.63354	2.88064	0.791978	-0.610549	0.579915	0.814677	-0.691709	0.722176	0.786527	1.4925	7.87832	24.9519	65.0481	73.8494	0.649505	2.18729	0.364548	0.39713	0.117235	0.930639	4.78422
1191	644.327	226.897	5	100	0	0	0	0.5962	0	0.461258	24.043	40.2822	0.192275	0.432291	0.169938	0.429499	0.457293	0.497901	0.212759	578.066	1622.66	0.0981368	13898.4	65364.1	-0.336056	1.38099	1.60511	1.58607	2.47231	1.76747	-0.886507	0.462715	0.445075	0.895493	0.529919	-0.848049	0.67916	4.90337	6.34683	11.0856	78.9144	108.69	0.438492	2.1792	0.363199	0.430895	0.143341	0.94563	4.7489
127	632.883	245.484	5	100	0	0	0	0.973585	1	0.562782	16.8912	9.86998	0.0351936	0.48947	0.0333735	0.44259	0.442	0.448783	0.316724	285.313	97.4165	0.178246	4819.27	961.499	-0.24966	1.22766	0.994316	1.75555	2.97211	1.1107	-0.925834	-0.37793	0.533541	0.845774	-0.43064	-0.902524	0.750188	4.10989	3.14165	2.01686	87.9831	135.107	0.1876	1.89141	0.315235	0.442295	0.218335	0.913559	3.57743
1295	649.39	235.411	5	100	0	0	0	0.825926	0	0.183352	10.0856	67.5446	0.435027	0.147168	0.445421	0.28812	0.469386	0.394157	0.033618	101.719	4562.27	0.00616392	1025.9	308157	-0.736714	1.0037	1.82959	1.20124	1.43355	3.46752	-0.613766	-0.789488	0.182326	0.983238	-1	0.000357948	0.428196	3.17578	8.21855	25.787	64.213	71.9653	0.659566	2.17928	0.363213	0.414592	0.123661	0.931667	4.74926
1209	669.436	227.543	5	100	0	0	0	0.57693	0	0.54707	18.7034	23.2874	0.313896	0.418958	0.286562	0.455536	0.46459	0.4841	0.299286	349.817	542.303	0.16373	6542.77	12628.8	-0.261957	1.27192	1.36712	1.72818	2.89518	2.49435	-0.145636	0.989338	0.520187	0.854052	-0.962549	-0.271109	0.739642	4.32474	4.8257	18.2942	71.7058	89.74	0.560264	2.42364	0.40394	0.437247	0.0835192	1.00692	5.87404
1352	659.625	231.878	5	100	0	0	0	0.645435	0	0.618621	2.22755	47.9969	0.0535788	0.495722	0.0520836	0.454703	0.453683	0.448644	0.382692	4.96198	2303.7	0.236741	11.0531	110571	-0.208575	0.347827	1.68121	1.85637	2.63353	1.16975	0.791978	-0.610549	0.579912	0.814679	-0.766267	-0.642523	0.786525	1.4925	6.92798	3.07131	86.9287	131.888	0.231471	1.95841	0.326402	0.451163	0.212583	0.930155	3.83539
295	567.92	419.296	5	100	0	0	0	0.644326	0	0.425636	8.76986	23.9033	0.0266591	0.49374	0.0277789	0.445815	0.442432	0.408539	0.181166	76.9104	571.368	0.0771108	674.494	13657.6	-0.370962	0.942993	1.37846	1.53056	2.25211	1.0829	0.609094	-0.793098	0.4129	0.910776	-0.942302	0.334764	0.652408	2.96139	4.8891	1.52763	88.4724	136.613	0.163276	1.84496	0.307494	0.425485	0.218791	0.898144	3.40389
531	550.875	426.734	5	100	0	0	0	0.951824	1	0.618621	2.22755	53.9715	0.495604	0.220591	0.456248	0.333246	0.398356	0.300462	0.382692	4.96198	2912.92	0.236741	11.0531	157215	-0.208575	0.347827	1.73216	1.85637	2.63353	3.34394	0.791978	-0.610549	0.579912	0.814679	-0.53493	-0.844896	0.786525	1.4925	7.34653	29.7096	60.2904	63.4416	0.703991	2.20451	0.367418	0.365801	0.102458	0.928689	4.85985
294	563.057	434.895	5	100	0	0	0	0.901657	1	0.586304	31.1458	37.5252	0.46272	0.329531	0.44528	0.435916	0.37277	0.346233	0.343752	970.061	1408.14	0.201543	30213.3	52840.8	-0.231877	1.4934	1.57432	1.79733	3.16117	3.8629	-0.266853	0.963737	0.553286	0.832991	-0.173036	0.984915	0.765705	5.58084	6.12578	27.5628	62.4372	68.0401	0.680235	2.39245	0.398742	0.404343	0.0563254	0.984801	5.72382
306	606.987	419.43	5	100	0	0	0	0.714506	0	0.585709	16.8176	22.8609	0.288796	0.418959	0.259455	0.44526	0.462324	0.492251	0.343055	282.832	522.621	0.20093	4756.55	11947.6	-0.232318	1.22576	1.35909	1.79626	3.10184	2.31941	-0.895537	-0.444987	0.55279	0.83332	-0.764169	-0.645017	0.765316	4.10093	4.78131	16.7859	73.2141	93.555	0.537397	2.36705	0.394508	0.43211	0.0966857	0.990231	5.6029
1138	595.952	387.177	5	100	0	0	0	0.545616	0	0.544506	33.4873	32.1756	0.167313	0.44129	0.187095	0.463158	0.481458	0.40139	0.296487	1121.4	1035.27	0.161439	37552.6	33310.4	-0.263997	1.52488	1.50753	1.72376	2.92001	1.64357	0.877306	-0.479932	0.517996	0.855383	0.688685	0.725061	0.737906	5.78682	5.67235	9.63163	80.3684	112.732	0.409039	2.1417	0.356951	0.42134	0.141904	0.930143	4.5869
745	716.011	450.317	5	100	0	0	0	0.645346	0	0.45131	27.3272	13.1139	0.0769894	0.493992	0.0748482	0.46071	0.462159	0.455937	0.203681	746.776	171.974	0.0919231	20407.3	2255.25	-0.345525	1.4366	1.11773	1.57037	2.43016	1.25732	0.811745	-0.584012	0.436145	0.899877	0.520579	0.853813	0.671796	5.22754	3.62131	4.41554	85.5845	127.84	0.27747	2.02464	0.337439	0.458323	0.203022	0.943017	4.09915
416	749.213	481.722	5	100	0	0	0	0.630541	0	0.715838	47.6718	14.2664	0.0468608	0.450676	0.0415375	0.409518	0.426991	0.464656	0.512424	2272.6	203.53	0.366813	108339	2903.64	-0.145185	1.67826	1.15431	2.0459	4.09799	1.15026	-0.520904	-0.853615	0.65625	0.754544	0.991661	-0.128874	0.846072	6.90448	3.77709	2.68591	87.3141	133.06	0.216474	1.84024	0.306707	0.418254	0.204229	0.879182	3.38648
535	661.05	459.322	5	100	0	0	0	0.526082	0	0.705556	62.6695	13.6331	0.103255	0.436819	0.0903387	0.41052	0.438222	0.483018	0.497809	3927.47	185.861	0.351232	246132	2533.87	-0.151469	1.79706	1.13459	2.02497	4.0366	1.35925	-0.161641	0.98685	0.648457	0.761251	0.875626	0.482991	0.839974	7.91641	3.6923	5.92664	84.0734	123.366	0.321333	1.96217	0.327029	0.42367	0.179899	0.896384	3.85012
602	681.202	540.196	5	100	0	0	0	0.627318	0	0.490301	75.4074	34.7251	0.331829	0.387209	0.368353	0.485711	0.475763	0.37781	0.240395	5686.28	1205.83	0.117866	428787	41872.7	-0.309537	1.87741	1.54064	1.63281	2.64923	2.66922	0.00917619	0.999958	0.470891	0.882191	-0.166798	-0.985991	0.700215	8.68374	5.8928	19.3798	70.6202	87.0432	0.576046	2.42668	0.404446	0.38251	0.0620848	1.00037	5.88875
493	732.042	511.027	5	100	0	0	0	0.62258	0	0.202493	6.68264	87.7582	0.353348	0.0813311	0.359822	0.206266	0.492481	0.466113	0.0410034	44.6577	7701.5	0.0083029	298.431	675870	-0.69359	0.824948	1.94329	1.22445	1.48153	2.72638	0.388916	0.921273	0.201112	0.979568	-0.204932	0.978776	0.449992	2.58508	9.36793	20.6922	69.3078	83.8381	0.594431	1.95936	0.32656	0.356585	0.157122	0.873662	3.8391
409	695.129	506.269	5	100	0	0	0	0.590861	0	0.650306	18.7696	33.1635	0.345145	0.414697	0.360128	0.497007	0.481559	0.417111	0.422898	352.298	1099.82	0.275013	6612.49	36473.8	-0.186882	1.27346	1.52066	1.91613	3.51507	2.73588	-0.0798708	0.996805	0.60543	0.795899	0.984416	-0.175858	0.806416	4.33239	5.75878	20.1906	69.8094	85.0559	0.58749	2.51565	0.419274	0.415904	0.0615481	1.03619	6.32848
1033	704.76	476.159	5	100	0	0	0	0.487095	0	0.628114	46.9637	17.664	0.031041	0.498125	0.0315968	0.450733	0.445952	0.421162	0.394527	2205.59	312.017	0.247808	103583	5511.47	-0.201962	1.67176	1.24709	1.87407	3.4544	1.09735	0.159506	-0.987197	0.58762	0.809137	-0.926708	0.375782	0.792536	6.85301	4.20286	1.7788	88.2212	135.839	0.176185	1.87861	0.313102	0.433557	0.219684	0.91077	3.52917
411	715.391	504.045	5	100	0	0	0	0.804847	0	0.649085	22.934	14.6414	0.0644011	0.494264	0.062466	0.456783	0.457043	0.452723	0.421311	525.968	214.371	0.273467	12062.6	3138.69	-0.187698	1.36048	1.16558	1.91379	3.53403	1.21145	-0.809237	-0.587483	0.604458	0.796637	0.875545	-0.483136	0.805658	4.78895	3.82641	3.69247	86.3075	130.009	0.253774	1.98768	0.33128	0.454753	0.208022	0.935331	3.95087
909	488.083	453.509	5	100	0	0	0	0.804357	0	0.178062	6.68264	60.8181	0.43793	0.11559	0.385292	0.21239	0.47725	0.412446	0.0317061	44.6577	3698.84	0.00564565	298.431	224956	-0.749429	0.824948	1.78403	1.1949	1.41465	3.40319	0.388916	0.921273	0.177123	0.984189	-0.903488	-0.428613	0.421974	2.58508	7.7986	25.9719	64.0281	71.5515	0.661763	2.0409	0.34015	0.398869	0.143089	0.892515	4.16526
1159	497.228	478.004	5	100	0	0	0	0.555939	0	0.610352	31.6985	9.35638	0.0425189	0.449094	0.0375611	0.406925	0.424546	0.463105	0.37253	1004.79	87.5418	0.227374	31850.5	819.075	-0.21442	1.50104	0.971108	1.84108	3.3123	1.1352	0.278828	0.960341	0.573156	0.819446	0.0683446	-0.997662	0.78125	5.63014	3.05882	2.43689	87.5631	133.82	0.206201	1.82375	0.303958	0.415735	0.205355	0.874756	3.32606
1126	512.758	464.903	5	100	0	0	0	0.601172	0	0.41383	12.9887	53.7938	0.354557	0.420108	0.347303	0.486908	0.473848	0.447391	0.171255	168.706	2893.77	0.0708706	2191.28	155667	-0.383178	1.11357	1.73073	1.5126	2.23023	2.79772	0.409886	0.912137	0.402119	0.915587	-0.377157	-0.926149	0.643296	3.60398	7.33443	20.7663	69.2337	83.659	0.595447	2.53011	0.421686	0.43375	0.0594595	1.04144	6.40148
1213	520.125	465.705	5	100	0	0	0	0.614849	0	0.618621	2.22755	74.8679	0.439827	0.275377	0.489568	0.43497	0.348515	0.23212	0.382692	4.96198	5605.2	0.236741	11.0531	419650	-0.208575	0.347827	1.8743	1.85637	2.63353	2.99376	0.791978	-0.610549	0.579912	0.814679	-0.505813	0.862643	0.786525	1.4925	8.65262	26.0928	63.9072	71.2814	0.663195	2.22038	0.370063	0.391742	0.101803	0.934611	4.93007
1160	527.667	462.602	5	100	0	0	0	0.677925	0	0.193386	6.68264	31.1064	0.236459	0.424115	0.264207	0.478296	0.491176	0.402002	0.0373981	44.6577	967.608	0.00723228	298.431	30098.8	-0.713575	0.824948	1.49285	1.21335	1.45629	1.97416	0.388916	0.921273	0.192183	0.981359	-0.304608	0.952478	0.439757	2.58508	5.57731	13.6776	76.3224	101.667	0.486271	2.29626	0.382709	0.413058	0.108093	0.9681	5.27279
595	533.833	446.744	5	100	0	0	0	0.579469	0	0.607162	31.2255	16.9283	0.226138	0.442908	0.205282	0.451735	0.470882	0.496545	0.368646	975.032	286.567	0.223828	30445.9	4851.1	-0.216695	1.49451	1.22861	1.83522	3.2909	1.94395	-0.189278	0.981924	0.570539	0.821271	-0.939215	-0.34333	0.779206	5.58798	4.1144	13.0698	76.9302	103.293	0.47554	2.29349	0.382248	0.447322	0.130472	0.980713	5.2601
610	502.563	449.914	5	100	0	0	0	0.574004	0	0.566267	25.4955	54.8912	0.346806	0.424189	0.343058	0.490696	0.478239	0.446346	0.320658	650.021	3013.04	0.181578	16572.6	165390	-0.246979	1.40646	1.7395	1.76168	3.02807	2.77346	0.354855	0.934921	0.536485	0.84391	-0.996246	-0.086563	0.752507	5.04931	7.40886	20.2921	69.7079	84.8089	0.588902	2.52933	0.421556	0.435268	0.0638189	1.04241	6.39753
1064	508.412	459.592	5	100	0	0	0	0.666533	0	0.232195	12.9887	65.7742	0.378858	0.0876923	0.357824	0.20248	0.495666	0.458775	0.0539145	168.706	4326.25	0.0125187	2191.28	284555	-0.634147	1.11357	1.81806	1.26137	1.57812	2.99881	0.409886	0.912137	0.230114	0.973164	0.19793	-0.980216	0.481866	3.60398	8.11013	22.263	67.737	80.0811	0.615514	1.9813	0.330216	0.368341	0.15631	0.881146	3.92553
281	535.715	418.249	5	100	0	0	0	0.67667	0	0.616142	19.7361	35.5	0.366958	0.402139	0.382116	0.493577	0.471097	0.405661	0.379631	389.514	1260.25	0.233907	7687.48	44738.9	-0.210319	1.29526	1.55023	1.85177	3.30348	2.91515	0.774892	0.632094	0.577891	0.816114	-0.809019	-0.587783	0.784947	4.44253	5.95819	21.5281	68.4719	81.828	0.605771	2.52155	0.420258	0.4039	0.0505912	1.03561	6.3582
1511	515.081	418.793	5	100	0	0	0	0.865164	0	0.201702	8.76986	37.0201	0.14757	0.464258	0.160205	0.470808	0.482948	0.41871	0.0406837	76.9104	1370.49	0.00820598	674.494	50735.6	-0.69529	0.942993	1.56844	1.22348	1.4834	1.54293	0.609094	-0.793098	0.200337	0.979727	-0.628024	0.778194	0.449112	2.96139	6.08441	8.48613	81.5139	115.969	0.384148	2.1445	0.357416	0.441484	0.159195	0.94509	4.59888
272	517.431	429.403	5	100	0	0	0	0.526373	0	0.56362	23.8358	25.3665	0.188441	0.462329	0.202041	0.483963	0.493342	0.430448	0.317668	568.145	643.459	0.179044	13542.2	16322.3	-0.249014	1.37723	1.40426	1.75702	3.00778	1.74505	-0.962735	0.270445	0.53425	0.845327	0.231636	0.972803	0.750746	4.88219	5.03652	10.8618	79.1382	109.307	0.434098	2.26056	0.376761	0.446388	0.142323	0.976202	5.11015
608	486.75	432.58	5	100	0	0	0	1.27698	1	0.45322	2.72818	53.9324	0.339795	0.426635	0.342413	0.495627	0.483405	0.440687	0.205408	7.44297	2908.7	0.0930952	20.3058	156873	-0.343691	0.435873	1.73185	1.57337	2.17561	2.46313	0.401737	-0.915755	0.437863	0.899042	-0.501494	-0.865161	0.673216	1.65172	7.34387	19.8644	70.1356	85.8528	0.582919	2.52856	0.421427	0.433661	0.0673082	1.0432	6.39363
582	490.125	429.332	5	100	0	0	0	1.08903	1	0.618621	2.22755	52.8938	0.345253	0.42425	0.3468	0.494529	0.481188	0.439926	0.382692	4.96198	2797.75	0.236741	11.0531	147984	-0.208575	0.347827	1.7234	1.85637	2.63353	2.43934	0.791978	-0.610549	0.579912	0.814679	0.491033	-0.871141	0.786525	1.4925	7.27281	20.1972	69.8028	85.0399	0.587582	2.53195	0.421991	0.432088	0.0642421	1.0436	6.41075
452	495.356	435.978	5	100	0	0	0	0.825842	0	0.478432	20.9555	44.3436	0.16994	0.456348	0.18564	0.474025	0.487182	0.417453	0.228897	439.133	1966.35	0.109512	9202.25	87195.3	-0.32018	1.3213	1.64683	1.61354	2.5485	1.655	0.860193	-0.509968	0.460388	0.887718	0.353493	0.935437	0.691688	4.57772	6.6591	9.78433	80.2157	112.304	0.412238	2.19059	0.365098	0.436901	0.147057	0.952842	4.79868
1395	689.76	73.681	5	100	0	0	0	0.729271	0	0.572018	11.1377	29.8283	0.378666	0.405003	0.378883	0.487964	0.464917	0.42302	0.327205	124.048	889.727	0.187167	1381.61	26539.1	-0.24259	1.0468	1.47463	1.77184	2.96878	2.96039	-0.989917	0.141648	0.54133	0.84081	-0.999858	-0.0168294	0.756319	3.33732	5.46153	22.2511	67.7489	80.1092	0.615358	2.53845	0.423076	0.414011	0.0451952	1.04123	6.44374
1182	685.59	146.318	5	100	0	0	0	0.651208	0	0.599362	34.22	37.9744	0.253194	0.442774	0.232982	0.461455	0.475395	0.492656	0.359235	1171.01	1442.06	0.215312	40071.9	54761.2	-0.222311	1.53428	1.57949	1.82096	3.24816	2.11498	0.331147	-0.943579	0.564116	0.825696	0.271824	0.962347	0.774185	5.84979	6.16234	14.6666	75.3334	99.0496	0.503184	2.35846	0.393076	0.452114	0.117503	0.998042	5.56231
55	676.658	91.553	5	100	0	0	0	0.574388	0	0.604156	36.5345	27.5777	0.330942	0.431795	0.331356	0.495337	0.485582	0.447536	0.365004	1334.77	760.53	0.22052	48765.1	20973.7	-0.218851	1.5627	1.44056	1.82971	3.28267	2.64415	-0.918635	0.395107	0.568068	0.822982	0.641639	-0.767006	0.777275	6.04438	5.25145	19.326	70.674	87.1761	0.575276	2.52255	0.420425	0.439665	0.0730233	1.04269	6.36325
52	640.466	93.962	5	100	0	0	0	0.560949	0	0.576475	22.0516	79.2831	0.270075	0.0470938	0.307638	0.166355	0.482673	0.484282	0.332323	486.273	6285.81	0.191576	10723.1	498358	-0.23922	1.34344	1.89918	1.77975	3.07584	2.22051	-0.0604146	-0.998173	0.545072	0.838389	-0.676709	-0.73625	0.75926	4.69591	8.90411	15.6687	74.3313	96.4318	0.519687	1.75812	0.293019	0.288857	0.173097	0.81546	3.09097
641	651.296	129.947	5	100	0	0	0	0.546792	0	0.685747	51.4504	18.8974	0.28494	0.434714	0.263001	0.463867	0.474252	0.488541	0.470249	2647.14	357.112	0.322472	136197	6748.48	-0.163836	1.71139	1.2764	1.98525	3.87077	2.3107	0.926468	0.376373	0.633251	0.773946	0.0478258	0.998856	0.828098	7.17289	4.34711	16.5553	73.4447	94.1453	0.533798	2.40932	0.401553	0.44929	0.100628	1.00901	5.8048
743	681.575	108.973	5	100	0	0	0	0.583788	0	0.381908	16.2931	12.4886	0.168187	0.466815	0.156187	0.460093	0.474013	0.48854	0.145854	265.465	155.965	0.0557027	4325.25	1947.79	-0.418041	1.212	1.09651	1.46508	2.10923	1.63695	-0.552313	-0.833637	0.372692	0.927955	-0.0776922	0.996977	0.617987	4.03647	3.53392	9.68242	80.3176	112.59	0.410106	2.21383	0.368972	0.463454	0.160498	0.972442	4.90107
706	448.69	290.047	5	100	0	0	0	0.600726	0	0.714684	37.7697	37.9758	0.273425	0.449455	0.283792	0.499227	0.498589	0.444315	0.510773	1426.55	1442.16	0.365041	53880.4	54767.2	-0.145886	1.57714	1.57951	2.04354	4.06667	2.24476	0.0705296	0.99751	0.655379	0.7553	0.273171	0.961965	0.84539	6.14571	6.16245	15.8682	74.1318	95.915	0.522901	2.4488	0.408134	0.446885	0.103057	1.02594	5.99664
1198	405.955	299.251	5	100	0	0	0	0.931723	1	0.26605	5.22406	73.8744	0.273408	0.0486311	0.31214	0.169558	0.481764	0.482865	0.0707826	27.2908	5457.43	0.0188317	142.569	403164	-0.575037	0.718008	1.86849	1.3048	1.65917	2.17428	-0.871928	0.489635	0.262922	0.964817	-0.998897	0.0469554	0.5158	2.28562	8.59502	15.8672	74.1328	95.9177	0.522884	1.76837	0.294728	0.292774	0.171678	0.817651	3.12712
1176	427.3	297.913	5	100	0	0	0	0.886276	0	0.181365	6.10039	75.4853	0.259594	0.0428182	0.290695	0.155443	0.485158	0.488299	0.0328933	37.2148	5698.03	0.00596569	227.025	430118	-0.741447	0.785358	1.87786	1.19885	1.42227	2.10547	-0.181779	0.983339	0.180372	0.983598	0.0869663	0.996211	0.42587	2.4699	8.68823	15.046	74.954	98.0545	0.509504	1.72201	0.287001	0.275145	0.177474	0.807281	2.96531
1174	417.375	298.129	5	100	0	0	0	1.36289	1	0.554141	3.15023	75.2948	0.260594	0.0432867	0.292558	0.156623	0.484802	0.487784	0.307072	9.92395	5669.31	0.170161	31.2627	426869	-0.25638	0.498342	1.87676	1.74045	2.56637	2.05392	-0.00863724	-0.999963	0.526213	0.850353	-0.103239	0.994657	0.744406	1.77489	8.67726	15.1053	74.8947	97.8993	0.510484	1.72565	0.287608	0.276576	0.176952	0.808004	2.97786
289	506.429	348.935	5	100	0	0	0	0.503805	0	0.602133	40.2192	31.323	0.16439	0.425035	0.187968	0.450898	0.475525	0.386408	0.362564	1617.58	981.13	0.218312	65057.9	30731.9	-0.220308	1.60443	1.49586	1.82601	3.2756	1.63005	0.582259	-0.813003	0.566402	0.824129	-0.0927929	0.995685	0.775972	6.34186	5.5967	9.4618	80.5382	113.209	0.40545	2.09022	0.348371	0.405721	0.136808	0.906507	4.36904
981	556.974	204.77	5	100	0	0	0	0.550435	0	0.35138	12.9887	14.7271	0.131627	0.437578	0.115709	0.418513	0.446521	0.489516	0.123468	168.706	216.887	0.0433842	2191.28	3194.12	-0.454223	1.11357	1.16812	1.42103	1.98228	1.47328	0.409886	0.912137	0.344194	0.938899	0.830978	-0.556305	0.592773	3.60398	3.83759	7.56362	82.4364	118.608	0.362804	2.03946	0.339911	0.428046	0.169182	0.914521	4.15941
1062	545.125	207.63	5	100	0	0	0	1.22723	1	0.138566	5.45635	85.6178	0.313104	0.0647701	0.34133	0.192181	0.484663	0.475694	0.0192005	29.7718	7330.41	0.00266054	162.445	627613	-0.858343	0.736902	1.93256	1.14863	1.31032	2.42365	-0.735792	0.677208	0.138123	0.990415	-0.713722	-0.700429	0.372245	2.33588	9.25299	18.2464	71.7536	89.8597	0.559557	1.87174	0.311957	0.327217	0.163064	0.846671	3.50342
850	520.227	203.267	5	100	0	0	0	0.703659	0	0.194537	23.2028	28.2945	0.00983549	0.460052	0.0109549	0.410293	0.418718	0.361684	0.0378446	538.37	800.579	0.00736218	12491.7	22652	-0.710998	1.36554	1.4517	1.21475	1.47085	1.02992	-0.936198	-0.351474	0.193312	0.981137	-0.0201648	-0.999797	0.441063	4.81693	5.31926	0.563541	89.4365	139.607	0.099174	1.67154	0.27859	0.385989	0.210082	0.828459	2.79404
1004	546.136	203.359	5	100	0	0	0	1.02318	1	0.749075	5.22406	48.1217	0.433125	0.315321	0.470366	0.457731	0.389399	0.291334	0.561113	27.2908	2315.7	0.420316	142.569	111435	-0.125475	0.718008	1.68234	2.11504	3.70718	3.28709	-0.871928	0.489635	0.680962	0.732319	-0.840286	-0.542144	0.865491	2.28562	6.93698	25.666	64.334	72.2367	0.658122	2.35728	0.392879	0.411262	0.075058	0.976879	5.55675
1046	545.344	206.06	5	100	0	0	0	1.29214	1	0.200783	4.45509	24.0554	0.283041	0.451226	0.27511	0.489195	0.490447	0.473976	0.0403138	19.8478	578.662	0.00809433	88.4239	13920	-0.697273	0.648856	1.38121	1.22236	1.46851	2.20265	-0.967081	-0.254469	0.199437	0.979911	-0.880702	0.473672	0.448088	2.11071	4.90463	16.4418	73.5582	94.4365	0.532016	2.463	0.410499	0.462601	0.102809	1.03146	6.06634
911	566.263	459.054	5	100	0	0	0	0.4576	0	0.496973	26.9155	21.6807	0.171637	0.479364	0.177365	0.486797	0.492574	0.449901	0.246982	724.444	470.053	0.122743	19498.8	10191.1	-0.303667	1.43	1.33607	1.64374	2.65362	1.66139	0.97762	-0.210379	0.476767	0.87903	0.305486	-0.952197	0.704963	5.18802	4.65625	9.88301	80.117	112.028	0.414291	2.25764	0.376273	0.464633	0.156991	0.986265	5.09693
1389	600.077	487.775	5	100	0	0	0	0.631116	0	0.529738	15.5928	26.9889	0.292806	0.441756	0.304096	0.499857	0.496336	0.43988	0.280622	243.135	728.401	0.148656	3791.16	19658.7	-0.275939	1.19292	1.43119	1.69849	2.78616	2.34701	0.114909	-0.993376	0.505307	0.862939	0.95956	-0.281505	0.727831	3.94877	5.19508	17.026	72.974	92.9423	0.541116	2.47473	0.412455	0.440818	0.0920254	1.03105	6.12429
393	617.239	514.596	5	100	0	0	0	0.51869	0	0.653179	48.3686	27.6916	0.296489	0.444997	0.30198	0.499262	0.495205	0.44983	0.426643	2339.52	766.825	0.278674	113159	21234.6	-0.184968	1.68456	1.44235	1.92164	3.62898	2.39825	-0.947303	-0.320338	0.607714	0.794156	0.550309	-0.834961	0.808195	6.95475	5.26228	17.2468	72.7532	92.3807	0.544508	2.48776	0.414627	0.447414	0.0921558	1.03632	6.18896
1318	566.761	487.162	5	100	0	0	0	0.525227	0	0.543503	24.146	23.0411	0.10231	0.494133	0.101608	0.470724	0.473162	0.455509	0.295396	583.029	530.892	0.160548	14077.8	12232.3	-0.264798	1.38285	1.3625	1.72203	2.89527	1.35566	-0.834233	0.551411	0.517137	0.855902	-0.867399	-0.497613	0.737227	4.91386	4.80011	5.87221	84.1278	123.525	0.319859	2.09745	0.349574	0.463116	0.192196	0.958077	4.39928
313	583.137	559.147	5	100	0	0	0	0.556647	0	0.558841	69.3049	4.38942	0.0211511	0.461319	0.0189807	0.412627	0.422296	0.453408	0.312303	4803.17	19.267	0.174528	332883	84.571	-0.252712	1.84076	0.642407	1.74864	3.03054	1.06517	0.188723	0.98203	0.530204	0.84787	-0.948297	-0.317383	0.747557	8.32496	2.09509	1.21196	88.788	137.59	0.145434	1.78978	0.298297	0.417462	0.216292	0.87624	3.20332
378	540.152	528.879	5	100	0	0	0	0.479561	0	0.633346	62.7481	12.83	0.0671118	0.494998	0.0653392	0.458496	0.458866	0.452667	0.401127	3937.32	164.609	0.254052	247060	2111.93	-0.198359	1.7976	1.10823	1.8839	3.50445	1.22149	-0.0836552	0.996495	0.591845	0.806052	0.260586	0.965451	0.79583	7.92137	3.5819	3.84812	86.1519	129.541	0.259059	1.99748	0.332913	0.455581	0.20712	0.937806	3.98992
389	582.219	493.631	5	100	0	0	0	0.585177	0	0.592331	27.7774	36.675	0.415396	0.359407	0.436587	0.477458	0.430954	0.354552	0.350856	771.584	1345.06	0.207823	21432.6	49329.9	-0.227436	1.44369	1.56437	1.8082	3.1897	3.36785	0.476733	-0.879048	0.558296	0.829642	-0.854253	0.519858	0.76963	5.27043	6.05599	24.5443	65.4557	74.7778	0.644512	2.47435	0.412392	0.423175	0.0475929	1.01574	6.12243
556	607.482	456.773	5	100	0	0	0	0.448	0	0.72026	58.0444	29.8424	0.419085	0.3445	0.368735	0.407293	0.396557	0.431541	0.518774	3369.15	890.569	0.373652	195560	26576.7	-0.142511	1.76376	1.47483	2.05497	4.14899	3.42492	0.997184	0.0749936	0.65958	0.751634	-0.999996	-0.00273021	0.848681	7.61869	5.46282	24.7768	65.2232	74.2474	0.647368	2.36771	0.394619	0.401925	0.0325825	0.969356	5.60606
1379	633.724	485.482	5	100	0	0	0	0.603873	0	0.343004	8.48224	9.64108	0.0636717	0.478492	0.059037	0.440414	0.447703	0.464673	0.117652	71.9484	92.9504	0.040355	610.284	896.142	-0.464701	0.928511	0.984126	1.40917	1.93353	1.20726	0.809052	-0.587737	0.336318	0.941749	-0.214619	-0.976698	0.585665	2.91243	3.10501	3.65059	86.3494	130.136	0.252333	1.95399	0.325665	0.444059	0.205169	0.920227	3.81808
1405	625.081	489.649	5	100	0	0	0	0.546654	0	0.479482	17.1101	22.4897	0.323977	0.430011	0.307277	0.477424	0.476347	0.472177	0.229903	292.756	505.787	0.110234	5009.08	11375	-0.319228	1.23325	1.35198	1.61524	2.54167	2.56145	-0.985811	-0.167861	0.46132	0.887234	-0.478154	-0.878276	0.692446	4.13644	4.74233	18.9036	71.0964	88.2211	0.56919	2.48721	0.414536	0.451094	0.0787945	1.03057	6.18623
1203	618.15	726.162	5	100	0	0	0	3.50625	1	0.282613	3.52206	27.2822	0.291976	0.41127	0.259774	0.437239	0.456906	0.492444	0.0798701	12.4049	744.318	0.0225723	43.6908	20306.6	-0.548808	0.546797	1.43588	1.32659	1.68749	2.22767	-0.371354	-0.928491	0.278866	0.96033	0.837195	-0.546905	0.531614	1.87672	5.22324	16.9763	73.0237	93.069	0.540348	2.34961	0.391601	0.424254	0.094029	0.981997	5.52066
899	602.645	714.236	5	100	0	0	0	0.709515	0	0.654093	22.5522	18.9859	0.161676	0.485117	0.162936	0.484805	0.489662	0.460831	0.427838	508.602	360.464	0.279846	11470.1	6843.74	-0.18436	1.35319	1.27843	1.9234	3.56553	1.6121	-0.532077	-0.846696	0.60844	0.7936	0.135922	0.99072	0.80876	4.74892	4.35728	9.30419	80.6958	113.653	0.40209	2.24503	0.374171	0.472818	0.164421	0.98752	5.04015
925	629.446	712.762	5	100	0	0	0	0.701475	0	0.540251	23.2563	23.9878	0.364789	0.380603	0.323519	0.427858	0.434326	0.468591	0.291871	540.855	575.415	0.157684	12578.3	13802.9	-0.267404	1.36654	1.37999	1.71644	2.87477	2.89091	-0.953653	-0.300908	0.514351	0.85758	-0.910686	0.4131	0.735018	4.82248	4.89773	21.3946	68.6054	82.1474	0.603978	2.39969	0.399948	0.404231	0.0531497	0.98685	5.75849
658	607.246	693.079	5	100	0	0	0	0.641325	0	0.629237	16.4447	20.2775	0.283622	0.44785	0.271128	0.482699	0.486304	0.479775	0.395939	270.428	411.177	0.24914	4447.11	8337.64	-0.201186	1.21603	1.30701	1.87618	3.36052	2.2821	-0.671875	-0.740665	0.588528	0.808477	0.989814	0.142367	0.793245	4.05521	4.50305	16.4765	73.5235	94.3474	0.532562	2.45138	0.408563	0.463813	0.102619	1.02674	6.00925
274	634.708	686.576	5	100	0	0	0	0.578183	0	0.70823	34.002	52.2911	0.435012	0.226517	0.499409	0.402132	0.381817	0.238061	0.50159	1156.14	2734.36	0.355241	39310.9	142983	-0.149826	1.5315	1.71843	2.03039	4.00506	3.58964	0.527384	-0.849627	0.65049	0.759514	0.89834	-0.439302	0.841564	5.83112	7.23126	25.7861	64.2139	71.9674	0.659554	2.18295	0.363825	0.391975	0.109464	0.924187	4.76526
810	618.404	702.951	5	100	0	0	0	0.865884	0	0.380969	15.0256	9.32524	0.0959103	0.471542	0.0881853	0.442863	0.455282	0.475996	0.145137	225.769	86.9601	0.0552928	3392.31	810.924	-0.41911	1.17683	0.96966	1.4637	2.10244	1.32712	0.630629	-0.776085	0.37182	0.928305	0.0993737	-0.99505	0.617227	3.87629	3.05373	5.50372	84.4963	124.61	0.309694	2.02978	0.338296	0.449072	0.191124	0.932367	4.12
814	659.228	716.574	5	100	0	0	0	0.529514	0	0.659271	41.375	27.1337	0.300578	0.440436	0.309975	0.499827	0.494859	0.441769	0.434638	1711.89	736.238	0.286544	70829.5	19976.9	-0.180936	1.61674	1.43351	1.93338	3.66146	2.42418	-0.509235	-0.860628	0.612541	0.790439	0.908898	-0.417018	0.811955	6.43234	5.209	17.4923	72.5077	91.7583	0.54825	2.48744	0.414574	0.441103	0.0883835	1.03455	6.18738
1195	642.278	653.983	5	100	0	0	0	0.649522	0	0.519116	34.7239	34.9527	0.440432	0.352112	0.410879	0.438302	0.400201	0.396628	0.269481	1205.75	1221.69	0.139892	41868.3	42701.4	-0.284736	1.54063	1.54348	1.68054	2.78136	3.62811	-0.165614	-0.986191	0.496113	0.868258	-0.384975	-0.922927	0.720497	5.8927	5.91208	26.1314	63.8686	71.1953	0.663651	2.43855	0.406426	0.40554	0.0324872	0.998182	5.94655
1414	662.354	662.644	5	100	0	0	0	0.624929	0	0.587616	8.48224	26.9959	0.33378	0.429778	0.336353	0.496293	0.485483	0.443268	0.345293	71.9484	728.779	0.202899	610.284	19674	-0.230906	0.928511	1.4313	1.79969	3.00144	2.59115	0.809052	-0.587737	0.554378	0.832265	0.957566	-0.288215	0.766561	2.91243	5.19576	19.4984	70.5016	86.7512	0.577737	2.52496	0.420826	0.436523	0.0709539	1.04295	6.3754
283	665.097	678.497	5	100	0	0	0	0.757884	0	0.390228	17.7506	34.2052	0.268877	0.399901	0.305424	0.475256	0.485784	0.384082	0.152278	315.084	1170	0.0594231	5592.93	40019.9	-0.408682	1.24921	1.53409	1.47732	2.14613	2.20007	-0.890733	0.454526	0.380399	0.924822	0.345075	-0.938575	0.624682	4.21315	5.84852	15.5975	74.4025	96.6169	0.518534	2.31932	0.386554	0.391991	0.0875544	0.966888	5.37926
280	657.298	685.391	5	100	0	0	0	0.548924	0	0.504318	21.3659	28.027	0.290692	0.438037	0.305854	0.499002	0.496225	0.432499	0.254337	456.502	785.513	0.128267	9753.57	22015.6	-0.297296	1.32972	1.44758	1.65586	2.67882	2.34352	0.585299	-0.810818	0.48321	0.875504	0.24482	-0.969569	0.710154	4.62233	5.29405	16.8994	73.1006	93.2651	0.539159	2.46231	0.410385	0.435268	0.0913546	1.02578	6.06297
284	561.073	742.533	5	100	0	0	0	0.629019	0	0.448561	28.1324	29.5622	0.0704266	0.465314	0.0775997	0.44073	0.452606	0.391676	0.201207	791.432	873.924	0.0902536	22264.9	25835.1	-0.348178	1.44921	1.47074	1.56606	2.41825	1.23399	0.141458	-0.989944	0.433669	0.901072	-0.960242	-0.279171	0.669747	5.304	5.43711	4.03849	85.9615	128.969	0.26538	1.89835	0.316392	0.416203	0.18941	0.883178	3.60374
286	575.547	758.464	5	100	0	0	0	0.535162	0	0.438276	27.5532	23.119	0.12026	0.477235	0.128303	0.469116	0.477427	0.424203	0.192086	759.179	534.488	0.0841866	20917.8	12356.8	-0.358252	1.44017	1.36397	1.55003	2.36985	1.42955	0.660237	-0.751058	0.424379	0.905485	-0.903493	-0.428602	0.662024	5.24911	4.80822	6.90711	83.0929	120.505	0.346785	2.09654	0.349424	0.446659	0.175527	0.941611	4.3955
722	572.782	787.804	5	100	0	0	0	0.582946	0	0.727661	24.2485	17.8099	0.196939	0.477102	0.192772	0.485452	0.491639	0.476278	0.529491	587.99	317.193	0.38529	14257.9	5649.17	-0.138071	1.38468	1.25066	2.07023	4.10794	1.7855	-0.773434	0.633877	0.665125	0.746732	-0.86223	0.506517	0.85303	4.92428	4.22018	11.358	78.642	107.941	0.443778	2.32018	0.386697	0.47669	0.148713	1.00389	5.38324
275	540.208	755.912	5	100	0	0	0	0.563549	0	0.575881	27.463	36.6037	0.366779	0.391214	0.39132	0.491518	0.468248	0.388233	0.331639	754.216	1339.83	0.190985	20713	49042.8	-0.239667	1.43875	1.56352	1.7787	3.0898	2.93059	0.725206	-0.688532	0.544574	0.838713	-0.889117	0.45768	0.758868	5.24052	6.0501	21.5171	68.4829	81.8543	0.605623	2.49731	0.416219	0.391267	0.0506946	1.02581	6.23657
634	550.659	779.802	5	100	0	0	0	0.573168	0	0.541956	20.8367	53.6211	0.445539	0.230874	0.499051	0.400735	0.389739	0.251393	0.293716	434.168	2875.22	0.159181	9046.63	154173	-0.266036	1.31883	1.72934	1.71937	2.8761	3.66224	0.914572	-0.404423	0.515813	0.856701	-0.212395	-0.977184	0.736177	4.56472	7.32264	26.4578	63.5422	70.4695	0.667487	2.21733	0.369555	0.395237	0.10688	0.936239	4.91656
553	536.625	768.972	5	100	0	0	0	0.652629	0	0.582043	10.4481	27.5706	0.258207	0.450326	0.271711	0.497312	0.499346	0.438855	0.338774	109.163	760.138	0.197181	1140.54	20957.5	-0.235045	1.01904	1.44045	1.78969	3.01216	2.11508	-0.853842	-0.520532	0.549732	0.835341	0.647069	-0.762431	0.762917	3.23235	5.25077	14.9637	75.0363	98.2698	0.508141	2.41576	0.402626	0.44459	0.109456	1.01614	5.83588
517	558.637	769.883	5	100	0	0	0	0.668724	0	0.366223	15.1898	16.3621	0.265322	0.402608	0.23056	0.418332	0.448493	0.497726	0.134119	230.73	267.718	0.0491176	3504.74	4380.43	-0.436254	1.18155	1.21384	1.44228	2.0446	2.15983	0.495285	-0.86873	0.358091	0.933687	-0.608474	-0.793574	0.605164	3.89741	4.04501	15.3861	74.6139	97.1666	0.515094	2.26304	0.377173	0.41047	0.105798	0.953691	5.12135
1055	564.878	815.086	5	100	0	0	0	0.796137	0	0.564361	32.8894	11.7939	0.186459	0.42103	0.162202	0.415995	0.449176	0.497974	0.318503	1081.71	139.096	0.179751	35576.9	1640.49	-0.248443	1.51706	1.07166	1.75832	3.03339	1.72912	0.995268	0.0971693	0.534876	0.844931	-0.697907	0.716189	0.75124	5.73493	3.43422	10.7462	79.2538	109.627	0.431809	2.13284	0.355473	0.418513	0.143504	0.927972	4.54899
934	553.233	797.792	5	100	0	0	0	0.665129	0	0.53455	17.8899	14.313	0.191864	0.455615	0.175794	0.455047	0.472502	0.493837	0.285744	320.049	204.862	0.152744	5725.64	2932.19	-0.272012	1.25261	1.15573	1.70668	2.8238	1.75423	-0.818994	0.573802	0.509454	0.860498	0.984581	-0.174928	0.731129	4.22965	3.78325	11.0616	78.9384	108.756	0.438023	2.24466	0.37411	0.455331	0.148157	0.974424	5.03849
297	596.464	777.289	5	100	0	0	0	0.709373	0	0.549992	31.5417	14.8829	0.191615	0.421318	0.16698	0.417717	0.450199	0.498152	0.302491	994.879	221.501	0.166368	31380.2	3296.57	-0.259644	1.49889	1.17269	1.73324	2.94802	1.75796	0.125442	0.992101	0.52268	0.852529	0.734591	-0.67851	0.741614	5.6162	3.85784	11.047	78.953	108.796	0.437739	2.14598	0.357664	0.419517	0.141344	0.931359	4.60523
950	588.629	797.416	5	100	0	0	0	0.568709	0	0.682176	14.6917	33.1618	0.371054	0.405315	0.379973	0.492707	0.470038	0.414419	0.465364	215.846	1099.7	0.31746	3171.15	36468.2	-0.166104	1.16707	1.52064	1.97818	3.68331	2.92712	0.850146	-0.526546	0.630484	0.776203	0.984713	-0.174184	0.825939	3.83298	5.75863	21.7806	68.2194	81.2256	0.609142	2.53351	0.422251	0.409867	0.0489987	1.04009	6.41865
1168	530.75	645.333	5	100	0	0	0	0.765973	0	0.573334	14.176	31.0144	0.270642	0.434089	0.29206	0.493711	0.496157	0.42062	0.328712	200.959	961.893	0.188462	2848.79	29832.5	-0.241592	1.15155	1.49156	1.77417	3.01047	2.20329	0.999246	-0.0388233	0.542436	0.840097	-0.390824	0.920465	0.757188	3.7651	5.56906	15.7025	74.2975	96.3443	0.520233	2.40728	0.401213	0.427354	0.0979703	1.00689	5.79499
514	533.307	698.057	5	100	0	0	0	0.466612	0	0.53132	39.3462	28.881	0.152871	0.441395	0.171679	0.457484	0.477407	0.397531	0.282301	1548.12	834.112	0.149992	60912.8	24090	-0.274644	1.5949	1.46061	1.70118	2.85332	1.57529	0.997091	-0.0762178	0.506672	0.862139	-0.570132	-0.821553	0.728917	6.27265	5.3741	8.79334	81.2067	115.096	0.390987	2.09837	0.349728	0.419463	0.147686	0.918103	4.40314
251	538.64	667.15	5	100	0	0	0	0.497381	0	0.395466	37.5723	33.2127	0.320288	0.401492	0.351766	0.490232	0.483505	0.392432	0.156393	1411.68	1103.08	0.0618483	53040	36636.4	-0.402891	1.57487	1.5213	1.48508	2.18736	2.56952	-0.126472	0.99197	0.385238	0.922817	0.974576	-0.224059	0.628861	6.12962	5.76305	18.6803	71.3197	88.7761	0.56594	2.43972	0.406619	0.396962	0.0686907	1.00778	5.95221
247	499.211	689.678	5	100	0	0	0	0.591554	0	0.57274	30.0098	32.5413	0.266861	0.43275	0.289477	0.492203	0.495943	0.418027	0.328031	900.588	1058.94	0.187877	27026.5	34459.2	-0.242042	1.47726	1.51243	1.77312	3.07722	2.19708	-0.986473	0.163927	0.541937	0.840419	0.902429	0.43084	0.756796	5.47812	5.7045	15.4776	74.5224	96.9285	0.516586	2.39526	0.39921	0.425389	0.0990369	1.00262	5.73728
1223	501.929	656.549	5	100	0	0	0	0.574898	0	0.432387	39.6602	27.3005	0.0531824	0.466532	0.0585898	0.434429	0.444813	0.38608	0.186959	1572.93	745.317	0.0808384	62382.8	20347.5	-0.364127	1.59835	1.43617	1.54093	2.35243	1.17237	0.924798	-0.380458	0.419039	0.907968	0.827047	-0.562133	0.657561	6.29763	5.22499	3.04857	86.9514	131.957	0.230613	1.84363	0.307271	0.410254	0.196502	0.871526	3.39896
1503	509.25	674.201	5	100	0	0	0	1.17798	1	0.45322	2.72818	79.0587	0.404542	0.136946	0.462132	0.30705	0.452192	0.38489	0.205408	7.44297	6250.28	0.0930952	20.3058	494139	-0.343691	0.435873	1.89795	1.57337	2.17561	2.86399	0.401737	-0.915755	0.437863	0.899042	-0.495911	-0.868373	0.673216	1.65172	8.8915	23.8624	66.1376	76.3438	0.636036	2.14775	0.357959	0.394716	0.121709	0.918081	4.61284
1316	6.274	826.173	5	100	0	0	0	0.589029	0	0.605213	14.5218	35.8469	0.183185	0.436638	0.205284	0.466404	0.484741	0.401537	0.366283	210.883	1285	0.221679	3062.4	46063.3	-0.218092	1.16202	1.55445	1.83164	3.19631	1.71598	0.926936	-0.375219	0.568937	0.822381	-0.960663	-0.277716	0.777954	3.81075	5.98723	10.5553	79.4447	110.156	0.428001	2.17779	0.362965	0.419088	0.133887	0.938131	4.74276
1430	24.706	835.969	5	100	0	0	0	1.08434	1	0.20884	6.49435	80.7981	0.224667	0.0292038	0.224609	0.118676	0.486868	0.497163	0.0436141	42.1766	6528.33	0.00910838	273.909	527477	-0.680186	0.812536	1.9074	1.23225	1.4988	1.915	0.209599	0.977787	0.207325	0.978272	-0.772843	0.634597	0.45699	2.5484	8.98878	12.9833	77.0167	103.525	0.473991	1.58119	0.263531	0.224638	0.19151	0.774644	2.50015
240	16.329	851.24	5	100	0	0	0	0.631795	0	0.642625	27.2363	31.0761	0.0233098	0.445701	0.0265305	0.403979	0.419955	0.35495	0.412967	741.816	965.724	0.265383	20204.3	30010.9	-0.192042	1.43515	1.49243	1.90147	3.51003	1.07231	0.861407	-0.507915	0.599299	0.800525	-0.333324	0.942812	0.801639	5.21884	5.57459	1.33567	88.6643	137.207	0.152675	1.67443	0.279071	0.379464	0.19908	0.81575	2.8037
237	1.688	839.341	5	100	0	0	0	0.933622	1	0.390537	6.30045	37.3845	0.211666	0.427821	0.23764	0.471585	0.488236	0.400183	0.152519	39.6957	1397.6	0.0595644	250.101	52248.6	-0.408338	0.799372	1.57269	1.47777	2.08649	1.84229	0.0172638	0.999851	0.380685	0.924705	-0.309447	0.950917	0.62493	2.51007	6.11429	12.22	77.78	105.588	0.460072	2.23713	0.372855	0.414002	0.119242	0.95143	5.00476
1428	3.55	833.896	5	100	0	0	0	0.809891	0	0.530481	6.10039	81.4574	0.15658	0.0129445	0.151048	0.0780188	0.470146	0.493976	0.28141	37.2148	6635.31	0.149283	227.025	540495	-0.27533	0.785358	1.91093	1.69975	2.65404	1.57953	-0.181779	0.983339	0.505948	0.862564	-0.22214	0.975015	0.728341	2.4699	9.02538	9.00844	80.9916	114.487	0.395702	1.36271	0.227119	0.153814	0.204518	0.720164	1.85699
1429	16.308	838.151	5	100	0	0	0	0.677781	0	0.384903	14.607	87.7224	0.0769105	0.00332014	0.0767904	0.0376272	0.439589	0.475172	0.14815	213.364	7695.22	0.0570235	3116.61	675043	-0.414649	1.16456	1.94311	1.46947	2.11709	1.25775	0.891644	-0.452737	0.375469	0.926835	-0.239833	0.970814	0.620406	3.82191	9.36602	4.411	85.589	127.854	0.277327	1.10941	0.184902	0.0768505	0.213136	0.657469	1.23079
432	354.512	914.892	5	100	0	0	0	0.531132	0	0.564239	35.6057	11.9307	0.124417	0.436769	0.10913	0.415832	0.444095	0.487981	0.318366	1267.77	142.342	0.179634	45139.7	1698.23	-0.248537	1.55152	1.07667	1.75811	3.03701	1.44502	-0.866517	-0.499148	0.534773	0.844996	-0.593717	0.804674	0.751158	5.96705	3.45408	7.14709	82.8529	119.81	0.352728	2.01822	0.336371	0.4263	0.171783	0.909075	4.07323
436	375.635	931.629	5	100	0	0	0	0.771144	0	0.400215	18.4363	26.6506	0.348933	0.422911	0.340538	0.486515	0.475408	0.451734	0.160172	339.897	710.254	0.0641033	6266.45	18928.7	-0.397707	1.26567	1.42571	1.49215	2.18895	2.75749	-0.401593	0.915818	0.389616	0.920977	0.998599	0.0529128	0.632625	4.29375	5.16242	20.4221	69.5779	84.4929	0.590706	2.52604	0.421007	0.437323	0.0630372	1.04084	6.38087
1504	370.875	921.667	5	100	0	0	0	1.62997	1	0.618611	2.22755	49.1786	0.2571	0.435668	0.233762	0.453983	0.470976	0.494977	0.38268	4.96198	2418.53	0.23673	11.0531	118940	-0.208582	0.347827	1.69178	1.85635	2.6335	1.99026	0.791978	-0.610549	0.579904	0.814685	-0.885181	0.465247	0.786518	1.4925	7.01275	14.8981	75.1019	98.4418	0.50705	2.34647	0.391078	0.444825	0.114737	0.991702	5.5059
1452	225.666	918.339	5	100	0	0	0	0.923436	1	0.597015	14.0882	41.9479	0.0932123	0.471318	0.101322	0.454636	0.465023	0.406762	0.356427	198.477	1759.63	0.212792	2796.19	73812.6	-0.224015	1.14886	1.62271	1.81669	3.14397	1.31941	0.998801	0.0489474	0.562176	0.827017	-0.894448	-0.447172	0.772667	3.75343	6.47672	5.34844	84.6516	125.068	0.305307	1.99227	0.332046	0.430699	0.183284	0.910764	3.96915
1106	248.99	898.087	5	100	0	0	0	0.709055	0	0.515382	41.9409	32.7251	0.276359	0.445806	0.289093	0.498945	0.498215	0.439226	0.265619	1759.04	1070.93	0.136895	73775.7	35046.4	-0.287871	1.62264	1.51488	1.67428	2.76835	2.26324	-0.891296	-0.453422	0.492867	0.870105	0.965971	0.258649	0.717901	6.47618	5.72059	16.043	73.957	95.4631	0.525699	2.44764	0.407941	0.442516	0.100282	1.0241	5.99096
1453	255.75	911.925	5	100	0	0	0	1.53319	1	0.618624	2.22755	47.8038	0.441967	0.304811	0.477708	0.450278	0.372593	0.276222	0.382696	4.96198	2285.2	0.236745	11.0531	109241	-0.208573	0.347827	1.67946	1.85637	2.63354	2.99791	0.791978	-0.610549	0.579915	0.814677	-0.628723	-0.777629	0.786527	1.4925	6.91403	26.2295	63.7705	70.977	0.664806	2.32358	0.387263	0.40728	0.083051	0.966604	5.39902
1485	230.25	922.317	5	100	0	0	0	0.777226	0	0.231844	4.98094	85.9143	0.189385	0.0169519	0.168064	0.0904879	0.478541	0.49829	0.0537516	24.8098	7381.27	0.012462	123.576	634156	-0.634804	0.697311	1.93407	1.26092	1.55747	1.72665	-0.964156	0.265335	0.229773	0.973244	-0.887227	-0.461334	0.481502	2.2318	9.269	10.9169	79.0831	109.155	0.435184	1.44172	0.240287	0.178725	0.201721	0.74154	2.07856
657	486	936.606	5	100	0	0	0	1.25943	1	0.618624	2.22755	84.6985	0.442592	0.159435	0.457616	0.305323	0.461732	0.380034	0.382696	4.96198	7173.84	0.236745	11.0531	607613	-0.208573	0.347827	1.92788	1.85637	2.63354	3.01283	0.791978	-0.610549	0.579915	0.814677	0.12418	-0.99226	0.786527	1.4925	9.20318	26.2694	63.7306	70.8882	0.665276	2.20673	0.367789	0.411313	0.118282	0.938916	4.86967
447	488.379	914.679	5	100	0	0	0	0.638916	0	0.785711	48.4971	7.09968	0.0884459	0.453921	0.0790472	0.423379	0.442827	0.477427	0.617342	2351.97	50.4055	0.485052	114064	357.863	-0.104737	1.68572	0.851239	2.19397	4.69439	1.29901	-0.980543	-0.196303	0.707328	0.706886	0.72875	0.68478	0.886403	6.96399	2.66452	5.07421	84.9258	125.88	0.297399	1.96505	0.327508	0.433103	0.189647	0.907413	3.86141
826	396.492	960.202	5	100	0	0	0	0.520241	0	0.544662	26.6841	16.2337	0.246773	0.415304	0.216615	0.426901	0.455092	0.498999	0.296657	712.041	263.533	0.161578	19000.2	4278.12	-0.263873	1.42625	1.21042	1.72403	2.9082	2.05989	0.999811	0.0194363	0.518129	0.855302	-0.50185	-0.864954	0.738012	5.16567	4.02911	14.2866	75.7134	100.051	0.496763	2.25968	0.376614	0.421102	0.116294	0.958462	5.10617
769	135.898	796.304	5	100	0	0	0	0.573667	0	0.665011	34.002	8.2646	0.0251231	0.465294	0.0227002	0.417297	0.425929	0.454502	0.44224	1156.14	68.3036	0.294094	39310.9	564.502	-0.177171	1.5315	0.917222	1.94451	3.68588	1.07798	0.527384	-0.849627	0.617068	0.78691	0.916874	-0.399176	0.815482	5.83112	2.87482	1.4396	88.5604	136.885	0.158503	1.81085	0.301808	0.421613	0.215983	0.883045	3.27916
279	161.484	840.91	5	100	0	0	0	0.647503	0	0.537741	57.0313	23.0753	0.0920483	0.478607	0.0983755	0.459215	0.466428	0.415239	0.289165	3252.57	532.469	0.155496	185498	12286.9	-0.269427	1.75611	1.36315	1.71213	2.9021	1.31601	0.464112	0.885776	0.512197	0.858868	-0.883907	-0.467663	0.733308	7.55191	4.80368	5.28146	84.7185	125.266	0.303395	2.00991	0.334985	0.437227	0.186966	0.920908	4.03975
204	246.722	771.302	5	100	0	0	0	0.492773	0	0.623033	24.3506	49.4633	0.451049	0.297427	0.482205	0.443153	0.357103	0.265947	0.38817	592.952	2446.62	0.241843	14438.7	121018	-0.205489	1.38651	1.69428	1.86457	3.37023	3.73127	-0.7048	0.709406	0.583501	0.812112	-0.718875	0.695139	0.789324	4.93463	7.03302	26.811	63.189	69.6884	0.671602	2.29688	0.382814	0.400128	0.0892023	0.958679	5.27568
430	233.719	766.866	5	100	0	0	0	0.489244	0	0.560878	10.9127	34.8798	0.292567	0.405757	0.325618	0.485733	0.487758	0.393109	0.314584	119.087	1216.6	0.176443	1299.56	42434.8	-0.251132	1.03793	1.54257	1.75221	2.90641	2.33464	-0.996568	-0.0827795	0.53193	0.846788	-0.316731	-0.948515	0.748918	3.30344	5.90591	17.0117	72.9883	92.9788	0.540895	2.39054	0.398424	0.399433	0.0802395	0.99229	5.71469
1378	261.653	832.6	5	100	0	0	0	0.64946	0	0.50882	12.4024	10.0231	0.114313	0.472438	0.105688	0.449257	0.461881	0.479809	0.258898	153.82	100.463	0.131732	1907.73	1006.95	-0.293436	1.09351	1.001	1.66333	2.6579	1.39935	-0.163237	0.986587	0.487147	0.87332	-0.563257	-0.826282	0.713316	3.5217	3.16593	6.564	83.436	121.502	0.338102	2.08339	0.347231	0.455569	0.184066	0.94489	4.3405
307	252.261	864.998	5	100	0	0	0	0.535917	0	0.599703	44.1033	24.5244	0.272613	0.454086	0.277804	0.498819	0.498166	0.454529	0.359644	1945.1	601.446	0.215679	85785.4	14750.1	-0.222064	1.64447	1.3896	1.82158	3.26518	2.23431	0.120708	0.992688	0.564397	0.825503	-0.571507	0.820597	0.774405	6.64103	4.95221	15.8198	74.1802	96.0402	0.522124	2.45602	0.409336	0.454307	0.10577	1.03018	6.03202
533	561.767	699.314	5	100	0	0	0	0.467613	0	0.602367	33.8193	25.4725	0.244491	0.465114	0.246211	0.49604	0.498477	0.463953	0.362846	1143.75	648.848	0.218566	38680.7	16527.8	-0.220139	1.52916	1.40607	1.82644	3.26628	2.05718	0.672972	-0.739668	0.566594	0.823997	0.33326	0.942835	0.776123	5.81544	5.04703	14.1518	75.8482	100.408	0.49446	2.41429	0.402381	0.464534	0.122516	1.02299	5.82878
598	587.839	697.858	5	100	0	0	0	0.454605	0	0.730983	27.8666	22.5338	0.200959	0.474727	0.205848	0.492117	0.496987	0.45648	0.534336	776.547	507.772	0.390591	21639.7	11442	-0.136093	1.44508	1.35283	2.07712	4.15618	1.80996	0.39653	-0.918022	0.667602	0.744519	-0.516408	-0.856342	0.854975	5.27888	4.74698	11.593	78.407	107.297	0.448285	2.32712	0.387853	0.465604	0.143592	1.00283	5.41548
1028	592.875	711.223	5	100	0	0	0	0.32191	0	0.618601	2.22755	63.9378	0.480625	0.216396	0.476469	0.353061	0.421658	0.314876	0.382667	4.96198	4088.04	0.236718	11.0531	261380	-0.208589	0.347827	1.80576	1.85633	2.63346	3.25013	0.791978	-0.610549	0.579896	0.814691	0.893889	0.448288	0.786512	1.4925	7.99611	28.7262	61.2738	65.5279	0.693271	2.26308	0.377181	0.387359	0.102813	0.952074	5.12155
1339	580.875	737.204	5	100	0	0	0	2.23475	1	0.618601	2.22755	77.05	0.073751	0.49184	0.0766626	0.461812	0.463386	0.426841	0.382667	4.96198	5936.7	0.236718	11.0531	457423	-0.208589	0.347827	1.88677	1.85633	2.63346	1.23858	0.791978	-0.610549	0.579896	0.814691	0.996723	-0.0808915	0.786512	1.4925	8.77781	4.22946	85.7705	128.397	0.271571	1.99429	0.332382	0.444327	0.200273	0.9292	3.9772
1362	573	740.452	5	100	0	0	0	0.567345	0	0.453206	2.72818	13.8327	0.215336	0.428222	0.190444	0.431767	0.459053	0.499212	0.205396	7.44297	191.344	0.0930866	20.3058	2646.8	-0.343704	0.435873	1.14091	1.57335	2.17557	1.80441	0.401737	-0.915755	0.43785	0.899048	0.954007	0.299785	0.673206	1.65172	3.71923	12.4352	77.5648	105.004	0.464043	2.22403	0.370672	0.429995	0.132657	0.955185	4.94633
1149	562.125	720.317	5	100	0	0	0	2.70686	1	0.618601	2.22755	82.1073	0.449168	0.279131	0.489273	0.433649	0.357157	0.23692	0.382667	4.96198	6741.61	0.236718	11.0531	553535	-0.208589	0.347827	1.91438	1.85633	2.63346	3.05355	0.791978	-0.610549	0.579896	0.814691	0.413132	0.910671	0.786512	1.4925	9.06131	26.6903	63.3097	69.9548	0.6702	2.2453	0.374216	0.395403	0.100569	0.943821	5.04136
1027	577.879	722.339	5	100	0	0	0	0.571862	0	0.599315	25.7376	25.4299	0.284463	0.449157	0.290758	0.499448	0.497185	0.450766	0.359178	662.424	646.68	0.215261	17049.2	16445	-0.222345	1.41057	1.40534	1.82087	3.22636	2.30441	0.568646	0.822582	0.564077	0.825722	0.292805	0.956172	0.774154	5.07322	5.04281	16.5268	73.4732	94.2184	0.533351	2.47178	0.411963	0.449962	0.0987445	1.03297	6.10968
1276	959.625	730.709	5	100	0	0	0	0.512246	0	0.618611	2.22755	87.3409	0.473565	0.309052	0.463205	0.427345	0.346449	0.307488	0.38268	4.96198	7628.43	0.23673	11.0531	666274	-0.208582	0.347827	1.94122	1.85635	2.6335	3.21042	0.791978	-0.610549	0.579904	0.814685	-0.584038	0.811726	0.786518	1.4925	9.34564	28.266	61.734	66.5161	0.688161	2.3271	0.387851	0.386897	0.0761137	0.965161	5.41541
1274	940.535	743.779	5	100	0	0	0	0.562727	0	0.690353	26.3566	36.7164	0.469355	0.319257	0.438833	0.418476	0.357293	0.348097	0.476587	694.67	1348.09	0.329013	18309.1	49497.2	-0.160929	1.42089	1.56486	1.99442	3.83997	3.9207	0.940418	0.340019	0.636809	0.771021	-0.832005	0.554768	0.830875	5.13387	6.05941	27.9924	62.0076	67.1068	0.685095	2.35131	0.391885	0.387885	0.0588245	0.968889	5.52866
384	908.868	757.193	5	100	0	0	0	0.518138	0	0.507019	50.2551	35.5291	0.215838	0.417203	0.245149	0.46637	0.485559	0.391641	0.257068	2525.58	1262.32	0.130338	126923	44849	-0.294976	1.70118	1.55058	1.66033	2.72893	1.89813	-0.0103823	0.999946	0.485573	0.874196	-0.825778	-0.563995	0.712053	7.08908	5.96063	12.4647	77.5353	104.924	0.464584	2.22176	0.370293	0.404422	0.113746	0.942016	4.93622
1087	881.221	725.782	5	100	0	0	0	0.527703	0	0.492601	29.9687	12.2027	0.160121	0.453749	0.144989	0.443234	0.463651	0.491578	0.242656	898.123	148.906	0.119532	26915.6	1817.05	-0.307505	1.47667	1.08646	1.63657	2.63602	1.60264	-0.992375	0.123256	0.472919	0.881106	-0.355707	0.934597	0.701855	5.47437	3.49324	9.21392	80.7861	113.907	0.400151	2.15732	0.359554	0.448492	0.161216	0.951644	4.65404
398	968.178	740.76	5	100	0	0	0	0.722067	0	0.48413	30.0098	22.9968	0.118936	0.478	0.126576	0.469007	0.477	0.425314	0.234382	900.588	528.853	0.113471	27026.5	12161.9	-0.315038	1.47726	1.36167	1.62276	2.59319	1.42415	-0.986473	0.163927	0.465439	0.88508	-0.844511	-0.535538	0.695795	5.47812	4.7955	6.8307	83.1693	120.727	0.344871	2.09483	0.349139	0.447161	0.176438	0.941828	4.38833
696	990.561	725.357	5	100	0	0	0	0.627427	0	0.30807	35.044	29.3089	0.0519118	0.439126	0.0593967	0.411498	0.432907	0.36129	0.0949071	1228.08	859.012	0.029238	43036.9	25176.7	-0.511351	1.54461	1.467	1.3608	1.84185	1.16793	-0.467518	-0.883984	0.30322	0.952921	-0.859641	-0.510899	0.555041	5.9198	5.41377	2.97566	87.0243	132.178	0.227842	1.75613	0.292688	0.386394	0.185648	0.828447	3.08399
516	528.313	767.515	5	100	0	0	0	0.759694	0	0.426331	7.71645	33.2198	0.312226	0.425808	0.330645	0.498277	0.491494	0.421808	0.181758	59.5436	1103.56	0.0774891	459.465	36659.9	-0.370253	0.887418	1.5214	1.53163	2.24346	2.44047	0.990557	0.137098	0.413533	0.910489	0.97296	-0.230973	0.65294	2.77785	5.76366	18.1934	71.8066	89.9924	0.558772	2.48026	0.413376	0.423808	0.0782458	1.02757	6.15168
674	528.489	795.726	5	100	0	0	0	0.787906	0	0.694832	38.2267	13.6967	0.0774785	0.492356	0.0747994	0.458997	0.461061	0.458318	0.482792	1461.28	187.6	0.335459	55859.9	2569.5	-0.15812	1.58237	1.13662	2.00337	3.91516	1.25943	0.503451	0.864024	0.640256	0.768161	0.904553	0.426362	0.833566	6.18277	3.70091	4.44364	85.5564	127.756	0.27835	2.02301	0.337168	0.458657	0.202597	0.941978	4.09257
270	505.523	779.455	5	100	0	0	0	0.783511	0	0.597839	37.4068	17.9916	0.26275	0.448064	0.246075	0.472295	0.481719	0.48838	0.357411	1399.27	323.698	0.213675	52342.2	5823.84	-0.223416	1.57295	1.25507	1.81819	3.2442	2.16314	-0.288167	0.95758	0.562858	0.826554	-0.756507	0.653985	0.7732	6.11611	4.24165	15.2333	74.7667	97.5649	0.512591	2.39928	0.399881	0.46018	0.113628	1.01192	5.75656
1492	521.25	756.04	5	100	0	0	0	0.444052	0	0.35836	3.15023	88.6189	0.114067	0.00614094	0.102796	0.0544665	0.453636	0.485944	0.128422	9.92395	7853.31	0.0460213	31.2627	695952	-0.44568	0.498342	1.94753	1.43098	1.90316	1.39074	-0.00863724	-0.999963	0.350739	0.936473	0.608608	0.793471	0.598632	1.77489	9.41376	6.54981	83.4502	121.544	0.337738	1.21705	0.202842	0.108432	0.210543	0.684478	1.48121
271	517.943	751.526	5	100	0	0	0	0.61314	0	0.504723	17.3977	28.3305	0.148001	0.446711	0.165186	0.459176	0.477567	0.400985	0.254745	302.68	802.617	0.128576	5265.94	22738.5	-0.296947	1.24049	1.45225	1.65653	2.66709	1.54959	-0.992935	0.11866	0.483565	0.875308	-0.0561366	-0.998423	0.710439	4.17106	5.32264	8.5111	81.4889	115.898	0.384709	2.09763	0.349604	0.423848	0.151726	0.92111	4.40003
749	463.75	780.433	5	100	0	0	0	1.52802	1	0.24576	4.72534	35.3951	0.226094	0.465193	0.216147	0.480271	0.488429	0.484827	0.060398	22.3288	1252.81	0.0148434	105.511	44343.4	-0.609489	0.674433	1.54894	1.27859	1.59555	1.90292	-0.999916	0.0129507	0.243294	0.969953	-0.743026	-0.669262	0.495742	2.17378	5.94938	13.0672	76.9328	103.3	0.475493	2.36096	0.393493	0.472732	0.133791	1.00922	5.57414
1054	504.6	800.208	5	100	0	0	0	1.21339	1	0.282625	3.52206	47.9547	0.110738	0.491258	0.113238	0.473697	0.476916	0.444368	0.0798769	12.4049	2299.65	0.0225752	43.6908	110279	-0.548789	0.546797	1.68083	1.32661	1.68752	1.37901	-0.371354	-0.928491	0.278877	0.960327	-0.738478	-0.674278	0.531625	1.87672	6.92493	6.35786	83.6421	122.103	0.332773	2.11021	0.351702	0.459032	0.186308	0.956933	4.45301
1029	478.71	807.766	5	100	0	0	0	0.573516	0	0.572297	29.3411	19.8564	0.28881	0.441742	0.272166	0.475715	0.481227	0.482967	0.327524	860.9	394.277	0.187441	25259.8	7828.91	-0.242379	1.46748	1.2979	1.77233	3.07313	2.32985	-0.875643	-0.482958	0.541564	0.840659	0.845149	0.534531	0.756503	5.41674	4.45605	16.7867	73.2133	93.5529	0.53741	2.44263	0.407105	0.458728	0.0993563	1.02165	5.96643
931	466.125	789.166	5	100	0	0	0	0.957362	1	0.618611	2.22755	34.9372	0.242505	0.461562	0.232372	0.482567	0.489511	0.483778	0.38268	4.96198	1220.61	0.23673	11.0531	42644.6	-0.208582	0.347827	1.54329	1.85635	2.6335	1.91939	0.791978	-0.610549	0.579904	0.814685	-0.370624	-0.928783	0.786518	1.4925	5.91077	14.0344	75.9656	100.719	0.492448	2.39229	0.398716	0.472064	0.125325	1.01606	5.72308
236	422.848	779.519	5	100	0	0	0	0.604464	0	0.518206	56.8357	15.2625	0.201699	0.438927	0.181366	0.440233	0.463544	0.495928	0.268537	3230.3	232.944	0.139158	183596	3555.31	-0.285498	1.75462	1.18363	1.67901	2.79281	1.81325	0.283107	0.959088	0.495322	0.868709	0.430876	-0.902411	0.719865	7.53895	3.90672	11.6363	78.3637	107.178	0.449109	2.2217	0.370283	0.43958	0.140142	0.959612	4.93594
1103	447.75	801.507	5	100	0	0	0	0.964763	1	0.667097	3.52206	20.6025	0.173462	0.481383	0.177082	0.48749	0.492722	0.456203	0.445018	12.4049	424.463	0.29687	43.6908	8745	-0.175811	0.546797	1.31392	1.94857	3.07017	1.6356	-0.371354	-0.928491	0.618708	0.785621	0.983457	-0.181142	0.81676	1.87672	4.539	9.98917	80.0108	111.731	0.416488	2.26834	0.378057	0.468793	0.15758	0.990818	5.14538
999	433.814	813.811	5	100	0	0	0	0.545107	0	0.631615	40.771	42.4746	0.496386	0.252515	0.445261	0.352101	0.343585	0.270192	0.398938	1662.27	1804.09	0.251975	67772.6	76628.1	-0.199548	1.61035	1.62813	1.88065	3.46932	4.28214	0.0696481	-0.997572	0.590449	0.807075	-0.99801	0.0630573	0.794742	6.38522	6.51725	29.7612	60.2388	63.333	0.704547	2.16004	0.360007	0.347843	0.0957298	0.907441	4.66577
336	479.883	836.629	5	100	0	0	0	0.531062	0	0.691157	47.5155	22.6266	0.312996	0.423701	0.292872	0.465284	0.469757	0.472268	0.477698	2257.72	511.963	0.330164	107277	11584	-0.160423	1.67684	1.35462	1.99602	3.90593	2.50979	-0.381677	-0.924296	0.637429	0.770509	-0.593541	-0.804804	0.831359	6.89315	4.75674	18.2399	71.7601	89.876	0.55946	2.43688	0.406146	0.444492	0.0821363	1.01166	5.93837
990	457.784	804.912	5	100	0	0	0	0.64483	0	0.471028	20.6575	7.82737	0.0410336	0.473929	0.0376673	0.429626	0.436584	0.458535	0.221867	426.732	61.2677	0.104506	8815.22	479.565	-0.326953	1.31508	0.893616	1.60164	2.51194	1.13	0.972012	-0.234931	0.453803	0.891102	0.999646	0.0266085	0.686315	4.54505	2.79774	2.35171	87.6483	134.08	0.202568	1.87737	0.312896	0.433105	0.212474	0.901748	3.52454
730	359.059	874.574	5	100	0	0	0	0.57045	0	0.577835	25.544	30.5157	0.16527	0.429314	0.187927	0.454228	0.477217	0.390261	0.333893	652.496	931.208	0.192935	16667.4	28416.5	-0.238196	1.40729	1.48452	1.78218	3.09598	1.63229	0.399763	0.916618	0.546212	0.837647	-0.783468	0.621433	0.760155	5.05411	5.5241	9.51292	80.4871	113.065	0.406534	2.10422	0.350703	0.409787	0.138094	0.912855	4.42773
331	350.587	849.653	5	100	0	0	0	0.439257	0	0.578015	36.7376	33.1488	0.290468	0.405581	0.323753	0.485045	0.487741	0.392607	0.334101	1349.65	1098.84	0.193116	49582.9	36425.3	-0.238061	1.56511	1.52047	1.7825	3.12091	2.35636	-0.820058	0.572281	0.546362	0.837549	0.986894	-0.161368	0.760273	6.06116	5.7575	16.886	73.114	93.2994	0.538951	2.38519	0.397533	0.399094	0.080983	0.990446	5.68916
1099	347.521	818.366	5	100	0	0	0	0.484488	0	0.603049	38.1621	26.155	0.268017	0.449493	0.279652	0.498432	0.498598	0.441788	0.363668	1456.35	684.084	0.21931	55577.2	17892.2	-0.219647	1.58163	1.41755	1.82768	3.27833	2.20428	0.446624	0.894722	0.567156	0.82361	0.853288	0.52144	0.776562	6.17755	5.1142	15.5463	74.4537	96.7498	0.517704	2.43598	0.405997	0.44564	0.10516	1.02191	5.934
1076	369.322	807.001	5	100	0	0	0	0.530375	0	0.629837	18.3012	25.9134	0.365669	0.394062	0.332524	0.446656	0.445811	0.464937	0.396695	334.934	671.504	0.249853	6129.69	17401	-0.200772	1.26248	1.41352	1.8773	3.37962	2.8888	-0.521285	0.853383	0.589013	0.808124	0.703748	0.71045	0.793623	4.27799	5.09052	21.4488	68.5512	82.0178	0.604706	2.44966	0.408276	0.419937	0.0526272	1.00697	6.00083
334	393.283	840.276	5	100	0	0	0	0.685678	0	0.371219	40.5571	22.0685	0.323549	0.403313	0.29001	0.439999	0.451899	0.481852	0.137804	1644.88	487.019	0.0511553	66711.5	10747.8	-0.43037	1.60807	1.34377	1.4495	2.08695	2.58354	0.279818	-0.960053	0.362752	0.931886	-0.0772743	-0.99701	0.609277	6.36845	4.69771	18.8777	71.1223	88.2854	0.568814	2.39062	0.398437	0.421656	0.0760685	0.990679	5.71507
333	377.297	852.833	5	100	0	0	0	0.524547	0	0.473451	26.8232	14	0.152685	0.476562	0.144136	0.466169	0.476631	0.48289	0.224156	719.484	196	0.106127	19298.9	2744	-0.324725	1.42851	1.14613	1.60553	2.53572	1.56922	0.992849	-0.119377	0.45596	0.89	0.990607	0.136737	0.688078	5.17911	3.74166	8.78256	81.2174	115.127	0.390749	2.19907	0.366512	0.471365	0.169048	0.974101	4.83592
842	549.5	866.025	5	100	0	0	0	0.728305	0	0.291333	4.72534	77.5975	0.326546	0.0735097	0.369888	0.213616	0.477575	0.463427	0.0848749	22.3288	6021.37	0.0247269	105.511	467243	-0.53561	0.674433	1.88985	1.33821	1.73122	2.4911	-0.999916	0.0129507	0.287229	0.957862	0.808922	-0.587916	0.539753	2.17378	8.80894	19.0593	70.9407	87.8352	0.571442	1.92456	0.32076	0.348217	0.154922	0.858678	3.70394
587	546.481	854.401	5	100	0	0	0	0.610248	0	0.557911	9.83658	28.2962	0.292066	0.435426	0.308849	0.498492	0.495731	0.429002	0.311265	96.7583	800.675	0.173658	951.771	22656.1	-0.253435	0.992844	1.45173	1.74702	2.87465	2.32214	-0.400261	-0.916401	0.529415	0.848363	-0.0218644	-0.999761	0.746934	3.13633	5.31942	16.9817	73.0183	93.0553	0.540431	2.45957	0.409928	0.432214	0.0898088	1.024	6.04946
691	508.125	873.133	5	100	0	0	0	0.7528	0	0.348908	16.9645	73.0365	0.38444	0.0987696	0.3781	0.220892	0.490309	0.447495	0.121737	287.794	5334.33	0.0424749	4882.29	389601	-0.457289	1.22954	1.86354	1.41752	1.9813	3.07095	-0.951026	-0.309112	0.341872	0.939747	-0.703186	-0.711006	0.590684	4.1188	8.54614	22.609	67.391	79.265	0.620032	2.02001	0.336668	0.38127	0.148248	0.888795	4.08042
338	530.703	845.551	5	100	0	0	0	0.58874	0	0.444823	12.5021	12.1764	0.0140976	0.497212	0.013711	0.443327	0.43692	0.433024	0.197868	156.303	148.265	0.088016	1954.11	1805.33	-0.351813	1.09698	1.08552	1.56021	2.36099	1.0431	-0.0642264	0.997935	0.430298	0.902687	-0.380161	0.92492	0.666951	3.53583	3.48947	0.80776	89.1922	138.845	0.118733	1.83829	0.306382	0.434972	0.227743	0.906948	3.37932
337	513.825	859.357	5	100	0	0	0	0.496213	0	0.48293	41.3451	36.6459	0.357862	0.401395	0.378531	0.494278	0.47448	0.400597	0.233221	1709.42	1342.92	0.11263	70676	49212.6	-0.316116	1.61642	1.56403	1.62082	2.59791	2.86958	-0.483278	-0.875467	0.464376	0.885638	-0.869017	0.494782	0.694932	6.43002	6.05359	20.969	69.031	83.1699	0.598216	2.50714	0.417857	0.400996	0.0543345	1.03072	6.28577
1121	510.75	881.181	5	100	0	0	0	0.632578	0	0.210035	7.21807	37.3815	0.370414	0.391109	0.393536	0.49152	0.467031	0.389129	0.0441147	52.1005	1397.38	0.00926563	376.065	52236	-0.677708	0.858421	1.57266	1.23372	1.5041	2.84946	0.804531	0.593911	0.208494	0.978024	-0.312299	0.949984	0.458296	2.68665	6.11404	21.7412	68.2588	81.3196	0.608616	2.50274	0.417123	0.392323	0.0494453	1.0277	6.2637
692	543.116	874.659	5	100	0	0	0	0.73145	0	0.466156	26.2623	12.5735	0.135073	0.477869	0.127161	0.461778	0.471807	0.479987	0.217301	689.708	158.093	0.101296	18113.3	1987.78	-0.331469	1.41933	1.09946	1.59386	2.4994	1.49016	0.904224	0.427059	0.449456	0.893303	0.00712933	0.999975	0.682756	5.12468	3.54591	7.76284	82.2372	118.036	0.367523	2.15367	0.358946	0.466792	0.176606	0.963847	4.63832
1258	539.25	890.361	5	100	0	0	0	1.294	1	0.630725	3.52206	78.8166	0.310849	0.0651645	0.352051	0.199341	0.478317	0.471056	0.397814	12.4049	6212.06	0.250911	43.6908	489613	-0.20016	0.546797	1.89662	1.87897	2.91497	2.34861	-0.371354	-0.928491	0.58973	0.8076	-0.273263	-0.961939	0.794182	1.87672	8.87787	18.1104	71.8896	90.2006	0.557538	1.87678	0.312796	0.33145	0.160113	0.845713	3.5223
951	536.625	871.005	5	100	0	0	0	1.13194	1	0.618601	2.22755	77.9233	0.326118	0.0735307	0.371573	0.214856	0.476406	0.462494	0.382667	4.96198	6072.04	0.236718	11.0531	473153	-0.208589	0.347827	1.89167	1.85633	2.63346	2.34037	0.791978	-0.610549	0.579896	0.814691	0.578196	-0.815898	0.786512	1.4925	8.82742	19.0333	70.9667	87.8995	0.571067	1.92498	0.32083	0.348846	0.154443	0.858401	3.70554
1100	854.759	895.19	5	100	0	0	0	0.6727	0	0.709313	38.7748	22.2216	0.347194	0.3794	0.30369	0.418919	0.433929	0.477117	0.503125	1503.49	493.8	0.356873	58297.3	10973	-0.149162	1.58855	1.34678	2.03259	4.02748	2.76377	0.879917	0.475127	0.651313	0.75881	-0.228417	-0.973563	0.842207	6.22694	4.71398	20.3158	69.6842	84.7513	0.589232	2.36025	0.393375	0.39916	0.0627395	0.973727	5.57078
577	865.083	933.431	5	100	0	0	0	1.01702	1	0.16378	4.72534	74.055	0.288548	0.0459512	0.272808	0.148563	0.496583	0.493024	0.0268239	22.3288	5484.14	0.00439322	105.511	406128	-0.785739	0.674433	1.86955	1.17796	1.37244	2.2543	-0.999916	0.0129507	0.163049	0.986618	-0.974217	0.225613	0.404697	2.17378	8.60552	16.771	73.229	93.5929	0.537167	1.74548	0.290913	0.280678	0.180971	0.819472	3.04669
473	860.459	954.88	5	100	0	0	0	0.54647	0	0.570482	64.6952	34.26	0.291114	0.42308	0.315206	0.493222	0.492449	0.413102	0.32545	4185.47	1173.75	0.185663	270780	40212.6	-0.243758	1.81087	1.53479	1.76912	3.09873	2.36822	0.957511	-0.288395	0.540038	0.841641	0.293149	-0.956067	0.755303	8.04333	5.8532	16.9247	73.0753	93.2007	0.53955	2.42817	0.404695	0.418091	0.085855	1.00972	5.89602
1249	778.997	823.483	5	100	0	0	0	0.481687	0	0.657979	27.9111	32.1031	0.279284	0.431513	0.301011	0.494665	0.495627	0.419721	0.432936	779.03	1030.61	0.284863	21743.6	33085.7	-0.181788	1.44578	1.50655	1.93089	3.61702	2.27611	0.355299	-0.934753	0.611519	0.79123	0.634355	0.773042	0.811159	5.2831	5.66596	16.2175	73.7825	95.0133	0.528473	2.42182	0.403637	0.425617	0.0935733	1.0106	5.86522
523	751.398	788.325	5	100	0	0	0	0.536408	0	0.583885	47.983	16.7417	0.0759771	0.496783	0.0757171	0.464357	0.464445	0.446667	0.340922	2302.37	280.285	0.199059	110475	4692.44	-0.233673	1.68109	1.2238	1.79299	3.17	1.25426	-0.757262	-0.653112	0.551269	0.834327	-0.859217	-0.511612	0.764124	6.92698	4.09166	4.35737	85.6426	128.014	0.275639	2.02395	0.337324	0.455512	0.203185	0.942946	4.09636
346	739.9	839.785	5	100	0	0	0	0.942563	1	0.248823	8.62725	14.7523	0.151114	0.484488	0.146505	0.475833	0.482535	0.474718	0.0619129	74.4294	217.63	0.0154053	642.121	3210.55	-0.604109	0.935872	1.16886	1.28252	1.62206	1.55441	0.715632	-0.698478	0.246263	0.969203	0.816697	-0.577067	0.498822	2.93722	3.84087	8.69149	81.3085	115.385	0.388734	2.21519	0.369199	0.475275	0.17076	0.981653	4.90708
1166	736.294	819.002	5	100	0	0	0	0.696995	0	0.498564	26.3566	23.5292	0.347454	0.404288	0.317	0.451601	0.454108	0.472155	0.248566	694.67	553.623	0.123926	18309.1	13026.3	-0.302279	1.42089	1.37161	1.64636	2.66077	2.75666	0.940418	0.340019	0.478165	0.87827	-0.999464	-0.0327391	0.706091	5.13387	4.85069	20.3317	69.6683	84.7126	0.589452	2.44661	0.407768	0.427944	0.0634084	1.00884	5.98588
348	765.522	833.042	5	100	0	0	0	0.644062	0	0.29997	18.9669	28.2765	0.375866	0.407907	0.368809	0.483637	0.464105	0.434781	0.089982	359.743	799.56	0.0269919	6823.22	22608.8	-0.522922	1.278	1.45143	1.34982	1.80507	2.97862	0.117075	0.993123	0.295492	0.955345	-0.00216612	-0.999998	0.547695	4.3551	5.31757	22.0778	67.9222	80.5193	0.613079	2.53511	0.422518	0.421344	0.0466689	1.0402	6.42676
1491	614.625	842.426	5	100	0	0	0	2.09611	1	0.618611	2.22755	73.0544	0.242615	0.465846	0.239497	0.492099	0.495637	0.472798	0.38268	4.96198	5336.95	0.23673	11.0531	389887	-0.208582	0.347827	1.86365	1.85635	2.6335	1.92398	0.791978	-0.610549	0.579904	0.814685	-0.7158	-0.698305	0.786518	1.4925	8.54719	14.0409	75.9591	100.702	0.49256	2.40849	0.401415	0.469322	0.124726	1.02205	5.80083
341	597.302	828.198	5	100	0	0	0	0.618239	0	0.626708	48.9805	28.5052	0.154552	0.48636	0.155645	0.483314	0.487953	0.459969	0.392763	2399.09	812.546	0.246148	117509	23161.8	-0.202935	1.69002	1.45492	1.87144	3.44726	1.58362	-0.959433	0.281938	0.586482	0.809963	-0.228821	-0.973469	0.791649	6.99861	5.33903	8.89081	81.1092	114.82	0.393131	2.22779	0.371299	0.471642	0.167775	0.983829	4.96306
588	598.875	851.519	5	100	0	0	0	0.442126	0	0.618611	2.22755	72.9578	0.248441	0.464242	0.244969	0.492401	0.495683	0.473029	0.38268	4.96198	5322.84	0.23673	11.0531	388343	-0.208582	0.347827	1.86307	1.85635	2.6335	1.95129	0.791978	-0.610549	0.579904	0.814685	-0.645111	-0.764089	0.786518	1.4925	8.54153	14.3853	75.6147	99.7907	0.498439	2.41877	0.403128	0.468635	0.121737	1.02429	5.85042
340	565.289	843.508	5	100	0	0	0	0.621607	0	0.599176	26.3566	20.2963	0.155239	0.486585	0.154767	0.482474	0.487333	0.464588	0.359012	694.67	411.94	0.215111	18309.1	8360.85	-0.222446	1.42089	1.30742	1.82062	3.22752	1.58328	0.940418	0.340019	0.563962	0.825801	0.992315	0.123734	0.774065	5.13387	4.50514	8.93066	81.0693	114.707	0.394004	2.23099	0.371831	0.473531	0.168157	0.98536	4.9773
693	565.042	869.398	5	100	0	0	0	0.708895	0	0.40393	20.8367	33.6285	0.392591	0.386511	0.405368	0.486671	0.454105	0.391044	0.163159	434.168	1130.88	0.065905	9046.63	38029.7	-0.393694	1.31883	1.52671	1.4977	2.20891	3.13584	0.914572	-0.404423	0.393035	0.919523	0.801033	-0.59862	0.635555	4.56472	5.79901	23.1158	66.8842	78.0772	0.626571	2.51629	0.419382	0.39898	0.0413066	1.03142	6.33172
875	585.473	872.699	5	100	0	0	0	0.694912	0	0.374312	10.6829	31.2823	0.321579	0.414596	0.345175	0.49582	0.487295	0.408897	0.140109	114.124	978.582	0.0524447	1219.18	30612.3	-0.426766	1.02869	1.4953	1.45399	2.06119	2.52765	-0.951514	-0.307604	0.365632	0.930759	-0.133229	0.991085	0.61181	3.26847	5.59306	18.7584	71.2416	88.5817	0.567079	2.47336	0.412227	0.411747	0.0712078	1.02222	6.11752
609	569.52	859.188	5	100	0	0	0	0.653719	0	0.348836	18.5703	15.8963	0.25315	0.431426	0.228138	0.447516	0.467185	0.496424	0.121687	344.856	252.692	0.0424487	6404.08	4016.87	-0.457379	1.26882	1.2013	1.41742	1.98339	2.09101	-0.27564	0.961261	0.341804	0.939771	-0.187225	-0.982317	0.590623	4.30933	3.98702	14.664	75.336	99.0564	0.50314	2.32384	0.387306	0.439471	0.115924	0.983478	5.40023
779	831.326	706.704	5	100	0	0	0	0.687365	0	0.591673	26.6377	23.6456	0.365806	0.372592	0.320718	0.418028	0.427715	0.468703	0.350077	709.567	559.114	0.207131	18901.2	13220.6	-0.227918	1.4255	1.37375	1.80701	3.18239	2.90455	0.997833	0.06579	0.55775	0.830009	-0.996503	0.0835576	0.769203	5.16117	4.86267	21.4572	68.5428	81.9976	0.604819	2.37356	0.395594	0.39531	0.052731	0.97615	5.6338
778	809.674	709.464	5	100	0	0	0	0.630348	0	0.541172	28.352	32.8324	0.324511	0.406793	0.352215	0.49329	0.484552	0.399538	0.292867	803.836	1077.97	0.158491	22790.4	35392.2	-0.266665	1.45258	1.5163	1.71802	2.89236	2.594	-0.0775881	-0.996986	0.515141	0.857106	0.988116	0.153711	0.735644	5.32466	5.72996	18.936	71.064	88.1409	0.569659	2.4609	0.41015	0.403166	0.0682089	1.01617	6.05602
1190	846.491	730.324	5	100	0	0	0	0.595093	0	0.549354	24.4015	26.6268	0.325314	0.434898	0.322695	0.493667	0.485873	0.454003	0.30179	595.433	708.986	0.165789	14529.5	18878	-0.260148	1.38742	1.42532	1.73213	2.92858	2.58992	-0.667794	0.744346	0.522136	0.852862	0.997057	0.0766623	0.741184	4.93979	5.16012	18.9846	71.0154	88.0202	0.570363	2.51645	0.419408	0.44445	0.0769101	1.04163	6.33252
365	784.235	757.896	5	100	0	0	0	0.584271	0	0.618267	37.3072	14.8043	0.0618095	0.497623	0.0613928	0.460092	0.458742	0.443305	0.382254	1391.83	219.167	0.236335	51925.2	3244.62	-0.208824	1.57179	1.17039	1.85571	3.37493	1.20244	-0.381956	0.924181	0.579624	0.814884	0.785599	-0.618736	0.7863	6.10796	3.84764	3.54368	86.4563	130.458	0.248615	1.98296	0.330494	0.451024	0.209049	0.934808	3.93215
638	799.5	770.33	5	100	0	0	0	0.543712	0	0.160281	4.98094	81.3716	0.284369	0.0395988	0.250099	0.13583	0.497325	0.495173	0.02569	24.8098	6621.34	0.00411762	123.576	538789	-0.795118	0.697311	1.91047	1.17384	1.3642	2.23529	-0.964156	0.265335	0.159596	0.987182	-0.304877	0.952392	0.400351	2.2318	9.02062	16.5211	73.4789	94.2328	0.533263	1.70239	0.283732	0.267234	0.185977	0.809915	2.89815
584	824.781	778.004	5	100	0	0	0	0.941872	1	0.259762	12.699	21.4604	0.0951523	0.485117	0.100283	0.465054	0.470197	0.424955	0.0674763	161.265	460.549	0.0175278	2047.9	9883.56	-0.585424	1.10377	1.33164	1.29662	1.66381	1.3259	0.132241	0.991218	0.256851	0.966451	0.506179	-0.862428	0.509669	3.56357	4.63254	5.46009	84.5399	124.739	0.308468	2.04076	0.340126	0.445005	0.188828	0.934022	4.16469
527	832.87	771.767	5	100	0	0	0	0.572581	0	0.544364	19.2911	20.9191	0.251172	0.463366	0.247961	0.492781	0.495739	0.472196	0.296332	372.147	437.609	0.161313	7179.12	9154.38	-0.264111	1.28536	1.32054	1.72351	2.88305	2.08573	0.427336	0.904093	0.517874	0.855457	0.878182	-0.478326	0.73781	4.39216	4.57374	14.5469	75.4531	99.3646	0.501171	2.42321	0.403869	0.467781	0.120148	1.0251	5.87197
374	836.595	750.119	5	100	0	0	0	0.572642	0	0.41471	16.5948	16.1458	0.17554	0.469774	0.164564	0.466071	0.47835	0.487674	0.171984	275.387	260.687	0.0713236	4570	4209	-0.382255	1.21997	1.20806	1.51393	2.24611	1.67458	-0.775077	-0.631867	0.402925	0.915233	-0.423981	-0.905671	0.64398	4.07367	4.01818	10.1101	79.8899	111.394	0.418975	2.24197	0.373662	0.467923	0.15793	0.981045	5.02644
371	818.293	744.261	5	100	0	0	0	0.575251	0	0.629913	35.7795	24.1096	0.112342	0.479049	0.119623	0.467369	0.474978	0.423426	0.39679	1280.17	581.273	0.249943	45803.9	14014.3	-0.200719	1.55363	1.38219	1.87745	3.44881	1.39713	-0.939778	-0.341785	0.589074	0.808079	-0.853748	0.520687	0.793671	5.9816	4.91015	6.45034	83.5497	121.834	0.335175	2.07679	0.346131	0.445398	0.179391	0.937948	4.31304
375	861.069	756.551	5	100	0	0	0	0.608519	0	0.593658	45.6237	6.5344	0.041118	0.468693	0.0374037	0.424752	0.43387	0.459815	0.35243	2081.52	42.6984	0.209223	94966.7	279.008	-0.226464	1.65919	0.815206	1.8106	3.22865	1.13029	0.997508	-0.0705479	0.559397	0.8289	0.248581	0.968611	0.770492	6.75453	2.55625	2.35655	87.6434	134.065	0.202776	1.86565	0.310942	0.429311	0.211064	0.896019	3.48066
562	878.741	787.377	5	100	0	0	0	0.637495	0	0.291635	52.7609	20.5673	0.0690619	0.494906	0.0708161	0.46196	0.461685	0.431666	0.085051	2783.71	423.014	0.0248038	146871	8700.25	-0.53516	1.72231	1.31318	1.33861	1.78615	1.22903	0.602137	-0.798393	0.287519	0.957775	0.989223	-0.146419	0.540032	7.26367	4.53512	3.96011	86.0399	129.204	0.262796	1.99009	0.331682	0.446676	0.203731	0.931457	3.96048
454	583.125	927.73	5	100	0	0	0	1.52851	1	0.291293	3.85822	62.1348	0.436911	0.19224	0.494112	0.366674	0.417991	0.306686	0.0848516	14.8859	3860.73	0.0247167	57.4329	239886	-0.53567	0.586387	1.79333	1.33816	1.71891	3.22203	-0.656845	-0.754025	0.287191	0.957873	-0.641961	0.766737	0.539716	1.96424	7.88256	25.907	64.093	71.6967	0.660992	2.21461	0.369102	0.392332	0.107515	0.93553	4.90452
453	573.572	928.833	5	100	0	0	0	0.903391	1	0.306754	12.5021	68.0302	0.402273	0.124196	0.43504	0.274796	0.472371	0.414626	0.094098	156.303	4628.11	0.0288649	1954.11	314851	-0.51321	1.09698	1.8327	1.35901	1.81996	3.19804	-0.0642264	0.997935	0.301966	0.953319	-0.884228	0.467056	0.553854	3.53583	8.24804	23.7204	66.2796	76.6722	0.63425	2.1233	0.353884	0.40845	0.130895	0.914915	4.50841
450	558.171	930.052	5	100	0	0	0	1.04565	1	0.337294	7.38793	22.2542	0.309796	0.432853	0.290983	0.473328	0.476547	0.479127	0.113767	54.5815	495.249	0.038373	403.244	11021.4	-0.471991	0.868523	1.34741	1.40115	1.90624	2.41144	0.893349	0.449363	0.330935	0.943654	-0.260028	-0.965601	0.58077	2.71807	4.71744	18.0469	71.9531	90.3599	0.556593	2.46263	0.410439	0.453091	0.0871143	1.02406	6.06457
1499	574.25	921.018	5	100	0	0	0	2.28737	1	0.436283	2.72818	26.6822	0.246258	0.464151	0.2487	0.496386	0.498601	0.462291	0.190343	7.44297	711.94	0.0830434	20.3058	18996.1	-0.360232	0.435873	1.42622	1.54695	2.1218	1.958	0.401737	-0.915755	0.422574	0.906329	0.999772	0.0213359	0.660517	1.65172	5.16548	14.2562	75.7438	100.132	0.496244	2.41639	0.402731	0.463221	0.121237	1.02306	5.83893
1508	573.625	923.833	5	100	0	0	0	1.37561	1	0.282792	3.85822	79.6813	0.449451	0.130975	0.404538	0.233743	0.470947	0.396184	0.0799713	14.8859	6349.11	0.0226152	57.4329	505905	-0.548533	0.586387	1.90136	1.32683	1.69378	3.32543	-0.656845	-0.754025	0.279038	0.96028	-0.909252	-0.416246	0.531782	1.96424	8.92644	26.7085	63.2915	69.9147	0.670411	2.08584	0.34764	0.400361	0.134967	0.903438	4.35072
401	922.12	426.899	5	100	0	0	0	0.766295	0	0.316345	18.2333	32.0012	0.306991	0.425248	0.327168	0.497412	0.492092	0.419354	0.100074	332.453	1024.08	0.031658	6061.72	32771.7	-0.499839	1.26087	1.50517	1.3721	1.86246	2.45287	-0.577984	0.816048	0.311095	0.950379	0.552427	0.833561	0.562446	4.27005	5.65696	17.878	72.122	90.7848	0.554068	2.46827	0.411378	0.422301	0.0802005	1.0235	6.09233
1380	885.344	398.53	5	100	0	0	0	0.69393	0	0.48164	14.5218	28.242	0.286881	0.439332	0.302031	0.498823	0.496739	0.433038	0.231977	210.883	797.611	0.111729	3062.4	22526.1	-0.317277	1.16202	1.4509	1.61873	2.54049	2.3063	0.926936	-0.375219	0.463233	0.886236	0.0323282	-0.999477	0.694003	3.81075	5.31432	16.6713	73.3287	93.848	0.535613	2.45684	0.409474	0.436185	0.0934005	1.02452	6.03608
404	937.594	404.641	5	100	0	0	0	0.522371	0	0.634577	45.8411	15.5404	0.0331385	0.49922	0.0332003	0.45202	0.44708	0.429145	0.402688	2101.41	241.504	0.255537	96330.8	3753.07	-0.197516	1.66126	1.19146	1.88622	3.49672	1.10421	0.958812	-0.284041	0.592837	0.805323	0.16678	-0.985994	0.796603	6.77061	3.94213	1.89904	88.101	135.469	0.18204	1.8938	0.315634	0.438113	0.220018	0.9164	3.58649
1483	904.5	401.403	5	100	0	0	0	0.655898	0	0.618624	2.22755	80.8685	0.390309	0.398481	0.384952	0.481676	0.456348	0.422461	0.382696	4.96198	6539.71	0.236745	11.0531	528857	-0.208573	0.347827	1.90778	1.85637	2.63354	2.69736	0.791978	-0.610549	0.579915	0.814677	-0.72629	0.687389	0.786527	1.4925	8.99269	22.9737	67.0263	78.4093	0.624747	2.53423	0.422371	0.410471	0.0391674	1.03829	6.42231
1513	905.25	418.29	5	100	0	0	0	1.73153	1	0.618624	2.22755	85.7895	0.241561	0.0342427	0.246262	0.130685	0.489753	0.496482	0.382696	4.96198	7359.84	0.236745	11.0531	631397	-0.208573	0.347827	1.93343	1.85637	2.63354	1.91962	0.791978	-0.610549	0.579915	0.814677	-0.822901	-0.568185	0.786527	1.4925	9.26226	13.9787	76.0213	100.867	0.491489	1.63899	0.273164	0.243912	0.187557	0.789684	2.68627
395	884.916	420.43	5	100	0	0	0	0.602546	0	0.687196	33.0022	28.6117	0.0720816	0.444992	0.0817264	0.425378	0.445613	0.373933	0.472238	1089.15	818.629	0.32452	35944.2	23422.4	-0.162919	1.51854	1.45654	1.98813	3.8434	1.24015	0.99988	-0.0154765	0.634372	0.773028	-0.331003	-0.94363	0.828973	5.74475	5.34899	4.13356	85.8664	128.684	0.26848	1.84372	0.307287	0.399655	0.180379	0.853953	3.39932
1444	905.127	406.758	5	100	0	0	0	0.671661	0	0.496033	21.5969	54.2202	0.456099	0.21494	0.493816	0.377442	0.414965	0.296369	0.246049	466.426	2939.83	0.122048	10073.4	159398	-0.304489	1.33439	1.73416	1.64219	2.6374	3.77745	0.384115	-0.923285	0.47594	0.879478	-0.726438	-0.687232	0.704296	4.64725	7.36344	27.1357	62.8643	68.9741	0.675351	2.25363	0.375605	0.396203	0.104017	0.948985	5.07885
441	950.751	483.286	5	100	0	0	0	0.57569	0	0.668088	58.9767	21.7007	0.272795	0.453386	0.262978	0.486038	0.489564	0.478625	0.446342	3478.25	470.92	0.298195	205136	10219.3	-0.175166	1.77068	1.33647	1.9505	3.74795	2.23569	0.65453	-0.756036	0.619486	0.785008	0.286382	-0.958116	0.817367	7.67963	4.6584	15.8307	74.1693	96.0122	0.522298	2.44339	0.407231	0.466006	0.108719	1.0267	5.97014
440	927.086	504.815	5	100	0	0	0	0.751715	0	0.427759	12.302	29.3944	0.189216	0.442098	0.20996	0.472195	0.487963	0.408415	0.182978	151.339	864.031	0.0782704	1861.77	25397.7	-0.368801	1.08998	1.46826	1.53382	2.28592	1.74286	-0.261302	0.965257	0.414833	0.909898	-0.900129	-0.435623	0.654033	3.50742	5.42166	10.907	79.093	109.183	0.43499	2.20985	0.368308	0.425256	0.13365	0.950376	4.88342
362	828.177	681.396	5	100	0	0	0	0.479985	0	0.63049	31.3444	23.0672	0.23028	0.422468	0.203035	0.429918	0.457606	0.499334	0.397518	982.471	532.096	0.250631	30795	12274	-0.200322	1.49616	1.36299	1.87853	3.44222	1.97205	-0.0714656	0.997443	0.589541	0.807739	-0.88009	-0.474807	0.794034	5.59861	4.80283	13.3136	76.6864	102.64	0.479875	2.24264	0.373773	0.426193	0.124947	0.957235	5.02944
355	741.991	745.431	5	100	0	0	0	0.537268	0	0.556481	49.208	21.6325	0.296065	0.445212	0.285729	0.486412	0.486907	0.473902	0.309671	2421.43	467.965	0.172326	119154	10123.3	-0.25455	1.69204	1.33511	1.74452	3.00572	2.38938	-0.871122	0.491067	0.528201	0.849119	0.351009	-0.936372	0.745977	7.01484	4.65108	17.2214	72.7786	92.4453	0.544119	2.47423	0.412371	0.459557	0.0953599	1.03236	6.1218
1068	716.338	723.571	5	100	0	0	0	0.513972	0	0.762376	22.1077	17.5541	0.153536	0.486977	0.153465	0.48256	0.48738	0.46337	0.581217	488.75	308.146	0.443106	10805.1	5409.23	-0.117831	1.34454	1.24438	2.14336	4.36634	1.5738	-0.116288	-0.993216	0.690642	0.723197	-0.962333	0.271875	0.873141	4.70188	4.18976	8.8319	81.1681	114.987	0.391837	2.22729	0.371215	0.472965	0.16887	0.984574	4.96081
321	741.267	609.371	5	100	0	0	0	0.568643	0	0.511823	64.3496	10.2253	0.166464	0.437573	0.147905	0.428353	0.454401	0.493079	0.261963	4140.87	104.557	0.134079	266463	1069.12	-0.29088	1.80855	1.00968	1.66833	2.76093	1.63255	0.998593	0.0530245	0.489767	0.871853	-0.71772	-0.696332	0.715418	8.02182	3.1977	9.58229	80.4177	112.871	0.408	2.12777	0.354629	0.432963	0.154647	0.93496	4.52743
1005	731.7	625.097	5	100	0	0	0	1.20637	1	0.630714	3.52206	27.4773	0.154982	0.452361	0.171185	0.465766	0.481665	0.408677	0.3978	12.4049	755.002	0.250898	43.6908	20745.4	-0.200168	0.546797	1.43897	1.87895	2.91493	1.5573	-0.371354	-0.928491	0.589722	0.807607	0.715286	-0.698831	0.794175	1.87672	5.24188	8.91575	81.0842	114.749	0.393678	2.13464	0.355773	0.430519	0.151304	0.934832	4.55667
12	448.258	39.768	5	100	0	0	0	0.45342	0	0.617948	82.4808	30.8097	0.425546	0.343521	0.376945	0.41008	0.394218	0.424563	0.38186	6803.08	949.238	0.235969	561124	29245.7	-0.209048	1.91635	1.48869	1.85512	3.40998	3.50037	0.716932	0.697143	0.579364	0.815069	-0.56977	0.821804	0.786097	9.08189	5.55065	25.1852	64.8148	73.3205	0.652339	2.37487	0.395812	0.402149	0.0316454	0.972117	5.64002
1229	493.875	53.91	5	100	0	0	0	1.01281	1	0.618622	2.22755	73.5606	0.450418	0.133032	0.407166	0.237244	0.470948	0.39501	0.382693	4.96198	5411.16	0.236742	11.0531	398048	-0.208575	0.347827	1.86665	1.85637	2.63353	3.0596	0.791978	-0.610549	0.579913	0.814678	-0.964612	-0.263672	0.786525	1.4925	8.57675	26.7705	63.2295	69.7777	0.671132	2.09382	0.34897	0.401088	0.134006	0.905797	4.38407
45	469.814	97.889	5	100	0	0	0	0.563881	0	0.232875	41.104	19.6837	0.162775	0.484597	0.164684	0.485254	0.490171	0.459245	0.0542308	1689.54	387.448	0.012629	69446.8	7626.41	-0.632877	1.61388	1.29411	1.26222	1.58903	1.62	-0.260264	-0.965538	0.230776	0.973007	0.740722	0.671812	0.482571	6.41124	4.43663	9.368	80.632	113.473	0.403454	2.24673	0.374454	0.471921	0.163585	0.987469	5.04778
47	515.546	77.562	5	100	0	0	0	0.418611	0	0.52761	50.2307	21.1785	0.232188	0.455893	0.216984	0.46988	0.481826	0.491017	0.278372	2523.12	448.529	0.146872	126738	9499.17	-0.277687	1.70097	1.3259	1.69488	2.84127	1.98551	-0.0347754	0.999395	0.50347	0.864013	0.726111	-0.687578	0.726368	7.08736	4.60201	13.4259	76.5741	102.339	0.481859	2.34779	0.391298	0.462886	0.12976	1.00144	5.51211
679	506.625	100.675	5	100	0	0	0	2.05871	1	0.618623	2.22755	29.6856	0.337128	0.419452	0.351504	0.497948	0.484901	0.421718	0.382694	4.96198	881.235	0.236744	11.0531	26160	-0.208574	0.347827	1.47255	1.85637	2.63354	2.38657	0.791978	-0.610549	0.579914	0.814678	-0.987302	-0.158854	0.786526	1.4925	5.44845	19.702	70.298	86.2509	0.580627	2.51265	0.418775	0.420585	0.0660935	1.03638	6.31342
46	481.488	88.203	5	100	0	0	0	0.360454	0	0.67326	30.4612	28.6292	0.314919	0.429304	0.329649	0.499284	0.491606	0.428361	0.453279	927.885	819.631	0.305175	28264.5	23465.4	-0.171817	1.48375	1.45681	1.96062	3.73371	2.52192	-0.816156	0.577832	0.623538	0.781793	-0.347465	-0.937693	0.820524	5.51917	5.35063	18.3559	71.6441	89.5855	0.561176	2.49312	0.41552	0.428833	0.0783004	1.03276	6.21566
278	911.677	185.91	5	100	0	0	0	0.736971	0	0.678912	29.8857	18.8708	0.0967743	0.493158	0.0948028	0.466923	0.46932	0.458699	0.460922	893.155	356.107	0.312925	26692.6	6720.03	-0.168187	1.47546	1.27579	1.97173	3.77222	1.33364	-0.999177	0.0405587	0.627947	0.778256	0.0212425	0.999774	0.823961	5.46678	4.34405	5.55345	84.4465	124.463	0.311086	2.07968	0.346613	0.462811	0.194627	0.954065	4.32506
573	898.714	177.412	5	100	0	0	0	0.986961	1	0.393796	4.16736	61.1654	0.440112	0.147292	0.440539	0.281861	0.470613	0.394224	0.155075	17.3669	3741.21	0.061068	72.3741	228832	-0.404729	0.619861	1.78651	1.4826	2.0536	3.27558	-0.855112	-0.518443	0.383697	0.923459	-0.995428	-0.0955109	0.627532	2.04141	7.82083	26.111	63.889	71.2409	0.663409	2.17464	0.36244	0.417168	0.1246	0.930485	4.72906
461	868.014	176.95	5	100	0	0	0	0.820909	0	0.439732	9.58103	17.3373	0.281165	0.410007	0.24827	0.431837	0.454977	0.494944	0.193364	91.7961	300.582	0.0850284	879.502	5211.28	-0.356812	0.981412	1.23898	1.55229	2.31839	2.24059	-0.155617	-0.987817	0.425697	0.904866	-0.998287	0.058507	0.663123	3.09532	4.16381	16.3297	73.6703	94.7244	0.53025	2.3212	0.386867	0.420922	0.0992566	0.97327	5.38797
1458	854.986	159.357	5	100	0	0	0	0.565239	0	0.480398	11.3583	29.5025	0.407065	0.384422	0.388056	0.463917	0.438008	0.424251	0.230782	129.011	870.398	0.110867	1465.35	25678.9	-0.318399	1.05531	1.46986	1.61672	2.51383	3.20094	-0.934933	0.354824	0.462132	0.886811	-0.941874	-0.335966	0.693107	3.37021	5.43162	24.0206	65.9794	75.9791	0.638016	2.50572	0.41762	0.415658	0.0306287	1.02525	6.27863
770	854.027	117.997	5	100	0	0	0	0.521093	0	0.610146	19.3553	19.6419	0.151857	0.439148	0.134239	0.425479	0.452613	0.493064	0.372278	374.628	385.804	0.227144	7251.03	7577.93	-0.214566	1.2868	1.29318	1.8407	3.26415	1.56609	0.484459	0.874814	0.572987	0.819564	0.712001	0.702178	0.781118	4.39947	4.43192	8.73456	81.2654	115.263	0.389688	2.0964	0.3494	0.432314	0.161526	0.928943	4.39489
424	883.529	112.66	5	100	0	0	0	0.578574	0	0.631634	49.8838	16.656	0.183356	0.478346	0.177749	0.480701	0.487848	0.478578	0.398962	2488.39	277.422	0.251998	124131	4620.75	-0.199535	1.69796	1.22157	1.88068	3.48153	1.71963	-0.372482	0.928039	0.590464	0.807064	-0.812272	-0.583279	0.794754	7.06285	4.08118	10.5653	79.4347	110.128	0.428201	2.28658	0.381096	0.478462	0.155389	0.99606	5.22844
100	883.182	158.093	5	100	0	0	0	0.763167	0	0.679852	49.8594	36.754	0.414786	0.365981	0.429324	0.47763	0.433235	0.366348	0.462199	2485.96	1350.86	0.314227	123948	49649.4	-0.167586	1.69775	1.5653	1.97359	3.82444	3.38865	-0.395013	0.918675	0.628678	0.777666	-0.810562	0.585652	0.824531	7.06112	6.06251	24.5058	65.4942	74.8656	0.644039	2.4873	0.414551	0.422055	0.0429626	1.01997	6.18668
827	730.939	209.399	5	100	0	0	0	0.523044	0	0.670623	36.159	24.1163	0.136352	0.477936	0.144403	0.475281	0.483043	0.431584	0.449735	1307.47	581.596	0.301603	47276.9	14025.9	-0.173522	1.55822	1.38231	1.95546	3.73155	1.49966	-0.999529	0.0306797	0.621474	0.783435	-0.85024	0.526395	0.818916	6.01324	4.91083	7.83681	82.1632	117.824	0.369259	2.1486	0.3581	0.453433	0.169671	0.955696	4.61648
97	763.665	193.353	5	100	0	0	0	0.544336	0	0.507367	58.5548	29.0043	0.00817887	0.441488	0.00935881	0.393389	0.409401	0.345103	0.257421	3428.66	841.249	0.130607	200765	24399.9	-0.294678	1.76756	1.46246	1.66091	2.73469	1.02483	0.906728	-0.421715	0.485878	0.874027	-0.666844	-0.745197	0.712297	7.65211	5.38556	0.46862	89.5314	139.903	0.0904371	1.60692	0.26782	0.369246	0.203057	0.797826	2.58219
1497	751.969	163.841	5	100	0	0	0	1.9097	1	0.345985	4.45509	91.1996	0.0479371	0.00140158	0.0501241	0.0233849	0.426385	0.465456	0.119706	19.8478	8317.37	0.0414163	88.4239	758541	-0.460943	0.648856	1.95999	1.41338	1.90047	1.15281	-0.967081	-0.254469	0.339123	0.940742	-0.0932773	-0.99564	0.588205	2.11071	9.54985	2.74765	87.2524	132.871	0.218945	1.01469	0.169115	0.0490306	0.215506	0.635463	1.02959
1127	740.931	145.753	5	100	0	0	0	0.79649	0	0.556488	34.1113	49.0497	0.457887	0.250833	0.495338	0.409516	0.383062	0.242071	0.309679	1163.58	2405.87	0.172333	39691.3	118007	-0.254544	1.5329	1.69064	1.74453	2.98951	3.83088	0.431558	-0.902085	0.528207	0.849115	-0.937642	0.347603	0.745981	5.84049	7.00355	27.2508	62.7492	68.7216	0.676673	2.23871	0.373118	0.396289	0.105522	0.943915	5.01181
65	953.4	84.697	5	100	0	0	0	1.18779	1	0.210596	4.98094	90.6989	0.125495	0.00829883	0.120631	0.0618343	0.458979	0.48809	0.0443507	24.8098	8226.29	0.00934007	123.576	746115	-0.67655	0.697311	1.9576	1.23441	1.49796	1.44302	-0.964156	0.265335	0.209043	0.977906	0.39612	-0.918199	0.458907	2.2318	9.5236	7.20934	82.7907	119.63	0.354253	1.26333	0.210555	0.123063	0.208368	0.695044	1.596
64	937.809	88.157	5	100	0	0	0	0.84208	0	0.672167	19.0322	46.3363	0.477314	0.305091	0.440924	0.403935	0.3375	0.334297	0.451808	362.225	2147.05	0.303691	6893.93	99486.5	-0.172523	1.27949	1.66592	1.95848	3.66371	3.98689	0.18163	0.983367	0.622683	0.782474	0.708655	-0.705555	0.819858	4.36259	6.80708	28.5101	61.4899	65.991	0.690879	2.29906	0.383177	0.370718	0.0681182	0.950867	5.28568
184	949.5	87.036	5	100	0	0	0	1.16096	1	0.618624	2.22755	80.9203	0.383417	0.100161	0.389975	0.229364	0.489133	0.447421	0.382696	4.96198	6548.09	0.236745	11.0531	529874	-0.208573	0.347827	1.90806	1.85637	2.63354	2.6575	0.791978	-0.610549	0.579915	0.814677	-0.689725	0.724072	0.786527	1.4925	8.99557	22.5455	67.4545	79.4144	0.619207	2.03947	0.339912	0.386696	0.146919	0.895079	4.15944
59	817.074	84.601	5	100	0	0	0	0.715552	0	0.277088	21.3077	46.323	0.411915	0.336381	0.4506	0.470189	0.419765	0.319939	0.0767778	454.018	2145.82	0.0212742	9674.08	99400.8	-0.557382	1.32854	1.6658	1.31928	1.72817	3.32618	0.631471	-0.7754	0.273556	0.961856	0.717976	-0.696068	0.526391	4.61603	6.8061	24.3252	65.6748	75.2792	0.641806	2.40879	0.401465	0.41584	0.060768	0.992727	5.80226
1187	863.26	61.941	5	100	0	0	0	0.617612	0	0.636265	27.3726	4.9615	0.0300268	0.434569	0.0260619	0.390614	0.412796	0.458889	0.404833	749.259	24.6165	0.257581	20509.2	122.135	-0.196362	1.43732	0.695613	1.88941	3.46815	1.09356	0.784404	-0.620251	0.594195	0.804321	-0.969132	0.246543	0.797662	5.23188	2.22744	1.72067	88.2793	136.018	0.173282	1.75296	0.292159	0.401705	0.205838	0.850876	3.07286
1210	828.068	65.706	5	100	0	0	0	0.390315	0	0.623921	34.4011	44.778	0.43439	0.290738	0.482234	0.445108	0.366276	0.255619	0.389277	1183.44	2005.07	0.242878	40711.5	89783	-0.20487	1.53657	1.65106	1.86623	3.40626	3.57766	0.155782	-0.987791	0.584222	0.811594	0.714356	0.699783	0.789887	5.86525	6.69164	25.7465	64.2535	72.0562	0.659083	2.27436	0.379061	0.400333	0.0908521	0.95047	5.17274
561	838.258	106.068	5	100	0	0	0	0.598656	0	0.502737	23.9914	41.4396	0.384678	0.355828	0.424465	0.478871	0.445793	0.344238	0.252744	575.587	1717.24	0.127064	13809.1	71161.8	-0.298659	1.38006	1.61742	1.65324	2.67738	3.08188	-0.909193	0.416375	0.481826	0.876267	-0.563731	-0.825959	0.709039	4.8981	6.43736	22.6238	67.3762	79.2302	0.620224	2.43387	0.405645	0.404571	0.0529533	1.00065	5.92374
162	867.375	87.685	5	100	0	0	0	0.671147	0	0.618623	2.22755	44.0937	0.409262	0.320902	0.457566	0.463451	0.411373	0.29955	0.382694	4.96198	1944.25	0.236744	11.0531	85729.4	-0.208574	0.347827	1.64438	1.85637	2.63354	2.79869	0.791978	-0.610549	0.579914	0.814678	0.111173	0.993801	0.786526	1.4925	6.64031	24.1585	65.8415	75.6619	0.639736	2.3621	0.393684	0.410318	0.0687929	0.976517	5.57954
60	848.906	85.219	5	100	0	0	0	0.453824	0	0.687165	32.7382	34.4047	0.304541	0.399072	0.339447	0.485467	0.484607	0.387622	0.472196	1071.79	1183.68	0.324476	35088.5	40724.3	-0.162939	1.51505	1.53662	1.98807	3.84232	2.45305	0.969277	0.245972	0.634348	0.773047	0.152225	-0.988346	0.828954	5.72173	5.86555	17.7306	72.2694	91.1563	0.551852	2.40076	0.400126	0.393347	0.0740216	0.993982	5.76363
542	924	92.232	5	100	0	0	0	1.87529	1	0.618624	2.22755	22.8641	0.18862	0.477297	0.19354	0.490162	0.495382	0.455034	0.382696	4.96198	522.767	0.236745	11.0531	11952.6	-0.208573	0.347827	1.35915	1.85637	2.63354	1.67824	0.791978	-0.610549	0.579915	0.814677	-0.766229	-0.642568	0.786527	1.4925	4.78164	10.8723	79.1277	109.279	0.434304	2.30004	0.383339	0.466166	0.149581	0.996778	5.29016
784	741.973	114.716	5	100	0	0	0	0.637819	0	0.606278	20.0479	17.2627	0.148827	0.487004	0.14634	0.478995	0.484391	0.469247	0.367573	401.918	298.001	0.222851	8057.62	5144.3	-0.217328	1.30207	1.23711	1.83359	3.24451	1.55182	0.931438	0.363901	0.569813	0.821775	-0.999871	-0.0160589	0.778639	4.47749	4.15484	8.55896	81.441	115.761	0.385781	2.2148	0.369134	0.474121	0.171722	0.982345	4.90536
882	772.22	125.642	5	100	0	0	0	0.461683	0	0.435855	40.5269	25.2151	0.374853	0.394573	0.344948	0.452909	0.446373	0.457556	0.18997	1642.43	635.801	0.0827992	66562.6	16031.8	-0.360658	1.60774	1.40166	1.54628	2.36892	2.9984	0.30868	-0.951166	0.422186	0.906509	0.0822657	0.99661	0.660193	6.36607	5.02146	22.0152	67.9848	80.6679	0.612252	2.47121	0.411869	0.420473	0.0471378	1.01436	6.10689
910	775.3	290.181	5	100	0	0	0	0.536509	0	0.540158	18.028	28.092	0.0184894	0.449238	0.0209189	0.404796	0.418937	0.35599	0.291771	325.009	789.16	0.157602	5859.26	22169.1	-0.267479	1.25595	1.44858	1.71628	2.85448	1.05694	-0.732206	0.681083	0.514272	0.857627	0.181325	-0.983423	0.734954	4.24594	5.30019	1.05942	88.9406	138.063	0.135976	1.66837	0.278062	0.380393	0.202377	0.817735	2.78346
1305	795.237	312.59	5	100	0	0	0	0.556737	0	0.30926	6.86576	29.2959	0.38551	0.389621	0.355675	0.452265	0.441798	0.450583	0.0956417	47.1387	858.25	0.0295782	323.643	25143.2	-0.509676	0.836689	1.46681	1.36242	1.80735	2.9493	0.550176	0.835049	0.304354	0.952559	-0.852927	-0.522031	0.556111	2.62026	5.41257	22.6754	67.3246	79.1088	0.620895	2.47545	0.412575	0.41571	0.0409167	1.01473	6.12786
506	593.297	432.607	5	100	0	0	0	0.595639	0	0.362303	15.4329	8.55004	0.112669	0.456577	0.101368	0.432514	0.452032	0.483468	0.131263	238.174	73.1032	0.0475571	3675.72	625.035	-0.440928	1.18845	0.931968	1.43663	2.0299	1.39267	0.271608	-0.962408	0.354429	0.935083	0.767376	-0.641198	0.601916	3.92847	2.92405	6.46919	83.5308	121.779	0.335662	2.03863	0.339771	0.442273	0.181057	0.925513	4.156
298	584.564	412.005	5	100	0	0	0	0.786034	0	0.580814	34.6524	7.00647	0.0398699	0.473538	0.0365692	0.428935	0.435658	0.457795	0.337345	1200.79	49.0906	0.195935	41610.2	343.952	-0.235963	1.53973	0.845499	1.78749	3.13453	1.12614	-0.0947385	-0.995502	0.548705	0.836016	0.661851	0.749636	0.762112	5.88663	2.64697	2.28498	87.715	134.284	0.199674	1.87237	0.312061	0.432296	0.212712	0.900291	3.50575
579	543.517	378.116	5	100	0	0	0	0.595135	0	0.662399	61.5099	24.6806	0.0972072	0.491267	0.0994627	0.468847	0.4703	0.438226	0.438772	3783.47	609.132	0.290642	232721	15033.7	-0.17888	1.78895	1.39236	1.93944	3.70871	1.33646	-0.969198	0.246283	0.61501	0.788519	-0.436893	0.899514	0.813879	7.84282	4.96796	5.57837	84.4216	124.39	0.311781	2.06531	0.344218	0.453537	0.191212	0.945371	4.2655
1177	509.625	373.473	5	100	0	0	0	0.883694	0	0.420622	4.45509	12.9178	0.13204	0.471459	0.12234	0.453621	0.466908	0.483434	0.176923	19.8478	166.87	0.0744177	88.4239	2155.59	-0.376108	0.648856	1.11119	1.52291	2.1569	1.46365	-0.967081	-0.254469	0.408328	0.912835	0.34424	0.938882	0.648554	2.11071	3.59413	7.58749	82.4125	118.54	0.363373	2.1298	0.354967	0.460264	0.17672	0.95507	4.53606
878	529.767	360.44	5	100	0	0	0	0.65228	0	0.519041	10.5662	22.0344	0.273044	0.456281	0.270198	0.494356	0.495014	0.468549	0.269404	111.645	485.515	0.139831	1179.66	10698	-0.284798	1.02392	1.3431	1.68042	2.68983	2.20112	-0.909226	-0.416302	0.496048	0.868295	-0.0432379	-0.999065	0.720445	3.25057	4.69408	15.8455	74.1545	95.9738	0.522536	2.45744	0.409574	0.462415	0.107902	1.03185	6.03902
403	663.047	502.677	5	100	0	0	0	0.666962	0	0.544364	40.6796	30.9875	0.0661962	0.443284	0.0581843	0.407461	0.430003	0.471846	0.296332	1654.83	960.225	0.161313	67317.8	29755	-0.264111	1.60938	1.49119	1.72351	2.92809	1.21877	0.160408	-0.987051	0.517874	0.855457	-0.41544	0.909621	0.73781	6.37806	5.56664	3.79554	86.2045	129.699	0.257286	1.87697	0.312829	0.418732	0.195275	0.881949	3.52303
267	487.444	410.322	5	100	0	0	0	0.466381	0	0.603537	37.9666	31.759	0.234836	0.4283	0.26103	0.480165	0.492197	0.405789	0.364257	1441.46	1008.63	0.219843	54727.4	32033.2	-0.219296	1.5794	1.50187	1.82858	3.28112	2.00385	0.26431	0.964438	0.567558	0.823333	0.336383	0.941725	0.776876	6.1617	5.63551	13.582	76.418	101.922	0.484599	2.30232	0.383719	0.417045	0.110238	0.971703	5.30066
1431	516.898	407.58	5	100	0	0	0	0.614157	0	0.653198	22.7166	41.6775	0.397281	0.349107	0.435937	0.476357	0.436101	0.336223	0.426668	516.044	1737.01	0.278698	11722.8	72394.4	-0.184955	1.35634	1.6199	1.92168	3.56043	3.19148	-0.663473	-0.7482	0.607729	0.794144	-0.7425	-0.669846	0.808207	4.76619	6.45581	23.4083	66.5917	77.3958	0.630302	2.43101	0.405168	0.416609	0.0546441	0.999947	5.90979
1083	538.579	480.539	5	100	0	0	0	0.470298	0	0.665039	46.7516	37.1357	0.409751	0.357978	0.436038	0.478405	0.43375	0.35043	0.442277	2185.71	1379.06	0.294131	102186	51212.4	-0.177153	1.6698	1.56979	1.94457	3.71145	3.33806	0.363749	-0.931497	0.61709	0.786893	-0.534074	0.845438	0.815499	6.83751	6.09391	24.1892	65.8108	75.5913	0.640118	2.46635	0.411059	0.421751	0.0493346	1.01291	6.08289
1256	493.5	378.02	5	100	0	0	0	2.61776	1	0.618624	2.22755	23.4974	0.185211	0.471331	0.19459	0.487356	0.49445	0.442089	0.382696	4.96198	552.128	0.236745	11.0531	12973.6	-0.208573	0.347827	1.37102	1.85637	2.63354	1.66408	0.791978	-0.610549	0.579915	0.814677	-0.997918	-0.0645001	0.786527	1.4925	4.84741	10.6734	79.3266	109.828	0.430361	2.27503	0.379171	0.45671	0.14774	0.985779	5.17575
1422	484.5	393.609	5	100	0	0	0	0.520958	0	0.618624	2.22755	44.1605	0.465511	0.305298	0.475019	0.437444	0.350849	0.286287	0.382696	4.96198	1950.15	0.236745	11.0531	86119.6	-0.208573	0.347827	1.64503	1.85637	2.63354	3.14291	0.791978	-0.610549	0.579915	0.814677	0.177261	0.984164	0.786527	1.4925	6.64534	27.7433	62.2567	67.6472	0.682284	2.32041	0.386735	0.394147	0.0831634	0.965382	5.38429
1214	501.506	386.02	5	100	0	0	0	0.543219	0	0.67131	23.0957	41.6073	0.136589	0.45252	0.151606	0.458608	0.475608	0.402936	0.450657	533.411	1731.17	0.302531	12319.5	72029.2	-0.173077	1.36353	1.61917	1.9568	3.68657	1.50085	-0.893263	-0.449535	0.622012	0.783008	-0.693687	-0.720276	0.819335	4.8058	6.45037	7.85051	82.1495	117.784	0.369579	2.07787	0.346311	0.427728	0.158561	0.9194	4.31753
54	664.06	72.188	5	100	0	0	0	0.622685	0	0.623352	23.7837	23.4388	0.339861	0.399784	0.305467	0.441804	0.450216	0.477818	0.388568	565.664	549.377	0.242214	13453.6	12876.7	-0.205267	1.37628	1.36994	1.86517	3.36983	2.69406	-0.975513	0.219942	0.58376	0.811926	-0.992427	-0.122834	0.789526	4.87685	4.84136	19.8684	70.1316	85.843	0.582976	2.41495	0.402492	0.420794	0.0675882	0.997416	5.83198
731	387.375	270.849	5	100	0	0	0	2.64889	1	0.618621	2.22755	25.1028	0.0792044	0.466847	0.0720708	0.43345	0.446951	0.472884	0.382692	4.96198	630.151	0.236741	11.0531	15818.5	-0.208575	0.347827	1.39972	1.85637	2.63353	1.25704	0.791978	-0.610549	0.579912	0.814679	-0.0299368	0.999552	0.786525	1.4925	5.01027	4.54284	85.4572	127.46	0.281433	1.97141	0.328568	0.4402	0.196436	0.916884	3.88645
841	388.125	277.345	5	100	0	0	0	2.5222	1	0.618621	2.22755	25.027	0.0769925	0.475349	0.0710783	0.441185	0.450944	0.469922	0.382692	4.96198	626.351	0.236741	11.0531	15675.7	-0.208575	0.347827	1.39841	1.85637	2.63353	1.24932	0.791978	-0.610549	0.579912	0.814679	-0.105544	0.994415	0.786525	1.4925	5.0027	4.41572	85.5843	127.84	0.277475	1.98547	0.330912	0.446064	0.19937	0.925072	3.94209
905	388.875	281.242	5	100	0	0	0	1.15272	1	0.618621	2.22755	24.0182	0.0576646	0.478778	0.0534564	0.438946	0.445639	0.462785	0.382692	4.96198	576.874	0.236741	11.0531	13855.5	-0.208575	0.347827	1.38054	1.85637	2.63353	1.18321	0.791978	-0.610549	0.579912	0.814679	-0.897709	0.440589	0.786525	1.4925	4.90084	3.30577	86.6942	131.177	0.240135	1.93727	0.322878	0.442292	0.207532	0.916978	3.75301
969	389	285.788	5	100	0	0	0	1.13623	1	0.436288	2.72818	24.7668	0.0409674	0.483907	0.0383563	0.439024	0.441752	0.454732	0.190347	7.44297	613.394	0.0830462	20.3058	15191.8	-0.360227	0.435873	1.39387	1.54695	2.12182	1.1285	0.401737	-0.915755	0.422578	0.906327	-0.357828	0.933787	0.660521	1.65172	4.97663	2.34792	87.6521	134.092	0.202404	1.89874	0.316456	0.440388	0.214996	0.912131	3.60521
528	481.328	350.74	5	100	0	0	0	0.503271	0	0.557678	25.0537	23.7861	0.224716	0.465333	0.233237	0.494965	0.499214	0.449483	0.311005	627.688	565.779	0.173441	15725.9	13457.7	-0.253616	1.39887	1.37632	1.74661	2.97746	1.93858	-0.078959	0.996878	0.529217	0.848486	-0.974982	0.222283	0.746778	5.00537	4.8771	12.9862	77.0138	103.518	0.474042	2.36695	0.394491	0.457408	0.129562	1.0088	5.60244
268	464.622	321.992	5	100	0	0	0	0.524618	0	0.49081	53.9922	30.3232	0.174667	0.434904	0.196683	0.461874	0.481792	0.397662	0.240894	2915.16	919.496	0.118233	157396	27882.1	-0.309087	1.73233	1.48178	1.63364	2.64528	1.6809	-0.552303	-0.833643	0.47134	0.881951	-0.887885	0.460066	0.700578	7.34794	5.50665	10.0593	79.9407	111.536	0.417932	2.14758	0.35793	0.416283	0.136555	0.928397	4.61211
1310	418.673	235.942	5	100	0	0	0	0.630414	0	0.648731	16.7437	32.9609	0.426131	0.369476	0.406989	0.457184	0.421854	0.404927	0.420852	280.351	1086.42	0.27302	4694.12	35809.4	-0.187935	1.22385	1.518	1.91311	3.48709	3.42514	-0.860238	-0.509892	0.604176	0.796851	0.999667	0.02582	0.805438	4.09191	5.74116	25.2223	64.7777	73.2367	0.652787	2.48656	0.414427	0.414421	0.028936	1.01719	6.18299
121	463.51	269.808	5	100	0	0	0	0.539497	0	0.521159	30.9862	34.1903	0.438626	0.358161	0.428474	0.458823	0.411117	0.378268	0.271607	960.145	1168.98	0.14155	29751.2	39967.7	-0.28303	1.49117	1.5339	1.68398	2.78731	3.60133	-0.416622	0.90908	0.497886	0.867243	0.359021	-0.933329	0.721913	5.56652	5.84725	26.0162	63.9838	71.4524	0.662288	2.47347	0.412245	0.419795	0.0379727	1.01335	6.11805
1188	440.114	218.829	5	100	0	0	0	0.556729	0	0.302056	5.22406	32.2535	0.405009	0.386063	0.405264	0.48035	0.446696	0.402171	0.0912378	27.2908	1040.29	0.0275589	142.569	33552.9	-0.519913	0.718008	1.50858	1.35264	1.7702	3.0484	-0.871928	0.489635	0.297484	0.954727	0.743021	0.669268	0.549596	2.28562	5.67922	23.8917	66.1083	76.2763	0.636403	2.52555	0.420926	0.405137	0.0353868	1.03408	6.37842
1032	484.003	221.103	5	100	0	0	0	0.431977	0	0.448027	53.089	45.4455	0.485346	0.269689	0.476525	0.397917	0.368459	0.252437	0.200728	2818.44	2065.29	0.0899317	149628	93858.3	-0.348696	1.725	1.65749	1.56522	2.43161	4.16926	0.312739	-0.949839	0.433188	0.901304	0.994217	0.107386	0.669348	7.28622	6.74133	29.0351	60.9649	64.8689	0.696668	2.25037	0.375062	0.383188	0.0991601	0.945089	5.06418
120	443.307	237.081	5	100	0	0	0	0.517738	0	0.569806	33.8925	26.4117	0.386045	0.389807	0.356845	0.453131	0.441931	0.449455	0.324679	1148.7	697.578	0.185004	38932.4	18424.2	-0.244273	1.5301	1.4218	1.76792	3.06721	3.09188	0.617074	-0.786905	0.539469	0.842006	0.957717	0.287713	0.754855	5.82173	5.13923	22.7086	67.2914	79.0307	0.621325	2.47721	0.412869	0.415869	0.0404827	1.01536	6.13659
125	548.995	231.255	5	100	0	0	0	0.621306	0	0.405274	46.1914	22.8872	0.275627	0.453739	0.268091	0.489182	0.49118	0.474771	0.164247	2133.65	523.824	0.066565	98556.1	11988.9	-0.392251	1.66456	1.35959	1.49971	2.23334	2.25298	0.803106	-0.595836	0.394271	0.918994	-0.780866	-0.624698	0.636611	6.79643	4.78406	15.9994	74.0006	95.5758	0.525002	2.45259	0.408765	0.464255	0.106914	1.02941	6.0152
1385	536.917	234.549	5	100	0	0	0	0.765859	0	0.300693	4.72534	65.7271	0.435163	0.230447	0.49925	0.4054	0.378512	0.23169	0.0904163	22.3288	4320.05	0.0271875	105.511	283944	-0.521877	0.674433	1.81774	1.35079	1.76016	3.28117	-0.999916	0.0129507	0.296182	0.955131	0.243862	-0.96981	0.548355	2.17378	8.10723	25.7957	64.2043	71.9459	0.659669	2.18046	0.36341	0.391956	0.11011	0.923593	4.75441
1350	526.776	235.263	5	100	0	0	0	1.15214	1	0.161148	6.86576	21.394	0.0157426	0.497076	0.0161503	0.444421	0.438133	0.410728	0.0259687	47.1387	457.703	0.0041848	323.643	9792.1	-0.792775	0.836689	1.33029	1.17486	1.37013	1.04821	0.550176	0.835049	0.160451	0.987044	0.562287	-0.826942	0.401432	2.62026	4.62536	0.902022	89.098	138.552	0.12547	1.82225	0.303708	0.42443	0.224646	0.897642	3.3206
1365	521.859	236.817	5	100	0	0	0	0.673502	0	0.318673	11.467	79.3754	0.494746	0.260636	0.454726	0.367749	0.350246	0.263474	0.101552	131.492	6300.45	0.032362	1507.82	500101	-0.496655	1.05945	1.89969	1.3753	1.85914	4.11401	-0.890922	0.454157	0.313307	0.949652	-0.741688	-0.670745	0.564511	3.3863	8.90929	29.653	60.347	63.5607	0.703382	2.19158	0.365263	0.358997	0.0962382	0.920223	4.80301
182	141.078	519.774	5	100	0	0	0	0.495137	0	0.568428	48.8542	18.978	0.254835	0.451522	0.239307	0.473556	0.483085	0.488533	0.32311	2386.73	360.164	0.183665	116602	6835.2	-0.245325	1.6889	1.27825	1.76549	3.07646	2.11808	-0.987305	0.158838	0.538308	0.842748	0.128091	0.991762	0.753942	6.98958	4.35637	14.7638	75.2362	98.7941	0.504812	2.39084	0.398473	0.462539	0.118057	1.01112	5.71611
978	161.625	535.853	5	100	0	0	0	3.31053	1	0.618611	2.22755	71.1069	0.336563	0.0779289	0.373118	0.216404	0.480508	0.461633	0.38268	4.96198	5056.19	0.23673	11.0531	359530	-0.208582	0.347827	1.85191	1.85635	2.6335	2.39544	0.791978	-0.610549	0.579904	0.814685	0.912654	-0.408733	0.786518	1.4925	8.43249	19.6676	70.3324	86.3352	0.580141	1.94615	0.324359	0.354841	0.153711	0.865672	3.78752
865	169.808	547.617	5	100	0	0	0	0.421237	0	0.585449	33.635	35.0484	0.382525	0.38722	0.402533	0.489722	0.460627	0.38713	0.342751	1131.31	1228.39	0.200663	38051.7	43053.1	-0.232511	1.52679	1.54467	1.7958	3.16093	3.0727	0.797125	-0.603814	0.552574	0.833464	-0.471403	-0.881918	0.765146	5.79957	5.92017	22.4902	67.5098	79.5447	0.618486	2.50976	0.418293	0.394876	0.0455163	1.02965	6.29888
187	137.447	563.694	5	100	0	0	0	0.441156	0	0.54795	44.9391	32.5501	0.189844	0.415528	0.218065	0.455053	0.479403	0.384451	0.300249	2019.52	1059.51	0.164522	90755.5	34487.1	-0.261259	1.65262	1.51255	1.7297	2.95264	1.75745	0.817354	0.576136	0.520938	0.853594	0.906185	0.422882	0.740236	6.70366	5.70527	10.9437	79.0563	109.081	0.435711	2.14234	0.357057	0.399989	0.123305	0.917039	4.58964
888	126	530.008	5	100	0	0	0	0.938366	1	0.45322	2.72818	83.8037	0.331232	0.0767584	0.379272	0.22126	0.474844	0.458404	0.205408	7.44297	7023.06	0.0930952	20.3058	588558	-0.343691	0.435873	1.92326	1.57337	2.17561	2.41814	0.401737	-0.915755	0.437863	0.899042	0.851742	-0.523961	0.673216	1.65172	9.15444	19.3436	70.6564	87.1326	0.575528	1.94177	0.323628	0.355252	0.152058	0.862566	3.77047
1104	148.571	547.7	5	100	0	0	0	0.590458	0	0.413572	10.2079	11.9011	0.127567	0.434297	0.111606	0.414185	0.443612	0.488884	0.171042	104.201	141.636	0.0707381	1063.68	1685.63	-0.383449	1.00894	1.07559	1.51221	2.2143	1.45356	-0.705495	-0.708714	0.401883	0.915691	-0.617272	0.78675	0.643096	3.19498	3.4498	7.32902	82.671	119.284	0.357165	2.02015	0.336692	0.424241	0.170014	0.908125	4.08101
936	220.55	558.265	5	100	0	0	0	0.505515	0	0.615535	51.0155	8.96065	0.0992512	0.472927	0.0915417	0.445248	0.457255	0.476473	0.378883	2602.58	80.2932	0.233216	132772	719.48	-0.210747	1.7077	0.95234	1.85065	3.37499	1.34168	0.681652	0.731677	0.577395	0.816465	0.447643	-0.894212	0.78456	7.14251	2.99343	5.69605	84.3039	124.043	0.315042	2.0427	0.340449	0.451252	0.190163	0.93608	4.17261
686	238.853	531.258	5	100	0	0	0	0.467784	0	0.675508	28.044	38.8294	0.37666	0.401555	0.385746	0.491455	0.466727	0.410506	0.456311	786.466	1507.72	0.308242	22055.7	58544	-0.17037	1.44784	1.58916	1.96503	3.74057	3.01751	0.228303	-0.97359	0.625294	0.780389	0.904535	0.426399	0.821893	5.29566	6.23132	22.1269	67.8731	80.403	0.613726	2.53265	0.422108	0.40603	0.0463565	1.03913	6.41431
801	195.096	536.508	5	100	0	0	0	0.549274	0	0.663072	24.8549	26.3553	0.397585	0.351234	0.346077	0.404891	0.406538	0.449719	0.439664	617.766	694.602	0.291529	15354.5	18306.4	-0.178439	1.39541	1.42087	1.94075	3.63891	3.17974	-0.27428	0.96165	0.615541	0.788105	0.939976	0.341242	0.814292	4.98547	5.13374	23.4273	66.5727	77.3517	0.630543	2.35604	0.392674	0.401238	0.0387512	0.965746	5.55094
196	189.379	497.578	5	100	0	0	0	0.454051	0	0.527165	68.2964	18.256	0.16024	0.485058	0.157723	0.481183	0.486746	0.470397	0.277903	4664.4	333.282	0.146501	318562	6084.39	-0.278053	1.8344	1.26141	1.69412	2.84697	1.60871	-0.730216	0.683216	0.503085	0.864237	-0.559312	0.828957	0.726061	8.26416	4.2727	9.22083	80.7792	113.888	0.4003	2.24135	0.373558	0.47579	0.166309	0.987708	5.02364
227	234.508	513.919	5	100	0	0	0	0.55474	0	0.568345	17.9591	33.918	0.43525	0.328437	0.380226	0.394877	0.377993	0.415562	0.323016	322.529	1150.43	0.183585	5792.34	39020.3	-0.245388	1.25428	1.53043	1.76534	3.00964	3.52217	-0.777359	0.629058	0.538238	0.842793	0.59681	-0.802383	0.753887	4.23782	5.82392	25.8012	64.1988	71.9335	0.659735	2.33235	0.388724	0.387551	0.0367279	0.955711	5.43983
665	213.103	523.975	5	100	0	0	0	0.690328	0	0.641741	19.0322	26.8981	0.157512	0.482902	0.162161	0.484177	0.489584	0.450094	0.411832	362.225	723.508	0.264289	6893.93	19461	-0.19264	1.27949	1.42972	1.89979	3.4612	1.59353	0.18163	0.983367	0.598591	0.801055	0.981132	-0.193337	0.801087	4.36259	5.18634	9.06251	80.9375	114.334	0.396878	2.22643	0.371072	0.466498	0.164219	0.980309	4.95699
195	185.278	586.327	5	100	0	0	0	0.472307	0	0.67041	46.6188	20.4448	0.265099	0.447878	0.248559	0.47305	0.482045	0.487918	0.44945	2173.31	417.99	0.301315	101317	8545.72	-0.17366	1.66856	1.31058	1.95504	3.75021	2.18307	0.483886	-0.875131	0.621307	0.783567	0.999701	-0.0244453	0.818786	6.8278	4.52159	15.3728	74.6272	97.2011	0.514878	2.40455	0.400758	0.460464	0.112444	1.01334	5.78186
191	159.836	596.077	5	100	0	0	0	0.642662	0	0.53739	24.146	17.6073	0.278472	0.424197	0.251001	0.447852	0.465186	0.493586	0.288788	583.029	310.017	0.155192	14077.8	5458.56	-0.26971	1.38285	1.24569	1.71153	2.8616	2.25506	-0.834233	0.551411	0.511896	0.859048	-0.946514	0.322662	0.733069	4.91386	4.19611	16.169	73.831	95.1381	0.527704	2.36029	0.393382	0.436024	0.102557	0.990499	5.57099
1199	185.805	558.604	5	100	0	0	0	0.746199	0	0.464228	13.4578	14.0591	0.210362	0.441429	0.189437	0.44494	0.466841	0.497309	0.215508	181.112	197.658	0.100045	2437.37	2778.9	-0.333269	1.12897	1.14796	1.59079	2.45345	1.84476	0.777971	0.628301	0.447733	0.894167	0.996954	0.0779877	0.681343	3.66849	3.74955	12.1436	77.8564	105.795	0.458652	2.25032	0.375053	0.443184	0.137287	0.968621	5.06393
147	59.996	411.934	5	100	0	0	0	0.626667	0	0.531127	58.1302	16.7868	0.0792582	0.4961	0.0795345	0.46532	0.465664	0.444137	0.282096	3379.12	281.797	0.149829	196429	4730.46	-0.274802	1.7644	1.22497	1.70085	2.86519	1.2666	0.999942	-0.0107357	0.506505	0.862237	-0.881409	-0.472354	0.728785	7.62432	4.09717	4.54593	85.4541	127.451	0.281528	2.03001	0.338336	0.454728	0.201256	0.943052	4.12096
1363	66	388.412	5	100	0	0	0	0.751741	0	0.618624	2.22755	90.9407	0.236682	0.0271263	0.210414	0.11374	0.490043	0.499747	0.382696	4.96198	8270.21	0.236745	11.0531	752099	-0.208573	0.347827	1.95876	1.85637	2.63354	1.89713	0.791978	-0.610549	0.579915	0.814677	0.164733	-0.986338	0.786527	1.4925	9.53628	13.6908	76.3092	101.632	0.4865	1.57775	0.262959	0.223548	0.194407	0.777081	2.4893
1335	79.875	386.464	5	100	0	0	0	2.43398	1	0.618621	2.22755	90.1829	0.0551023	0.483375	0.0587312	0.448505	0.452209	0.405736	0.382692	4.96198	8132.96	0.236741	11.0531	733454	-0.208575	0.347827	1.95512	1.85637	2.63353	1.17494	0.791978	-0.610549	0.579912	0.814679	0.797589	-0.603202	0.786525	1.4925	9.49647	3.15873	86.8413	131.622	0.234739	1.90366	0.317276	0.427121	0.203186	0.900227	3.62392
1192	67.771	381.689	5	100	0	0	0	0.527952	0	0.502105	16.369	53.4978	0.471228	0.191888	0.46813	0.329059	0.441356	0.344289	0.252109	267.944	2862.01	0.126585	4385.98	153111	-0.299205	1.21402	1.72834	1.6522	2.64937	3.90579	-0.613936	-0.789356	0.481272	0.876571	-0.0906005	-0.995887	0.708594	4.04586	7.31422	28.114	61.886	66.8439	0.68646	2.24595	0.374325	0.392823	0.108552	0.94849	5.04429
1364	69	388.412	5	100	0	0	0	0.598564	0	0.618624	2.22755	59.3002	0.347329	0.353909	0.39747	0.472754	0.458867	0.342399	0.382696	4.96198	3516.51	0.236745	11.0531	208530	-0.208573	0.347827	1.77306	1.85637	2.63354	2.45196	0.791978	-0.610549	0.579915	0.814677	0.380244	-0.924886	0.786527	1.4925	7.70066	20.324	69.676	84.7312	0.589346	2.37273	0.395455	0.37569	0.0580644	0.977325	5.62984
231	430.101	683.469	5	100	0	0	0	0.592814	0	0.689152	27.8221	25.0732	0.366182	0.404821	0.342013	0.46364	0.456099	0.458642	0.47493	774.069	628.665	0.327299	21536.2	15762.7	-0.161685	1.44439	1.39921	1.99203	3.83814	2.91208	0.436976	-0.899473	0.635883	0.771786	-0.0595061	0.998228	0.830152	5.27467	5.00731	21.4803	68.5197	81.9422	0.60513	2.4914	0.415233	0.43046	0.0524846	1.02386	6.20706
1146	426.684	730.584	5	100	0	0	0	0.668457	0	0.649523	21.1909	16.6951	0.106841	0.432504	0.0930364	0.407223	0.436873	0.484003	0.42188	449.054	278.726	0.274021	9515.86	4653.36	-0.187405	1.32615	1.22259	1.91463	3.52688	1.37286	0.717529	-0.696528	0.604807	0.796372	-0.834452	-0.551081	0.80593	4.60336	4.08596	6.13324	83.8668	122.76	0.326865	1.96048	0.326747	0.419864	0.177481	0.893352	3.84348
1111	413.214	735.478	5	100	0	0	0	0.657546	0	0.405723	23.7837	10.0165	0.0989797	0.461574	0.089538	0.433725	0.450558	0.479238	0.164611	565.664	100.33	0.0667865	13453.6	1004.96	-0.39177	1.37628	1.00072	1.50039	2.22073	1.34021	-0.975513	0.219942	0.394683	0.918817	-0.557791	-0.829981	0.636964	4.87685	3.16489	5.68042	84.3196	124.089	0.31461	2.01361	0.335602	0.442142	0.187553	0.922851	4.05464
612	415.792	703.843	5	100	0	0	0	0.638666	0	0.35084	35.9871	39.4595	0.19648	0.42928	0.221389	0.466776	0.48555	0.39802	0.123089	1295.07	1557.05	0.0431844	46605.9	61440.5	-0.454891	1.55615	1.59615	1.42026	2.00352	1.79203	-0.990046	-0.140747	0.343687	0.939084	0.982081	-0.188458	0.592317	5.99892	6.28168	11.3312	78.6688	108.015	0.443261	2.19749	0.366249	0.41365	0.125799	0.94019	4.82898
964	395.508	722.235	5	100	0	0	0	0.517495	0	0.603016	27.145	31.5115	0.440858	0.342324	0.39944	0.420145	0.389552	0.404288	0.363628	736.851	992.975	0.219274	20001.8	31290.1	-0.219671	1.43369	1.49847	1.82762	3.2538	3.6102	0.904128	-0.427262	0.567129	0.823629	0.095428	0.995436	0.776541	5.21009	5.61351	26.1586	63.8414	71.1347	0.663971	2.39661	0.399435	0.401864	0.0332495	0.981231	5.74373
942	417.455	710.85	5	100	0	0	0	0.665835	0	0.204096	9.04834	74.1759	0.26135	0.0412897	0.271331	0.145581	0.491008	0.493556	0.0416552	81.8725	5502.06	0.00850166	740.81	408121	-0.690166	0.956569	1.87026	1.22642	1.49061	2.13708	0.36761	-0.92998	0.202682	0.979245	-0.939895	0.341463	0.45177	3.00805	8.61254	15.1502	74.8498	97.782	0.511224	1.70412	0.284019	0.26634	0.181938	0.805921	2.90401
221	391.089	676.742	5	100	0	0	0	0.673213	0	0.641933	25.8818	32.1852	0.118486	0.435809	0.134996	0.438844	0.462882	0.382248	0.412078	669.868	1035.89	0.264526	17337.4	33340.2	-0.19251	1.41299	1.50766	1.90015	3.50011	1.42269	0.68095	0.73233	0.598745	0.80094	0.695613	0.718416	0.801207	5.08742	5.6732	6.80473	83.1953	120.802	0.344218	1.97326	0.328877	0.409029	0.158863	0.880426	3.89377
469	411.409	685.635	5	100	0	0	0	0.602886	0	0.540024	17.3263	32.2064	0.215488	0.421599	0.243646	0.46919	0.487098	0.395268	0.291626	300.201	1037.25	0.157485	5201.37	33406.2	-0.267587	1.23871	1.50794	1.71605	2.85024	1.88576	-0.99887	0.0475225	0.514157	0.857696	0.710686	0.703509	0.734863	4.16249	5.67507	12.4442	77.5558	104.98	0.464207	2.23229	0.372048	0.408434	0.115469	0.947198	4.98311
574	379.393	685.15	5	100	0	0	0	0.740628	0	0.323057	5.89353	33.4436	0.325119	0.405166	0.353687	0.492768	0.484055	0.397669	0.104366	34.7337	1118.47	0.0337161	204.704	37405.8	-0.490721	0.770375	1.52431	1.38134	1.84511	2.49909	-0.37987	0.92504	0.317467	0.948269	0.897435	-0.441148	0.568381	2.42766	5.78304	18.9728	71.0272	88.0495	0.570192	2.45846	0.409744	0.401417	0.0676545	1.015	6.04405
939	365.25	704.079	5	100	0	0	0	0.970153	1	0.618624	2.22755	87.7699	0.326898	0.053827	0.28619	0.155768	0.499941	0.484998	0.382696	4.96198	7703.56	0.236745	11.0531	676140	-0.208573	0.347827	1.94335	1.85637	2.63354	2.34533	0.791978	-0.610549	0.579915	0.814677	-0.193467	0.981107	0.786527	1.4925	9.36856	19.0806	70.9194	87.7824	0.57175	1.80762	0.30127	0.306544	0.176923	0.837312	3.2675
1315	389.25	741.435	5	100	0	0	0	0.561266	0	0.66217	16.2931	36.4449	0.463406	0.326446	0.430382	0.420734	0.367206	0.363276	0.438469	265.465	1328.23	0.290341	4325.25	48407.2	-0.17903	1.212	1.56164	1.939	3.57019	3.80099	-0.552313	-0.833637	0.61483	0.78866	-0.950304	0.311323	0.813738	4.03647	6.03696	27.6071	62.3929	67.9434	0.680739	2.37145	0.395242	0.39397	0.0511307	0.974868	5.62378
728	381.789	704.874	5	100	0	0	0	0.520073	0	0.61759	23.042	24.9455	0.351154	0.413513	0.328825	0.467636	0.463386	0.465349	0.381417	530.934	622.278	0.23556	12233.8	15523	-0.2093	1.36252	1.39699	1.85445	3.32989	2.7828	-0.867847	-0.496832	0.579072	0.815276	-0.186149	0.982522	0.785869	4.80021	4.99455	20.5579	69.4421	84.1633	0.592582	2.48986	0.414977	0.43845	0.0618893	1.02586	6.19942
257	365.723	581.939	5	100	0	0	0	0.590732	0	0.562479	23.042	27.6674	0.326186	0.385047	0.284218	0.41792	0.43861	0.484851	0.316383	530.934	765.485	0.177959	12233.8	21179	-0.249894	1.36252	1.44197	1.75502	2.99862	2.59558	-0.867847	-0.496832	0.533285	0.845936	0.570352	-0.821401	0.749986	4.80021	5.25998	19.0374	70.9626	87.8893	0.571127	2.33683	0.389472	0.401483	0.0740596	0.968274	5.46078
1357	349.151	572.483	5	100	0	0	0	1.45291	1	0.388232	10.3287	79.2523	0.211555	0.0268551	0.226406	0.116517	0.483565	0.495248	0.150724	106.682	6280.93	0.0585159	1101.89	497778	-0.410909	1.01405	1.89901	1.47437	2.11348	1.85949	-0.785759	-0.618533	0.378553	0.92558	-0.653715	-0.756741	0.623083	3.21383	8.90238	12.2135	77.7865	105.605	0.459951	1.56015	0.260024	0.21898	0.191699	0.767736	2.43406
1330	349.721	567.068	5	100	0	0	0	1.50468	1	0.371053	6.49435	21.4894	0.298449	0.433849	0.278004	0.46897	0.475428	0.483577	0.13768	42.1766	461.794	0.0510867	273.909	9923.68	-0.430564	0.812536	1.33222	1.44926	2.01778	2.32749	0.209599	0.977787	0.362597	0.931946	0.480959	-0.876743	0.609141	2.5484	4.63567	17.3645	72.6355	92.0822	0.546305	2.43828	0.406379	0.45141	0.0933044	1.01705	5.94519
239	317.981	577.762	5	100	0	0	0	0.585648	0	0.655052	44.8282	29.066	0.122244	0.449273	0.136749	0.450387	0.469102	0.395192	0.429093	2009.57	844.832	0.281078	90085.3	24555.9	-0.183724	1.65155	1.46339	1.92524	3.63728	1.43937	0.74857	0.663056	0.6092	0.793016	-0.711525	-0.702661	0.809353	6.69539	5.39129	7.02163	82.9784	120.173	0.349634	2.02295	0.337158	0.422233	0.1628	0.902536	4.09231
250	344.32	593.563	5	100	0	0	0	0.94269	1	0.527139	24.2485	16.3118	0.0133882	0.474768	0.0122961	0.422702	0.425608	0.447318	0.277876	587.99	266.075	0.146479	14257.9	4340.16	-0.278075	1.38468	1.2125	1.69408	2.80624	1.04092	-0.773434	0.633877	0.503063	0.86425	-0.567805	-0.823163	0.726043	4.92428	4.03879	0.76711	89.2329	138.972	0.115707	1.79608	0.299347	0.424155	0.222709	0.886368	3.2259
1391	345.25	575.103	5	100	0	0	0	1.54446	1	0.267687	7.21807	24.0056	0.333393	0.419905	0.310801	0.466947	0.467445	0.47316	0.0716563	52.1005	576.269	0.0191815	376.065	13833.7	-0.572373	0.858421	1.38031	1.30694	1.6757	2.56895	0.804531	0.593911	0.264502	0.964385	-0.903189	0.429244	0.517385	2.68665	4.89955	19.4748	70.5252	86.8091	0.577402	2.47165	0.411942	0.443426	0.0725488	1.022	6.10906
675	66.643	203.779	5	100	0	0	0	0.530914	0	0.42318	54.6766	21.517	0.0749205	0.495204	0.076525	0.464118	0.464494	0.435348	0.179081	2989.53	462.981	0.0757836	163457	9961.97	-0.373475	1.7378	1.33278	1.52681	2.31604	1.25067	-0.95496	-0.296735	0.410662	0.911788	0.456581	-0.889682	0.650523	7.39436	4.63864	4.29665	85.7033	128.196	0.273716	2.01061	0.335102	0.449733	0.201805	0.936688	4.04255
548	31.531	186.042	5	100	0	0	0	0.664416	0	0.383343	17.3263	25.2148	0.110061	0.493317	0.109935	0.473143	0.475961	0.4551	0.146952	300.201	635.786	0.056333	5201.37	16031.2	-0.416412	1.23871	1.40166	1.46718	2.11719	1.38636	-0.99887	0.0475225	0.374023	0.927419	0.0819667	0.996635	0.619147	4.16249	5.02143	6.31883	83.6812	122.217	0.331754	2.11752	0.352919	0.464121	0.188556	0.961811	4.48388
72	65.627	167.648	5	100	0	0	0	0.575839	0	0.57991	24.043	31.3751	0.32784	0.425763	0.340297	0.498757	0.488037	0.42849	0.336296	578.066	984.397	0.195021	13898.4	30885.6	-0.236639	1.38099	1.49659	1.78588	3.10342	2.61271	-0.886507	0.462715	0.547949	0.836512	-0.0408152	0.999167	0.761518	4.90337	5.60135	19.1377	70.8623	87.641	0.572573	2.50918	0.418197	0.427126	0.0717823	1.03687	6.296
70	33.375	173.259	5	100	0	0	0	0.666485	0	0.482653	6.30045	19.0826	0.00550849	0.497304	0.00565608	0.440886	0.433152	0.40651	0.232954	39.6957	364.146	0.112436	250.101	6948.85	-0.316365	0.799372	1.28064	1.62037	2.4513	1.01664	0.0172638	0.999851	0.464131	0.885767	0.23094	0.972968	0.694732	2.51007	4.36836	0.315615	89.6844	140.382	0.0742192	1.78902	0.298169	0.419831	0.228559	0.891417	3.20058
889	51.564	137.515	5	100	0	0	0	0.572071	0	0.634918	40.8925	36.6067	0.271295	0.395975	0.309305	0.473816	0.484502	0.38067	0.403121	1672.2	1340.05	0.255949	68380.3	49054.8	-0.197282	1.61164	1.56356	1.88687	3.49181	2.23136	-0.0517723	-0.998659	0.593111	0.80512	-0.88774	0.460346	0.796817	6.39472	6.05035	15.7413	74.2587	96.2435	0.52086	2.31556	0.385927	0.388323	0.0855354	0.964479	5.36183
1297	29.906	144.139	5	100	0	0	0	0.748139	0	0.472964	7.71645	8.11504	0.0760999	0.474527	0.0701376	0.440113	0.450138	0.469909	0.223695	59.5436	65.8539	0.1058	459.465	534.407	-0.325172	0.887418	0.909291	1.60474	2.43829	1.25106	0.990557	0.137098	0.455527	0.890222	0.966117	-0.258103	0.687724	2.77785	2.84869	4.36442	85.6356	127.993	0.275862	1.98092	0.330154	0.445125	0.199506	0.923593	3.92406
71	48.805	172.954	5	100	0	0	0	0.588992	0	0.442327	27.2817	48.8009	0.132678	0.484793	0.127346	0.469165	0.476149	0.474408	0.195653	744.291	2381.53	0.0865427	20305.5	116221	-0.354257	1.43587	1.68843	1.55632	2.3882	1.48444	0.837468	-0.546486	0.428044	0.903758	-0.994365	0.106014	0.665077	5.22319	6.98576	7.62437	82.3756	118.434	0.36425	2.16454	0.360756	0.471786	0.178813	0.969918	4.68523
993	13.5	201.351	5	100	0	0	0	0.53008	0	0.618624	2.22755	12.3308	0.0476124	0.492778	0.0456636	0.449681	0.449363	0.450794	0.382696	4.96198	152.049	0.236745	11.0531	1874.88	-0.208573	0.347827	1.09099	1.85637	2.63354	1.14949	0.791978	-0.610549	0.579915	0.814677	-0.233398	0.972381	0.786527	1.4925	3.51152	2.72902	87.271	132.928	0.218203	1.93589	0.322649	0.449522	0.214441	0.924412	3.74768
654	0.75	189.454	5	100	0	0	0	0.75612	0	0.178199	6.86576	41.5543	0.404059	0.376879	0.418441	0.483427	0.445484	0.379444	0.0317549	47.1387	1726.76	0.00565869	323.643	71754.3	-0.749095	0.836689	1.61862	1.19506	1.41536	3.10927	0.550176	0.835049	0.177257	0.984165	-0.654556	-0.756013	0.422136	2.62026	6.44626	23.8322	66.1678	76.4137	0.635656	2.50773	0.417956	0.41125	0.0410076	1.02788	6.28873
68	8.452	176.719	5	100	0	0	0	0.635907	0	0.214404	11.3583	67.8306	0.481382	0.186556	0.451345	0.305904	0.437494	0.344851	0.0459691	129.011	4600.99	0.00985595	1465.35	312088	-0.668767	1.05531	1.83143	1.23912	1.52328	3.95927	-0.934933	0.354824	0.212765	0.977103	-0.959279	0.28246	0.463038	3.37021	8.23593	28.7757	61.2243	65.4222	0.693817	2.20753	0.367922	0.391173	0.111306	0.934957	4.8732
475	13.354	189.01	5	100	0	0	0	0.801997	0	0.566198	26.7305	26.6227	0.394571	0.367076	0.351654	0.424832	0.420182	0.449456	0.32058	714.52	708.768	0.181512	19099.5	18869.3	-0.247032	1.42701	1.42525	1.76156	3.03104	3.15725	0.999637	-0.0269592	0.536427	0.843947	0.996734	0.0807495	0.752461	5.17015	5.15972	23.2392	66.7608	77.7894	0.628149	2.40777	0.401295	0.407377	0.0371768	0.986477	5.79736
230	151.749	105.318	5	100	0	0	0	0.553905	0	0.271163	27.7328	11.6499	0.111599	0.457848	0.100605	0.433517	0.452439	0.482991	0.0735294	769.108	135.72	0.0199384	21329.5	1581.13	-0.56677	1.44299	1.06632	1.31149	1.71099	1.39139	0.515451	-0.856919	0.267852	0.96346	-0.793458	0.608624	0.520733	5.26619	3.41319	6.4075	83.5925	121.958	0.334064	2.039	0.339833	0.442978	0.181769	0.926347	4.15752
694	173.529	123.203	5	100	0	0	0	0.77503	0	0.536083	35.3964	37.1264	0.302778	0.382423	0.345013	0.476137	0.478554	0.370519	0.287385	1252.91	1378.37	0.154062	44348.3	51173.9	-0.270768	1.54896	1.56968	1.7093	2.87534	2.44344	-0.743896	-0.668296	0.510772	0.859716	-0.541913	0.840434	0.732177	5.94949	6.09314	17.6245	72.3755	91.424	0.550253	2.35542	0.392571	0.376471	0.0711199	0.974659	5.54802
656	201.391	102.003	5	100	0	0	0	0.808399	0	0.330447	7.55397	48.8626	0.493276	0.253444	0.428803	0.340977	0.313003	0.294559	0.109195	57.0625	2387.55	0.0360832	431.048	116662	-0.480898	0.878175	1.68898	1.39159	1.88362	3.95934	0.955333	0.295531	0.324466	0.945897	-0.985936	0.167126	0.574845	2.74845	6.99018	29.5561	60.4439	63.7649	0.702336	2.12406	0.35401	0.32699	0.0899871	0.890184	4.51164
35	184.064	81.499	5	100	0	0	0	0.666957	0	0.467956	40.6796	40.8749	0.372972	0.332469	0.427413	0.466164	0.437136	0.31658	0.218983	1654.83	1670.76	0.102474	67317.8	68292	-0.329795	1.60938	1.61146	1.59673	2.52254	3.00061	0.160408	-0.987051	0.451063	0.892492	-0.0341888	-0.999415	0.684073	6.37806	6.39335	21.899	68.101	80.9439	0.610714	2.35273	0.392122	0.400193	0.0606395	0.970023	5.53536
1418	207	74.399	5	100	0	0	0	1.0492	1	0.184483	5.22406	71.4086	0.304798	0.0624185	0.347392	0.195629	0.477654	0.472626	0.034034	27.2908	5099.19	0.00627869	142.569	364126	-0.734044	0.718008	1.85375	1.2026	1.42815	2.36438	-0.871928	0.489635	0.183438	0.983031	0.749979	-0.661461	0.429515	2.28562	8.45036	17.746	72.254	91.1173	0.552085	1.86052	0.310086	0.326095	0.161467	0.840998	3.46153
604	204	97.428	5	100	0	0	0	0.662786	0	0.618624	2.22755	16.3322	0.220216	0.461282	0.206953	0.472095	0.483454	0.489885	0.382696	4.96198	266.741	0.236745	11.0531	4356.46	-0.208573	0.347827	1.21304	1.85637	2.63354	1.81108	0.791978	-0.610549	0.579915	0.814677	-0.584478	-0.811409	0.786527	1.4925	4.04131	12.7217	77.2783	104.23	0.469272	2.33388	0.388981	0.466689	0.136278	1.00035	5.44702
36	187.393	93.123	5	100	0	0	0	0.711918	0	0.171921	9.31849	62.6318	0.396641	0.127573	0.452064	0.294293	0.457877	0.398523	0.0295568	86.8343	3922.74	0.00508144	809.164	245688	-0.764671	0.969346	1.79679	1.18758	1.4016	3.10947	0.106088	-0.994357	0.171075	0.985258	-0.198721	0.980056	0.414634	3.05262	7.91403	23.3684	66.6316	77.4887	0.629794	2.12697	0.354495	0.397582	0.12573	0.912711	4.52401
412	217.809	934.696	5	100	0	0	0	0.777784	0	0.167029	9.18441	86.5912	0.224966	0.0284609	0.222273	0.117392	0.487818	0.498255	0.0278987	84.3534	7498.04	0.00465989	774.736	649264	-0.777208	0.963051	1.93747	1.18179	1.38832	1.92918	0.23806	-0.97125	0.166253	0.986083	-0.980579	0.196122	0.408692	3.03058	9.30544	13.0009	76.9991	103.478	0.474306	1.57916	0.263194	0.223619	0.19246	0.775132	2.49376
725	220.481	943.268	5	100	0	0	0	1.07079	1	0.338718	9.83658	78.4199	0.252738	0.0378965	0.258917	0.138144	0.490769	0.495047	0.11473	96.7583	6149.68	0.0388611	951.771	482257	-0.470162	0.992844	1.89443	1.40315	1.92492	2.08946	-0.400261	-0.916401	0.332278	0.943181	0.119629	-0.992819	0.581995	3.13633	8.8555	14.6396	75.3604	99.1206	0.502731	1.67351	0.278919	0.255827	0.184709	0.798348	2.80064
496	200.314	943.092	5	100	0	0	0	1.00137	1	0.454373	17.9591	58.117	0.436058	0.157253	0.460097	0.308492	0.459995	0.379665	0.206455	322.529	3377.59	0.0938075	5792.34	196295	-0.342587	1.25428	1.7643	1.57519	2.42619	3.5533	-0.777359	0.629058	0.438899	0.898536	0.999997	0.00246409	0.674072	4.23782	7.62345	25.8526	64.1474	71.8183	0.660347	2.20156	0.366927	0.407861	0.118035	0.936735	4.84687
407	203.03	896.012	5	100	0	0	0	0.504752	0	0.599178	56.7917	40.9498	0.262292	0.436321	0.283518	0.492649	0.496666	0.421137	0.359014	3225.3	1676.89	0.215113	183170	68668.2	-0.222444	1.75428	1.61225	1.82062	3.27345	2.17776	0.240647	0.970613	0.563964	0.825799	-0.108879	-0.994055	0.774066	7.53603	6.3992	15.2061	74.7939	97.6359	0.512145	2.39258	0.398764	0.428729	0.102192	1.00314	5.72445
408	214.043	935.019	5	100	0	0	0	0.886163	0	0.502465	24.5536	36.9103	0.0203323	0.499338	0.0204834	0.447788	0.441254	0.421419	0.252471	602.879	1362.37	0.126858	14802.9	50285.5	-0.298894	1.39012	1.56715	1.65279	2.67722	1.06281	-0.547305	0.836933	0.481587	0.876398	-0.709516	0.704689	0.708848	4.95516	6.07538	1.16504	88.835	137.735	0.142591	1.85061	0.308436	0.431337	0.224584	0.907185	3.42477
1025	628.24	540.002	5	100	0	0	0	0.664028	0	0.467939	11.0258	14.1763	0.0377237	0.490116	0.0358367	0.443977	0.443693	0.449798	0.218967	121.568	200.967	0.102463	1340.39	2848.98	-0.329811	1.04241	1.15156	1.5967	2.45414	1.11906	-0.999543	0.0302211	0.451048	0.8925	0.999234	-0.0391231	0.684061	3.32051	3.76514	2.16192	87.8381	134.661	0.194226	1.90114	0.316857	0.443835	0.217636	0.916089	3.61435
946	618.164	547.497	5	100	0	0	0	0.563456	0	0.443522	25.251	47.1687	0.465292	0.269522	0.490731	0.418774	0.37114	0.234975	0.196712	637.613	2224.89	0.087246	16100.4	104945	-0.353085	1.40228	1.67365	1.55819	2.39105	3.88635	0.117983	0.993016	0.429123	0.903246	-0.0447952	-0.998996	0.665974	5.02504	6.86795	27.7291	62.2709	67.678	0.682123	2.25043	0.375072	0.394957	0.104125	0.947779	5.06445
316	641.355	579.377	5	100	0	0	0	0.47848	0	0.682634	26.025	22.2436	0.103555	0.481691	0.109899	0.465912	0.472577	0.423473	0.465989	677.301	494.778	0.3181	17626.7	11005.6	-0.165812	1.41539	1.34721	1.97908	3.78245	1.36071	0.778491	0.627655	0.630839	0.775914	-0.249778	-0.968303	0.826217	5.10147	4.71631	5.94392	84.0561	123.315	0.3218	2.05711	0.342851	0.444692	0.183999	0.935179	4.23169
1415	620.5	574.608	5	100	0	0	0	0.967015	1	0.314315	5.45635	85.8732	0.397452	0.117655	0.424167	0.262443	0.477466	0.424141	0.0987939	29.7718	7374.21	0.0310524	162.445	633247	-0.502635	0.736902	1.93386	1.36932	1.81193	3.02414	-0.735792	0.677208	0.309165	0.951008	-0.867522	-0.497399	0.560638	2.33588	9.26678	23.419	66.581	77.371	0.630438	2.10332	0.350554	0.410797	0.135015	0.910206	4.42397
1435	613.232	578.258	5	100	0	0	0	0.792223	0	0.401972	8.33472	87.2247	0.396318	0.0896158	0.35383	0.195629	0.493256	0.450182	0.161581	69.4676	7608.15	0.0649512	578.993	663618	-0.395804	0.920891	1.94064	1.49477	2.1532	3.09592	0.886654	-0.462434	0.391234	0.920291	-0.67421	0.73854	0.634013	2.88699	9.33942	23.3482	66.6518	77.5356	0.629538	1.97883	0.329805	0.375074	0.156142	0.880074	3.91577
1313	623.779	569.362	5	100	0	0	0	0.730817	0	0.572103	19.0322	23.6336	0.234328	0.444423	0.214098	0.456401	0.473529	0.495443	0.327302	362.225	558.547	0.18725	6893.93	13200.5	-0.242526	1.27949	1.37353	1.77199	3.03683	1.98913	0.18163	0.983367	0.541401	0.840764	-0.997434	0.0715938	0.756375	4.36259	4.86144	13.552	76.448	102.002	0.484074	2.31822	0.38637	0.450412	0.126935	0.988056	5.37415
1228	525.867	824.716	5	100	0	0	0	0.716776	0	0.576834	37.274	24.2731	0.127747	0.476698	0.135405	0.470906	0.479207	0.428245	0.332737	1389.35	589.183	0.191934	51786.7	14301.3	-0.238949	1.57141	1.38513	1.78039	3.11456	1.4622	-0.412423	0.910993	0.545373	0.838193	-0.757608	0.652709	0.759496	6.10524	4.92677	7.33942	82.6606	119.254	0.357417	2.11821	0.353035	0.449576	0.172557	0.946932	4.48681
339	545.38	839.623	5	100	0	0	0	0.66774	0	0.523252	22.3865	27.4369	0.235993	0.452203	0.251422	0.492888	0.498122	0.433303	0.273793	501.155	752.783	0.143263	11219.1	20654	-0.281289	1.34999	1.43834	1.68751	2.78042	2.00307	-0.385133	-0.922861	0.4997	0.866199	0.742928	-0.669371	0.723362	4.73144	5.23802	13.6502	76.3498	101.74	0.485791	2.36393	0.393989	0.442753	0.119035	1.0011	5.58817
872	488.125	869.85	5	100	0	0	0	0.764796	0	0.474452	6.68264	26.0972	0.255706	0.460971	0.258875	0.497426	0.498789	0.460342	0.225105	44.6577	681.064	0.106801	298.431	17773.9	-0.323808	0.824948	1.41659	1.60713	2.42541	2.07911	0.388916	0.921273	0.456851	0.889543	0.821741	0.569862	0.688805	2.58508	5.10854	14.8154	75.1846	98.6586	0.505674	2.43211	0.405351	0.460657	0.115909	1.02617	5.91515
1130	621.473	736.678	5	100	0	0	0	0.827858	0	0.544908	35.8144	18.411	0.263364	0.450433	0.248435	0.47602	0.483994	0.486398	0.296925	1282.67	338.965	0.161797	45938.1	6240.68	-0.263677	1.55406	1.26508	1.72445	2.92555	2.167	-0.951132	-0.308785	0.518339	0.855175	-0.424632	0.905366	0.738179	5.98451	4.2908	15.2698	74.7302	97.4698	0.51319	2.40864	0.401441	0.463226	0.113553	1.01558	5.80157
293	594.828	744.285	5	100	0	0	0	0.579035	0	0.58487	31.7376	22.0271	0.0329107	0.485179	0.0350483	0.441242	0.442026	0.398372	0.342073	1007.28	485.193	0.200068	31968.5	10687.4	-0.232941	1.50157	1.34296	1.79476	3.15369	1.1035	0.316155	0.948708	0.552091	0.833784	-0.0359437	-0.999354	0.764768	5.63361	4.6933	1.88598	88.114	135.509	0.181413	1.83478	0.305796	0.419807	0.212332	0.886844	3.36641
259	565.432	676.117	5	100	0	0	0	0.579549	0	0.360385	15.6722	31.7154	0.170732	0.418761	0.196363	0.449217	0.475198	0.382691	0.129877	245.618	1005.87	0.0468058	3849.37	31901.5	-0.443233	1.19513	1.50127	1.43388	2.02297	1.65532	0.0357556	-0.999361	0.352635	0.935761	0.295017	0.955492	0.600321	3.95881	5.63164	9.83038	80.1696	112.175	0.413197	2.09296	0.348827	0.400726	0.131946	0.903952	4.38049
261	579.327	673.147	5	100	0	0	0	0.53089	0	0.681742	22.3865	12.3185	0.0696464	0.473265	0.0639986	0.437034	0.447026	0.468252	0.464772	501.155	151.745	0.316855	11219.1	1869.28	-0.16638	1.34999	1.09056	1.97732	3.75538	1.23013	-0.385133	-0.922861	0.630147	0.776476	-0.24534	0.969437	0.825677	4.73144	3.50977	3.99368	86.0063	129.104	0.263906	1.95922	0.326537	0.44203	0.201623	0.91816	3.83855
1250	597.358	648.395	5	100	0	0	0	0.446845	0	0.635784	12.8928	29.3726	0.230808	0.438561	0.253093	0.484649	0.494727	0.415558	0.404221	166.224	862.75	0.256997	2143.1	25341.2	-0.19669	1.11035	1.46794	1.8885	3.35956	1.9641	0.320663	0.947193	0.593809	0.804606	-0.89042	-0.455141	0.797361	3.59065	5.41965	13.3446	76.6554	102.556	0.480425	2.3174	0.386233	0.427059	0.115705	0.980812	5.37032
489	562.144	621.546	5	100	0	0	0	0.53019	0	0.514074	53.206	29.5187	0.123085	0.445256	0.138224	0.447647	0.466683	0.391028	0.264272	2830.88	871.354	0.135855	150620	25721.2	-0.288974	1.72596	1.4701	1.67209	2.76851	1.44322	0.199723	-0.979852	0.491729	0.870748	-0.947193	-0.320664	0.71699	7.29424	5.43311	7.07018	82.9298	120.032	0.350835	2.01192	0.33532	0.418142	0.160595	0.896433	4.04783
754	594.923	617.783	5	100	0	0	0	0.774432	0	0.375383	17.9591	29.4312	0.0437274	0.481091	0.0469949	0.442278	0.44572	0.39783	0.140912	322.529	866.196	0.0528961	5792.34	25493.2	-0.425525	1.25428	1.46881	1.45555	2.08631	1.13959	-0.777359	0.629058	0.366629	0.930367	-0.915547	-0.402211	0.612685	4.23782	5.42505	2.50619	87.4938	133.608	0.209111	1.85764	0.309607	0.420054	0.206386	0.887758	3.45083
1107	566.873	648.465	5	100	0	0	0	0.557128	0	0.447448	38.0314	26.2441	0.0670832	0.463138	0.0741719	0.437589	0.450047	0.388166	0.20021	1446.39	688.753	0.0895834	55008.1	18075.7	-0.349257	1.58014	1.41903	1.56431	2.42175	1.22187	0.326207	0.945298	0.432666	0.901554	0.896302	0.443444	0.668916	6.16696	5.1229	3.84647	86.1535	129.546	0.259004	1.8802	0.313366	0.412878	0.189741	0.877039	3.53513
1286	612.75	646.921	5	100	0	0	0	0.82151	0	0.618624	2.22755	55.8135	0.219781	0.404017	0.2535	0.459681	0.481994	0.380565	0.382696	4.96198	3115.15	0.236745	11.0531	173867	-0.208573	0.347827	1.74674	1.85637	2.63354	1.81846	0.791978	-0.610549	0.579915	0.814677	-0.670712	0.741718	0.786527	1.4925	7.47084	12.6962	77.3038	104.299	0.468808	2.19954	0.36659	0.392291	0.107631	0.929651	4.83797
263	608.912	667.401	5	100	0	0	0	0.540921	0	0.725801	40.7096	26.1898	0.376101	0.399187	0.351114	0.461416	0.451098	0.45321	0.526787	1657.27	685.906	0.382343	67466.9	17963.7	-0.139182	1.6097	1.41813	2.06639	4.16275	3.01105	0.130729	-0.991418	0.663735	0.747968	0.870914	0.491436	0.85194	6.38041	5.1176	22.0924	67.9076	80.4849	0.613271	2.49213	0.415354	0.425142	0.0463926	1.02268	6.21069
601	487.875	622.145	5	100	0	0	0	0.49492	0	0.719384	42.2944	10.3903	0.138888	0.467694	0.127987	0.451677	0.466497	0.485704	0.517513	1788.82	107.958	0.372291	75656.9	1121.72	-0.143039	1.62628	1.01663	2.05317	4.11527	1.50658	-0.993152	-0.116833	0.658921	0.752212	-0.822346	-0.568988	0.848165	6.50341	3.2234	7.9835	82.0165	117.403	0.372677	2.13845	0.356408	0.459087	0.173083	0.95496	4.57296
1080	515.683	639.22	5	100	0	0	0	0.515032	0	0.538551	21.9387	25.7676	0.171031	0.46461	0.183972	0.479445	0.489826	0.427211	0.290037	481.307	663.969	0.1562	10559.2	17108.9	-0.268773	1.34121	1.41107	1.71352	2.86135	1.6583	0.0524245	-0.998625	0.512893	0.858453	0.593064	0.805155	0.73386	4.68388	5.07618	9.84777	80.1522	112.127	0.413559	2.2161	0.369349	0.44591	0.150169	0.965021	4.91108
241	467.727	651.668	5	100	0	0	0	0.617749	0	0.3721	44.6897	24.4487	0.308408	0.440038	0.29866	0.486576	0.48497	0.469331	0.138458	1997.17	597.739	0.0515204	89252.9	14613.9	-0.42934	1.65021	1.38826	1.45078	2.09186	2.47815	0.649862	0.760052	0.363573	0.931566	-0.63193	0.775025	0.61	6.68504	4.94456	17.9633	72.0367	90.5701	0.555345	2.48798	0.414664	0.454684	0.0877426	1.03449	6.19006
592	48.298	872.011	5	100	0	0	0	0.478052	0	0.510492	28.8292	22.8239	0.145176	0.484808	0.149675	0.48149	0.486764	0.447555	0.260602	831.123	520.93	0.133035	23960.6	11889.7	-0.292011	1.45983	1.35839	1.66611	2.72705	1.53821	-0.52683	-0.849971	0.488607	0.872504	-0.739785	-0.672843	0.714487	5.36928	4.77744	8.34747	81.6525	116.363	0.38102	2.19547	0.365911	0.464522	0.169852	0.973445	4.82008
246	37.05	841.933	5	100	0	0	0	0.903115	1	0.484613	7.87556	80.9025	0.212731	0.0262271	0.218208	0.113505	0.484957	0.497172	0.23485	62.0244	6545.21	0.113811	488.477	529524	-0.314605	0.896281	1.90796	1.62355	2.49189	1.8586	0.999767	-0.0215767	0.465866	0.884855	-0.702503	0.71168	0.696142	2.80634	8.99458	12.2824	77.7176	105.418	0.461228	1.5528	0.2588	0.21547	0.193359	0.767335	2.41119
622	29.243	880.508	5	100	0	0	0	0.623118	0	0.494509	39.3776	20.8634	0.0193717	0.483018	0.0180701	0.431872	0.43215	0.446812	0.244539	1550.6	435.281	0.120927	61058.7	9081.45	-0.305826	1.59525	1.31939	1.63969	2.65582	1.05975	0.994207	-0.107484	0.4746	0.880202	0.903449	-0.428695	0.703213	6.27516	4.56765	1.10999	88.89	137.906	0.139182	1.83129	0.305216	0.432011	0.2227	0.898285	3.35364
1482	31.875	841.127	5	100	0	0	0	0.706652	0	0.618601	2.22755	44.7999	0.314281	0.377574	0.357839	0.476897	0.475714	0.366409	0.382667	4.96198	2007.03	0.236718	11.0531	89914.8	-0.208589	0.347827	1.65128	1.85633	2.63346	2.27327	0.791978	-0.610549	0.579896	0.814691	0.729508	0.683972	0.786512	1.4925	6.69327	18.3174	71.6826	89.6819	0.560608	2.36871	0.394786	0.371992	0.0666921	0.978455	5.61081
937	11.75	871.655	5	100	0	0	0	1.01575	1	0.436283	2.72818	38.3005	0.128177	0.433051	0.111976	0.4131	0.443077	0.48907	0.190343	7.44297	1466.93	0.0830434	20.3058	56184.1	-0.360232	0.435873	1.5832	1.54695	2.1218	1.44211	0.401737	-0.915755	0.422574	0.906329	0.565788	0.824551	0.660517	1.65172	6.18874	7.36426	82.6357	119.183	0.358018	2.01845	0.336409	0.423076	0.169491	0.907006	4.07414
591	4.749	875.008	5	100	0	0	0	0.520944	0	0.253742	22.7166	27.5501	0.112794	0.452908	0.125765	0.449091	0.466684	0.395374	0.064385	516.044	759.008	0.0163372	11722.8	20910.7	-0.595608	1.35634	1.44012	1.28884	1.65182	1.39842	-0.663473	-0.7482	0.251028	0.96798	0.662562	-0.749007	0.503728	4.76619	5.24882	6.4764	83.5236	121.758	0.335848	2.00262	0.333769	0.422233	0.167959	0.899701	4.01047
862	1.79	792.665	5	100	0	0	0	0.535599	0	0.271115	8.76986	30.4781	0.243187	0.465955	0.240615	0.492837	0.49623	0.471927	0.0735033	76.9104	928.915	0.0199279	674.494	28311.6	-0.566846	0.942993	1.48399	1.31143	1.6921	2.02265	0.609094	-0.793098	0.267806	0.963473	-0.806274	0.591542	0.520687	2.96139	5.5207	14.0747	75.9253	100.612	0.49314	2.41075	0.401792	0.468941	0.1244	1.02274	5.81172
1327	353.25	897.635	5	100	0	0	0	1.17795	1	0.453206	2.72818	50.1955	0.222468	0.451411	0.204769	0.460546	0.476341	0.49438	0.205396	7.44297	2519.59	0.0930866	20.3058	126472	-0.343704	0.435873	1.70066	1.57335	2.17557	1.84885	0.401737	-0.915755	0.43785	0.899048	-0.0699253	0.997552	0.673206	1.65172	7.08488	12.854	77.146	103.873	0.471665	2.30992	0.384986	0.455979	0.13366	0.989247	5.33571
1165	353.036	886.686	5	100	0	0	0	0.906503	1	0.246849	5.89353	21.6657	0.280364	0.42158	0.251868	0.445358	0.463476	0.493754	0.0609344	34.7337	469.403	0.0150416	204.704	10169.9	-0.607569	0.770375	1.33577	1.27999	1.60617	2.21024	-0.37987	0.92504	0.24435	0.969687	0.319734	-0.947507	0.496839	2.42766	4.65464	16.2819	73.7181	94.8474	0.529494	2.3564	0.392733	0.433469	0.101273	0.98829	5.55262
1486	332.25	917.121	5	100	0	0	0	0.275398	0	0.618624	2.22755	85.9619	0.479952	0.278819	0.416888	0.35993	0.30804	0.341376	0.382696	4.96198	7389.45	0.236745	11.0531	635211	-0.208573	0.347827	1.93431	1.85637	2.63354	3.25177	0.791978	-0.610549	0.579915	0.814677	-0.908173	-0.418595	0.786527	1.4925	9.27156	28.6823	61.3177	65.622	0.692786	2.185	0.364167	0.350653	0.0736988	0.907119	4.77425
741	137.563	978.03	5	100	0	0	0	0.476238	0	0.400081	71.9743	14.0077	0.0933001	0.493356	0.0911816	0.465783	0.468231	0.458711	0.160065	5180.3	196.216	0.0640389	372848	2748.53	-0.397852	1.85718	1.14637	1.49195	2.21608	1.32008	0.278595	-0.960409	0.389493	0.921029	0.991631	0.129106	0.63252	8.48377	3.74269	5.35349	84.6465	125.053	0.305451	2.07056	0.345094	0.462247	0.196209	0.952381	4.28723
405	174.925	945.453	5	100	0	0	0	0.657669	0	0.489075	37.1406	5.22023	0.0483451	0.460164	0.0434724	0.41877	0.432249	0.463859	0.239194	1379.42	27.2508	0.116984	51232.6	142.255	-0.310625	1.56985	0.71769	1.63081	2.62593	1.15433	-0.529925	0.848045	0.46981	0.882768	-0.873796	0.486292	0.699339	6.09431	2.28478	2.77105	87.2289	132.8	0.219875	1.86686	0.311143	0.425509	0.20615	0.890702	3.48516
791	191.654	951.571	5	100	0	0	0	0.730582	0	0.678601	15.9078	35.4326	0.122619	0.446378	0.108908	0.424976	0.449028	0.486867	0.460499	253.058	1255.47	0.312495	4025.6	44484.5	-0.168386	1.20161	1.5494	1.97112	3.67545	1.43878	-0.198509	-0.980099	0.627705	0.778452	-0.767595	-0.640935	0.823772	3.98846	5.95253	7.04328	82.9567	120.11	0.35017	2.03878	0.339796	0.435677	0.174729	0.919467	4.15661
683	502.836	964.297	5	100	0	0	0	0.560687	0	0.445352	46.8048	29.6329	0.428377	0.332289	0.373624	0.39613	0.383176	0.422385	0.198338	2190.69	878.109	0.0883304	102535	26020.9	-0.351297	1.67029	1.47177	1.56104	2.41647	3.50956	0.313702	-0.949521	0.430776	0.902459	-0.977564	-0.210641	0.667347	6.8414	5.44361	25.3646	64.6354	72.9152	0.654505	2.33598	0.38933	0.389653	0.0352187	0.956906	5.45681
684	492.75	937.905	5	100	0	0	0	0.593638	0	0.618624	2.22755	43.2787	0.375196	0.407142	0.375978	0.489118	0.467114	0.424606	0.382696	4.96198	1873.05	0.236745	11.0531	81063	-0.208573	0.347827	1.63627	1.85637	2.63354	2.60188	0.791978	-0.610549	0.579915	0.814677	-0.646965	0.76252	0.786527	1.4925	6.57865	22.0364	67.9636	80.6176	0.612532	2.53915	0.423192	0.415874	0.0470484	1.04193	6.4473
1070	484.208	976.839	5	100	0	0	0	0.457081	0	0.536144	36.7376	35.9013	0.459268	0.319259	0.411011	0.400559	0.360832	0.380638	0.28745	1349.65	1288.9	0.154115	49582.9	46273.3	-0.270719	1.56511	1.55511	1.7094	2.87733	3.83364	-0.820058	0.572281	0.510825	0.859685	-0.974342	-0.225071	0.732219	6.06116	5.99177	27.3399	62.6601	68.5267	0.677693	2.33157	0.388595	0.390598	0.0475013	0.957766	5.4362
1211	468.375	969.732	5	100	0	0	0	0.373253	0	0.618611	2.22755	11.9896	0.059737	0.492193	0.0573093	0.452949	0.454038	0.454995	0.38268	4.96198	143.751	0.23673	11.0531	1723.51	-0.208582	0.347827	1.0788	1.85635	2.6335	1.18968	0.791978	-0.610549	0.579904	0.814685	-0.54532	0.838228	0.786518	1.4925	3.4626	3.42472	86.5753	130.817	0.244412	1.97122	0.328537	0.453493	0.209677	0.931365	3.88571
1069	436.055	980.058	5	100	0	0	0	0.543502	0	0.547466	53.6689	51.5118	0.434805	0.3272	0.463462	0.461799	0.396802	0.309546	0.299719	2880.35	2653.47	0.164086	154585	136685	-0.261643	1.72972	1.71191	1.72887	2.95611	3.60812	-0.258844	-0.965919	0.520525	0.853846	0.947817	0.318815	0.739909	7.32591	7.17717	25.7729	64.2271	71.997	0.659397	2.39361	0.398936	0.415803	0.0671463	0.988656	5.72939
1434	472.419	996.511	5	100	0	0	0	0.741815	0	0.114187	19.7361	29.6108	0.0279078	0.469204	0.0307216	0.425972	0.432739	0.378168	0.0130387	389.514	876.799	0.00148885	7687.48	25962.7	-0.942383	1.29526	1.47145	1.12096	1.25491	1.08711	0.774892	0.632094	0.113939	0.993488	-0.97267	-0.232192	0.337916	4.44253	5.44158	1.59921	88.4008	136.392	0.167056	1.76471	0.294119	0.40207	0.207155	0.856505	3.11421
1279	392.81	988.376	5	100	0	0	0	0.561475	0	0.924942	24.604	37.7154	0.352288	0.363251	0.397212	0.478455	0.461688	0.352351	0.855518	605.357	1422.45	0.791304	14894.2	53648.3	-0.0338855	1.39101	1.57652	2.52172	5.94684	2.8079	-0.504447	0.863443	0.798586	0.601881	0.0162874	0.999867	0.961739	4.96024	6.14129	20.6273	69.3727	83.9952	0.593539	2.40524	0.400874	0.380232	0.0563225	0.989981	5.7852
1196	338.508	897.609	5	100	0	0	0	0.507815	0	0.638673	26.8695	34.4422	0.462764	0.303497	0.404367	0.379592	0.343585	0.377086	0.407903	721.97	1186.27	0.260517	19399	40857.6	-0.194721	1.42926	1.53709	1.89397	3.48229	3.84585	0.98626	-0.165202	0.596131	0.802888	0.115064	-0.993358	0.79917	5.18358	5.86875	27.5656	62.4344	68.0339	0.680268	2.27089	0.378482	0.378339	0.0540689	0.934938	5.15695
300	223.627	845.506	5	100	0	0	0	0.534245	0	0.533774	44.0469	20.0367	0.0590858	0.492542	0.0614584	0.456942	0.457241	0.421199	0.284915	1940.13	401.469	0.15208	85456.7	8044.12	-0.272643	1.64392	1.30183	1.70536	2.8713	1.19303	0.0645579	0.997914	0.508786	0.860893	0.927304	0.37431	0.730598	6.63678	4.47624	3.38734	86.6127	130.93	0.243076	1.94847	0.324745	0.439071	0.2061	0.919315	3.79653
415	194.397	856.259	5	100	0	0	0	0.705695	0	0.423688	17.8203	27.3672	0.0677234	0.460094	0.0752274	0.435462	0.449412	0.385726	0.179512	317.563	748.964	0.0760569	5659.07	20497	-0.372954	1.25092	1.43723	1.52758	2.28804	1.22373	-0.856916	0.515457	0.411125	0.911579	0.787741	-0.616006	0.650913	4.22141	5.23137	3.88324	86.1168	129.435	0.260237	1.87364	0.312274	0.410594	0.188268	0.873106	3.51054
197	207.911	762.68	5	100	0	0	0	0.591476	0	0.513069	18.3012	29.0531	0.123333	0.440571	0.139569	0.444492	0.466522	0.387817	0.26324	334.934	844.083	0.13506	6129.69	24523.2	-0.289824	1.26248	1.46319	1.67041	2.71327	1.44193	-0.521285	0.853383	0.490853	0.871242	-0.702402	-0.711781	0.716288	4.27799	5.39009	7.0845	82.9155	119.991	0.351188	2.0023	0.333717	0.414194	0.158876	0.891298	4.00922
1073	298.49	808.482	5	100	0	0	0	0.737077	0	0.465205	13.4578	21.7791	0.219862	0.446544	0.200332	0.453862	0.472265	0.496052	0.216416	181.112	474.329	0.100678	2437.37	10330.5	-0.332356	1.12897	1.33804	1.59234	2.45794	1.90142	0.777971	0.628301	0.448606	0.89373	0.210463	-0.977602	0.682059	3.66849	4.66681	12.7009	77.2991	104.286	0.468894	2.28892	0.381486	0.450203	0.133997	0.981308	5.23914
720	307.043	794.892	5	100	0	0	0	0.570357	0	0.382563	34.7952	13.0586	0.218568	0.417328	0.19076	0.42089	0.452491	0.49973	0.146354	1210.71	170.527	0.0559898	42126.8	2226.84	-0.417297	1.54152	1.1159	1.46604	2.13146	1.89828	-0.235449	-0.971887	0.373299	0.927711	0.472592	0.881281	0.618517	5.89875	3.61367	12.6249	77.3751	104.491	0.467513	2.19977	0.366628	0.419109	0.129193	0.943372	4.83897
1236	305.234	815.932	5	100	0	0	0	0.503589	0	0.490281	10.9127	23.6631	0.20731	0.467789	0.216799	0.491929	0.497731	0.445606	0.240375	119.087	559.942	0.117852	1299.56	13250	-0.309555	1.03793	1.37407	1.63277	2.55589	1.8315	-0.996568	-0.0827795	0.470874	0.882201	-0.994888	0.100983	0.700201	3.30344	4.86447	11.9648	78.0352	106.282	0.455313	2.32716	0.387861	0.456697	0.137467	0.998549	5.41569
1457	823.138	405.671	5	100	0	0	0	0.718255	0	0.670402	16.6694	14.5031	0.0362106	0.496967	0.0353307	0.450323	0.446833	0.441047	0.449439	277.869	210.34	0.301305	4631.91	3050.58	-0.173665	1.22192	1.16146	1.95502	3.62903	1.11419	-0.820015	-0.572342	0.621301	0.783572	0.93379	-0.357821	0.818781	4.08282	3.80829	2.07517	87.9248	134.927	0.190291	1.90671	0.317785	0.44394	0.219355	0.920059	3.63555
385	831.493	431.19	5	100	0	0	0	0.625513	0	0.492752	36.1934	39.3692	0.302793	0.406632	0.334228	0.48871	0.487092	0.3955	0.242805	1309.96	1549.93	0.119642	47412	61019.7	-0.307372	1.55863	1.59516	1.63681	2.64393	2.44495	-0.997883	0.0650385	0.473052	0.881034	0.995075	-0.0991288	0.701963	6.0161	6.27449	17.6254	72.3746	91.4217	0.550266	2.41495	0.402492	0.401066	0.0764939	1.00063	5.83201
838	832.229	457.815	5	100	0	0	0	0.58999	0	0.580261	31.6593	18.2779	0.149012	0.4861	0.145771	0.477646	0.483376	0.471065	0.336703	1002.31	334.082	0.195376	31732.5	6106.31	-0.236377	1.5005	1.26193	1.7865	3.12563	1.55482	0.240978	0.970531	0.548242	0.83632	-0.541025	0.841006	0.761749	5.62666	4.27527	8.56967	81.4303	115.731	0.386021	2.21297	0.368828	0.474356	0.171605	0.981553	4.89724
1129	801.759	479.494	5	100	0	0	0	0.548021	0	0.668882	40.1888	41.3171	0.430761	0.321307	0.466427	0.460917	0.396002	0.299928	0.447403	1615.14	1707.1	0.29926	64910.5	70532.5	-0.17465	1.60411	1.61613	1.95205	3.72797	3.54495	0.606701	-0.79493	0.620109	0.784515	-0.458579	-0.888654	0.817852	6.33946	6.42784	25.5159	64.4841	72.5743	0.656324	2.37534	0.39589	0.413382	0.0709807	0.982632	5.64225
724	783.775	797.755	5	100	0	0	0	0.631857	0	0.551833	35.5711	21.5708	0.102411	0.484923	0.107759	0.467559	0.472942	0.428101	0.30452	1265.3	465.299	0.168044	45008.2	10036.9	-0.258192	1.5511	1.33387	1.73643	2.96479	1.3565	-0.848731	-0.528825	0.524249	0.851565	0.408079	-0.912947	0.742855	5.96415	4.64444	5.87802	84.122	123.508	0.320017	2.0637	0.343949	0.44783	0.186011	0.939578	4.25884
581	765.375	767.082	5	100	0	0	0	1.48326	1	0.618601	2.22755	79.0064	0.329586	0.0718933	0.351315	0.199991	0.487759	0.471915	0.382667	4.96198	6242.01	0.236718	11.0531	493159	-0.208589	0.347827	1.89766	1.85633	2.63346	2.35891	0.791978	-0.610549	0.579896	0.814691	-0.449838	-0.89311	0.786512	1.4925	8.88855	19.2436	70.7564	87.3792	0.574096	1.91246	0.318743	0.34045	0.160152	0.858968	3.6575
876	715.787	799.515	5	100	0	0	0	0.653005	0	0.632824	35.3613	14.0812	0.054144	0.493889	0.0522132	0.452925	0.452691	0.45125	0.400466	1250.42	198.28	0.253425	44216.5	2792.02	-0.198717	1.54853	1.14864	1.88292	3.46737	1.17535	-0.719985	-0.69399	0.591424	0.806361	0.998434	0.0559377	0.795502	5.94654	3.75249	3.10374	86.8963	131.789	0.232689	1.95711	0.326185	0.45197	0.212085	0.929129	3.83029
578	729.326	779.104	5	100	0	0	0	0.906243	1	0.242189	11.467	9.39493	0.0701022	0.482354	0.0655938	0.44614	0.452336	0.464932	0.0586555	131.492	88.2647	0.0142057	1507.82	829.241	-0.615846	1.05945	0.972894	1.27403	1.60698	1.23059	-0.890922	0.454157	0.239828	0.970815	0.0298435	-0.999555	0.492127	3.3863	3.06512	4.01986	85.9801	129.025	0.264768	1.98146	0.330243	0.449238	0.203632	0.928274	3.92618
352	708.273	759.853	5	100	0	0	0	0.599858	0	0.555534	13.8215	16.5761	0.214315	0.459507	0.199865	0.46753	0.480617	0.491592	0.308618	191.034	274.767	0.171448	2640.37	4554.57	-0.255289	1.14056	1.21948	1.74287	2.90995	1.86856	0.95059	0.310451	0.527397	0.849619	-0.763126	-0.64625	0.745342	3.71773	4.07138	12.3753	77.6247	105.166	0.462942	2.31343	0.385571	0.463518	0.138761	0.994114	5.35194
349	694.074	750.993	5	100	0	0	0	0.575937	0	0.470328	48.4716	15.4075	0.158411	0.474498	0.149152	0.465741	0.476762	0.48407	0.221208	2349.5	237.391	0.104041	113884	3657.6	-0.327599	1.68549	1.18773	1.60052	2.53861	1.5982	-0.975219	-0.22124	0.453179	0.89142	0.295963	-0.955199	0.685805	6.96215	3.92524	9.11468	80.8853	114.187	0.398009	2.20863	0.368106	0.47012	0.166144	0.975207	4.87806
1172	908.25	816.026	5	100	0	0	0	0.419771	0	0.745235	24.8048	22.5219	0.290905	0.42038	0.262254	0.447802	0.463644	0.49151	0.555375	615.278	507.236	0.413885	15261.9	11423.9	-0.127707	1.39454	1.35261	2.10694	4.25033	2.34369	-0.322095	0.946707	0.678145	0.734929	-0.506182	-0.862427	0.86327	4.98044	4.74572	16.9121	73.0879	93.2326	0.539356	2.37649	0.396082	0.434091	0.0958213	0.993578	5.64773
377	953.61	847.821	5	100	0	0	0	0.498451	0	0.515496	47.1746	35.7725	0.395828	0.372813	0.4195	0.484572	0.448337	0.369085	0.265736	2225.44	1279.67	0.136986	104984	45777.1	-0.287775	1.67371	1.55355	1.67447	2.77277	3.20535	-0.0506885	-0.998715	0.492966	0.870048	-0.937363	-0.348355	0.717981	6.86838	5.98101	23.3176	66.6824	77.6067	0.629149	2.49013	0.415023	0.407664	0.0452269	1.02161	6.20077
397	995.03	676.453	5	100	0	0	0	0.928271	1	0.454731	13.6409	10.6234	0.0424692	0.486223	0.0399314	0.441645	0.443485	0.453886	0.20678	186.074	112.857	0.0940294	2538.22	1198.92	-0.342245	1.13484	1.02626	1.57575	2.41119	1.13486	0.879366	0.476146	0.439221	0.898379	-0.931539	-0.363642	0.674337	3.69336	3.25936	2.43404	87.566	133.828	0.206081	1.90764	0.31794	0.442565	0.214959	0.915179	3.63909
957	992.576	646.343	5	100	0	0	0	0.829488	0	0.337252	27.9555	17.9471	0.226801	0.416153	0.19822	0.422058	0.452705	0.499206	0.113739	781.51	322.098	0.0383587	21847.5	5780.73	-0.472045	1.44647	1.25399	1.40109	1.94734	1.94755	0.313459	-0.949602	0.330895	0.943668	-0.784851	0.619684	0.580734	5.2873	4.2364	13.1088	76.8912	103.188	0.476236	2.21514	0.369191	0.419106	0.125208	0.946676	4.90686
229	399.598	752.349	5	100	0	0	0	0.675473	0	0.568956	23.4687	25.8976	0.276786	0.449093	0.286297	0.499367	0.498134	0.445572	0.323711	550.78	670.686	0.184177	12926.1	17369.1	-0.244921	1.37049	1.41326	1.76642	3.03733	2.25264	-0.995656	-0.0931098	0.538753	0.842464	0.692435	0.72148	0.754292	4.84445	5.08897	16.0685	73.9315	95.3974	0.526105	2.45525	0.409208	0.447333	0.10158	1.02776	6.02825
242	437.063	745.161	5	100	0	0	0	0.695218	0	0.558391	35.0793	13.6154	0.202622	0.441588	0.182115	0.442757	0.465289	0.496961	0.311801	1230.56	185.379	0.174107	43167.1	2524.01	-0.253062	1.54505	1.13403	1.74786	3.00201	1.81405	-0.498425	-0.866933	0.529822	0.848109	0.86694	0.498413	0.747256	5.92278	3.68991	11.6903	78.3097	107.031	0.450136	2.23133	0.371889	0.442172	0.14065	0.963701	4.97884
1128	543.742	731.151	5	100	0	0	0	0.481777	0	0.525243	25.8338	31.0544	0.169106	0.42913	0.192166	0.455714	0.478371	0.391136	0.27588	667.385	964.376	0.144904	17241.1	29948.1	-0.27964	1.41219	1.49212	1.69087	2.79982	1.65088	0.645027	0.76416	0.501423	0.865202	-0.353703	0.935358	0.724737	5.0827	5.57265	9.73584	80.2642	112.44	0.411225	2.11562	0.352604	0.410133	0.13653	0.916067	4.47586
1237	408.772	825.115	5	100	0	0	0	0.484657	0	0.614095	26.1678	22.0983	0.304179	0.400268	0.267762	0.428297	0.449541	0.490765	0.377113	684.754	488.335	0.231583	17918.5	10791.4	-0.211764	1.41777	1.34436	1.84798	3.32021	2.43499	0.859892	0.510475	0.576219	0.817295	-0.106947	-0.994265	0.783642	5.11545	4.70088	17.7088	72.2912	91.2113	0.551524	2.34081	0.390135	0.414282	0.0866926	0.975096	5.4794
1050	393.882	809.135	5	100	0	0	0	0.51489	0	0.588441	24.9048	20.8438	0.313837	0.411805	0.282723	0.446123	0.458899	0.486336	0.346263	620.249	434.464	0.203755	15447.2	9055.88	-0.230297	1.39628	1.31898	1.80118	3.1573	2.4997	-0.225972	0.974134	0.555065	0.831807	0.911678	-0.410906	0.767099	4.99047	4.5655	18.2906	71.7094	89.7489	0.560212	2.39972	0.399954	0.428964	0.0829067	0.997069	5.75867
1043	509.147	890.285	5	100	0	0	0	0.541847	0	0.389309	37.2404	28.4655	0.241018	0.459444	0.249018	0.494956	0.49864	0.449915	0.151561	1386.85	810.285	0.0590043	51646.8	23065.2	-0.409706	1.57101	1.45432	1.47596	2.16098	2.0389	-0.442793	0.896624	0.379549	0.925172	-0.190004	-0.981783	0.623946	6.10249	5.33531	13.9466	76.0534	100.952	0.490936	2.39299	0.398832	0.45468	0.120693	1.01353	5.72641
1012	492.146	875.372	5	100	0	0	0	0.862443	0	0.287963	9.45068	69.5218	0.369134	0.0805259	0.3448	0.193283	0.497111	0.465098	0.0829227	89.3154	4833.28	0.0238787	844.091	336018	-0.540663	0.975463	1.84212	1.33371	1.74874	2.8874	-0.0258991	-0.999665	0.284	0.958824	0.395637	0.918407	0.536622	3.0742	8.33797	21.6622	68.3378	81.5078	0.607564	1.94995	0.324992	0.356967	0.160441	0.87317	3.80231
478	894.555	902.719	5	100	0	0	0	0.539789	0	0.634464	55.6442	41.5044	0.385961	0.401126	0.37924	0.481402	0.458068	0.426959	0.402545	3096.28	1722.62	0.2554	172290	71496.1	-0.197593	1.74542	1.61809	1.88601	3.50651	3.12484	-0.786096	0.618104	0.592746	0.80539	-0.616032	-0.787721	0.796532	7.4595	6.44239	22.7034	67.2966	79.043	0.621258	2.53276	0.422126	0.414042	0.0410291	1.03806	6.41485
1265	841.453	989.385	5	100	0	0	0	0.416912	0	0.248173	42.3237	30.4453	0.187803	0.430833	0.211786	0.464406	0.484058	0.397379	0.0615898	1791.3	926.916	0.0152849	75814.3	28220.2	-0.605245	1.62658	1.48352	1.28168	1.63796	1.74629	-0.996148	-0.0876881	0.245633	0.969363	-0.82524	0.564783	0.49817	6.50567	5.51773	10.8246	79.1754	109.41	0.433362	2.17626	0.362711	0.414106	0.129831	0.934685	4.73613
479	920.722	959.738	5	100	0	0	0	0.45763	0	0.483398	76.5668	31.3783	0.193835	0.446421	0.213293	0.476554	0.490179	0.413972	0.233674	5862.47	984.598	0.112957	448871	30895	-0.315695	1.88404	1.49663	1.62158	2.61361	1.77977	0.920194	0.391462	0.464791	0.885421	-0.0376177	0.999292	0.695268	8.75025	5.60163	11.1767	78.8233	108.439	0.440267	2.23425	0.372376	0.430196	0.133512	0.959745	4.99189
1273	867.83	980.151	5	100	0	0	0	0.878392	0	0.555258	13.6409	34.7864	0.294085	0.42705	0.315961	0.495944	0.493849	0.418004	0.308311	186.074	1210.09	0.171192	2538.22	42094.8	-0.255505	1.13484	1.54141	1.74239	2.90688	2.35502	0.879366	0.476146	0.527163	0.849764	-0.226888	-0.973921	0.745156	3.69336	5.898	17.1027	72.8973	92.7471	0.542296	2.44489	0.407482	0.422527	0.0860388	1.0165	5.9775
547	806.566	783.501	5	100	0	0	0	0.561673	0	0.598501	38.9341	27.4811	0.280529	0.443274	0.294219	0.498926	0.497641	0.436762	0.358203	1515.86	755.211	0.214385	59018.8	20754	-0.222935	1.59033	1.43903	1.81939	3.25073	2.28687	0.944144	0.329532	0.563405	0.826181	0.712626	-0.701544	0.773628	6.23972	5.24224	16.2918	73.7082	94.822	0.52965	2.45135	0.408558	0.440018	0.0975373	1.02425	6.00912
545	667.258	934.658	5	100	0	0	0	0.583413	0	0.425763	9.18441	39.1785	0.414019	0.350908	0.36607	0.413161	0.403351	0.435879	0.181274	84.3534	1534.95	0.0771798	774.736	60137.2	-0.370832	0.963051	1.59305	1.53076	2.25647	3.24328	0.23806	-0.97125	0.413016	0.910724	0.995825	0.0912809	0.652505	3.03058	6.25927	24.4576	65.5424	74.9761	0.643443	2.38339	0.397231	0.408256	0.032198	0.975674	5.68054
455	593.795	914.955	5	100	0	0	0	0.60776	0	0.57985	32.126	25.9492	0.303247	0.432477	0.282748	0.469368	0.474971	0.482272	0.336226	1032.08	673.361	0.194961	33156.6	17473.2	-0.236684	1.50686	1.41412	1.78577	3.12408	2.43737	0.651889	0.758314	0.547898	0.836545	0.728725	0.684806	0.761479	5.66798	5.09404	17.6527	72.3473	91.3528	0.550679	2.44508	0.407514	0.450923	0.090583	1.01854	5.97843
1049	568.723	896.793	5	100	0	0	0	0.542855	0	0.519621	48.6758	21.4835	0.213776	0.472282	0.217551	0.493465	0.497687	0.45961	0.270006	2369.33	461.541	0.140301	115329	9915.51	-0.284313	1.68731	1.33211	1.68139	2.79621	1.88186	-0.999822	-0.018885	0.496551	0.868007	0.486124	-0.87389	0.720847	6.9768	4.63503	12.3437	77.6563	105.252	0.462359	2.35437	0.392395	0.465946	0.137606	1.00922	5.54306
1369	577.145	828.855	5	100	0	0	0	0.826978	0	0.49944	6.86576	18.4501	0.142171	0.488763	0.141621	0.479833	0.484329	0.462771	0.24944	47.1387	340.406	0.12458	323.643	6280.53	-0.301517	0.836689	1.266	1.6478	2.53741	1.51396	0.550176	0.835049	0.478934	0.877851	-0.388917	0.921273	0.706711	2.62026	4.29536	8.17349	81.8265	116.86	0.377056	2.19949	0.366581	0.471302	0.174263	0.978841	4.83775
522	718.296	773.693	5	100	0	0	0	0.545248	0	0.675026	19.7988	17.192	0.212428	0.418429	0.185344	0.420339	0.452239	0.499645	0.45566	391.992	295.565	0.307582	7760.98	5081.35	-0.170679	1.29664	1.23533	1.96408	3.68968	1.86433	0.812976	0.582298	0.624918	0.780691	-0.996239	-0.0866508	0.8216	4.44958	4.14632	12.2647	77.7353	105.466	0.460899	2.18842	0.364737	0.419384	0.132069	0.940963	4.7892
299	648.622	763.015	5	100	0	0	0	0.504015	0	0.479731	59.9998	30.129	0.185938	0.438614	0.207598	0.468737	0.486037	0.404119	0.230142	3599.98	907.757	0.110406	215998	27349.8	-0.319002	1.77815	1.47898	1.61564	2.5905	1.73792	-0.30462	-0.952474	0.461541	0.887119	-0.959979	0.280073	0.692626	7.74595	5.48899	10.7158	79.2842	109.711	0.431205	2.19104	0.365174	0.421366	0.133566	0.943033	4.80067
664	851.789	707.454	5	100	0	0	0	0.626417	0	0.375189	33.1523	21.2647	0.289984	0.402934	0.254574	0.426583	0.450627	0.493759	0.140767	1099.07	452.187	0.0528141	36436.9	9615.63	-0.42575	1.52051	1.32766	1.45527	2.10009	2.34177	0.986323	-0.164822	0.366448	0.930438	0.664219	-0.747538	0.612527	5.7578	4.61137	16.857	73.143	93.3733	0.538502	2.31846	0.38641	0.414759	0.0940354	0.969582	5.37526
451	578.888	948.276	5	100	0	0	0	0.725567	0	0.528533	40.435	27.9136	0.129202	0.447079	0.115056	0.427506	0.450903	0.487464	0.279347	1634.99	779.169	0.147644	66110.8	21749.4	-0.276928	1.60676	1.44582	1.69644	2.83893	1.46902	0.394666	-0.918825	0.504267	0.863548	0.352961	-0.935638	0.727003	6.35885	5.28333	7.42348	82.5765	119.012	0.359447	2.05721	0.342868	0.437292	0.172136	0.923854	4.23211
844	564	946.999	5	100	0	0	0	0.483432	0	0.618624	2.22755	68.3418	0.404769	0.124374	0.432461	0.271678	0.4747	0.41594	0.382696	4.96198	4670.6	0.236745	11.0531	319197	-0.208573	0.347827	1.83469	1.85637	2.63354	2.78002	0.791978	-0.610549	0.579915	0.814677	-0.698456	0.715653	0.786527	1.4925	8.26691	23.8767	66.1233	76.311	0.636215	2.12392	0.353987	0.410354	0.131639	0.915688	4.51104
719	557.4	941.543	5	100	0	0	0	0.964462	1	0.280404	4.98094	68.5474	0.399466	0.12049	0.429467	0.268305	0.475071	0.419748	0.0786264	24.8098	4698.75	0.0220472	123.576	322087	-0.552216	0.697311	1.83599	1.32366	1.7005	3.01461	-0.964156	0.265335	0.276744	0.960944	-0.537642	0.843173	0.529532	2.2318	8.27934	23.5448	66.4552	77.0789	0.632033	2.11255	0.352091	0.409607	0.133111	0.91236	4.46285
802	617.377	963.802	5	100	0	0	0	0.583989	0	0.58372	36.0215	33.7187	0.213582	0.409864	0.245127	0.460936	0.482694	0.384417	0.340729	1297.55	1136.95	0.19889	46739.6	38336.5	-0.233795	1.55656	1.52787	1.79269	3.15448	1.88322	-0.994301	-0.106613	0.551132	0.834418	0.743854	-0.668342	0.764016	6.00179	5.80678	12.3323	77.6677	105.283	0.462149	2.19662	0.366103	0.397141	0.112013	0.931088	4.82514
1074	577.569	973.448	5	100	0	0	0	0.63643	0	0.212597	21.4817	75.6553	0.23925	0.0358556	0.267386	0.140352	0.484515	0.491185	0.0451975	461.463	5723.72	0.00960885	9913.02	433030	-0.672443	1.33207	1.87884	1.23689	1.52353	2.02918	0.487696	-0.873014	0.210999	0.977486	0.254254	0.967137	0.461082	4.63484	8.69801	13.8423	76.1577	101.229	0.489132	1.65854	0.276424	0.253318	0.182908	0.791036	2.75077
1117	584.111	969.596	5	100	0	0	0	0.71767	0	0.241585	14.176	35.3841	0.179093	0.417027	0.205942	0.451558	0.47707	0.3833	0.0583633	200.959	1252.03	0.0140997	2848.79	44302.1	-0.61693	1.15155	1.54881	1.27327	1.60813	1.69543	0.999246	-0.0388233	0.239242	0.97096	-0.73562	-0.677395	0.491513	3.7651	5.94845	10.3169	79.6831	110.818	0.423194	2.11399	0.352332	0.400164	0.128056	0.909295	4.46895
1226	604.5	970.381	5	100	0	0	0	1.06992	1	0.618624	2.22755	79.9625	0.187302	0.0212086	0.211362	0.105147	0.478179	0.493363	0.382696	4.96198	6394	0.236745	11.0531	511280	-0.208573	0.347827	1.90289	1.85637	2.63354	1.67733	0.791978	-0.610549	0.579915	0.814677	-0.989051	-0.147572	0.786527	1.4925	8.94218	10.7954	79.2046	109.491	0.432784	1.49656	0.249427	0.199332	0.194957	0.750549	2.2397
448	529.902	947.782	5	100	0	0	0	0.562305	0	0.615852	46.8048	22.3656	0.168054	0.476688	0.17573	0.484789	0.491494	0.443139	0.379274	2190.69	500.22	0.233576	102535	11187.7	-0.210524	1.67029	1.34958	1.85123	3.37268	1.64646	0.313702	-0.949521	0.577654	0.816282	-0.365762	-0.930708	0.784762	6.8414	4.72923	9.67469	80.3253	112.611	0.409944	2.23989	0.373316	0.459913	0.156924	0.979446	5.01713
1436	550.875	909.976	5	100	0	0	0	0.200769	0	0.618611	2.22755	76.8211	0.341727	0.0679068	0.322706	0.179466	0.498512	0.477793	0.38268	4.96198	5901.48	0.23673	11.0531	453358	-0.208582	0.347827	1.88548	1.85635	2.6335	2.42398	0.791978	-0.610549	0.579904	0.814685	0.98908	0.147381	0.786518	1.4925	8.76476	19.9821	70.0179	85.5648	0.584574	1.88811	0.314685	0.332217	0.167556	0.857051	3.56496
449	537.18	918.792	5	100	0	0	0	0.509686	0	0.555539	37.6713	25.8998	0.256872	0.456116	0.26594	0.498348	0.499728	0.448455	0.308624	1419.13	670.8	0.171452	53460.4	17373.6	-0.255285	1.57601	1.4133	1.74288	2.98898	2.13386	-0.0278083	0.999613	0.527401	0.849616	0.694021	0.719955	0.745345	6.1377	5.08918	14.8845	75.1155	98.4773	0.506825	2.42546	0.404243	0.452286	0.112663	1.02173	5.88285
406	964.493	432.945	5	100	0	0	0	0.545754	0	0.654321	41.584	23.455	0.0137997	0.479696	0.0149087	0.428985	0.429699	0.383252	0.428136	1729.23	550.137	0.280138	71908.3	12903.5	-0.184209	1.61893	1.37024	1.92384	3.62687	1.04223	-0.676718	-0.736242	0.608621	0.793461	-0.994287	-0.106741	0.808901	6.44857	4.84304	0.79069	89.2093	138.899	0.117472	1.75034	0.291723	0.406118	0.217006	0.863755	3.06369
869	920.283	454.878	5	100	0	0	0	0.72516	0	0.365374	15.0256	20.0311	0.0589461	0.493115	0.0567575	0.453685	0.454221	0.4535	0.133498	225.769	401.245	0.0487768	3392.31	8037.38	-0.437262	1.17683	1.3017	1.44105	2.04092	1.192	0.630629	-0.776085	0.357299	0.93399	0.925193	0.379497	0.604462	3.87629	4.47561	3.37932	86.6207	130.955	0.242788	1.97022	0.328371	0.453593	0.210097	0.931487	3.88178
645	931.767	444.396	5	100	0	0	0	0.491508	0	0.545671	28.6999	22.8689	0.180401	0.474907	0.188226	0.48759	0.493991	0.445634	0.297757	823.684	522.987	0.162477	23639.7	11960.1	-0.263069	1.45788	1.35925	1.72577	2.91824	1.70513	-0.412836	-0.910805	0.518992	0.854779	-0.769304	-0.638883	0.738695	5.35723	4.78214	10.3931	79.6069	110.606	0.424736	2.27075	0.378458	0.460271	0.151319	0.986849	5.1563
400	902.673	433.492	5	100	0	0	0	0.557504	0	0.569503	21.5969	24.6136	0.23941	0.462436	0.247177	0.496854	0.499822	0.451679	0.324334	466.426	605.829	0.184709	10073.4	14911.6	-0.244504	1.33439	1.39118	1.76739	3.03358	2.02099	0.384115	-0.923285	0.539214	0.842169	-0.496135	0.868246	0.754654	4.64725	4.96121	13.8517	76.1483	101.204	0.489295	2.39738	0.399563	0.457058	0.122521	1.01635	5.74742
391	851.955	412.969	5	100	0	0	0	0.624526	0	0.581928	37.2404	41.2685	0.378128	0.339427	0.428375	0.470663	0.439919	0.324718	0.33864	1386.85	1703.09	0.197064	51646.8	70283.9	-0.235131	1.57101	1.61562	1.78949	3.14543	3.04313	-0.442793	0.896624	0.549636	0.835405	-0.414866	-0.909883	0.762842	6.10249	6.42406	22.2178	67.7822	80.1879	0.614921	2.38123	0.396872	0.403251	0.0585629	0.980913	5.67026
619	859.313	431.605	5	100	0	0	0	1.30812	1	0.485305	3.15023	34.038	0.441662	0.353591	0.417015	0.444028	0.402392	0.391051	0.235521	9.92395	1158.59	0.114299	31.2627	39435.9	-0.313985	0.498342	1.53196	1.62467	2.31879	3.155	-0.00863724	-0.999963	0.466478	0.884533	0.496463	-0.868058	0.696638	1.77489	5.83421	26.21	63.79	71.0204	0.664577	2.44974	0.40829	0.409703	0.0340323	1.00299	6.00122
586	876.967	442.178	5	100	0	0	0	0.742991	0	0.350006	24.503	15.9664	0.137465	0.488497	0.135168	0.476555	0.481529	0.467133	0.122504	600.397	254.926	0.0428772	14711.5	4070.25	-0.455925	1.38922	1.20321	1.41908	1.99402	1.50172	-0.588936	0.80818	0.342903	0.939371	-0.25557	-0.966791	0.591613	4.95005	3.9958	7.90118	82.0988	117.639	0.370763	2.18635	0.364391	0.471844	0.176804	0.976209	4.78011
431	899.132	496.328	5	100	0	0	0	0.582862	0	0.668154	37.7043	23.2593	0.246748	0.464049	0.248943	0.496265	0.498357	0.462595	0.44643	1421.61	540.995	0.298284	53601	12583.2	-0.175123	1.57639	1.3666	1.95063	3.71746	2.07044	0.00518813	0.999987	0.619538	0.784967	-0.954552	-0.298046	0.817407	6.14038	4.82279	14.2852	75.7148	100.055	0.496737	2.41696	0.402826	0.463322	0.121011	1.02315	5.84168
1115	912.898	472.077	5	100	0	0	0	0.713456	0	0.666378	29.6774	31.6185	0.0808203	0.441651	0.0919241	0.426627	0.44849	0.374301	0.44406	880.748	999.73	0.295912	26138.3	31609.9	-0.176279	1.47243	1.49994	1.94717	3.68212	1.27276	-0.985966	-0.166945	0.618143	0.786066	0.201191	0.979552	0.81632	5.4477	5.62303	4.63572	85.3643	127.183	0.284289	1.86381	0.310636	0.400464	0.175685	0.856325	3.4738
323	830.104	588.908	5	100	0	0	0	0.491793	0	0.602495	66.7516	17.1645	0.183005	0.479902	0.179145	0.483376	0.489596	0.474983	0.363	4455.78	294.62	0.218706	297430	5057.01	-0.220047	1.82446	1.23463	1.82667	3.30095	1.71902	-0.701966	-0.71221	0.5667	0.823924	-0.993479	-0.114011	0.776206	8.17017	4.14301	10.5448	79.4552	110.185	0.427791	2.29001	0.381668	0.477442	0.155456	0.997424	5.24413
1456	787.125	577.422	5	100	0	0	0	0.911823	1	0.618601	2.22755	17.7412	0.251755	0.405278	0.21849	0.417237	0.449001	0.499056	0.382667	4.96198	314.75	0.236718	11.0531	5584.05	-0.208589	0.347827	1.24898	1.85633	2.63346	1.9543	0.791978	-0.610549	0.579896	0.814691	-0.894966	0.446134	0.786512	1.4925	4.21203	14.5814	75.4186	99.2738	0.501752	2.24082	0.373469	0.411258	0.112461	0.948743	5.02126
1443	784.5	578.629	5	100	0	0	0	0.853335	0	0.24085	4.16736	77.8311	0.429012	0.161498	0.474082	0.326943	0.447838	0.363475	0.0580087	17.3669	6057.68	0.0139714	72.3741	471476	-0.618253	0.619861	1.89115	1.27233	1.57677	3.19346	-0.855112	-0.518443	0.238528	0.971136	0.65086	-0.759198	0.490765	2.04141	8.82219	25.4049	64.5951	72.8244	0.65499	2.20285	0.367141	0.396243	0.114625	0.935121	4.85254
318	692.891	577.583	5	100	0	0	0	0.525767	0	0.709082	45.9763	30.0038	0.085937	0.437894	0.0981308	0.425961	0.449357	0.372973	0.502797	2113.82	900.228	0.356525	97185.6	27010.3	-0.149304	1.66253	1.47718	2.03212	4.04153	1.29252	0.911777	-0.410686	0.651137	0.75896	-0.987438	0.158005	0.84207	6.78058	5.47757	4.92991	85.0701	126.308	0.29315	1.87025	0.311709	0.399467	0.172201	0.855125	3.49785
866	690.353	618.801	5	100	0	0	0	1.18359	1	0.378403	6.49435	36.9944	0.109761	0.434177	0.125512	0.433781	0.4587	0.378107	0.143189	42.1766	1368.59	0.0541831	273.909	50630	-0.422045	0.812536	1.56814	1.45995	2.04447	1.38108	0.209599	0.977787	0.369437	0.929256	-0.647814	0.761798	0.615145	2.5484	6.0823	6.30154	83.6985	122.268	0.331302	1.94004	0.32334	0.405944	0.161589	0.870544	3.76375
918	695.18	634.002	5	100	0	0	0	0.725849	0	0.678406	27.8221	12.6631	0.15508	0.469147	0.144045	0.458425	0.471953	0.486622	0.460235	774.069	160.354	0.312226	21536.2	2030.58	-0.16851	1.44439	1.10254	1.97073	3.76036	1.57948	0.436976	-0.899473	0.627553	0.778574	0.0965786	0.995325	0.823654	5.27467	3.55852	8.92144	81.0786	114.733	0.393802	2.18527	0.364212	0.463786	0.166547	0.966743	4.77541
894	647.279	620.391	5	100	0	0	0	0.773283	0	0.196021	8.03153	85.957	0.114161	0.00663612	0.108161	0.0555256	0.454567	0.485691	0.0384242	64.5055	7388.61	0.00753196	518.078	635102	-0.707697	0.904798	1.93428	1.21655	1.46624	1.40108	0.98428	-0.176617	0.194768	0.980849	-0.906111	-0.42304	0.442743	2.834	9.2713	6.55524	83.4448	121.528	0.337877	1.22474	0.204124	0.111161	0.209946	0.685847	1.49999
317	662.233	615.464	5	100	0	0	0	0.599716	0	0.489119	61.1252	28.697	0.127148	0.45432	0.140973	0.455974	0.472242	0.401308	0.239237	3736.29	823.518	0.117016	228381	23632.5	-0.310585	1.78622	1.45784	1.63088	2.63919	1.46079	-0.990786	-0.135439	0.469848	0.882747	-0.410193	-0.911999	0.69937	7.81826	5.35696	7.30482	82.6952	119.354	0.356578	2.05197	0.341994	0.427814	0.162886	0.913466	4.21056
44	432.486	97.519	5	100	0	0	0	0.569369	0	0.637119	30.2569	26.893	0.182256	0.468114	0.193489	0.48501	0.493179	0.435819	0.405921	915.48	723.233	0.25862	27699.6	19449.9	-0.195779	1.48082	1.42964	1.89102	3.48323	1.71576	-0.916414	0.400232	0.594882	0.803813	0.982106	-0.188331	0.798197	5.50063	5.18585	10.5012	79.4988	110.306	0.426915	2.25787	0.376311	0.451966	0.147325	0.978869	5.09796
777	428.046	124.828	5	100	0	0	0	0.453331	0	0.503285	29.7191	15.6768	0.168756	0.450223	0.15212	0.441871	0.463487	0.493837	0.253296	883.225	245.762	0.12748	26248.6	3852.76	-0.298186	1.47304	1.19526	1.65415	2.69072	1.64556	-0.992069	-0.125697	0.482306	0.876003	0.0311582	-0.999514	0.709426	5.45152	3.95939	9.7155	80.2845	112.497	0.410799	2.17029	0.361716	0.446047	0.156994	0.953029	4.71018
87	469.043	139.908	5	100	0	0	0	0.472544	0	0.603956	64.2339	24.0006	0.245274	0.463837	0.249087	0.496887	0.499073	0.459696	0.364763	4125.99	576.029	0.220301	265029	13825	-0.218995	1.80776	1.38022	1.82934	3.30905	2.06604	0.985796	0.16795	0.567903	0.823095	-0.905324	0.424722	0.777146	8.01461	4.89904	14.198	75.802	100.286	0.495251	2.41385	0.402309	0.461766	0.121264	1.02208	5.82669
88	469.5	168.875	5	100	0	0	0	0.892959	0	0.453223	2.72818	78.1781	0.28033	0.0471466	0.284344	0.154553	0.49329	0.491753	0.205411	7.44297	6111.82	0.093097	20.3058	477810	-0.343688	0.435873	1.89309	1.57338	2.17562	2.13861	0.401737	-0.915755	0.437865	0.899041	0.35388	-0.935291	0.673218	1.65172	8.84184	16.2799	73.7201	94.8526	0.529462	1.75142	0.291903	0.282337	0.178582	0.818964	3.06746
90	568.038	172.819	5	100	0	0	0	0.546399	0	0.705725	67.4535	26.9721	0.0734657	0.461634	0.0813804	0.439132	0.452717	0.38932	0.498048	4549.97	727.494	0.351485	306912	19622	-0.151364	1.829	1.43091	2.02531	4.04239	1.24553	-0.995886	-0.0906176	0.648586	0.761142	0.964153	-0.265346	0.840074	8.21301	5.19347	4.21307	85.7869	128.446	0.271046	1.89765	0.316275	0.414226	0.186712	0.880049	3.60107
152	509.613	187.618	5	100	0	0	0	0.513865	0	0.398991	36.6699	30.0447	0.0879222	0.439375	0.100226	0.428042	0.450899	0.374927	0.159194	1344.68	902.684	0.0635169	49309.3	27120.9	-0.399037	1.56431	1.47777	1.49032	2.20206	1.30001	-0.856893	0.515494	0.388489	0.921453	-0.980152	0.198248	0.631657	6.05557	5.4813	5.04408	84.9559	125.969	0.296517	1.88139	0.313565	0.401485	0.172039	0.859026	3.53963
603	477.614	179.385	5	100	0	0	0	0.859556	0	0.39715	5.22406	80.4125	0.323668	0.069799	0.351138	0.199624	0.485234	0.472078	0.157728	27.2908	6466.17	0.0626417	142.569	519961	-0.401045	0.718008	1.90532	1.48758	2.09213	2.48656	-0.871928	0.489635	0.386792	0.922167	-0.954777	0.297323	0.630198	2.28562	8.9673	18.8849	71.1151	88.2675	0.568918	1.90154	0.316923	0.337403	0.160279	0.855038	3.61586
48	541.216	113.433	5	100	0	0	0	0.542099	0	0.63629	50.4769	33.9689	0.265852	0.398942	0.302805	0.4737	0.485372	0.382804	0.404865	2547.92	1153.89	0.257612	128611	39196.2	-0.196345	1.70309	1.53108	1.88946	3.51394	2.19734	0.209846	0.977734	0.594216	0.804306	0.555213	-0.831708	0.797678	7.10471	5.82828	15.4176	74.5824	97.0846	0.515608	2.30947	0.384912	0.390873	0.0884236	0.963348	5.33367
89	517.54	150.739	5	100	0	0	0	0.505611	0	0.533199	55.9106	31.8455	0.145444	0.426841	0.166653	0.444038	0.469833	0.382815	0.284301	3126	1014.14	0.151589	174776	32295.7	-0.273111	1.74749	1.50305	1.70438	2.87578	1.54223	-0.595644	0.803248	0.508291	0.861185	0.416483	0.909143	0.730205	7.47734	5.64318	8.36299	81.637	116.319	0.381371	2.03562	0.339271	0.404828	0.144881	0.891953	4.14377
761	872.063	186.737	5	100	0	0	0	0.936315	1	0.214627	4.45509	83.92	0.307381	0.0548411	0.29687	0.1635	0.496251	0.487709	0.0460647	19.8478	7042.57	0.00988674	88.4239	591012	-0.668316	0.648856	1.92387	1.2394	1.5061	2.3624	-0.967081	-0.254469	0.212983	0.977056	0.785189	-0.619256	0.463279	2.11071	9.16079	17.9015	72.0985	90.7257	0.55442	1.80655	0.301092	0.302126	0.174666	0.834554	3.26363
863	891.75	195.962	5	100	0	0	0	0.940965	1	0.227535	8.18453	78.9017	0.188887	0.0198731	0.188535	0.09748	0.479805	0.49703	0.0517722	66.9865	6225.48	0.01178	548.253	491201	-0.642952	0.912994	1.89709	1.2555	1.557	1.73774	0.945865	-0.324562	0.225577	0.974225	-0.354037	-0.935232	0.477006	2.86086	8.88266	10.8878	79.1122	109.236	0.434611	1.47161	0.245268	0.188711	0.198713	0.747243	2.16564
131	749.518	246.533	5	100	0	0	0	0.500957	0	0.356263	18.4363	16.3928	0.252003	0.422243	0.223773	0.436395	0.460581	0.498094	0.126923	339.897	268.724	0.0452181	6266.45	4405.14	-0.448229	1.26567	1.21465	1.42798	2.01178	2.0848	-0.401593	0.915818	0.348774	0.937207	-0.632547	-0.774522	0.596878	4.29375	4.0488	14.5961	75.4039	99.2351	0.501999	2.29309	0.382181	0.429319	0.115036	0.970846	5.25826
1041	804.251	221.641	5	100	0	0	0	0.472751	0	0.550934	42.4116	20.3525	0.091685	0.489662	0.0954018	0.46672	0.470021	0.43092	0.303528	1798.74	414.224	0.167224	76287.6	8430.5	-0.2589	1.62748	1.30862	1.73487	2.96755	1.31421	-1	9.91765e-05	0.523483	0.852036	0.997699	0.0678002	0.742249	6.51242	4.51137	5.26055	84.7394	125.328	0.302795	2.04441	0.340735	0.44882	0.192413	0.938997	4.17961
135	815.693	248.244	5	100	0	0	0	0.76586	0	0.64612	12.302	29.1913	0.179842	0.438425	0.201243	0.466261	0.484453	0.402346	0.417471	151.339	852.132	0.269736	1861.77	24874.8	-0.189687	1.08998	1.46525	1.90812	3.41356	1.69646	-0.261302	0.965257	0.602093	0.798426	-0.79376	-0.608231	0.803816	3.50742	5.4029	10.3606	79.6394	110.696	0.424078	2.17257	0.362095	0.420385	0.13591	0.937569	4.72006
132	760.578	262.401	5	100	0	0	0	0.544378	0	0.486694	34.7239	28.7311	0.157652	0.454565	0.173442	0.468294	0.483201	0.411668	0.236871	1205.75	825.476	0.115284	41868.3	23716.8	-0.312744	1.54063	1.45835	1.62693	2.61152	1.59721	-0.165614	-0.986191	0.467706	0.883884	-0.441048	-0.897483	0.697635	5.8927	5.36014	9.07064	80.9294	114.311	0.397054	2.14882	0.358137	0.433117	0.15116	0.940116	4.61744
133	790.047	269.118	5	100	0	0	0	0.472088	0	0.58323	43.0214	41.5771	0.429484	0.334496	0.458276	0.466516	0.406652	0.319409	0.340157	1850.84	1728.66	0.19839	79625.8	71872.5	-0.23416	1.63368	1.61885	1.79182	3.1609	3.53531	-0.819706	0.572785	0.550723	0.834688	-0.671622	-0.740894	0.763695	6.55907	6.44803	25.4348	64.5652	72.7569	0.65535	2.41483	0.402472	0.418068	0.0624228	0.995684	5.83142
134	809.052	259.906	5	100	0	0	0	0.746542	0	0.446098	16.2168	19.0184	0.168804	0.475897	0.160363	0.47122	0.481036	0.483436	0.199003	262.985	361.7	0.088775	4264.77	6878.95	-0.35057	1.20997	1.27917	1.5622	2.38288	1.6435	-0.487162	-0.873312	0.431449	0.902137	0.168043	0.98578	0.667906	4.02701	4.36101	9.71829	80.2817	112.489	0.410858	2.24076	0.373459	0.473558	0.161872	0.98379	5.02099
1248	782.703	236.683	5	100	0	0	0	0.474875	0	0.379213	30.8255	17.0282	0.0963379	0.493223	0.0941491	0.466653	0.469473	0.460083	0.143802	950.211	289.96	0.0545318	29290.7	4937.49	-0.421117	1.48891	1.23117	1.46113	2.11533	1.33175	-0.556715	0.830703	0.370189	0.928956	-0.968774	-0.247946	0.615803	5.55207	4.12652	5.52833	84.4717	124.537	0.310383	2.07992	0.346653	0.463368	0.195064	0.9546	4.32606
1263	870.229	389.797	5	100	0	0	0	0.655906	0	0.605209	25.3491	19.6041	0.174619	0.479895	0.169032	0.479075	0.486398	0.478334	0.366278	642.577	384.321	0.221675	16288.7	7534.26	-0.218095	1.40396	1.29235	1.83163	3.26152	1.67483	0.214675	0.976686	0.568934	0.822383	0.684957	0.728584	0.777952	5.03479	4.42765	10.0565	79.9435	111.543	0.417874	2.26735	0.377892	0.478704	0.159654	0.9921	5.14089
987	835.941	381.155	5	100	0	0	0	0.541065	0	0.676481	43.7362	30.78	0.265377	0.449478	0.277915	0.498245	0.499086	0.440534	0.457627	1912.86	947.408	0.309576	83661	29161.2	-0.169744	1.64084	1.48827	1.96694	3.78995	2.19154	-0.243621	0.969871	0.626053	0.779781	-0.593923	0.804522	0.822485	6.61334	5.54797	15.3894	74.6106	97.1581	0.515148	2.43063	0.405106	0.445006	0.106238	1.02034	5.90799
1037	857.284	365.325	5	100	0	0	0	0.538022	0	0.640526	7.38793	29.6121	0.409324	0.354663	0.36233	0.415636	0.407542	0.439818	0.410274	54.5815	876.876	0.262791	403.244	25966.2	-0.193463	0.868523	1.47147	1.89748	3.25062	3.15335	0.893349	0.449363	0.597617	0.801782	-0.972971	-0.230927	0.800329	2.71807	5.4417	24.1624	65.8376	75.6529	0.639784	2.38931	0.398219	0.408433	0.0329521	0.978212	5.70882
1360	856	391.877	5	100	0	0	0	0.715497	0	0.479763	6.68264	26.0812	0.0663363	0.466171	0.0730389	0.439694	0.451163	0.39102	0.230173	44.6577	680.229	0.110428	298.431	17741.2	-0.318973	0.824948	1.41633	1.61569	2.44796	1.21721	0.388916	0.921273	0.461569	0.887104	0.812518	0.582936	0.692649	2.58508	5.10698	3.80358	86.1964	129.675	0.257558	1.88742	0.314571	0.415357	0.191363	0.881377	3.56237
762	891.864	196.848	5	100	0	0	0	1.05636	1	0.399169	21.0146	42.8974	0.168366	0.469773	0.178877	0.481104	0.489098	0.432668	0.159336	441.613	1840.19	0.0636019	9280.33	78939.2	-0.398843	1.32252	1.63243	1.49059	2.18903	1.6473	0.82857	-0.559886	0.388653	0.921384	-0.884255	0.467004	0.631798	4.58417	6.54961	9.69283	80.3072	112.561	0.410324	2.21989	0.369981	0.451221	0.153359	0.968974	4.92789
986	872.622	220.301	5	100	0	0	0	0.567797	0	0.719582	41.9409	31.242	0.413763	0.380365	0.398247	0.465488	0.434526	0.413926	0.517798	1759.04	976.063	0.372598	73775.7	30494.1	-0.14292	1.62264	1.49474	2.05357	4.11603	3.36441	-0.891296	-0.453422	0.65907	0.752081	-0.173051	0.984913	0.848282	6.47618	5.58945	24.4414	65.5586	75.0129	0.643244	2.50631	0.417719	0.413845	0.0295597	1.02533	6.28161
723	858.262	191.623	5	100	0	0	0	0.876188	0	0.304569	10.3287	21.7243	0.186089	0.480518	0.185327	0.487505	0.492683	0.468521	0.0927623	106.682	471.945	0.0282525	1101.89	10252.7	-0.516314	1.01405	1.33695	1.35604	1.80704	1.72256	-0.785759	-0.618533	0.299882	0.953976	0.263693	-0.964607	0.551878	3.21383	4.66093	10.7246	79.2754	109.687	0.43138	2.30064	0.383441	0.474519	0.153377	0.999891	5.29296
635	869.194	191.392	5	100	0	0	0	0.861518	0	0.428142	20.0479	28.8831	0.320909	0.435551	0.32309	0.496636	0.488314	0.447798	0.183306	401.918	834.233	0.0784808	8057.62	24095.2	-0.368412	1.30207	1.46064	1.5344	2.31262	2.5531	0.931438	0.363901	0.415181	0.909739	-0.571856	-0.820354	0.654326	4.47749	5.3743	18.7179	71.2821	88.6826	0.566488	2.5123	0.418716	0.441674	0.0784285	1.04053	6.31164
985	839.469	136.792	5	100	0	0	0	0.650451	0	0.63671	41.5248	18.3391	0.189083	0.442424	0.169408	0.439511	0.46282	0.496101	0.4054	1724.31	336.323	0.258122	71601.6	6167.85	-0.196058	1.61831	1.26338	1.89025	3.505	1.74882	-0.631972	-0.774991	0.594553	0.804056	-0.488575	0.872522	0.797941	6.44397	4.28242	10.8993	79.1007	109.204	0.434837	2.19935	0.366558	0.440967	0.146623	0.955866	4.83713
785	814.5	110.992	5	100	0	0	0	0.571339	0	0.407486	10.3287	28.2898	0.150238	0.470919	0.160843	0.47595	0.485616	0.427568	0.166045	106.682	800.313	0.0676609	1101.89	22640.7	-0.389887	1.01405	1.45163	1.50303	2.1903	1.55572	-0.785759	-0.618533	0.396302	0.91812	-0.0154655	-0.99988	0.638346	3.21383	5.31882	8.64072	81.3593	115.529	0.387605	2.17113	0.361856	0.449244	0.161081	0.956751	4.71382
1334	759.375	143.544	5	100	0	0	0	0.75653	0	0.618621	2.22755	46.1186	0.496247	0.239044	0.460219	0.352462	0.381444	0.279486	0.382692	4.96198	2126.93	0.236741	11.0531	98090.8	-0.208575	0.347827	1.66388	1.85637	2.63353	3.34306	0.791978	-0.610549	0.579912	0.814679	0.844317	-0.535844	0.786525	1.4925	6.79107	29.752	60.248	63.3523	0.704448	2.2089	0.36815	0.366953	0.0998379	0.929003	4.87925
1227	784.836	143.407	5	100	0	0	0	0.484835	0	0.486854	27.2363	5.1156	0.0862635	0.431561	0.0748684	0.401268	0.430321	0.478437	0.237027	741.816	26.1694	0.115397	20204.3	133.872	-0.312601	1.43515	0.708897	1.62719	2.60285	1.2888	0.861407	-0.507915	0.467848	0.883809	-0.919806	0.392374	0.697749	5.21884	2.26177	4.94868	85.0513	126.252	0.293706	1.90272	0.31712	0.415795	0.18493	0.879992	3.62034
807	809.465	125.8	5	100	0	0	0	0.789751	0	0.441635	27.9111	30.1275	0.00981005	0.442283	0.0111737	0.394802	0.41067	0.346464	0.195041	779.03	907.666	0.0861371	21743.6	27345.7	-0.354937	1.44578	1.47896	1.55525	2.38575	1.02985	0.355299	-0.934753	0.427418	0.904054	-0.960398	0.278632	0.664556	5.2831	5.48885	0.562083	89.4379	139.611	0.0990457	1.6152	0.2692	0.370633	0.20277	0.800244	2.60888
1370	711.188	233.502	5	100	0	0	0	0.897471	0	0.208785	4.45509	85.3974	0.159445	0.0149826	0.174284	0.085529	0.47181	0.492278	0.0435912	19.8478	7292.72	0.00910118	88.4239	622779	-0.680301	0.648856	1.93144	1.23218	1.49015	1.58562	-0.967081	-0.254469	0.207271	0.978283	-0.54333	-0.839519	0.45693	2.11071	9.24107	9.17468	80.8253	114.018	0.399306	1.39833	0.233055	0.166864	0.201193	0.726828	1.95532
130	728.402	241.843	5	100	0	0	0	0.461369	0	0.580566	35.1502	29.064	0.401358	0.381748	0.37255	0.45161	0.433909	0.437548	0.337057	1235.54	844.716	0.195684	43429.4	24550.8	-0.236148	1.54593	1.46336	1.78705	3.13386	3.23635	-0.558587	-0.829446	0.548497	0.836152	-0.710118	-0.704082	0.761949	5.92876	5.3911	23.6631	66.3369	76.8047	0.633528	2.47872	0.413121	0.417633	0.0324927	1.01454	6.14407
487	731.224	277.697	5	100	0	0	0	0.55755	0	0.569161	44.0191	21.2228	0.067182	0.492464	0.0697522	0.459822	0.460804	0.424824	0.323944	1937.68	450.407	0.184376	85295	9558.9	-0.244765	1.64364	1.3268	1.76678	3.0765	1.22214	0.0367945	0.999323	0.538926	0.842353	0.694949	-0.719059	0.754428	6.63469	4.60682	3.85215	86.1479	129.529	0.259195	1.97485	0.329141	0.442323	0.20305	0.925285	3.90003
129	695.363	262.998	5	100	0	0	0	0.635604	0	0.575475	27.5082	11.348	0.0200097	0.495021	0.0192795	0.443149	0.438453	0.438373	0.331171	756.701	128.777	0.190581	20815.5	1461.36	-0.239974	1.43946	1.05492	1.77797	3.08751	1.06171	0.693355	-0.720597	0.544233	0.838934	-0.938538	0.345175	0.758601	5.24483	3.36868	1.14655	88.8535	137.793	0.141456	1.85429	0.309048	0.438413	0.225188	0.909181	3.43837
653	707.429	270.2	5	100	0	0	0	0.921378	1	0.430365	7.21807	27.2515	0.200684	0.471272	0.208642	0.491474	0.497119	0.448716	0.185214	52.1005	742.644	0.0797096	376.065	20238.2	-0.366163	0.858421	1.43539	1.53782	2.25308	1.7889	0.804531	0.593911	0.417203	0.908814	0.853588	-0.520949	0.656022	2.68665	5.2203	11.577	78.423	107.341	0.447978	2.31791	0.386318	0.459994	0.141756	0.997959	5.37269
846	808.401	300.034	5	100	0	0	0	0.651104	0	0.614189	38.2917	28.3408	0.221319	0.444156	0.241543	0.484641	0.494746	0.419147	0.377228	1466.25	803.201	0.231689	56145.4	22763.4	-0.211698	1.5831	1.45241	1.84816	3.35009	1.92525	0.55851	0.829498	0.576296	0.817241	-0.0664172	-0.997792	0.783702	6.18803	5.32361	12.7865	77.2135	104.055	0.470446	2.30555	0.384259	0.431651	0.12166	0.979762	5.31557
1294	632.625	226.682	5	100	0	0	0	0.28351	0	0.618621	2.22755	65.8242	0.435676	0.153295	0.455394	0.301347	0.464006	0.386	0.382692	4.96198	4332.83	0.236741	11.0531	285205	-0.208575	0.347827	1.81839	1.85637	2.63353	2.96594	0.791978	-0.610549	0.579912	0.814679	0.148692	-0.988884	0.786525	1.4925	8.11321	25.8283	64.1717	71.8727	0.660058	2.19572	0.365953	0.410838	0.120229	0.935844	4.82118
968	624.002	216.715	5	100	0	0	0	0.695054	0	0.478262	27.8666	35.5378	0.392976	0.384698	0.408189	0.487188	0.454414	0.387755	0.228735	776.547	1262.94	0.109395	21639.7	44881.9	-0.320334	1.44508	1.55069	1.61327	2.56097	3.15817	0.39653	-0.918022	0.460237	0.887796	-0.830654	-0.556789	0.691565	5.27888	5.96136	23.1398	66.8602	78.0212	0.626878	2.51522	0.419203	0.400583	0.0420726	1.03113	6.32633
1017	689.181	216.25	5	100	0	0	0	0.893043	0	0.550324	25.3979	22.3796	0.0422473	0.442568	0.037042	0.400871	0.421196	0.463377	0.302857	645.053	500.846	0.166669	16383	11208.7	-0.259382	1.4048	1.34985	1.73381	2.93675	1.13462	0.262062	0.965051	0.522963	0.852355	-0.378756	-0.925497	0.741838	5.03963	4.73071	2.42131	87.5787	133.867	0.205541	1.8073	0.301217	0.411033	0.203694	0.86709	3.26634
1133	701.859	231.882	5	100	0	0	0	0.68443	0	0.57132	34.4011	22.2764	0.0677406	0.489461	0.0710415	0.45796	0.460097	0.419707	0.326407	1183.44	496.238	0.186483	40711.5	11054.4	-0.243121	1.53657	1.34785	1.7706	3.07706	1.2241	0.155782	-0.987791	0.540743	0.841188	-0.281399	-0.959591	0.755857	5.86525	4.71979	3.88423	86.1158	129.432	0.26027	1.96601	0.327668	0.438833	0.201286	0.920206	3.86518
1047	709.269	207.946	5	100	0	0	0	1.03019	1	0.424012	8.03153	38.0065	0.104932	0.433892	0.120136	0.431422	0.456524	0.376268	0.179786	64.5055	1444.49	0.0762315	518.078	54900.2	-0.372622	0.904798	1.57986	1.52808	2.23781	1.36328	0.98428	-0.176617	0.41142	0.911446	0.30257	0.953127	0.651162	2.834	6.16494	6.02325	83.9768	123.082	0.323932	1.92317	0.320529	0.403845	0.163334	0.865923	3.6986
309	634.917	417.095	5	100	0	0	0	0.500407	0	0.420612	43.6796	17.946	0.0318104	0.495644	0.0308096	0.447542	0.444133	0.441741	0.176914	1907.91	322.059	0.0744123	83336.6	5779.67	-0.376118	1.64028	1.25397	1.52289	2.30067	1.09987	-0.298096	0.954536	0.408319	0.912839	-0.785532	0.618821	0.648546	6.60905	4.23627	1.82291	88.1771	135.703	0.178355	1.89168	0.31528	0.442937	0.220861	0.916683	3.57845
253	452.502	401.961	5	100	0	0	0	0.480348	0	0.474549	36.3644	20.697	0.145291	0.483865	0.150383	0.481181	0.486745	0.445547	0.225197	1322.37	428.366	0.106867	48087.2	8865.89	-0.323719	1.56068	1.31591	1.60729	2.55199	1.53899	-0.972261	0.233898	0.456937	0.889499	0.961976	-0.273132	0.688875	6.03029	4.5494	8.35413	81.6459	116.344	0.381171	2.19301	0.365502	0.463364	0.169273	0.972017	4.8093
668	456.017	365.184	5	100	0	0	0	0.486338	0	0.630313	35.1502	26.9692	0.347367	0.42403	0.345211	0.492046	0.479141	0.444332	0.397294	1235.54	727.338	0.25042	43429.4	19615.7	-0.200444	1.54593	1.43087	1.8782	3.45015	2.77017	-0.558587	-0.829446	0.589398	0.807843	0.964919	-0.262549	0.793923	5.92876	5.19319	20.3264	69.6736	84.7256	0.589378	2.53213	0.422021	0.434181	0.0634681	1.04343	6.41167
797	468.375	351.39	5	100	0	0	0	0.682136	0	0.618621	2.22755	71.2244	0.404254	0.100023	0.372938	0.210736	0.491441	0.442811	0.382692	4.96198	5072.92	0.236741	11.0531	361315	-0.208575	0.347827	1.85263	1.85637	2.63353	2.77755	0.791978	-0.610549	0.579912	0.814679	0.858445	-0.512905	0.786525	1.4925	8.43945	23.8444	66.1556	76.3855	0.63581	2.0222	0.337034	0.388596	0.150309	0.891355	4.0893
1003	479.82	377.508	5	100	0	0	0	0.368482	0	0.736522	31.0261	41.3305	0.476603	0.299739	0.469068	0.422473	0.337465	0.290393	0.542465	962.619	1708.21	0.399537	29866.3	70601.2	-0.132814	1.49173	1.61627	2.08866	4.216	4.02435	-0.380028	0.924975	0.671715	0.740809	-0.470445	-0.882429	0.858209	5.57011	6.42888	28.4638	61.5362	66.0905	0.690364	2.29574	0.382623	0.379969	0.0840338	0.955883	5.27043
685	592.558	609.649	5	100	0	0	0	0.700505	0	0.144271	11.3583	80.9097	0.174718	0.0172174	0.177769	0.0906126	0.47611	0.495505	0.0208141	129.011	6546.38	0.00300287	1465.35	529666	-0.840821	1.05531	1.908	1.1552	1.32966	1.67384	-0.934933	0.354824	0.143771	0.989611	-0.697361	0.71672	0.37983	3.37021	8.99498	10.0622	79.9378	111.527	0.417993	1.43193	0.238655	0.176243	0.200551	0.736778	2.05043
314	593.893	599.191	5	100	0	0	0	0.63138	0	0.489708	26.025	28.9408	0.045925	0.482279	0.049229	0.444113	0.447431	0.400242	0.239814	677.301	837.57	0.117439	17626.7	24239.9	-0.310063	1.41539	1.46151	1.63184	2.61516	1.14719	0.778491	0.627655	0.470368	0.88247	-0.618212	-0.786011	0.699791	5.10147	5.37967	2.63223	87.3678	133.223	0.214301	1.86922	0.311536	0.422177	0.206117	0.891488	3.49398
486	540.087	596.708	5	100	0	0	0	0.707003	0	0.386337	11.3583	24.167	0.174873	0.471087	0.185064	0.484242	0.492201	0.43717	0.149256	129.011	584.044	0.0576632	1465.35	14114.6	-0.413034	1.05531	1.38322	1.47158	2.1112	1.67031	-0.934933	0.354824	0.376798	0.926295	-0.822471	0.568807	0.62156	3.37021	4.91599	10.0713	79.9287	111.502	0.418178	2.24464	0.374106	0.454128	0.151585	0.977048	5.0384
312	538.279	573.74	5	100	0	0	0	0.518238	0	0.576612	35.291	26.3112	0.376562	0.400756	0.353654	0.464654	0.452766	0.451037	0.332481	1245.45	692.279	0.191713	43953.3	18214.7	-0.239116	1.54766	1.42014	1.78	3.11019	3.01064	-0.669459	-0.742849	0.545187	0.838315	0.924018	0.382349	0.75935	5.94062	5.12944	22.1209	67.8791	80.4173	0.613646	2.49943	0.416571	0.425897	0.0460854	1.02558	6.24715
1501	556.447	587.815	5	100	0	0	0	0.729102	0	0.232459	5.89353	86.0983	0.400567	0.0980242	0.370592	0.209474	0.49221	0.445374	0.0540372	34.7337	7412.92	0.0125614	204.704	638240	-0.633654	0.770375	1.93499	1.2617	1.56405	3.0659	-0.37987	0.92504	0.230371	0.973103	-0.956657	-0.291216	0.48214	2.42766	9.27892	23.6136	66.3864	76.9193	0.632904	2.01624	0.33604	0.385579	0.151242	0.889893	4.06523
103	637.125	4.547	5	100	0	0	0	0.47354	0	0.618624	2.22755	59.8567	0.259271	0.426884	0.285299	0.487193	0.494088	0.409592	0.382696	4.96198	3582.82	0.236745	11.0531	214456	-0.208573	0.347827	1.77711	1.85637	2.63354	2.00176	0.791978	-0.610549	0.579915	0.814677	-0.165672	-0.986181	0.786527	1.4925	7.73671	15.0268	74.9732	98.1046	0.509187	2.36233	0.393721	0.418238	0.0999944	0.989996	5.58059
17	611.25	0	5	100	0	0	0	0.464149	0	0.694899	2.22755	16.5742	0.0402225	0.498953	0.0405039	0.454403	0.45052	0.430104	0.482885	4.96198	274.704	0.335556	11.0531	4553	-0.158078	0.347827	1.21943	2.00351	2.88444	1.12552	0.791978	-0.610549	0.640308	0.768118	-0.761897	-0.647698	0.833606	1.4925	4.07114	2.3052	87.6948	134.222	0.200555	1.91471	0.319118	0.440312	0.217088	0.920137	3.6661
16	589.502	20.016	5	100	0	0	0	0.53237	0	0.626215	50.5271	24.4759	0.147607	0.469359	0.158691	0.474059	0.484377	0.424659	0.392145	2552.99	599.07	0.245567	128995	14662.8	-0.203277	1.70352	1.38874	1.87052	3.4456	1.55099	0.258643	0.965973	0.586082	0.810252	-0.610618	0.791925	0.791337	7.10824	4.94731	8.48827	81.5117	115.962	0.384197	2.15875	0.359792	0.447009	0.161403	0.952343	4.66021
831	632.409	38.319	5	100	0	0	0	0.651225	0	0.38939	24.6543	27.9369	0.201933	0.446368	0.221465	0.479355	0.491722	0.416088	0.151625	607.835	780.47	0.0590411	14985.7	21803.9	-0.409615	1.39189	1.44618	1.47608	2.15259	1.81593	-0.460396	0.887714	0.379624	0.925141	0.331067	-0.943607	0.624011	4.96531	5.28554	11.65	78.35	107.141	0.44937	2.25693	0.376155	0.431228	0.13024	0.966317	5.09374
756	639.242	28.244	5	100	0	0	0	0.717841	0	0.526821	15.1898	21.8339	0.337386	0.403839	0.304832	0.446028	0.453487	0.478076	0.27754	230.73	476.719	0.146214	3504.74	10408.6	-0.278337	1.18155	1.33913	1.69354	2.76855	2.65228	0.495285	-0.86873	0.502788	0.86441	0.156601	-0.987662	0.725824	3.89741	4.67268	19.7177	70.2823	86.2123	0.580849	2.42365	0.403941	0.424933	0.0692449	1.00149	5.87407
18	625.378	11.605	5	100	0	0	0	0.444392	0	0.608211	27.3272	36.991	0.261918	0.458168	0.25411	0.488149	0.491914	0.477893	0.369921	746.776	1368.33	0.22499	20407.3	50616	-0.215946	1.4366	1.5681	1.83714	3.28688	2.16598	0.811745	-0.584012	0.5714	0.820672	-0.650401	0.759591	0.779879	5.22754	6.08202	15.1839	74.8161	97.6939	0.511779	2.43215	0.405359	0.468031	0.114758	1.02554	5.91536
50	592.074	130.942	5	100	0	0	0	0.507523	0	0.364291	60.9631	32.8498	0.22039	0.440964	0.24185	0.482511	0.49361	0.41539	0.132708	3716.5	1079.11	0.0483443	226569	35448.5	-0.438552	1.78507	1.51653	1.43949	2.06319	1.92401	-0.955938	-0.293568	0.356287	0.934377	0.990641	0.136495	0.603565	7.80789	5.73147	12.7319	77.2681	104.202	0.469457	2.29472	0.382453	0.428177	0.120756	0.974951	5.26572
630	613.563	193.646	5	100	0	0	0	0.564502	0	0.58075	28.8292	22.1112	0.329767	0.397022	0.292964	0.433928	0.447928	0.482894	0.337271	831.123	488.905	0.19587	23960.6	10810.3	-0.236011	1.45983	1.34461	1.78738	3.12228	2.6219	-0.52683	-0.849971	0.548651	0.836051	-0.119763	-0.992802	0.76207	5.36928	4.70225	19.2546	70.7454	87.3521	0.574253	2.3845	0.397417	0.415475	0.073045	0.987077	5.68585
508	615.46	117.181	5	100	0	0	0	0.587636	0	0.617349	48.625	19.3981	0.116466	0.489942	0.119576	0.475005	0.478861	0.444059	0.38112	2364.39	376.286	0.235284	114968	7299.24	-0.209469	1.68686	1.28776	1.85401	3.38454	1.41409	-0.997573	-0.0696297	0.578876	0.815416	0.521445	0.853285	0.785716	6.97316	4.40433	6.68819	83.3118	121.141	0.341271	2.12391	0.353985	0.459532	0.183412	0.959183	4.51099
1150	83.108	901.641	5	100	0	0	0	0.513279	0	0.604098	35.8144	29.5273	0.216891	0.465897	0.226355	0.493537	0.498632	0.446685	0.364934	1282.67	871.861	0.220456	45938.1	25743.7	-0.218893	1.55406	1.47022	1.8296	3.28102	1.90041	-0.951132	-0.308785	0.56802	0.823015	-0.949916	-0.312506	0.777237	5.98451	5.4339	12.5265	77.4735	104.757	0.465716	2.348	0.391333	0.456291	0.132838	1.00353	5.51309
943	115.125	871.005	5	100	0	0	0	0.186101	0	0.618601	2.22755	84.7277	0.448815	0.171344	0.467921	0.3213	0.453606	0.365124	0.382667	4.96198	7178.78	0.236718	11.0531	608242	-0.208589	0.347827	1.92803	1.85633	2.63346	3.0518	0.791978	-0.610549	0.579896	0.814691	0.0951575	-0.995462	0.786512	1.4925	9.20477	26.6677	63.3323	70.0049	0.669937	2.22811	0.371352	0.406969	0.1137	0.944485	4.96447
276	123.399	838.566	5	100	0	0	0	0.504638	0	0.440841	34.22	27.2839	0.325096	0.435136	0.321098	0.492678	0.48539	0.456192	0.194341	1171.01	744.411	0.0856734	40071.9	20310.4	-0.355718	1.53428	1.43591	1.55401	2.38803	2.59825	0.331147	-0.943579	0.4267	0.904393	0.836264	-0.548327	0.663959	5.84979	5.2234	18.9714	71.0286	88.053	0.570172	2.51559	0.419265	0.445664	0.0773072	1.04143	6.32819
525	63.775	860.044	5	100	0	0	0	0.572488	0	0.570077	20.9555	33.8366	0.442215	0.327331	0.389364	0.398068	0.374775	0.406821	0.324988	439.133	1144.92	0.185268	9202.25	38740	-0.244066	1.3213	1.52939	1.7684	3.03423	3.60676	0.860193	-0.509968	0.539697	0.841859	0.660075	-0.751199	0.755034	4.57772	5.81692	26.2453	63.7547	70.9417	0.664992	2.33857	0.389762	0.393716	0.0380361	0.9585	5.46893
753	72.638	876.134	5	100	0	0	0	0.556811	0	0.511595	23.042	31.9531	0.432892	0.356812	0.400362	0.437429	0.406139	0.409001	0.261729	530.934	1021	0.133899	12233.8	32624.1	-0.291074	1.36252	1.50451	1.66795	2.72091	3.51837	-0.867847	-0.496832	0.489569	0.871965	0.51171	0.859158	0.715259	4.80021	5.65271	25.6512	64.3488	72.27	0.657945	2.44264	0.407106	0.40757	0.0288579	0.999287	5.96647
265	98.886	839.329	5	100	0	0	0	0.588779	0	0.578641	20.1713	22.3439	0.274675	0.451261	0.262926	0.483235	0.48762	0.480783	0.334825	406.881	499.25	0.193744	8207.33	11155.2	-0.237591	1.30473	1.34916	1.78361	3.08025	2.2327	0.969146	0.246486	0.546887	0.837207	-0.345481	-0.938426	0.760685	4.49125	4.72693	15.9426	74.0574	95.7224	0.524094	2.4405	0.40675	0.466022	0.107686	1.02501	5.95604
254	71.897	843.962	5	100	0	0	0	0.657865	0	0.596772	29.1715	34.6339	0.390901	0.393411	0.397075	0.4868	0.457081	0.404485	0.356137	850.976	1199.51	0.212532	24824.3	41543.6	-0.224192	1.46496	1.5395	1.81625	3.22076	3.14071	-0.781562	-0.623827	0.561975	0.827154	-0.0763066	-0.997084	0.77251	5.40106	5.88506	23.0106	66.9894	78.3231	0.625221	2.52975	0.421626	0.40078	0.0403519	1.0367	6.39965
495	100.234	863.81	5	100	0	0	0	0.502421	0	0.653892	38.7424	15.6544	0.116456	0.492066	0.11498	0.47314	0.476759	0.461317	0.427575	1500.97	245.06	0.279588	58151.3	3836.27	-0.184494	1.58819	1.19464	1.92301	3.61857	1.41306	0.864064	0.503382	0.60828	0.793722	0.0535377	-0.998566	0.808636	6.22434	3.95656	6.68761	83.3124	121.143	0.341257	2.13472	0.355786	0.467228	0.186216	0.96586	4.55702
915	166.5	869.056	5	100	0	0	0	3.44579	1	0.618624	2.22755	75.8027	0.374433	0.0959734	0.388078	0.228208	0.487345	0.450052	0.382696	4.96198	5746.05	0.236745	11.0531	435566	-0.208573	0.347827	1.87968	1.85637	2.63354	2.60545	0.791978	-0.610549	0.579915	0.814677	0.393537	0.919309	0.786527	1.4925	8.70647	21.9893	68.0107	80.7295	0.611909	2.02409	0.337348	0.381255	0.147867	0.890026	4.09694
676	124.863	888.112	5	100	0	0	0	0.453238	0	0.526696	55.5988	26.2299	0.241652	0.460287	0.250862	0.496904	0.499861	0.448487	0.277409	3091.23	688.008	0.14611	171868	18046.4	-0.27844	1.74507	1.4188	1.69333	2.83916	2.04471	-0.813339	0.581791	0.50268	0.864473	0.889915	0.456126	0.725738	7.45646	5.12151	13.9841	76.0159	100.853	0.491581	2.39805	0.399676	0.454387	0.120552	1.01543	5.75066
1261	420.909	315.933	5	100	0	0	0	0.667675	0	0.67326	27.3726	53.9208	0.440861	0.218209	0.499329	0.391984	0.39615	0.263964	0.453279	749.259	2907.45	0.305175	20509.2	156772	-0.171817	1.43732	1.73176	1.96062	3.72176	3.63726	0.784404	-0.620251	0.623538	0.781793	-0.491425	-0.87092	0.820524	5.23188	7.34308	26.1588	63.8412	71.1343	0.663974	2.2105	0.368416	0.394067	0.106942	0.933577	4.8863
117	366.739	227.483	5	100	0	0	0	0.50471	0	0.671379	75.8015	28.0005	0.129465	0.490082	0.131072	0.478378	0.482274	0.453358	0.45075	5745.87	784.028	0.302624	435545	21953.2	-0.173032	1.87968	1.44717	1.95693	3.78471	1.47101	0.392434	0.91978	0.622066	0.782965	0.270424	-0.962741	0.819377	8.70641	5.29155	7.43868	82.5613	118.968	0.359812	2.16463	0.360772	0.465868	0.17897	0.970097	4.68562
648	386.625	266.952	5	100	0	0	0	3.66161	1	0.618621	2.22755	26.6901	0.0789812	0.468309	0.072025	0.434808	0.447727	0.472571	0.382692	4.96198	712.361	0.236741	11.0531	19013	-0.208575	0.347827	1.42635	1.85637	2.63353	1.25631	0.791978	-0.610549	0.579912	0.814679	0.99991	0.0134372	0.786525	1.4925	5.16625	4.53001	85.47	127.498	0.281036	1.97442	0.32907	0.441267	0.196904	0.918466	3.89834
1178	466.875	298.129	5	100	0	0	0	0.487988	0	0.618621	2.22755	64.3089	0.308227	0.439354	0.315107	0.499455	0.49327	0.444628	0.382692	4.96198	4135.63	0.236741	11.0531	265958	-0.208575	0.347827	1.80827	1.85637	2.63353	2.24539	0.791978	-0.610549	0.579912	0.814679	0.995609	0.0936121	0.786525	1.4925	8.01928	17.9524	72.0476	90.5975	0.555182	2.50004	0.416674	0.441991	0.0849612	1.03817	6.25021
765	487.686	288.648	5	100	0	0	0	0.619413	0	0.602854	25.3001	26.5945	0.0708021	0.495412	0.0692058	0.460276	0.460711	0.452464	0.363433	640.095	707.267	0.219097	16194.5	18809.4	-0.219788	1.40312	1.42479	1.82733	3.24673	1.23522	0.166579	0.986028	0.566996	0.823721	0.994061	0.108822	0.776437	5.02992	5.15699	4.06006	85.9399	128.904	0.266087	2.00887	0.334812	0.45637	0.205657	0.940249	4.03556
1404	509.344	235.938	5	100	0	0	0	0.740622	0	0.270228	4.45509	90.2487	0.167435	0.0167552	0.188152	0.0919864	0.473802	0.492337	0.0730232	19.8478	8144.83	0.0197329	88.4239	735060	-0.56827	0.648856	1.95544	1.31026	1.66454	1.62133	-0.967081	-0.254469	0.266951	0.96371	0.756201	-0.65434	0.519835	2.11071	9.49993	9.63872	80.3613	112.712	0.409188	1.43047	0.238411	0.177793	0.199009	0.734208	2.04624
86	459.684	189.087	5	100	0	0	0	0.550939	0	0.569916	42.557	12.086	0.106512	0.484623	0.101073	0.459919	0.466939	0.471865	0.324804	1811.1	146.071	0.185111	77074.9	1765.42	-0.244189	1.62897	1.08228	1.76812	3.07951	1.37158	-0.989434	0.144986	0.539561	0.841946	-0.462108	0.886824	0.754928	6.52357	3.47649	6.11429	83.8857	122.816	0.326362	2.09093	0.348488	0.463429	0.18972	0.953223	4.37199
849	486.673	199.151	5	100	0	0	0	0.720157	0	0.5173	14.7759	22.8875	0.288196	0.445319	0.27482	0.481322	0.48456	0.479232	0.267599	218.327	523.838	0.138429	3225.98	11989.3	-0.286258	1.16955	1.3596	1.67749	2.71721	2.31105	0.802852	-0.596179	0.494535	0.869158	-0.781054	-0.624464	0.719236	3.84394	4.78409	16.75	73.25	93.6468	0.536839	2.45345	0.408908	0.462276	0.099789	1.02617	6.01941
1420	502.5	237.724	5	100	0	0	0	1.03656	1	0.618624	2.22755	25.0623	0.221499	0.465188	0.230804	0.494368	0.499111	0.447564	0.382696	4.96198	628.119	0.236745	11.0531	15742.1	-0.208573	0.347827	1.39902	1.85637	2.63354	1.82135	0.791978	-0.610549	0.579915	0.814677	-0.070383	0.99752	0.786527	1.4925	5.00623	12.7971	77.2029	104.027	0.470637	2.35853	0.393089	0.456376	0.130724	1.00626	5.56268
671	138.889	458.865	5	100	0	0	0	0.496699	0	0.410948	65.1544	22.5052	0.218668	0.470523	0.223499	0.494458	0.498466	0.457687	0.168878	4245.1	506.484	0.0694002	276587	11398.5	-0.386213	1.81394	1.35228	1.50825	2.26312	1.91083	0.730494	-0.682919	0.399479	0.916743	-0.491709	-0.87076	0.641052	8.07183	4.74396	12.6308	77.3692	104.475	0.46762	2.3633	0.393884	0.464105	0.134706	1.01074	5.58519
172	145.694	430.136	5	100	0	0	0	0.585247	0	0.359101	41.7631	12.212	0.0483772	0.486305	0.0455652	0.443528	0.445883	0.455677	0.128954	1744.16	149.133	0.0463073	72841.4	1821.21	-0.444783	1.62079	1.08679	1.43204	2.03822	1.15534	-0.797051	-0.603913	0.351433	0.936213	-0.347	0.937865	0.59925	6.46244	3.49457	2.77289	87.2271	132.795	0.219948	1.92534	0.320889	0.444705	0.212725	0.918738	3.70692
1426	160.086	404.046	5	100	0	0	0	0.595724	0	0.268244	8.48224	50.347	0.465939	0.247352	0.493942	0.40152	0.391678	0.258343	0.0719548	71.9484	2534.82	0.0193015	610.284	127621	-0.57147	0.928511	1.70197	1.30767	1.6821	3.7192	0.809052	-0.587737	0.265039	0.964238	0.0814273	0.996679	0.517923	2.91243	7.09556	27.771	62.229	67.587	0.682597	2.25877	0.376462	0.396599	0.103236	0.950596	5.10206
185	188.775	424.28	5	100	0	0	0	0.973437	1	0.509247	14.9428	13.461	0.0462177	0.488835	0.0437893	0.44533	0.446378	0.453278	0.259333	223.287	181.199	0.132064	3336.54	2439.11	-0.293072	1.17443	1.12908	1.66404	2.67762	1.14769	0.692655	-0.721269	0.48752	0.873112	0.779977	0.625808	0.713615	3.86559	3.66892	2.64902	87.351	133.172	0.214983	1.92383	0.320638	0.445854	0.2141	0.919808	3.70111
704	196.739	441.85	5	100	0	0	0	0.717003	0	0.122438	7.38793	78.7759	0.235461	0.0333065	0.248135	0.130408	0.487917	0.495437	0.0149911	54.5815	6205.64	0.00183548	403.244	488855	-0.912084	0.868523	1.89639	1.13025	1.27237	1.97899	0.893349	0.449363	0.122132	0.992514	-0.233897	-0.972261	0.349911	2.71807	8.87558	13.6188	76.3812	101.824	0.485243	1.63066	0.271777	0.241798	0.187335	0.786543	2.65907
181	181.608	433.552	5	100	0	0	0	0.612594	0	0.381203	20.355	21.0241	0.175374	0.482809	0.17565	0.486684	0.491761	0.465226	0.145316	414.326	442.013	0.0553948	8433.61	9292.92	-0.418844	1.30867	1.32272	1.46404	2.1136	1.67757	0.997865	0.0653057	0.372037	0.928218	0.823214	-0.567732	0.617416	4.51165	4.5852	10.1004	79.8996	111.421	0.418777	2.2775	0.379584	0.474017	0.158326	0.994906	5.18702
194	183.191	328.419	5	100	0	0	0	0.62475	0	0.602987	27.0533	25.9613	0.358858	0.415838	0.344939	0.479191	0.467807	0.452883	0.363593	731.881	673.989	0.219242	19799.8	17497.6	-0.219692	1.43222	1.41433	1.82757	3.25333	2.85246	0.939454	-0.342675	0.567105	0.823645	0.736958	0.675939	0.776522	5.20128	5.09522	21.0301	68.9699	83.0227	0.599048	2.51952	0.419919	0.43436	0.0570266	1.03646	6.34796
193	174.08	333.343	5	100	0	0	0	0.698983	0	0.379672	8.33472	66.6733	0.447361	0.128224	0.401195	0.229581	0.472667	0.39977	0.144151	69.4676	4445.33	0.05473	578.993	296385	-0.420591	0.920891	1.82395	1.46181	2.06734	3.54542	0.886654	-0.462434	0.370616	0.928786	-0.644106	-0.764936	0.616175	2.88699	8.16537	26.5745	63.4255	70.211	0.668851	2.0788	0.346466	0.400483	0.136554	0.901925	4.3214
541	199.165	347.064	5	100	0	0	0	0.781894	0	0.484088	10.7984	17.9195	0.103388	0.491029	0.10026	0.46638	0.470374	0.464468	0.234341	116.605	321.108	0.113442	1259.15	5754.1	-0.315076	1.03336	1.25333	1.62269	2.526	1.35727	-0.980624	-0.195899	0.465401	0.8851	-0.801653	0.597789	0.695764	3.28609	4.23314	5.9343	84.0657	123.343	0.32154	2.0959	0.349317	0.465424	0.191943	0.957258	4.39279
569	180.965	376.28	5	100	0	0	0	0.643157	0	0.436348	52.4063	14.8335	0.085758	0.492864	0.0833353	0.462504	0.464379	0.457268	0.1904	2746.42	220.033	0.0830805	143930	3263.86	-0.360167	1.71938	1.17124	1.54705	2.37617	1.29095	0.84189	-0.53965	0.422632	0.906301	0.767199	-0.641409	0.660566	7.23922	3.85143	4.91961	85.0804	126.339	0.292845	2.04611	0.341018	0.459886	0.199051	0.946502	4.18656
189	162.36	347.52	5	100	0	0	0	0.769672	0	0.665947	19.0322	42.4439	0.435994	0.35439	0.4405	0.46653	0.41327	0.359118	0.443485	362.225	1801.48	0.295338	6893.93	76462	-0.17656	1.27949	1.62782	1.94633	3.62142	3.54655	0.18163	0.983367	0.617804	0.786332	-0.999475	0.0323935	0.816056	4.36259	6.5149	25.8486	64.1514	71.8274	0.660298	2.4698	0.411634	0.424632	0.0457771	1.01347	6.09992
689	172.5	346.843	5	100	0	0	0	4.21498	1	0.618624	2.22755	87.2584	0.265504	0.0444392	0.29104	0.156295	0.487001	0.488743	0.382696	4.96198	7614.03	0.236745	11.0531	664388	-0.208573	0.347827	1.94081	1.85637	2.63354	2.03349	0.791978	-0.610549	0.579915	0.814677	-0.648943	0.760837	0.786527	1.4925	9.34122	15.3969	74.6031	97.1384	0.515271	1.73302	0.288837	0.278272	0.177245	0.81095	3.00337
177	152.731	674.375	5	100	0	0	0	0.851913	0	0.407169	12.8928	31.4746	0.197662	0.425338	0.223728	0.464647	0.484492	0.39472	0.165787	166.224	990.65	0.0675032	2143.1	31180.3	-0.390225	1.11035	1.49796	1.50256	2.20209	1.78683	0.320663	0.947193	0.396011	0.918246	0.0586398	0.998279	0.638098	3.59065	5.61022	11.4003	78.5997	107.825	0.444592	2.19059	0.365098	0.410029	0.123848	0.9362	4.79867
183	175.037	666.972	5	100	0	0	0	0.659983	0	0.59486	29.1289	14.7232	0.239339	0.430216	0.214048	0.441466	0.464128	0.497859	0.353858	848.493	216.773	0.210496	24715.7	3191.59	-0.225585	1.46432	1.168	1.81278	3.20884	2.0155	-0.754286	-0.656546	0.560393	0.828227	0.833141	-0.55306	0.771272	5.39712	3.83708	13.8475	76.1525	101.215	0.489223	2.28706	0.381176	0.435841	0.122135	0.972808	5.23063
1141	178.477	645.535	5	100	0	0	0	0.562423	0	0.499999	21.8821	16.8096	0.189908	0.471507	0.180202	0.473582	0.483758	0.485945	0.249999	478.826	282.563	0.124999	10477.7	4749.77	-0.301031	1.34009	1.22556	1.64872	2.65823	1.74816	0.108833	-0.99406	0.479425	0.877583	-0.891949	-0.452137	0.707106	4.67783	4.09995	10.9474	79.0526	109.071	0.435784	2.2849	0.380817	0.472545	0.15177	0.992623	5.22078
1140	159.565	641.552	5	100	0	0	0	0.753824	0	0.623586	18.7696	45.5803	0.443386	0.312692	0.473637	0.453248	0.378147	0.288557	0.388859	352.298	2077.56	0.242487	6612.49	94696	-0.205104	1.27346	1.65878	1.86561	3.34367	3.62273	-0.0798708	0.996805	0.58395	0.81179	0.99963	-0.0272032	0.789675	4.33239	6.75132	26.3201	63.6799	70.7753	0.665872	2.34967	0.391611	0.410767	0.0777659	0.974881	5.52094
1311	149.156	660.47	5	100	0	0	0	0.569917	0	0.63138	23.1494	25.4923	0.133475	0.464612	0.145421	0.465705	0.47839	0.414208	0.398641	535.895	649.857	0.251694	12405.6	16566.4	-0.199709	1.36454	1.40641	1.8802	3.41861	1.48597	-0.916103	-0.400942	0.590259	0.807214	0.351861	0.936052	0.794594	4.81138	5.04899	7.67045	82.3296	118.301	0.365342	2.10181	0.350302	0.43941	0.164843	0.933881	4.41761
1312	162.234	652.361	5	100	0	0	0	0.558034	0	0.603275	8.91019	12.1493	0.0279498	0.496517	0.0271336	0.447133	0.442916	0.439421	0.363941	79.3915	147.605	0.219556	707.393	1793.3	-0.219485	0.949887	1.08455	1.8281	3.09578	1.08697	0.492176	-0.870496	0.567342	0.823482	-0.405084	0.91428	0.776708	2.98499	3.48558	1.60161	88.3984	136.385	0.167182	1.88107	0.313512	0.441168	0.222487	0.915008	3.53843
188	216.705	649.238	5	100	0	0	0	0.525233	0	0.566338	71.5609	12.7574	0.195403	0.450515	0.1777	0.450433	0.469751	0.495122	0.320739	5120.96	162.751	0.181647	366461	2076.28	-0.246924	1.85468	1.10576	1.7618	3.07647	1.77858	0.640947	-0.767585	0.536545	0.843871	0.18987	0.981809	0.752554	8.45937	3.57175	11.2683	78.7317	108.187	0.442044	2.23892	0.373154	0.450474	0.145576	0.970271	5.01278
742	179.451	620.372	5	100	0	0	0	0.52612	0	0.641546	23.5742	29.1679	0.142274	0.443297	0.159762	0.454438	0.474466	0.396108	0.411581	555.743	850.766	0.264048	13101.2	24815.1	-0.192772	1.37244	1.46491	1.89942	3.4872	1.52534	-0.999925	0.0122548	0.598435	0.801172	-0.779311	-0.626637	0.800966	4.85533	5.40073	8.17945	81.8205	116.843	0.377192	2.07035	0.345058	0.419702	0.152593	0.911489	4.28633
1384	189.375	656.664	5	100	0	0	0	2.54387	1	0.618611	2.22755	46.4177	0.42724	0.291049	0.479527	0.446541	0.373152	0.25723	0.38268	4.96198	2154.6	0.23673	11.0531	100012	-0.208582	0.347827	1.66668	1.85635	2.6335	2.90725	0.791978	-0.610549	0.579904	0.814685	0.64894	-0.76084	0.786518	1.4925	6.81305	25.2925	64.7075	73.0779	0.653636	2.27474	0.379123	0.400196	0.0889854	0.949736	5.17444
1326	116.5	651.251	5	100	0	0	0	0.639683	0	0.43629	2.72818	84.4103	0.33988	0.42089	0.35144	0.49787	0.484196	0.425743	0.190349	7.44297	7125.1	0.0830473	20.3058	601432	-0.360225	0.435873	1.9264	1.54696	2.12182	2.4681	0.401737	-0.915755	0.42258	0.906326	0.401086	-0.916041	0.660523	1.65172	9.18751	19.8696	70.1304	85.8401	0.582992	2.52002	0.420003	0.423316	0.0653274	1.03911	6.3505
647	122.344	693.524	5	100	0	0	0	1.18942	1	0.247309	7.71645	28.0436	0.265705	0.440923	0.283912	0.495426	0.497661	0.427977	0.0611617	59.5436	786.444	0.0151258	459.465	22054.7	-0.60676	0.887418	1.44783	1.28057	1.61488	2.14596	0.990557	0.137098	0.244796	0.969575	0.228692	-0.973499	0.497302	2.77785	5.29562	15.4088	74.5912	97.1073	0.515466	2.4116	0.401934	0.43445	0.102558	1.01089	5.81583
1292	135.139	650.433	5	100	0	0	0	0.762969	0	0.438175	8.18453	22.2513	0.209534	0.473775	0.21302	0.493086	0.497495	0.460396	0.191997	66.9865	495.12	0.0841284	548.253	11017.1	-0.358352	0.912994	1.34736	1.54988	2.29749	1.83553	0.945865	-0.324562	0.424288	0.905527	-0.257227	-0.966351	0.661948	2.86086	4.71713	12.095	77.905	105.927	0.457749	2.34731	0.391218	0.467086	0.140026	1.00814	5.50985
1277	126.559	659.82	5	100	0	0	0	0.577077	0	0.652547	23.7837	26.8148	0.0531729	0.459901	0.0591901	0.429071	0.442219	0.37979	0.425818	565.664	719.033	0.277866	13453.6	19280.7	-0.185388	1.37628	1.42837	1.92043	3.56172	1.17216	-0.975513	0.219942	0.607212	0.79454	0.993817	-0.111033	0.807804	4.87685	5.1783	3.04802	86.952	131.958	0.230592	1.82334	0.303891	0.404431	0.193723	0.861243	3.32458
976	41.344	378.26	5	100	0	0	0	0.6073	0	0.686698	38.998	30.575	0.201032	0.461191	0.214593	0.487261	0.49544	0.433319	0.471554	1520.84	934.831	0.323815	59309.9	28582.4	-0.163234	1.59104	1.48537	1.98714	3.856	1.81503	0.96326	0.26857	0.633987	0.773344	-0.745261	0.666773	0.828672	6.24484	5.52947	11.5973	78.4027	107.285	0.448366	2.29284	0.382139	0.447255	0.136841	0.98479	5.2571
600	26.25	435.886	5	100	0	0	0	0.607246	0	0.286198	7.38793	22.3318	0.19048	0.464838	0.177709	0.465396	0.478714	0.490213	0.0819093	54.5815	498.709	0.0234423	403.244	11137.1	-0.543333	0.868523	1.34892	1.33136	1.73507	1.73756	0.893349	0.449363	0.282307	0.959324	-0.334101	-0.942537	0.534975	2.71807	4.72565	10.9808	79.0192	108.979	0.43644	2.26735	0.377892	0.465117	0.150462	0.984889	5.14088
144	10.916	419.663	5	100	0	0	0	0.684209	0	0.681	28.8292	30.8463	0.360644	0.408587	0.372567	0.494458	0.474231	0.414255	0.463761	831.123	951.494	0.315821	23960.6	29350.1	-0.166853	1.45983	1.4892	1.97585	3.7832	2.8759	-0.52683	-0.849971	0.62957	0.776944	-0.539318	0.842102	0.825227	5.36928	5.55394	21.1398	68.8602	82.7589	0.600536	2.52474	0.42079	0.411421	0.0536983	1.03769	6.37432
1267	17.46	392.298	5	100	0	0	0	0.479918	0	0.582061	17.1101	35.7569	0.466262	0.322726	0.432888	0.41815	0.362136	0.357934	0.338795	292.756	1278.56	0.197199	5009.08	45717.2	-0.235031	1.23325	1.55336	1.78972	3.08275	3.83669	-0.985811	-0.167861	0.549747	0.835331	-0.931815	-0.362935	0.762929	4.13644	5.97971	27.7919	62.2081	67.5415	0.682834	2.3601	0.393349	0.390143	0.0542417	0.971109	5.57005
1445	21.766	405.832	5	100	0	0	0	0.612989	0	0.772696	18.9014	28.6354	0.0172168	0.494666	0.0178678	0.442999	0.437955	0.406002	0.597059	357.263	819.986	0.461345	6752.77	23480.6	-0.111991	1.27649	1.4569	2.1656	4.41363	1.05293	0.0518209	0.998656	0.698068	0.716031	-0.353272	-0.935521	0.879031	4.34757	5.35121	0.986499	89.0135	138.289	0.131213	1.81671	0.302784	0.421978	0.222769	0.893421	3.30042
1059	439.681	641.609	5	100	0	0	0	0.571642	0	0.652313	24.8549	23.4119	0.0863675	0.488301	0.0904712	0.464004	0.467681	0.426093	0.425512	617.766	548.117	0.277567	15354.5	12832.5	-0.185544	1.39541	1.36944	1.91998	3.56535	1.29338	-0.27428	0.96165	0.607026	0.794682	-0.988764	-0.149483	0.807659	4.98547	4.83858	4.95467	85.0453	126.235	0.293883	2.02292	0.337153	0.445049	0.193716	0.932557	4.0922
662	442.013	610.353	5	100	0	0	0	0.540049	0	0.360451	9.96188	24.6756	0.0923195	0.484496	0.0975943	0.463649	0.46901	0.422771	0.129925	99.2391	608.885	0.0468316	988.608	15024.6	-0.443154	0.998341	1.39227	1.43398	2.00517	1.31443	-0.511648	-0.859195	0.352696	0.935738	-0.441385	0.897318	0.600376	3.15624	4.96745	5.29706	84.7029	125.22	0.303841	2.02984	0.338307	0.44321	0.189606	0.930838	4.12025
973	414.14	634.276	5	100	0	0	0	0.540756	0	0.646834	22.4419	9.9574	0.0096842	0.488891	0.00915229	0.434346	0.430796	0.439719	0.418394	503.639	99.1498	0.270632	11302.6	987.274	-0.189207	1.35106	0.998146	1.90949	3.51636	1.02944	-0.435642	-0.90012	0.602663	0.797996	-0.507794	-0.861479	0.80426	4.73729	3.15553	0.554872	89.4451	139.634	0.0984083	1.81259	0.302098	0.432571	0.227687	0.898213	3.28548
269	400.435	607.396	5	100	0	0	0	0.649207	0	0.567066	30.3389	18.8087	0.0159844	0.479073	0.0147892	0.427311	0.428801	0.447084	0.321564	920.449	353.767	0.182348	27925.4	6653.9	-0.246366	1.482	1.27436	1.76309	3.04446	1.04905	-0.880552	0.473949	0.53716	0.843481	-0.0408446	0.999166	0.753038	5.50808	4.3369	0.915878	89.0841	138.509	0.126429	1.81304	0.302174	0.428056	0.222926	0.892376	3.28712
282	425.219	602.046	5	100	0	0	0	0.658029	0	0.591213	29.001	33.3063	0.224843	0.410531	0.256869	0.465794	0.485062	0.38712	0.349533	841.058	1109.31	0.206648	24391.5	36947	-0.228256	1.46241	1.52253	1.80618	3.18612	1.94427	-0.664382	-0.747394	0.557369	0.830265	0.949368	-0.314165	0.768904	5.38526	5.77116	12.9936	77.0064	103.498	0.474176	2.23022	0.371703	0.398825	0.107892	0.941904	4.97388
771	429.623	621.819	5	100	0	0	0	0.527876	0	0.589289	22.6619	22.8473	0.0927979	0.481129	0.0989054	0.46152	0.468139	0.418295	0.347262	513.562	521.999	0.204637	11638.3	11926.3	-0.229672	1.3553	1.35883	1.80271	3.15411	1.31803	-0.621575	-0.783355	0.55577	0.831336	-0.755326	-0.655349	0.767652	4.76045	4.77988	5.32459	84.6754	125.139	0.304627	2.02079	0.336798	0.439908	0.187834	0.925745	4.08358
554	349.456	606.657	5	100	0	0	0	0.747498	0	0.61154	23.4687	12.5619	0.143507	0.476323	0.134946	0.462788	0.473544	0.482036	0.373981	550.78	157.801	0.228704	12926.1	1982.28	-0.213575	1.37049	1.09906	1.84327	3.29372	1.52669	-0.995656	-0.0931098	0.574129	0.818765	-0.0044706	0.99999	0.78201	4.84445	3.54428	8.25083	81.7492	116.639	0.378823	2.17314	0.362191	0.468166	0.172842	0.967711	4.72255
809	339.831	624.441	5	100	0	0	0	0.768731	0	0.617485	22.4419	24.1546	0.32224	0.405345	0.288779	0.441404	0.45421	0.484361	0.381288	503.639	583.445	0.235439	11302.6	14092.9	-0.209374	1.35106	1.383	1.85426	3.32643	2.56168	-0.435642	-0.90012	0.578986	0.815337	-0.829461	0.558565	0.785802	4.73729	4.91473	18.7984	71.2016	88.4823	0.567662	2.39634	0.39939	0.423374	0.077734	0.993623	5.74244
947	373.449	642.635	5	100	0	0	0	0.666575	0	0.478821	40.983	35.8429	0.287797	0.390718	0.327041	0.475864	0.481736	0.377107	0.22927	1679.61	1284.71	0.109779	68835.3	46047.9	-0.319827	1.6126	1.5544	1.61417	2.57689	2.34102	-0.141816	-0.989893	0.460733	0.887539	-0.959545	-0.281556	0.691969	6.4018	5.98689	16.7261	73.2739	93.7078	0.536467	2.34026	0.390044	0.383912	0.0779284	0.971169	5.47683
859	366.472	620.421	5	100	0	0	0	1.50782	1	0.625996	9.31849	24.9249	0.0908312	0.472477	0.0985095	0.454488	0.46414	0.407199	0.391871	86.8343	621.251	0.24531	809.164	15484.6	-0.203428	0.969346	1.39663	1.87011	3.23226	1.30851	0.106088	-0.994357	0.585905	0.81038	-0.206348	0.978479	0.791199	3.05262	4.99248	5.21143	84.7886	125.474	0.301382	1.98764	0.331274	0.430843	0.184678	0.910486	3.95073
856	356.67	619.537	5	100	0	0	0	1.46512	1	0.444902	7.87556	6.99446	0.0558614	0.473043	0.0512565	0.43294	0.441522	0.46343	0.197938	62.0244	48.9225	0.0880629	488.477	342.186	-0.351736	0.896281	0.844754	1.56034	2.32153	1.1795	0.999767	-0.0215767	0.430369	0.902653	0.6528	0.75753	0.66701	2.80634	2.6447	3.20229	86.7977	131.49	0.23635	1.91805	0.319675	0.437231	0.206644	0.90921	3.67893
646	330.075	606.521	5	100	0	0	0	1.25176	1	0.152671	4.98094	10.9281	0.120482	0.477501	0.112815	0.45663	0.466921	0.478288	0.0233084	24.8098	119.423	0.00355852	123.576	1305.07	-0.816243	0.697311	1.03854	1.16494	1.34482	1.41786	-0.964156	0.265335	0.152079	0.988368	-0.997724	-0.0674231	0.390731	2.2318	3.30577	6.91992	83.0801	120.468	0.347105	2.11264	0.352106	0.461776	0.182572	0.95422	4.46324
1441	340.296	491.273	5	100	0	0	0	0.673833	0	0.590733	10.4481	13.1611	0.216726	0.430155	0.192305	0.434335	0.460496	0.498869	0.348965	109.163	173.215	0.206145	1140.54	2279.69	-0.228609	1.01904	1.11929	1.80531	3.05947	1.87171	-0.853842	-0.520532	0.55697	0.830533	0.560285	0.8283	0.768592	3.23235	3.62782	12.5168	77.4832	104.783	0.465538	2.23289	0.372148	0.432245	0.132359	0.958415	4.98578
1388	320.606	490.782	5	100	0	0	0	0.793226	0	0.388051	21.9387	36.5228	0.136061	0.476035	0.144673	0.473961	0.482284	0.428855	0.150584	481.307	1333.91	0.0584341	10559.2	48718.3	-0.411111	1.34121	1.56256	1.4741	2.14387	1.49806	0.0524245	-0.998625	0.378385	0.925648	-0.923195	0.384332	0.622937	4.68388	6.04341	7.81998	82.18	117.872	0.368864	2.14187	0.356978	0.451408	0.168882	0.952473	4.5876
264	314.558	504.041	5	100	0	0	0	0.657871	0	0.402623	21.3077	15.2503	0.245425	0.429476	0.219891	0.44271	0.4646	0.497334	0.162105	454.018	232.572	0.0652673	9674.08	3546.79	-0.395101	1.32854	1.18328	1.49574	2.20409	2.04724	0.631471	-0.7754	0.391833	0.920036	0.441853	-0.897087	0.634526	4.61603	3.90516	14.207	75.793	100.262	0.495404	2.29944	0.383239	0.436093	0.119153	0.975818	5.28741
1505	334.875	499.48	5	100	0	0	0	1.22637	1	0.618624	2.22755	60.8105	0.349706	0.399256	0.31636	0.445581	0.450139	0.473337	0.382696	4.96198	3697.92	0.236745	11.0531	224872	-0.208573	0.347827	1.78398	1.85637	2.63354	2.46522	0.791978	-0.610549	0.579915	0.814677	-0.900205	-0.435467	0.786527	1.4925	7.79811	20.4693	69.5307	84.3782	0.591359	2.43438	0.40573	0.422419	0.0621266	1.00349	5.9262
1470	321.919	494.766	5	100	0	0	0	0.791753	0	0.15798	12.4024	89.4713	0.149553	0.0131478	0.164661	0.0798928	0.468893	0.490851	0.0249577	153.82	8005.11	0.00394281	1907.73	716228	-0.801398	1.09351	1.95168	1.17114	1.36614	1.55672	-0.163237	0.986587	0.157324	0.987547	0.997947	0.0640468	0.397467	3.5217	9.45893	8.60102	81.399	115.642	0.386721	1.367	0.227833	0.157107	0.202674	0.718909	1.86869
1002	229.4	455.01	5	100	0	0	0	0.588438	0	0.568182	8.62725	22.6479	0.0752929	0.496313	0.0762116	0.464667	0.464783	0.439814	0.322831	74.4294	512.927	0.183427	642.121	11616.7	-0.245513	0.935872	1.35503	1.76506	2.90417	1.25006	0.715632	-0.698478	0.538101	0.842881	-0.610547	-0.79198	0.753778	2.93722	4.75898	4.31805	85.6819	128.132	0.274396	2.01708	0.33618	0.45224	0.202522	0.939776	4.06862
190	206.181	447.919	5	100	0	0	0	0.750968	0	0.535034	42.2056	36.5356	0.132785	0.489896	0.133802	0.478877	0.48285	0.456135	0.286261	1781.31	1334.85	0.15316	75181.4	48769.5	-0.271619	1.62537	1.56272	1.70751	2.87678	1.48538	-0.978877	-0.204449	0.50987	0.860251	-0.9182	0.396117	0.73146	6.49658	6.04447	7.63056	82.3694	118.416	0.364397	2.17435	0.362391	0.467506	0.177818	0.972656	4.72778
550	217	429.332	5	100	0	0	0	1.36174	1	0.41948	5.45635	79.5152	0.209619	0.026465	0.227828	0.116678	0.483134	0.495052	0.175963	29.7718	6322.67	0.0738132	162.445	502748	-0.377289	0.736902	1.90045	1.52117	2.17944	1.82953	-0.735792	0.677208	0.407286	0.913301	-0.827917	-0.56085	0.647673	2.33588	8.91713	12.1	77.9	105.914	0.457842	1.55878	0.259796	0.218724	0.191672	0.767238	2.42978
705	223.875	437.126	5	100	0	0	0	0.509181	0	0.618621	2.22755	32.4053	0.0297112	0.479775	0.0275321	0.431854	0.435004	0.452474	0.382692	4.96198	1050.1	0.236741	11.0531	34028.9	-0.208575	0.347827	1.51062	1.85637	2.63353	1.09186	0.791978	-0.610549	0.579912	0.814679	0.835682	0.549214	0.786525	1.4925	5.69257	1.70258	88.2974	136.073	0.172369	1.85635	0.309392	0.433429	0.218149	0.901268	3.44604
901	228.75	447.302	5	100	0	0	0	1.37522	1	0.786438	2.72818	74.3695	0.381578	0.100833	0.394286	0.233395	0.487315	0.446007	0.618485	7.44297	5530.82	0.4864	20.3058	411325	-0.104336	0.435873	1.87139	2.19556	3.39033	2.71766	0.401737	-0.915755	0.707842	0.706371	-0.856641	0.515913	0.886813	1.65172	8.62378	22.4315	67.5685	79.6831	0.61772	2.04341	0.340569	0.387932	0.145725	0.895601	4.17554
900	210.625	450.117	5	100	0	0	0	0.747817	0	0.180995	5.45635	73.1774	0.277136	0.0479978	0.295083	0.160222	0.489659	0.489102	0.0327592	29.7718	5354.93	0.00592925	162.445	391860	-0.742333	0.736902	1.86438	1.19841	1.41959	2.19983	-0.735792	0.677208	0.180008	0.983665	-0.796067	-0.605208	0.425435	2.33588	8.55438	16.0893	73.9107	95.3436	0.526437	1.7592	0.2932	0.28611	0.176092	0.819048	3.09478
655	118.65	101.065	5	100	0	0	0	1.152	1	0.453928	3.52206	78.3162	0.462886	0.177827	0.461836	0.315446	0.451747	0.36069	0.206051	12.4049	6133.43	0.0935322	43.6908	480347	-0.343013	0.546797	1.89385	1.57448	2.23493	3.39049	-0.371354	-0.928491	0.438499	0.898732	0.221757	-0.975102	0.673742	1.87672	8.84964	27.5735	62.4265	68.0167	0.680357	2.23043	0.371739	0.406219	0.112889	0.944911	4.97483
1302	116.575	70.285	5	100	0	0	0	0.637296	0	0.535709	16.0631	15.8219	0.124603	0.469427	0.114785	0.449171	0.463319	0.482909	0.286984	258.023	250.333	0.15374	4144.65	3960.74	-0.271071	1.20583	1.19926	1.70866	2.82029	1.44492	-0.347719	-0.937599	0.510451	0.859907	-0.11369	-0.993516	0.731921	4.00788	3.97768	7.15783	82.8422	119.779	0.352992	2.10421	0.350702	0.456245	0.179293	0.947989	4.42772
930	139.743	51.795	5	100	0	0	0	0.479271	0	0.64106	37.3405	35.0394	0.397894	0.379623	0.41457	0.485594	0.450162	0.381052	0.410958	1394.31	1227.76	0.263449	52064.3	43020	-0.193101	1.57218	1.54456	1.89849	3.52711	3.21547	-0.350975	0.936385	0.598045	0.801462	-0.463447	-0.886125	0.800662	6.11069	5.91941	23.4466	66.5534	77.3069	0.630788	2.50889	0.418149	0.406232	0.0420884	1.02857	6.29455
1374	179.25	67.55	5	100	0	0	0	0.790681	0	0.618624	2.22755	85.2195	0.338446	0.405698	0.36326	0.494767	0.481514	0.401211	0.382696	4.96198	7262.36	0.236745	11.0531	618895	-0.208573	0.347827	1.93054	1.85637	2.63354	2.40702	0.791978	-0.610549	0.579915	0.814677	-0.386191	-0.922419	0.786527	1.4925	9.23144	19.7822	70.2178	86.0541	0.581761	2.4849	0.414149	0.403454	0.0626047	1.02407	6.17471
34	138.192	86.762	5	100	0	0	0	0.517367	0	0.634803	44.7174	17.9182	0.209494	0.454615	0.192935	0.459835	0.475803	0.493907	0.402975	1999.65	321.062	0.25581	89419	5752.85	-0.197361	1.65048	1.25329	1.88665	3.49675	1.85587	0.670663	0.741762	0.593019	0.805189	-0.80243	0.596746	0.796745	6.68711	4.23299	12.0927	77.9073	105.934	0.457705	2.28659	0.381098	0.457225	0.140109	0.984666	5.22849
4	115.04	23.15	5	100	0	0	0	0.432701	0	0.337494	61.2677	42.204	0.47306	0.298754	0.473966	0.42726	0.344651	0.281954	0.113902	3753.73	1781.18	0.0384413	229982	75172.8	-0.471734	1.78723	1.62535	1.40143	1.95676	4.02616	-0.999978	0.00664321	0.331124	0.943587	-0.978549	-0.206015	0.580942	7.82737	6.49646	28.2331	61.7669	66.5869	0.687794	2.29964	0.383274	0.385956	0.0861655	0.958393	5.28837
1022	76.869	58.907	5	100	0	0	0	0.486051	0	0.346772	53.4376	10.0128	0.0623791	0.475272	0.0574778	0.436911	0.445515	0.465499	0.120251	2855.58	100.256	0.0416996	152595	1003.84	-0.459956	1.72785	1.00056	1.41449	1.99187	1.20414	-0.0305201	-0.999534	0.339864	0.940475	-0.554716	-0.83204	0.588874	7.3101	3.1643	3.57638	86.4236	130.359	0.249758	1.94305	0.323842	0.441213	0.20489	0.916047	3.77546
33	91.444	93.582	5	100	0	0	0	0.539699	0	0.59583	52.5243	19.7729	0.0952252	0.481836	0.0901276	0.453852	0.460967	0.469463	0.355013	2758.8	390.968	0.211528	144904	7730.56	-0.224878	1.72036	1.29607	1.81454	3.24883	1.32816	0.772504	-0.63501	0.561196	0.827683	0.797623	0.603156	0.7719	7.24737	4.44667	5.46428	84.5357	124.726	0.308586	2.05147	0.341912	0.45741	0.193289	0.942457	4.20853
31	14.545	87.834	5	100	0	0	0	0.496418	0	0.564484	29.5937	19.7238	0.115705	0.47108	0.106704	0.448232	0.461489	0.480555	0.318642	875.787	389.028	0.179868	25917.8	7673.12	-0.248348	1.4712	1.29499	1.75854	3.0278	1.41023	-0.968558	-0.248789	0.53498	0.844865	0.767059	0.641577	0.751322	5.44001	4.44115	6.64429	83.3557	121.269	0.340154	2.08377	0.347294	0.454861	0.183209	0.944196	4.34208
32	47.184	90.061	5	100	0	0	0	0.553749	0	0.571759	35.7102	20.268	0.00953962	0.499746	0.00960208	0.44436	0.436196	0.417816	0.326908	1275.22	410.792	0.186913	45538.3	8325.93	-0.242787	1.55279	1.30681	1.77138	3.08175	1.02901	-0.913856	-0.406039	0.541112	0.84095	0.988417	0.151764	0.756147	5.9758	4.502	0.546588	89.4534	139.66	0.097671	1.81726	0.302877	0.427006	0.22883	0.901234	3.30243
729	4.762	116.762	5	100	0	0	0	0.509918	0	0.448677	17.8899	23.6361	0.3469	0.376194	0.301988	0.414841	0.431616	0.477661	0.201311	320.049	558.665	0.0903236	5725.64	13204.7	-0.348066	1.25261	1.37358	1.56624	2.39983	2.73577	-0.818994	0.573802	0.433774	0.901022	-0.997252	0.0740872	0.669834	4.22965	4.8617	20.2978	69.7022	84.795	0.588982	2.3492	0.391533	0.395517	0.0629502	0.969332	5.51874
1200	3.011	140.471	5	100	0	0	0	0.506374	0	0.360392	12.8928	36.9943	0.373098	0.367338	0.410586	0.483169	0.456478	0.357847	0.129882	166.224	1368.58	0.0468086	2143.1	50629.6	-0.443225	1.11035	1.56813	1.43389	2.01614	2.93661	0.320663	0.947193	0.352641	0.935759	-0.647891	0.761733	0.600327	3.59065	6.08229	21.9068	68.0932	80.9254	0.610817	2.44852	0.408086	0.391842	0.0517571	1.00628	5.99523
563	25.607	121.265	5	100	0	0	0	0.463368	0	0.556155	42.6738	19.4928	0.303369	0.421244	0.276042	0.453935	0.465579	0.48755	0.309308	1821.05	379.969	0.172023	77711.3	7406.66	-0.254804	1.63016	1.28987	1.74395	2.99816	2.43496	-0.965796	0.259302	0.527925	0.849291	0.599794	0.800154	0.745758	6.53252	4.41507	17.6601	72.3399	91.3342	0.550789	2.40772	0.401287	0.437589	0.0894641	1.0031	5.79711
69	17.677	160.836	5	100	0	0	0	0.581173	0	0.709199	33.2644	8.66161	0.0602301	0.454613	0.0537104	0.41662	0.433802	0.468951	0.502963	1106.52	75.0235	0.356701	36807.7	649.824	-0.149232	1.52198	0.937599	2.03236	4.00999	1.19616	0.961695	-0.274123	0.651226	0.758884	0.691214	-0.72265	0.84214	5.76753	2.94306	3.45302	86.547	130.732	0.245418	1.88793	0.314654	0.425211	0.200406	0.891547	3.56427
1118	36.987	219.082	5	100	0	0	0	0.633379	0	0.437037	16.8176	20.2034	0.131388	0.429093	0.11429	0.409982	0.441664	0.489797	0.191001	282.832	408.177	0.0834747	4756.55	8246.57	-0.359482	1.22576	1.30542	1.54811	2.34418	1.47492	-0.895537	-0.444987	0.423257	0.90601	0.976558	0.215254	0.661088	4.10093	4.49482	7.54981	82.4502	118.648	0.362475	2.01621	0.336036	0.419538	0.16732	0.904157	4.06512
994	14.441	218.72	5	100	0	0	0	0.540443	0	0.5825	34.3289	37.6264	0.450506	0.341048	0.447548	0.453672	0.392622	0.347433	0.339306	1178.47	1415.75	0.197646	40455.7	53269.4	-0.234704	1.53566	1.57549	1.79051	3.14421	3.73755	0.226633	-0.97398	0.550113	0.83509	-0.0726478	0.997358	0.763217	5.85909	6.13404	26.7762	63.2238	69.7653	0.671197	2.43283	0.405472	0.420085	0.0525467	1.00012	5.91866
972	0.6	202.13	5	100	0	0	0	0.938606	1	0.375854	3.52206	16.7972	0.012603	0.499572	0.0127017	0.445291	0.437628	0.418125	0.141266	12.4049	282.146	0.0530955	43.6908	4739.26	-0.424981	0.546797	1.22524	1.45623	1.97235	1.03836	-0.371354	-0.928491	0.367067	0.930194	-0.886274	-0.463162	0.613069	1.87672	4.09844	0.722118	89.2779	139.112	0.112263	1.82592	0.30432	0.427876	0.227534	0.902509	3.33399
1355	217.5	66.684	5	100	0	0	0	0.664198	0	0.174492	4.72534	68.368	0.361171	0.0926636	0.395119	0.235225	0.480736	0.449047	0.0304475	22.3288	4674.18	0.00531284	105.511	319565	-0.758224	0.674433	1.83485	1.19064	1.40012	2.7228	-0.999916	0.0129507	0.173608	0.984815	-0.679469	0.733704	0.417722	2.17378	8.26849	21.1721	68.8279	82.6811	0.600975	2.01396	0.33566	0.378145	0.146441	0.885003	4.05604
1442	217.313	77.185	5	100	0	0	0	1.16019	1	0.231321	5.45635	41.4355	0.380803	0.331834	0.434073	0.467346	0.434523	0.315722	0.0535094	29.7718	1716.9	0.0123778	162.445	71140.6	-0.635785	0.736902	1.61737	1.26026	1.55866	2.88287	-0.735792	0.677208	0.229264	0.973364	-0.560339	-0.828263	0.480958	2.33588	6.43704	22.3834	67.6166	79.7965	0.617092	2.3643	0.39405	0.407438	0.0613087	0.974909	5.58992
1356	228	66.251	5	100	0	0	0	0.97167	1	0.358363	3.15023	67.4513	0.370524	0.101146	0.413389	0.251842	0.474534	0.4366	0.128424	9.92395	4549.68	0.0460224	31.2627	306882	-0.445677	0.498342	1.82899	1.43098	1.90317	2.6905	-0.00863724	-0.999963	0.350742	0.936472	-0.995684	-0.0928083	0.598634	1.77489	8.21287	21.7479	68.2521	81.3034	0.608707	2.04804	0.341339	0.391957	0.1404	0.893104	4.19445
1419	217.359	74.451	5	100	0	0	0	0.728949	0	0.247171	6.30045	70.0163	0.349851	0.0860689	0.387037	0.228206	0.480121	0.454432	0.0610935	39.6957	4902.28	0.0151005	250.101	343240	-0.607002	0.799372	1.8452	1.2804	1.60911	2.6903	0.0172638	0.999851	0.244662	0.969608	0.784111	0.620621	0.497163	2.51007	8.36757	20.4782	69.5218	84.3567	0.591482	1.98572	0.330953	0.368444	0.149349	0.876758	3.94307
1306	182.375	61.993	5	100	0	0	0	0.602169	0	0.0869245	6.68264	72.7918	0.335316	0.0780206	0.375763	0.21865	0.479069	0.460673	0.00755587	44.6577	5298.65	0.00065679	298.431	385698	-1.06086	0.824948	1.86208	1.09081	1.18722	2.5953	0.388916	0.921273	0.0868151	0.996224	-0.509986	-0.860182	0.29483	2.58508	8.53181	19.5918	70.4082	86.5216	0.579065	1.94749	0.324582	0.35554	0.153059	0.865596	3.79272
649	0.25	435.178	5	100	0	0	0	0.38206	0	0.408712	2.72818	26.4706	0.307905	0.440751	0.297263	0.486303	0.485039	0.471036	0.167045	7.44297	700.693	0.0682735	20.3058	18547.8	-0.388583	0.435873	1.42276	1.50488	2.03586	2.2738	0.401737	-0.915755	0.397428	0.917633	0.972992	0.230837	0.639306	1.65172	5.14496	17.933	72.067	90.6463	0.554892	2.4883	0.414716	0.455894	0.0884574	1.03492	6.19162
1038	0.643	366.7	5	100	0	0	0	0.647223	0	0.3711	4.16736	25.3342	0.356785	0.415377	0.339751	0.475533	0.466565	0.457688	0.137715	17.3669	641.822	0.0511061	72.3741	16260	-0.430509	0.619861	1.40371	1.44933	1.97686	2.64671	-0.855112	-0.518443	0.362641	0.931929	0.200099	0.979776	0.60918	2.04141	5.03331	20.9029	69.0971	83.3292	0.597315	2.5117	0.418617	0.436532	0.0585124	1.03371	6.30863
1148	5.641	384.911	5	100	0	0	0	0.417798	0	0.367439	21.3659	22.8695	0.198421	0.471317	0.206649	0.490955	0.496785	0.447693	0.135011	456.502	523.014	0.0496085	9753.57	11961.1	-0.434815	1.32972	1.35926	1.44403	2.05948	1.79456	0.585299	-0.810818	0.359227	0.93325	-0.769687	-0.638421	0.606167	4.62233	4.78221	11.4446	78.5554	107.703	0.445445	2.31182	0.385303	0.459505	0.142635	0.996231	5.34451
1293	163.918	907.299	5	100	0	0	0	0.427896	0	0.53927	27.4179	29.4764	0.35736	0.415024	0.364132	0.494812	0.476968	0.425769	0.290812	751.741	868.858	0.156826	20611.2	25610.8	-0.268194	1.43803	1.46947	1.71475	2.87984	2.84559	0.755511	-0.655136	0.51351	0.858084	-0.932786	-0.360431	0.73435	5.23621	5.42922	20.9382	69.0618	83.2442	0.597796	2.53406	0.422344	0.420397	0.0564132	1.04219	6.42149
917	168.578	884.068	5	100	0	0	0	0.48383	0	0.656614	34.1113	14.0234	0.172955	0.475309	0.164319	0.471972	0.481858	0.483995	0.431142	1163.58	196.656	0.283094	39691.3	2757.78	-0.18269	1.5329	1.14685	1.92825	3.62708	1.66527	0.431558	-0.902085	0.610438	0.792064	0.993536	0.113522	0.810317	5.84049	3.74478	9.95967	80.0403	111.814	0.415879	2.25041	0.375068	0.473641	0.159983	0.985915	5.06434
1020	295.215	635.558	5	100	0	0	0	0.542013	0	0.595032	18.7696	12.2572	0.0720736	0.493487	0.0697421	0.458417	0.459868	0.456326	0.354063	352.298	150.239	0.210679	6612.49	1841.51	-0.22546	1.27346	1.08839	1.81309	3.16925	1.2388	-0.0798708	0.996805	0.560535	0.828131	-0.304269	0.952586	0.771383	4.33239	3.50103	4.1331	85.8669	128.685	0.268465	2.00991	0.334986	0.457372	0.205014	0.939918	4.03975
224	303.21	604.009	5	100	0	0	0	0.514765	0	0.620209	28.4394	24.5464	0.368327	0.38046	0.327508	0.429317	0.434045	0.46656	0.384659	808.799	602.526	0.238569	23001.8	14789.8	-0.207462	1.45392	1.38999	1.85932	3.36674	2.92979	-0.164318	-0.986407	0.581205	0.813757	-0.553317	0.832971	0.787533	5.33286	4.95443	21.6125	68.3875	81.6265	0.606899	2.40622	0.401036	0.404888	0.0511516	0.98897	5.78988
1225	279.262	570.324	5	100	0	0	0	0.522131	0	0.639539	34.1113	21.9943	0.028962	0.484968	0.0309265	0.439554	0.439989	0.396325	0.40901	1163.58	483.749	0.261578	39691.3	10639.7	-0.194133	1.5329	1.34231	1.89561	3.50973	1.09057	0.431558	-0.902085	0.596826	0.802371	-0.00315142	-0.999995	0.799712	5.84049	4.68981	1.65963	88.3404	136.206	0.170182	1.82072	0.303454	0.41794	0.213707	0.883663	3.31504
1164	283.875	637.178	5	100	0	0	0	3.36694	1	0.618601	2.22755	15.8209	0.095363	0.494161	0.0942766	0.468044	0.470197	0.454444	0.382667	4.96198	250.301	0.236718	11.0531	3959.99	-0.208589	0.347827	1.19923	1.85633	2.63346	1.31359	0.791978	-0.610549	0.579896	0.814691	-0.112697	-0.993629	0.786512	1.4925	3.97755	5.47221	84.5278	124.703	0.308809	2.07649	0.346081	0.461244	0.195046	0.953335	4.31179
217	248.017	590.092	5	100	0	0	0	0.425454	0	0.590996	41.1343	33.9745	0.242054	0.400292	0.278106	0.465963	0.483955	0.380835	0.349276	1692.03	1154.27	0.206421	69600.5	39215.6	-0.228415	1.6142	1.53115	1.80579	3.20673	2.04794	-0.289396	-0.95721	0.557188	0.830386	0.550547	-0.834804	0.768763	6.4136	5.82876	14.0078	75.9922	100.79	0.49199	2.2512	0.375201	0.390563	0.0978591	0.944741	5.06792
783	248.863	628.648	5	100	0	0	0	0.54541	0	0.649258	32.0876	15.8249	0.219267	0.462807	0.20685	0.473803	0.484391	0.488668	0.421536	1029.61	250.427	0.273686	33037.8	3962.99	-0.187583	1.50634	1.19934	1.91412	3.5707	1.90497	0.622297	0.782781	0.604596	0.796533	-0.11667	-0.993171	0.805765	5.66459	3.97805	12.666	77.334	104.38	0.46826	2.33579	0.389298	0.468305	0.136865	1.00149	5.4559
220	276.116	608.908	5	100	0	0	0	0.459783	0	0.497587	41.8813	28.9341	0.298545	0.433608	0.314903	0.498771	0.494608	0.428627	0.247593	1754.04	837.182	0.123199	73461.6	24223.1	-0.303131	1.62202	1.46141	1.64475	2.67377	2.41157	-0.862706	-0.505707	0.477307	0.878737	-0.612932	-0.790136	0.705398	6.47158	5.37904	17.3702	72.6298	92.0676	0.546393	2.46906	0.41151	0.431117	0.0864813	1.02637	6.09627
625	313.353	618.715	5	100	0	0	0	0.738534	0	0.465952	26.6377	8.34258	0.0104305	0.464197	0.00942268	0.412422	0.419388	0.44853	0.217111	709.567	69.5986	0.101163	18901.2	580.632	-0.331659	1.4255	0.9213	1.59353	2.49898	1.03173	0.997833	0.06579	0.449274	0.893394	0.882992	-0.469389	0.682607	5.16117	2.88835	0.597634	89.4024	139.5	0.10213	1.76439	0.294065	0.415905	0.220902	0.873404	3.11307
1202	295.4	655.975	5	100	0	0	0	0.550599	0	0.679839	31.581	26.5935	0.384465	0.366211	0.338678	0.418251	0.420824	0.457861	0.462181	997.36	707.214	0.314209	31497.6	18807.3	-0.167594	1.49943	1.42478	1.97356	3.78492	3.07553	0.164325	0.986406	0.628668	0.777674	0.993952	0.109816	0.824523	5.6197	5.15689	22.6105	67.3895	79.2613	0.620052	2.38629	0.397715	0.401358	0.0429575	0.978923	5.69438
967	320.718	637.141	5	100	0	0	0	0.606274	0	0.644469	29.6357	16.9385	0.0659254	0.496211	0.0646388	0.459555	0.45918	0.449495	0.41534	878.275	286.913	0.267674	26028.3	4859.87	-0.190798	1.47182	1.22887	1.90498	3.53073	1.21723	-0.97815	-0.207903	0.600774	0.799419	-0.942668	-0.333732	0.802788	5.44387	4.11564	3.77999	86.22	129.746	0.256759	1.99501	0.332501	0.454337	0.207601	0.937461	3.98005
315	622.268	609.86	5	100	0	0	0	0.651785	0	0.482888	43.4512	12.4947	0.19428	0.446378	0.175377	0.445418	0.466705	0.495985	0.233181	1888.01	156.118	0.1126	82036.2	1950.64	-0.316154	1.638	1.09673	1.62075	2.59909	1.77075	-0.50648	0.862252	0.464339	0.885658	-0.0716093	0.997433	0.694901	6.59175	3.53478	11.2027	78.7973	108.368	0.440772	2.22414	0.37069	0.445898	0.145257	0.964348	4.94681
816	519.286	621.887	5	100	0	0	0	0.602057	0	0.62291	19.61	22.9836	0.00824736	0.493404	0.00861126	0.438563	0.432852	0.3996	0.388017	384.552	528.246	0.2417	7541.07	12141	-0.205575	1.29248	1.36142	1.86435	3.34499	1.02503	0.689243	0.72453	0.583401	0.812184	-0.837369	-0.546639	0.789246	4.42832	4.79412	0.472544	89.5275	139.891	0.090815	1.78128	0.29688	0.416226	0.225452	0.884855	3.17295
305	510.135	589.182	5	100	0	0	0	0.49521	0	0.698447	44.2437	14.33	0.193181	0.459058	0.178224	0.459444	0.475258	0.492808	0.487828	1957.5	205.349	0.340722	86607.3	2942.65	-0.155867	1.64585	1.15625	2.01063	3.95581	1.76717	0.258436	0.966028	0.643029	0.765842	0.981465	-0.19164	0.835731	6.65159	3.7855	11.1385	78.8615	108.544	0.439524	2.25797	0.376329	0.459251	0.148253	0.97961	5.09844
629	533.201	606.542	5	100	0	0	0	0.541758	0	0.504102	16.2931	28.1608	0.14677	0.476116	0.155478	0.477797	0.485878	0.433237	0.254119	265.465	793.031	0.128102	4325.25	22332.4	-0.297482	1.212	1.44964	1.6555	2.65899	1.54363	-0.552313	-0.833637	0.483021	0.875609	0.11329	-0.993562	0.710001	4.03647	5.30668	8.43979	81.5602	116.1	0.383106	2.17528	0.362546	0.454676	0.164818	0.96149	4.73183
1105	500.028	808.631	5	100	0	0	0	0.796001	0	0.602886	15.0256	2.01002	0.0177445	0.438641	0.0154705	0.391357	0.4102	0.453966	0.363472	225.769	4.04018	0.219132	3392.31	8.12084	-0.219765	1.17683	0.3032	1.82739	3.18757	1.05412	0.630629	-0.776085	0.567022	0.823703	0.905082	-0.425237	0.776457	3.87629	1.41775	1.01674	88.9833	138.196	0.133208	1.72738	0.287896	0.400779	0.211264	0.848805	2.98384
1044	609.57	638.19	5	100	0	0	0	0.748533	0	0.504426	19.7988	31.3012	0.249733	0.44219	0.269201	0.492072	0.497371	0.424785	0.254446	391.992	979.765	0.128349	7760.98	30667.8	-0.297203	1.29664	1.49556	1.65603	2.67457	2.08357	0.812976	0.582298	0.483305	0.875452	-0.114475	0.993426	0.71023	4.44958	5.59475	14.4617	75.5383	99.5891	0.499733	2.37535	0.395892	0.433488	0.10949	1.00016	5.6423
1001	623.786	627.25	5	100	0	0	0	0.678818	0	0.139247	8.33472	78.6545	0.37052	0.104147	0.425888	0.264582	0.46603	0.426394	0.0193897	69.4676	6186.53	0.00269996	578.993	486598	-0.856214	0.920891	1.89572	1.14941	1.31511	2.88484	0.886654	-0.462434	0.138797	0.990321	-0.114432	-0.993431	0.373158	2.88699	8.86874	21.7477	68.2523	81.304	0.608704	2.05756	0.342927	0.398204	0.136322	0.893595	4.23356
772	607.46	785.904	5	100	0	0	0	0.935056	1	0.560279	15.2713	9.78446	0.0485666	0.467886	0.0441135	0.426002	0.436393	0.462778	0.313913	233.213	95.7357	0.175879	3561.46	936.722	-0.251596	1.18388	0.990537	1.75116	2.94734	1.15549	0.422918	-0.906168	0.531423	0.847107	-0.351977	-0.936009	0.748518	3.90785	3.12801	2.78376	87.2162	132.761	0.220378	1.88574	0.31429	0.431198	0.208151	0.899612	3.55601
235	452.137	666.858	5	100	0	0	0	0.531871	0	0.426412	33.6719	15.0846	0.23993	0.417825	0.21084	0.42764	0.455928	0.499339	0.181827	1133.8	227.545	0.0775333	38177.1	3432.43	-0.370171	1.52727	1.17853	1.53175	2.32137	2.02099	0.774307	-0.63281	0.413607	0.910456	0.583769	-0.81192	0.653002	5.80275	3.88389	13.8824	76.1176	101.122	0.489826	2.2515	0.37525	0.422733	0.119839	0.957436	5.06926
670	7.334	706.876	5	100	0	0	0	0.441116	0	0.367046	20.8962	18.6677	0.177779	0.481858	0.175116	0.484278	0.490102	0.472438	0.134723	436.651	348.483	0.0494495	9124.35	6505.38	-0.43528	1.32007	1.27109	1.44346	2.05735	1.68858	0.888905	-0.458092	0.35886	0.933391	-0.180855	0.98351	0.605843	4.57124	4.32061	10.2404	79.7596	111.031	0.421638	2.28157	0.380262	0.477148	0.157979	0.996183	5.20557
932	28.002	716.627	5	100	0	0	0	0.572988	0	0.536421	23.2028	31.2325	0.201712	0.421789	0.229084	0.463975	0.484298	0.392452	0.287747	538.37	975.469	0.154354	12491.7	30466.3	-0.270494	1.36554	1.49461	1.70988	2.85365	1.81503	-0.936198	-0.351474	0.511063	0.859543	-0.1824	0.983224	0.732408	4.81693	5.5886	11.6371	78.3629	107.176	0.449124	2.19331	0.365552	0.40712	0.120947	0.935366	4.81061
1109	4.461	726.245	5	100	0	0	0	0.610451	0	0.469443	15.3523	29.7573	0.116603	0.443285	0.131637	0.44359	0.464825	0.388017	0.220377	235.693	885.497	0.103454	3618.43	26350	-0.328417	1.18617	1.47359	1.5991	2.48688	1.41316	0.348212	-0.937416	0.45239	0.89182	-0.996145	-0.0877173	0.685159	3.9182	5.45503	6.69609	83.3039	121.118	0.341472	1.98796	0.331326	0.415651	0.162576	0.889279	3.95197
1308	5.925	735.645	5	100	0	0	0	0.848505	0	0.454775	4.98094	16.7234	0.0455173	0.498249	0.0460935	0.455844	0.452766	0.429493	0.20682	24.8098	279.672	0.0940567	123.576	4677.07	-0.342203	0.697311	1.22332	1.57582	2.30125	1.14448	-0.964156	0.265335	0.43926	0.89836	-0.849711	-0.527249	0.67437	2.2318	4.08943	2.60885	87.3911	133.295	0.213348	1.92796	0.321327	0.44113	0.214568	0.921794	3.71704
1324	12.388	741.661	5	100	0	0	0	0.804347	0	0.466927	11.9957	17.1599	0.0951071	0.492242	0.092371	0.464918	0.468175	0.461902	0.218021	143.897	294.462	0.1018	1726.14	5052.94	-0.330751	1.07903	1.23451	1.59508	2.45682	1.32515	-0.540197	0.841539	0.450144	0.892956	-0.992945	-0.11858	0.683321	3.46348	4.14245	5.45748	84.5425	124.746	0.308394	2.07472	0.345786	0.46341	0.195532	0.953189	4.30444
1218	32.941	731.53	5	100	0	0	0	0.541023	0	0.697325	9.70965	27.4336	0.188196	0.455857	0.204345	0.480242	0.491732	0.422587	0.486262	94.2773	752.602	0.339083	915.4	20646.6	-0.156565	0.987204	1.43828	2.00837	3.67371	1.73351	-0.281035	-0.959698	0.642169	0.766563	0.745133	-0.666916	0.83506	3.11603	5.23771	10.8475	79.1525	109.347	0.433816	2.24296	0.373827	0.439222	0.139653	0.967467	5.03087
1091	16.122	725.917	5	100	0	0	0	0.430681	0	0.573696	16.5948	27.474	0.188733	0.463109	0.202004	0.484483	0.493644	0.431493	0.329127	275.387	754.821	0.188819	4570	20737.9	-0.241318	1.21997	1.43892	1.77481	3.03148	1.74378	-0.775077	-0.631867	0.54274	0.839901	0.717589	-0.696467	0.757427	4.07367	5.24156	10.8789	79.1211	109.26	0.434434	2.26347	0.377244	0.447301	0.142556	0.977492	5.12328
615	0.25	515.718	5	100	0	0	0	0.560526	0	0.408705	2.72818	19.2986	0.24798	0.461244	0.23892	0.485045	0.490859	0.481687	0.16704	7.44297	372.436	0.06827	20.3058	7187.49	-0.38859	0.435873	1.28553	1.50487	2.03584	1.9621	0.401737	-0.915755	0.397421	0.917636	0.434105	0.900862	0.6393	1.65172	4.39302	14.358	75.642	99.8627	0.497976	2.40573	0.400956	0.471465	0.122444	1.01959	5.78756
1058	1.838	974.279	5	100	0	0	0	0.497884	0	0.115833	13.2721	20.7311	0.134296	0.489799	0.132884	0.477334	0.481818	0.464241	0.0134173	176.149	429.779	0.00155416	2337.86	8909.78	-0.936168	1.12294	1.31662	1.12281	1.25817	1.48633	0.648589	0.761139	0.115574	0.993299	0.952105	-0.305771	0.340342	3.64309	4.55314	7.71791	82.2821	118.165	0.366464	2.18037	0.363395	0.470788	0.1782	0.97525	4.75402
944	25.649	807.936	5	100	0	0	0	0.54956	0	0.637367	23.2028	23.6661	0.234682	0.466995	0.238498	0.496031	0.499071	0.460156	0.406237	538.37	560.084	0.258922	12491.7	13255	-0.19561	1.36554	1.37413	1.89149	3.45787	1.99415	-0.936198	-0.351474	0.595081	0.803665	-0.994581	0.103967	0.798353	4.81693	4.86478	13.5729	76.4271	101.947	0.48444	2.39543	0.399239	0.463576	0.126928	1.01828	5.7381
1014	17.591	800.208	5	100	0	0	0	0.816649	0	0.364072	5.22406	31.2291	0.358128	0.406782	0.374064	0.495268	0.475873	0.409469	0.132548	27.2908	975.257	0.0482572	142.569	30456.4	-0.438813	0.718008	1.49456	1.43918	1.97527	2.70413	-0.871928	0.489635	0.356082	0.934455	-0.185742	0.982599	0.603384	2.28562	5.5883	20.9853	69.0147	83.1306	0.598438	2.51958	0.419931	0.408126	0.0547922	1.03589	6.3483
1007	7.938	807.092	5	100	0	0	0	0.520086	0	0.506409	21.7114	36.6351	0.273624	0.433948	0.294714	0.494346	0.496118	0.421199	0.25645	471.385	1342.13	0.129869	10234.4	49169.1	-0.295499	1.33669	1.5639	1.65932	2.69052	2.23607	0.276114	-0.961125	0.48504	0.874492	-0.87431	0.485368	0.711624	4.65955	6.05269	15.88	74.12	95.8844	0.523091	2.41395	0.402325	0.427573	0.0967112	1.00894	5.82715
252	35.835	833.613	5	100	0	0	0	0.698124	0	0.458648	34.0383	28.6593	0.151571	0.449722	0.16821	0.462617	0.479266	0.40471	0.210358	1158.61	821.355	0.0964803	39437	23539.5	-0.33852	1.53197	1.45727	1.58193	2.47218	1.56882	0.496202	-0.868207	0.442736	0.896652	-0.375528	-0.926811	0.677236	5.83424	5.35344	8.71798	81.282	115.31	0.389321	2.1161	0.352683	0.427216	0.151465	0.927911	4.47786
1180	59.788	820.481	5	100	0	0	0	0.556057	0	0.616047	29.2988	29.0751	0.339693	0.421289	0.350712	0.497717	0.484084	0.426579	0.379514	858.42	845.361	0.233798	25150.7	24579	-0.210386	1.46685	1.46352	1.85159	3.34251	2.70715	-0.854437	-0.519555	0.577813	0.816169	-0.71789	-0.696157	0.784887	5.41284	5.39213	19.8582	70.1418	85.868	0.582832	2.52007	0.420012	0.423934	0.0654854	1.03918	6.35077
1015	39.35	802.372	5	100	0	0	0	0.749509	0	0.496528	10.5662	25.8351	0.149384	0.485289	0.145216	0.476304	0.482682	0.47355	0.24654	111.645	667.452	0.122414	1179.66	17243.7	-0.304056	1.02392	1.41221	1.64301	2.58179	1.55177	-0.909226	-0.416302	0.476376	0.879242	0.64602	0.76332	0.704647	3.25057	5.08282	8.59123	81.4088	115.67	0.386502	2.21243	0.368737	0.474927	0.171582	0.981329	4.89482
1462	51	836.581	5	100	0	0	0	0.611736	0	0.45322	2.72818	86.6618	0.135836	0.00828988	0.118712	0.0641501	0.461128	0.490772	0.205408	7.44297	7510.27	0.0930952	20.3058	650853	-0.343691	0.435873	1.93783	1.57337	2.17561	1.47344	0.401737	-0.915755	0.437863	0.899042	-0.964302	0.264805	0.673216	1.65172	9.30923	7.80696	82.193	117.909	0.368559	1.27889	0.213148	0.127274	0.20863	0.70016	1.63555
425	297.697	901.889	5	100	0	0	0	0.503146	0	0.67735	55.3316	36.8885	0.336149	0.371364	0.379952	0.479145	0.46929	0.360772	0.458803	3061.59	1360.76	0.31077	169402	50196.4	-0.169187	1.74297	1.56689	1.96865	3.81262	2.70029	-0.938088	0.346398	0.62673	0.779236	-0.724709	0.689055	0.823013	7.43852	6.07359	19.6424	70.3576	86.3971	0.579784	2.39667	0.399445	0.375658	0.0598346	0.987543	5.74404
560	317.757	869.55	5	100	0	0	0	0.450816	0	0.573759	47.043	30.6074	0.140952	0.430545	0.160965	0.444787	0.469577	0.384622	0.329199	2213.04	936.813	0.188881	104108	28673.4	-0.24127	1.6725	1.48583	1.77493	3.1071	1.52145	0.0808016	-0.99673	0.542793	0.839867	-0.72327	0.690565	0.757469	6.85879	5.5324	8.10294	81.8971	117.061	0.375436	2.03145	0.338575	0.407583	0.148069	0.892983	4.12678
1495	897.75	998.96	5	100	0	0	0	0.518359	0	0.18398	5.22406	23.5337	0.0148826	0.479751	0.0160745	0.429474	0.430378	0.38383	0.0338486	27.2908	553.835	0.00622747	142.569	13033.8	-0.735229	0.718008	1.37169	1.20199	1.42681	1.0455	-0.871928	0.489635	0.182944	0.983123	-0.999601	-0.0282411	0.428929	2.28562	4.85115	0.852742	89.1473	138.705	0.121994	1.75439	0.292398	0.406652	0.216637	0.864662	3.07788
1473	574.229	997.626	5	100	0	0	0	0.97158	1	0.191755	9.45068	17.3677	0.274026	0.415934	0.243293	0.436371	0.458285	0.495136	0.03677	89.3154	301.637	0.00705083	844.091	5238.74	-0.717253	0.975463	1.23974	1.21137	1.45628	2.19646	-0.0258991	-0.999665	0.190582	0.981671	-0.996047	0.0888232	0.437898	3.0742	4.16746	15.904	74.096	95.8224	0.523475	2.32305	0.387174	0.426153	0.103406	0.976159	5.39654
1471	507.947	996.932	5	100	0	0	0	0.508644	0	0.30074	11.8918	23.3089	0.158735	0.479247	0.165651	0.48322	0.489731	0.443256	0.0904445	141.415	543.305	0.0272003	1681.68	12663.8	-0.521809	1.07525	1.36752	1.35086	1.79794	1.59487	-0.624562	0.780975	0.296227	0.955118	-0.968155	-0.250353	0.548398	3.44845	4.82793	9.13348	80.8665	114.134	0.398416	2.21984	0.369973	0.461251	0.16177	0.975771	4.92769
1381	75.256	993.824	5	100	0	0	0	0.633776	0	0.652904	14.7759	28.6129	0.33838	0.425795	0.344151	0.496967	0.484399	0.436093	0.426284	218.327	818.698	0.278322	3225.98	23425.3	-0.185151	1.16955	1.45656	1.92111	3.49226	2.66731	0.802852	-0.596179	0.607496	0.794323	-0.332135	-0.943232	0.808025	3.84394	5.3491	19.7782	70.2218	86.0639	0.581704	2.52578	0.420964	0.430944	0.0674878	1.04213	6.37959
206	276.219	762.582	5	100	0	0	0	0.516401	0	0.596705	24.9048	34.9999	0.426354	0.368242	0.423697	0.4696	0.425782	0.383326	0.356057	620.249	1224.99	0.212461	15447.2	42874.6	-0.22424	1.39628	1.54407	1.81612	3.20748	3.46479	-0.225972	0.974134	0.56192	0.827192	-0.428092	-0.903735	0.772467	4.99047	5.91607	25.2364	64.7636	73.2048	0.652958	2.497	0.416167	0.424739	0.0360093	1.02257	6.23501
1212	251.157	743.704	5	100	0	0	0	0.708679	0	0.644897	34.9734	29.4918	0.391672	0.397485	0.383289	0.478802	0.454101	0.425056	0.415892	1223.14	869.766	0.268208	42777.3	25651	-0.19051	1.54374	1.4697	1.90579	3.5482	3.14854	-0.403996	-0.914761	0.601116	0.799162	-0.938226	-0.346024	0.803055	5.91383	5.43064	23.0586	66.9414	78.2109	0.625837	2.53041	0.421734	0.41127	0.0381711	1.03655	6.40295
1475	270.375	754.092	5	100	0	0	0	0.539411	0	0.618611	2.22755	50.4353	0.272444	0.40617	0.30653	0.480012	0.488137	0.39065	0.38268	4.96198	2543.72	0.23673	11.0531	128293	-0.208582	0.347827	1.70273	1.85635	2.6335	2.06426	0.791978	-0.610549	0.579904	0.814685	0.169003	0.985616	0.786518	1.4925	7.10178	15.8098	74.1902	96.0663	0.521962	2.34394	0.390657	0.39841	0.088067	0.976963	5.49407
205	261.42	765.029	5	100	0	0	0	0.634289	0	0.466843	11.1377	8.84895	0.098344	0.44736	0.087146	0.419531	0.442452	0.481016	0.217942	124.048	78.3039	0.101745	1381.61	692.907	-0.330829	1.0468	0.946892	1.59495	2.45009	1.33544	-0.989917	0.141648	0.450069	0.892994	0.544529	-0.838742	0.683259	3.33732	2.97472	5.64382	84.3562	124.197	0.313598	1.97585	0.329308	0.430991	0.184326	0.905838	3.90398
200	222.101	748.421	5	100	0	0	0	0.655473	0	0.49382	28.483	34.1899	0.261933	0.396179	0.29986	0.470705	0.484155	0.379736	0.243858	811.281	1168.95	0.120422	23107.7	39966.3	-0.306431	1.45459	1.5339	1.63856	2.64008	2.16576	-0.207155	-0.978308	0.473993	0.880529	0.359395	-0.933186	0.702723	5.33695	5.84721	15.1848	74.8152	97.6916	0.511794	2.29257	0.382095	0.387958	0.0890768	0.956897	5.25587
717	43.66	621.851	5	100	0	0	0	0.447845	0	0.613292	33.4502	21.9195	0.252749	0.417408	0.222974	0.431126	0.457307	0.498434	0.376127	1118.92	480.464	0.230676	37428	10531.5	-0.212333	1.5244	1.34083	1.8465	3.33509	2.10443	0.894503	-0.447061	0.575563	0.817758	0.0715873	-0.997434	0.78313	5.78361	4.68183	14.6402	75.3598	99.1189	0.502741	2.28	0.38	0.424267	0.1139	0.965021	5.19839
151	58.127	678.743	5	100	0	0	0	0.519856	0	0.387023	73.9122	12.5607	0.0256115	0.494961	0.0245304	0.44474	0.440615	0.43783	0.149787	5463.01	157.771	0.0579709	403783	1981.72	-0.412263	1.86872	1.09901	1.47259	2.1598	1.07967	-0.996409	0.0846711	0.377433	0.926037	-0.00567058	0.999984	0.622112	8.59722	3.54411	1.46759	88.5324	136.799	0.160036	1.86829	0.311381	0.439222	0.222766	0.910974	3.4905
1155	50.407	649.538	5	100	0	0	0	0.511432	0	0.658371	29.2565	24.2854	0.127415	0.486702	0.122794	0.469617	0.475901	0.472242	0.433452	855.943	589.781	0.285372	25041.9	14323.1	-0.181529	1.46622	1.38535	1.93164	3.62467	1.46025	-0.831702	-0.555222	0.611829	0.79099	-0.749523	0.661978	0.811401	5.40893	4.92802	7.32024	82.6798	119.31	0.356952	2.15467	0.359112	0.47093	0.181361	0.968621	4.64261
780	71.596	616.843	5	100	0	0	0	0.623927	0	0.367929	8.03153	25.1248	0.143655	0.485697	0.147681	0.481366	0.486453	0.448805	0.135372	64.5055	631.256	0.0498072	518.078	15860.2	-0.434236	0.904798	1.4001	1.44474	2.02106	1.52353	0.98428	-0.176617	0.359684	0.933074	-0.00794115	0.999968	0.606572	2.834	5.01246	8.2594	81.7406	116.615	0.379018	2.19366	0.365609	0.465086	0.17094	0.973716	4.81213
927	94.004	623.182	5	100	0	0	0	0.635188	0	0.266097	12.4024	18.8681	0.19606	0.435835	0.174298	0.434398	0.460364	0.497886	0.0708076	153.82	356.005	0.0188417	1907.73	6717.14	-0.57496	1.09351	1.27573	1.30486	1.68374	1.77387	-0.163237	0.986587	0.262968	0.964805	0.018543	0.999828	0.515846	3.5217	4.34374	11.3067	78.6933	108.082	0.442787	2.19884	0.366473	0.435117	0.142465	0.952522	4.8349
959	106.277	639.922	5	100	0	0	0	0.516789	0	0.680271	29.4677	30.9763	0.425231	0.368182	0.400881	0.451489	0.419562	0.411075	0.462769	868.345	959.531	0.314808	25588.1	29722.7	-0.167318	1.46935	1.49103	1.97441	3.78045	3.45823	-0.929615	-0.368533	0.629004	0.777402	-0.425602	0.904911	0.824785	5.42842	5.56564	25.1653	64.8347	73.3656	0.652097	2.47642	0.412737	0.415319	0.0276871	1.01289	6.13266
902	77.114	637.588	5	100	0	0	0	0.474026	0	0.661774	36.7715	28.3356	0.263029	0.441666	0.281274	0.495192	0.49792	0.428101	0.437945	1352.14	802.906	0.28982	49720.3	22750.8	-0.17929	1.56551	1.45233	1.93823	3.66984	2.17348	-0.80019	0.599747	0.614517	0.788903	-0.0612278	-0.998124	0.813495	6.06395	5.32312	15.2499	74.7501	97.5217	0.512864	2.40718	0.401197	0.434883	0.103946	1.00984	5.79453
419	775.375	499.134	5	100	0	0	0	0.676269	0	0.500251	24.6543	31.9367	0.274321	0.418361	0.303056	0.487059	0.491798	0.403354	0.250251	607.835	1019.95	0.125188	14985.7	32573.9	-0.300812	1.39189	1.50429	1.64914	2.66607	2.24129	-0.460396	0.887714	0.479646	0.877462	0.497551	0.867435	0.707284	4.96531	5.65126	15.9216	74.0784	95.777	0.523757	2.37795	0.396325	0.410857	0.0910679	0.991921	5.65464
417	758.174	514.826	5	100	0	0	0	0.641881	0	0.535281	19.0972	14.0408	0.161692	0.475071	0.15269	0.467585	0.478225	0.484034	0.286526	364.703	197.144	0.153372	6964.81	2768.06	-0.271418	1.28097	1.14739	1.70793	2.8331	1.60894	0.245121	0.969493	0.510083	0.860125	0.99536	0.0962179	0.731629	4.37003	3.74711	9.30512	80.6949	113.65	0.402109	2.2193	0.369883	0.471328	0.164861	0.978149	4.92528
853	756.375	528.059	5	100	0	0	0	1.41118	1	0.618601	2.22755	89.8462	0.137088	0.0104246	0.139056	0.0694933	0.464298	0.49023	0.382667	4.96198	8072.34	0.236718	11.0531	725269	-0.208589	0.347827	1.9535	1.85633	2.63346	1.47236	0.791978	-0.610549	0.579896	0.814691	0.952086	-0.305829	0.786512	1.4925	9.47872	7.87938	82.1206	117.701	0.370254	1.31059	0.218432	0.138072	0.206248	0.706375	1.71765
413	739.328	516.925	5	100	0	0	0	0.974719	1	0.47201	29.0436	25.5893	0.0703566	0.473433	0.0646773	0.4374	0.447082	0.467886	0.222793	843.531	654.812	0.105161	24499.2	16756.2	-0.326049	1.46305	1.40806	1.60321	2.53178	1.23366	-0.695608	-0.718421	0.454677	0.890656	0.440862	0.897575	0.68703	5.38921	5.05859	4.03447	85.9655	128.981	0.265248	1.96083	0.326806	0.442241	0.201285	0.918363	3.84487
926	746.887	538.353	5	100	0	0	0	0.857524	0	0.544837	18.5703	36.4514	0.414799	0.362075	0.433834	0.47785	0.432332	0.35901	0.296847	344.856	1328.7	0.161733	6404.08	48433.1	-0.263733	1.26882	1.56171	1.72433	2.88238	3.33279	-0.27564	0.961261	0.518279	0.855212	-0.948261	0.317493	0.738131	4.30933	6.0375	24.5067	65.4933	74.8638	0.644049	2.4799	0.413317	0.423565	0.0458786	1.0176	6.1499
852	754.5	528.708	5	100	0	0	0	1.77711	1	0.554133	3.15023	28.1326	0.0306541	0.48504	0.0327185	0.440282	0.440921	0.397154	0.307063	9.92395	791.443	0.170154	31.2627	22265.4	-0.256386	0.498342	1.44921	1.74043	2.56634	1.09524	-0.00863724	-0.999963	0.526206	0.850357	0.14126	-0.989973	0.744401	1.77489	5.30402	1.75663	88.2434	135.907	0.175083	1.82677	0.304462	0.418718	0.213112	0.885023	3.33709
373	912.682	843.855	5	100	0	0	0	0.660392	0	0.343312	11.6813	21.5953	0.245265	0.465113	0.24577	0.495316	0.497784	0.465992	0.117863	136.453	466.357	0.0404638	1593.95	10071.1	-0.464311	1.06749	1.33436	1.40961	1.94842	2.03956	-0.77396	0.633235	0.336608	0.941645	0.385591	-0.92267	0.585928	3.41779	4.64707	14.1975	75.8025	100.287	0.495242	2.41524	0.40254	0.465553	0.122419	1.02331	5.83338
226	375.816	784.063	5	100	0	0	0	0.621082	0	0.570597	35.115	16.9958	0.269601	0.419002	0.240105	0.438563	0.460251	0.495764	0.325581	1233.06	288.857	0.185776	43299	4909.36	-0.243671	1.54549	1.23034	1.76932	3.0739	2.20384	-0.52905	-0.848591	0.540135	0.841579	-0.960233	-0.279199	0.755379	5.92579	4.1226	15.6405	74.3595	96.505	0.519231	2.32329	0.387214	0.428782	0.106055	0.977675	5.39766
618	894.765	865.043	5	100	0	0	0	0.603018	0	0.475944	25.2018	43.7005	0.434456	0.32281	0.466202	0.460321	0.393693	0.302526	0.226523	635.131	1909.73	0.107812	16006.4	83456.3	-0.322444	1.40143	1.64049	1.60953	2.54529	3.55686	0.0690039	0.997616	0.458178	0.888861	-0.278082	0.960557	0.689887	5.02014	6.61064	25.7507	64.2493	72.0467	0.659133	2.38001	0.396668	0.414075	0.0702014	0.984233	5.66444
1053	879.375	874.902	5	100	0	0	0	0.706652	0	0.618611	2.22755	89.3133	0.329621	0.0608075	0.306173	0.168819	0.499068	0.482991	0.38268	4.96198	7976.87	0.23673	11.0531	712440	-0.208582	0.347827	1.95092	1.85635	2.6335	2.35994	0.791978	-0.610549	0.579904	0.814685	0.975439	0.220269	0.786518	1.4925	9.45057	19.2458	70.7542	87.374	0.574126	1.84748	0.307913	0.317897	0.17209	0.846722	3.41318
1201	600.917	977.221	5	100	0	0	0	0.838973	0	0.52705	17.0375	57.789	0.477973	0.166364	0.431405	0.273445	0.443778	0.35716	0.277782	290.276	3339.57	0.146405	4945.58	192990	-0.278148	1.23141	1.76185	1.69393	2.78005	3.98947	-0.971038	-0.238926	0.502986	0.864295	0.945892	0.324482	0.725982	4.12765	7.60191	28.5531	61.4469	65.8988	0.691356	2.15013	0.358354	0.394282	0.119175	0.917344	4.62304
1393	599.279	992.79	5	100	0	0	0	0.836412	0	0.362975	16.0631	51.4235	0.458057	0.250696	0.495943	0.409808	0.383552	0.242411	0.131751	258.023	2644.38	0.0478223	4144.65	135983	-0.440123	1.20583	1.71116	1.4376	2.0338	3.76068	-0.347719	-0.937599	0.355057	0.934845	0.91601	0.401156	0.602474	4.00788	7.17102	27.2618	62.7382	68.6976	0.676799	2.24047	0.373411	0.39668	0.105666	0.944691	5.01969
1375	612.435	992.156	5	100	0	0	0	0.723628	0	0.48061	14.7759	37.0047	0.32217	0.435066	0.325315	0.497428	0.48896	0.446496	0.230986	218.327	1369.35	0.111014	3225.98	50672.3	-0.318207	1.16955	1.56826	1.61706	2.53689	2.5546	0.802852	-0.596179	0.46232	0.886713	-0.639934	0.76843	0.69326	3.84394	6.08315	18.7942	71.2058	88.4928	0.5676	2.51544	0.419239	0.440781	0.077733	1.04153	6.32741
1137	574.085	983.366	5	100	0	0	0	0.793456	0	0.29025	25.0537	36.0951	0.177866	0.418527	0.204003	0.45188	0.475656	0.38324	0.0842451	627.688	1302.86	0.0244521	15725.9	47026.7	-0.537228	1.39887	1.55745	1.33676	1.77509	1.69428	-0.078959	0.996878	0.286192	0.958172	-0.999448	-0.0332094	0.538749	5.00537	6.00792	10.2455	79.7545	111.017	0.421742	2.11117	0.351862	0.400884	0.128759	0.9087	4.45705
1427	626.018	994.754	5	100	0	0	0	0.6191	0	0.521118	14.4362	23.3084	0.0911664	0.484269	0.0964664	0.463072	0.468454	0.42196	0.271564	208.404	543.282	0.141517	3008.56	12663	-0.283064	1.15945	1.36751	1.68391	2.73443	1.31092	0.955622	-0.294596	0.49785	0.867263	-0.968029	-0.250837	0.721885	3.7995	4.82788	5.23071	84.7693	125.416	0.301938	2.02539	0.337565	0.442516	0.189931	0.929553	4.1022
1477	588.375	997.012	5	100	0	0	0	2.1024	1	0.618601	2.22755	70.9145	0.415645	0.367105	0.429933	0.478713	0.434574	0.367986	0.382667	4.96198	5028.87	0.236718	11.0531	356620	-0.208589	0.347827	1.85074	1.85633	2.63346	2.84536	0.791978	-0.610549	0.579896	0.814691	0.97397	-0.226678	0.786512	1.4925	8.42107	24.5599	65.4401	74.742	0.644705	2.49396	0.415659	0.422789	0.0428195	1.02265	6.21982
459	651.627	957.623	5	100	0	0	0	0.496086	0	0.482402	42.8185	13.2739	0.146785	0.472257	0.136852	0.459212	0.471863	0.484881	0.232712	1833.42	176.196	0.112261	78504.5	2338.81	-0.316591	1.63163	1.123	1.61996	2.59622	1.54352	-0.918313	0.395855	0.463908	0.885883	0.649958	0.75997	0.694552	6.54358	3.64334	8.44066	81.5593	116.098	0.383125	2.17185	0.361975	0.465537	0.170755	0.965371	4.71693
456	647.748	928.56	5	100	0	0	0	0.563834	0	0.282481	56.309	30.411	0.308028	0.426693	0.326708	0.497825	0.491804	0.421828	0.0797955	3170.7	924.829	0.0225407	178539	28125	-0.549011	1.75058	1.48303	1.32642	1.75443	2.48405	-0.23738	0.971417	0.278739	0.960367	-0.844123	0.53615	0.531489	7.50393	5.51462	17.9404	72.0596	90.6276	0.555003	2.47289	0.412148	0.42426	0.0801646	1.02534	6.11517
830	558.6	946.219	5	100	0	0	0	0.748256	0	0.411275	3.52206	68.6047	0.402169	0.122079	0.429991	0.268864	0.475477	0.418616	0.169147	12.4049	4706.6	0.069566	43.6908	322895	-0.385868	0.546797	1.83635	1.50874	2.0887	2.93642	-0.371354	-0.928491	0.399778	0.916612	-0.488473	0.872579	0.641307	1.87672	8.2828	23.7138	66.2862	76.6872	0.634168	2.1172	0.352866	0.410392	0.132706	0.913861	4.48252
1142	546.86	985.5	5	100	0	0	0	0.610244	0	0.6744	38.1294	39.0182	0.384791	0.377495	0.411025	0.486991	0.455814	0.373089	0.454815	1453.85	1522.42	0.306727	55434.5	59402.1	-0.171082	1.58126	1.59127	1.96285	3.76353	3.1012	0.417133	0.908846	0.624429	0.781082	0.968488	0.249059	0.821219	6.1749	6.24645	22.6308	67.3692	79.2138	0.620315	2.48921	0.414868	0.397908	0.0467759	1.02158	6.19614
1078	901.753	383.045	5	100	0	0	0	0.584105	0	0.608083	34.3289	28.9301	0.106306	0.441655	0.120496	0.43792	0.459978	0.383201	0.369765	1178.47	836.951	0.224848	40455.7	24213.1	-0.216037	1.53566	1.46135	1.83691	3.30355	1.37269	0.226633	-0.97398	0.571295	0.820745	-0.609767	-0.792581	0.779797	5.85909	5.37867	6.10242	83.8976	122.85	0.326046	1.94956	0.324926	0.41056	0.1659	0.878109	3.80077
800	902.709	449.802	5	100	0	0	0	0.686937	0	0.603804	22.1638	36.761	0.33774	0.373174	0.380385	0.480347	0.469479	0.362676	0.364579	491.234	1351.37	0.220134	10887.6	49677.8	-0.219104	1.34564	1.56539	1.82906	3.24003	2.68871	-0.171795	-0.985133	0.567778	0.823182	-0.806443	0.591312	0.777048	4.70784	6.06309	19.7392	70.2608	86.1595	0.581154	2.4038	0.400634	0.376779	0.0594211	0.990302	5.77826
1396	998.25	483.428	5	100	0	0	0	0.418562	0	0.322293	4.16736	61.6603	0.436938	0.195916	0.495892	0.371357	0.414277	0.299548	0.103873	17.3669	3801.99	0.0334775	72.3741	234432	-0.491749	0.619861	1.79001	1.38029	1.81905	3.25067	-0.855112	-0.518443	0.316742	0.948512	-0.921355	0.388721	0.567709	2.04141	7.85241	25.9087	64.0913	71.6929	0.661013	2.21393	0.368988	0.392817	0.107289	0.93513	4.90148
1438	992.083	495.665	5	100	0	0	0	0.752161	0	0.588966	18.3012	12.2051	0.0678314	0.492789	0.0653714	0.456235	0.457615	0.45608	0.346881	334.934	148.964	0.204301	6129.69	1818.13	-0.22991	1.26248	1.08654	1.80212	3.13054	1.22339	-0.521285	0.853383	0.555502	0.831516	-0.353463	0.935448	0.767441	4.27799	3.49358	3.88944	86.1106	129.417	0.260445	1.99592	0.332654	0.456157	0.20656	0.936636	3.9837
1040	998.7	540.4	5	100	0	0	0	0.626978	0	0.26469	3.52206	14.758	0.211507	0.453359	0.19444	0.459006	0.475407	0.494452	0.0700608	12.4049	217.799	0.0185444	43.6908	3214.27	-0.577262	0.546797	1.16903	1.30303	1.6362	1.80505	-0.371354	-0.928491	0.26161	0.965174	0.813394	-0.581713	0.51448	1.87672	3.84161	12.2107	77.7893	105.613	0.459899	2.28817	0.381362	0.456183	0.139023	0.984509	5.23573
445	995.21	516.454	5	100	0	0	0	1.0257	1	0.283356	16.7437	27.3063	0.0200348	0.478848	0.0216712	0.430813	0.432653	0.38508	0.0802906	280.351	745.634	0.0227508	4694.12	20360.5	-0.547668	1.22385	1.43626	1.32758	1.74592	1.06182	-0.860238	-0.509892	0.279579	0.960123	0.823773	-0.56692	0.532312	4.09191	5.22554	1.14799	88.852	137.788	0.141544	1.7691	0.29485	0.407946	0.2143	0.866742	3.12971
564	887.129	529.571	5	100	0	0	0	0.504082	0	0.599674	33.2644	26.1319	0.169847	0.461188	0.183933	0.476949	0.488442	0.422696	0.359609	1106.52	682.876	0.215648	36807.7	17844.9	-0.222085	1.52198	1.41717	1.82152	3.24823	1.65483	0.961695	-0.274123	0.564373	0.82552	0.841016	0.54101	0.774386	5.76753	5.11194	9.77892	80.2211	112.319	0.412125	2.20305	0.367176	0.441942	0.149126	0.959219	4.85345
[truncated: 3,665 more rows]
[truncated: 5 more columns]
