# Supplementary material
Source: MDPI journal article supplement (https://www.mdpi.com/2073-4352/12/9/1247)
Supplement: s1 [file s1 › README.txt]

This folder contains a file named "Data for Learning Process.xslx" which has all the experimental data that is obtained from EBSD analysis for Mg and AZ31 alloy.
It also contains the transformed features that are needed for this work.
